# Supplementary material
Source: publisher figshare collection journal article supplement (https://acs.figshare.com/ndownloader/files/10824815)
Supplement: Supplementary file 1 [file 10824815]

data_171012_swy_l7
_audit_creation_date              2017-10-13
_audit_creation_method
;
Olex2 1.2
(compiled 2017.03.28 svn.r3405 for OlexSys, GUI svn.r5381)
;
_shelx_SHELXL_version_number      '2016/6'
_publ_contact_author_address      ?
_publ_contact_author_email        ?
_publ_contact_author_id_orcid     ?
_publ_contact_author_name         ''
_publ_contact_author_phone        ?
_publ_section_references
;
Dolomanov, O.V., Bourhis, L.J., Gildea, R.J, Howard, J.A.K. & Puschmann, H.
 (2009), J. Appl. Cryst. 42, 339-341.

Sheldrick, G.M. (2008). Acta Cryst. A64, 112-122.

Sheldrick, G.M. (2015). Acta Cryst. C71, 3-8.
;
_chemical_name_common             ?
_chemical_name_systematic         ?
_chemical_formula_moiety          '2(C50 H48 N O P), C6 H14 O'
_chemical_formula_sum             'C106 H110 N2 O3 P2'
_chemical_formula_weight          1521.89
_chemical_absolute_configuration  rmad
_chemical_melting_point           ?
_chemical_oxdiff_formula          'c h n o p'
loop_
  _atom_type_symbol
  _atom_type_description
  _atom_type_scat_dispersion_real
  _atom_type_scat_dispersion_imag
  _atom_type_scat_source
 'C' 'C' 0.0181 0.0091 'International Tables Vol C Tables 4.2.6.8 and 6.1.1.4'
 'H' 'H' 0.0000 0.0000 'International Tables Vol C Tables 4.2.6.8 and 6.1.1.4'
 'N' 'N' 0.0311 0.0180 'International Tables Vol C Tables 4.2.6.8 and 6.1.1.4'
 'O' 'O' 0.0492 0.0322 'International Tables Vol C Tables 4.2.6.8 and 6.1.1.4'
 'P' 'P' 0.2955 0.4335 'International Tables Vol C Tables 4.2.6.8 and 6.1.1.4'

_shelx_space_group_comment
;
The symmetry employed for this shelxl refinement is uniquely defined
by the following loop, which should always be used as a source of
symmetry information in preference to the above space-group names.
They are only intended as comments.
;
_space_group_crystal_system       'monoclinic'
_space_group_IT_number            4
_space_group_name_H-M_alt         'P 1 21 1'
_space_group_name_Hall            'P 2yb'
loop_
  _space_group_symop_operation_xyz
 'x, y, z'
 '-x, y+1/2, -z'

_cell_length_a                    11.6873(3)
_cell_length_b                    15.3134(3)
_cell_length_c                    14.6013(4)
_cell_angle_alpha                 90
_cell_angle_beta                  110.631(3)
_cell_angle_gamma                 90
_cell_volume                      2445.63(10)
_cell_formula_units_Z             1
_cell_measurement_reflns_used     18390
_cell_measurement_temperature     293(2)
_cell_measurement_theta_max       66.6609
_cell_measurement_theta_min       3.2314
_shelx_estimated_absorpt_T_max    0.771
_shelx_estimated_absorpt_T_min    0.711
_exptl_absorpt_coefficient_mu     0.761
_exptl_absorpt_correction_T_max   1.00000
_exptl_absorpt_correction_T_min   0.34633
_exptl_absorpt_correction_type    multi-scan
_exptl_absorpt_process_details
;
CrysAlisPro, Agilent Technologies,
Version 1.171.35.11 (release 16-05-2011 CrysAlis171 .NET)
(compiled May 16 2011,17:55:39)
Empirical absorption correction using spherical harmonics,
 implemented in SCALE3 ABSPACK scaling algorithm.
;
_exptl_absorpt_special_details    ?
_exptl_crystal_colour             colourless
_exptl_crystal_colour_primary     colourless
_exptl_crystal_density_diffrn     1.033
_exptl_crystal_density_meas       ?
_exptl_crystal_density_method     ?
_exptl_crystal_description        block
_exptl_crystal_F_000              814
_exptl_crystal_size_max           0.48
_exptl_crystal_size_mid           0.46
_exptl_crystal_size_min           0.36
_exptl_transmission_factor_max    ?
_exptl_transmission_factor_min    ?
_diffrn_reflns_av_R_equivalents   0.0523
_diffrn_reflns_av_unetI/netI      0.0257
_diffrn_reflns_Laue_measured_fraction_full 0.993
_diffrn_reflns_Laue_measured_fraction_max 0.993
_diffrn_reflns_limit_h_max        13
_diffrn_reflns_limit_h_min        -13
_diffrn_reflns_limit_k_max        18
_diffrn_reflns_limit_k_min        -18
_diffrn_reflns_limit_l_max        17
_diffrn_reflns_limit_l_min        -17
_diffrn_reflns_number             41724
_diffrn_reflns_point_group_measured_fraction_full 0.986
_diffrn_reflns_point_group_measured_fraction_max 0.986
_diffrn_reflns_theta_full         66.771
_diffrn_reflns_theta_max          66.771
_diffrn_reflns_theta_min          4.194
_diffrn_ambient_temperature       293.15
_diffrn_detector_area_resol_mean  10.3592
_diffrn_measured_fraction_theta_full 0.993
_diffrn_measured_fraction_theta_max 0.993
_diffrn_measurement_details
;
#__ type_ start__ end____ width___ exp.time_
  1 omega   14.00   96.00   1.0000    3.0000
omega____ theta____ kappa____ phi______ frames
    -       41.5636 -125.0000 -180.0000 82

#__ type_ start__ end____ width___ exp.time_
  2 omega   17.00  111.00   1.0000    3.0000
omega____ theta____ kappa____ phi______ frames
    -       41.5636   38.0000  -60.0000 94

#__ type_ start__ end____ width___ exp.time_
  3 omega   23.00  109.00   1.0000    3.0000
omega____ theta____ kappa____ phi______ frames
    -       41.5636   38.0000   30.0000 86

#__ type_ start__ end____ width___ exp.time_
  4 omega   68.00  106.00   1.0000    8.0000
omega____ theta____ kappa____ phi______ frames
    -       93.5000   45.0000    0.0000 38

#__ type_ start__ end____ width___ exp.time_
  5 omega   27.00   76.00   1.0000    8.0000
omega____ theta____ kappa____ phi______ frames
    -       93.5000  -45.0000  -30.0000 49

#__ type_ start__ end____ width___ exp.time_
  6 omega   94.00  177.00   1.0000    8.0000
omega____ theta____ kappa____ phi______ frames
    -       93.5000   15.0000 -150.0000 83

#__ type_ start__ end____ width___ exp.time_
  7 omega   68.00  166.00   1.0000    8.0000
omega____ theta____ kappa____ phi______ frames
    -       93.5000   45.0000   60.0000 98

#__ type_ start__ end____ width___ exp.time_
  8 omega   20.00  116.00   1.0000    8.0000
omega____ theta____ kappa____ phi______ frames
    -       93.5000  -77.0000 -180.0000 96

#__ type_ start__ end____ width___ exp.time_
  9 omega  140.00  172.00   1.0000    8.0000
omega____ theta____ kappa____ phi______ frames
    -       93.5000   77.0000    0.0000 32

#__ type_ start__ end____ width___ exp.time_
 10 omega   20.00   77.00   1.0000    8.0000
omega____ theta____ kappa____ phi______ frames
    -       93.5000  -45.0000   30.0000 57

#__ type_ start__ end____ width___ exp.time_
 11 omega    7.00  137.00   1.0000    8.0000
omega____ theta____ kappa____ phi______ frames
    -       93.5000    0.0000   30.0000 130

#__ type_ start__ end____ width___ exp.time_
 12 omega   37.00   63.00   1.0000    8.0000
omega____ theta____ kappa____ phi______ frames
    -       93.5000  -77.0000   90.0000 26

#__ type_ start__ end____ width___ exp.time_
 13 omega   84.00  111.00   1.0000    8.0000
omega____ theta____ kappa____ phi______ frames
    -       93.5000  -77.0000   90.0000 27

#__ type_ start__ end____ width___ exp.time_
 14 omega   67.00  107.00   1.0000    8.0000
omega____ theta____ kappa____ phi______ frames
    -       93.5000   77.0000    0.0000 40

#__ type_ start__ end____ width___ exp.time_
 15 omega   36.00   72.00   1.0000    8.0000
omega____ theta____ kappa____ phi______ frames
    -       93.5000  -45.0000 -150.0000 36

#__ type_ start__ end____ width___ exp.time_
 16 omega  121.00  168.00   1.0000    8.0000
omega____ theta____ kappa____ phi______ frames
    -       93.5000   45.0000    0.0000 47

#__ type_ start__ end____ width___ exp.time_
 17 omega   19.00   71.00   1.0000    8.0000
omega____ theta____ kappa____ phi______ frames
    -       93.5000  -45.0000   90.0000 52

#__ type_ start__ end____ width___ exp.time_
 18 omega  -99.00  -18.00   1.0000    3.0000
omega____ theta____ kappa____ phi______ frames
    -      -41.5636  125.0000  -60.0000 81

#__ type_ start__ end____ width___ exp.time_
 19 omega    8.00  120.00   1.0000    3.0000
omega____ theta____ kappa____ phi______ frames
    -       41.5636   77.0000  150.0000 112

#__ type_ start__ end____ width___ exp.time_
 20 omega    8.00  120.00   1.0000    3.0000
omega____ theta____ kappa____ phi______ frames
    -       41.5636   77.0000   60.0000 112

#__ type_ start__ end____ width___ exp.time_
 21 omega -161.00  -50.00   1.0000    8.0000
omega____ theta____ kappa____ phi______ frames
    -      -83.0000  -76.0000  158.0000 111

#__ type_ start__ end____ width___ exp.time_
 22 omega -162.00  -49.00   1.0000    8.0000
omega____ theta____ kappa____ phi______ frames
    -      -83.0000  -77.0000   90.0000 113

#__ type_ start__ end____ width___ exp.time_
 23 omega   63.00  168.00   1.0000    8.0000
omega____ theta____ kappa____ phi______ frames
    -       93.5000   63.0000 -137.0000 105

#__ type_ start__ end____ width___ exp.time_
 24 omega    8.00  131.00   1.0000    8.0000
omega____ theta____ kappa____ phi______ frames
    -       93.5000  -89.0000   71.0000 123

#__ type_ start__ end____ width___ exp.time_
 25 omega   63.00  168.00   1.0000    8.0000
omega____ theta____ kappa____ phi______ frames
    -       93.5000   63.0000  -85.0000 105

#__ type_ start__ end____ width___ exp.time_
 26 omega   60.00  172.00   1.0000    8.0000
omega____ theta____ kappa____ phi______ frames
    -       93.5000   77.0000  -60.0000 112

#__ type_ start__ end____ width___ exp.time_
 27 omega   66.00  168.00   1.0000    8.0000
omega____ theta____ kappa____ phi______ frames
    -       93.5000   45.0000  150.0000 102

#__ type_ start__ end____ width___ exp.time_
 28 omega    8.00  132.00   1.0000    8.0000
omega____ theta____ kappa____ phi______ frames
    -       93.5000  -91.0000  -65.0000 124

#__ type_ start__ end____ width___ exp.time_
 29 omega   19.00   77.00   1.0000    8.0000
omega____ theta____ kappa____ phi______ frames
    -       93.5000  -45.0000  -90.0000 58

#__ type_ start__ end____ width___ exp.time_
 30 omega    8.00  120.00   1.0000    3.0000
omega____ theta____ kappa____ phi______ frames
    -       41.5636   77.0000  -90.0000 112

#__ type_ start__ end____ width___ exp.time_
 31 omega    8.00  120.00   1.0000    3.0000
omega____ theta____ kappa____ phi______ frames
    -       41.5636   77.0000    0.0000 112

#__ type_ start__ end____ width___ exp.time_
 32 omega   11.00  116.00   1.0000    3.0000
omega____ theta____ kappa____ phi______ frames
    -       41.5636   63.0000 -137.0000 105

#__ type_ start__ end____ width___ exp.time_
 33 omega -162.00  -49.00   1.0000    8.0000
omega____ theta____ kappa____ phi______ frames
    -      -83.0000  -78.0000   22.0000 113
;
_diffrn_measurement_device_type   'Xcalibur, Atlas, Gemini ultra'
_diffrn_measurement_method        '\w scans'
_diffrn_orient_matrix_UB_11       0.0796392000
_diffrn_orient_matrix_UB_12       -0.0665423000
_diffrn_orient_matrix_UB_13       0.0744498000
_diffrn_orient_matrix_UB_21       -0.1136126000
_diffrn_orient_matrix_UB_22       -0.0322111000
_diffrn_orient_matrix_UB_23       0.0202957000
_diffrn_orient_matrix_UB_31       -0.0239068000
_diffrn_orient_matrix_UB_32       -0.0682266000
_diffrn_orient_matrix_UB_33       -0.0822397000
_diffrn_radiation_monochromator   mirror
_diffrn_radiation_type            CuK\a
_diffrn_radiation_wavelength      1.54184
_diffrn_source                    'Enhance Ultra (Cu) X-ray Source'
_reflns_Friedel_coverage          0.908
_reflns_Friedel_fraction_full     0.979
_reflns_Friedel_fraction_max      0.978
_reflns_number_gt                 7792
_reflns_number_total              8562
_reflns_odcompleteness_completeness 99.98
_reflns_odcompleteness_iscentric  1
_reflns_odcompleteness_theta      64.99
_reflns_special_details
;
 Reflections were merged by SHELXL according to the crystal
 class for the calculation of statistics and refinement.
 
 _reflns_Friedel_fraction is defined as the number of unique
 Friedel pairs measured divided by the number that would be
 possible theoretically, ignoring centric projections and
 systematic absences.
;
_reflns_threshold_expression      'I > 2\s(I)'
_computing_cell_refinement
;
CrysAlisPro, Agilent Technologies,
Version 1.171.35.11 (release 16-05-2011 CrysAlis171 .NET)
(compiled May 16 2011,17:55:39)
;
_computing_data_collection
;
CrysAlisPro, Agilent Technologies,
Version 1.171.35.11 (release 16-05-2011 CrysAlis171 .NET)
(compiled May 16 2011,17:55:39)
;
_computing_data_reduction
;
CrysAlisPro, Agilent Technologies,
Version 1.171.35.11 (release 16-05-2011 CrysAlis171 .NET)
(compiled May 16 2011,17:55:39)
;
_computing_molecular_graphics     'Olex2 (Dolomanov et al., 2009)'
_computing_publication_material   'Olex2 (Dolomanov et al., 2009)'
_computing_structure_refinement   'ShelXL (Sheldrick, 2015)'
_computing_structure_solution     'ShelXS (Sheldrick, 2008)'
_refine_diff_density_max          0.447
_refine_diff_density_min          -0.239
_refine_diff_density_rms          0.053
_refine_ls_abs_structure_details
;
 Flack x determined using 3374 quotients [(I+)-(I-)]/[(I+)+(I-)]
 (Parsons, Flack and Wagner, Acta Cryst. B69 (2013) 249-259).
;
_refine_ls_abs_structure_Flack    -0.01(2)
_refine_ls_extinction_coef        .
_refine_ls_extinction_method      none
_refine_ls_goodness_of_fit_ref    1.046
_refine_ls_hydrogen_treatment     constr
_refine_ls_matrix_type            full
_refine_ls_number_parameters      551
_refine_ls_number_reflns          8562
_refine_ls_number_restraints      4
_refine_ls_R_factor_all           0.0637
_refine_ls_R_factor_gt            0.0585
_refine_ls_restrained_S_all       1.048
_refine_ls_shift/su_max           0.063
_refine_ls_shift/su_mean          0.001
_refine_ls_structure_factor_coef  Fsqd
_refine_ls_weighting_details
'w=1/[\s^2^(Fo^2^)+(0.1127P)^2^+0.2275P] where P=(Fo^2^+2Fc^2^)/3'
_refine_ls_weighting_scheme       calc
_refine_ls_wR_factor_gt           0.1537
_refine_ls_wR_factor_ref          0.1623
_refine_special_details           ?
_olex2_refinement_description
;
1. Fixed Uiso
 At 1.2 times of:
  All C(H) groups, All C(H,H) groups
 At 1.5 times of:
  All C(H,H,H) groups
2. Restrained distances
 C56-C54 = C55-C54
 1.53 with sigma of 0.02
 C56-C55
 2.53 with sigma of 0.04
3. Others
 Fixed Sof: O2(0.5) C51(0.5) H51A(0.5) H51B(0.5) H51C(0.5) C52(0.5) H52(0.5)
 C53(0.5) H53A(0.5) H53B(0.5) H53C(0.5) C54(0.5) H54(0.5) C55(0.5) H55A(0.5)
 H55B(0.5) H55C(0.5) C56(0.5) H56A(0.5) H56B(0.5) H56C(0.5)
4.a Ternary CH refined with riding coordinates:
 C1(H1), C2(H2), C52(H52), C54(H54)
4.b Secondary CH2 refined with riding coordinates:
 C11(H11A,H11B), C13(H13A,H13B)
4.c Aromatic/amide H refined with riding coordinates:
 C5(H5), C7(H7), C18(H18), C20(H20), C22(H22), C23(H23), C24(H24), C25(H25),
 C26(H26), C28(H28), C29(H29), C30(H30), C31(H31), C32(H32), C40(H40), C41(H41),
  C42(H42), C43(H43), C44(H44), C46(H46), C47(H47), C48(H48), C49(H49), C50(H50)
4.d Idealised Me refined as rotating group:
 C33(H33A,H33B,H33C), C34(H34A,H34B,H34C), C35(H35A,H35B,H35C), C36(H36A,H36B,
 H36C), C37(H37A,H37B,H37C), C38(H38A,H38B,H38C), C51(H51A,H51B,H51C), C53(H53A,
 H53B,H53C), C55(H55A,H55B,H55C), C56(H56A,H56B,H56C)
;
_atom_sites_solution_hydrogens    geom
_atom_sites_solution_primary      direct
_atom_sites_solution_secondary    ?
loop_
  _atom_site_label
  _atom_site_type_symbol
  _atom_site_fract_x
  _atom_site_fract_y
  _atom_site_fract_z
  _atom_site_U_iso_or_equiv
  _atom_site_adp_type
  _atom_site_occupancy
  _atom_site_site_symmetry_order
  _atom_site_calc_flag
  _atom_site_refinement_flags_posn
  _atom_site_refinement_flags_adp
  _atom_site_refinement_flags_occupancy
  _atom_site_disorder_assembly
  _atom_site_disorder_group
 P1 P 0.37353(8) 0.11227(6) 0.70560(7) 0.0570(3) Uani 1 1 d . . . . .
 O1 O -0.0252(2) 0.1621(2) 0.44960(19) 0.0680(7) Uani 1 1 d . . . . .
 N1 N 0.1150(3) 0.2669(2) 0.4604(2) 0.0562(7) Uani 1 1 d . . . . .
 C1 C 0.0574(3) 0.2483(3) 0.3556(3) 0.0574(8) Uani 1 1 d . . . . .
 H1 H 0.007965 0.298992 0.323969 0.069 Uiso 1 1 calc R . . . .
 C2 C -0.0299(3) 0.1705(3) 0.3505(3) 0.0579(8) Uani 1 1 d . . . . .
 H2 H 0.002972 0.117497 0.331423 0.069 Uiso 1 1 calc R . . . .
 C3 C 0.0626(3) 0.2187(2) 0.5047(3) 0.0524(7) Uani 1 1 d . . . . .
 C4 C 0.0777(3) 0.2187(2) 0.6097(2) 0.0512(7) Uani 1 1 d . . . . .
 C5 C -0.0087(3) 0.1710(3) 0.6349(3) 0.0647(9) Uani 1 1 d . . . . .
 H5 H -0.067551 0.139639 0.586114 0.078 Uiso 1 1 calc R . . . .
 C6 C -0.0110(4) 0.1680(4) 0.7291(3) 0.0765(11) Uani 1 1 d . . . . .
 C7 C 0.0767(4) 0.2153(4) 0.8007(3) 0.0763(11) Uani 1 1 d . . . . .
 H7 H 0.076285 0.216001 0.864241 0.092 Uiso 1 1 calc R . . . .
 C8 C 0.1650(3) 0.2617(3) 0.7782(3) 0.0603(8) Uani 1 1 d . . . . .
 C9 C 0.1693(3) 0.2637(2) 0.6840(2) 0.0498(7) Uani 1 1 d . . . . .
 C10 C 0.2772(3) 0.3194(2) 0.6820(3) 0.0505(7) Uani 1 1 d . . . . .
 C11 C 0.3506(3) 0.3323(3) 0.7922(3) 0.0608(9) Uani 1 1 d . . . . .
 H11A H 0.418375 0.291474 0.813498 0.073 Uiso 1 1 calc R . . . .
 H11B H 0.383381 0.391111 0.803987 0.073 Uiso 1 1 calc R . . . .
 C12 C 0.2642(4) 0.3165(3) 0.8499(3) 0.0700(10) Uani 1 1 d . . . . .
 C13 C 0.2362(3) 0.4075(2) 0.6272(3) 0.0593(8) Uani 1 1 d . . . . .
 H13A H 0.157852 0.400431 0.574879 0.071 Uiso 1 1 calc R . . . .
 H13B H 0.227557 0.451574 0.672050 0.071 Uiso 1 1 calc R . . . .
 C14 C 0.3340(4) 0.4359(2) 0.5848(3) 0.0617(9) Uani 1 1 d . . . . .
 C15 C 0.4009(3) 0.3518(2) 0.5856(3) 0.0527(8) Uani 1 1 d . . . . .
 C16 C 0.3649(3) 0.2841(2) 0.6339(2) 0.0463(7) Uani 1 1 d . . . . .
 C17 C 0.4223(3) 0.2025(2) 0.6435(2) 0.0483(7) Uani 1 1 d . . . . .
 C18 C 0.5157(3) 0.1921(2) 0.6062(3) 0.0533(7) Uani 1 1 d . . . . .
 H18 H 0.554684 0.138269 0.613194 0.064 Uiso 1 1 calc R . . . .
 C19 C 0.5532(3) 0.2589(3) 0.5589(3) 0.0577(8) Uani 1 1 d . . . . .
 C20 C 0.4942(3) 0.3387(2) 0.5487(3) 0.0581(8) Uani 1 1 d . . . . .
 H20 H 0.517311 0.384116 0.516697 0.070 Uiso 1 1 calc R . . . .
 C21 C 0.1454(4) 0.2286(3) 0.3039(3) 0.0663(10) Uani 1 1 d . . . . .
 C22 C 0.2673(4) 0.2131(3) 0.3530(3) 0.0678(9) Uani 1 1 d . . . . .
 H22 H 0.299390 0.219530 0.420616 0.081 Uiso 1 1 calc R . . . .
 C23 C 0.3435(5) 0.1879(4) 0.3032(5) 0.0924(15) Uani 1 1 d . . . . .
 H23 H 0.426188 0.178209 0.337521 0.111 Uiso 1 1 calc R . . . .
 C24 C 0.2981(7) 0.1773(5) 0.2051(6) 0.120(2) Uani 1 1 d . . . . .
 H24 H 0.348727 0.158395 0.172228 0.144 Uiso 1 1 calc R . . . .
 C25 C 0.1780(8) 0.1944(8) 0.1544(5) 0.153(4) Uani 1 1 d . . . . .
 H25 H 0.146682 0.187343 0.086814 0.183 Uiso 1 1 calc R . . . .
 C26 C 0.1018(6) 0.2224(7) 0.2036(4) 0.124(3) Uani 1 1 d . . . . .
 H26 H 0.020938 0.236973 0.168352 0.149 Uiso 1 1 calc R . . . .
 C27 C -0.1603(3) 0.1832(3) 0.2838(3) 0.0629(9) Uani 1 1 d . . . . .
 C28 C -0.2046(5) 0.1369(5) 0.1982(4) 0.0980(18) Uani 1 1 d . . . . .
 H28 H -0.154008 0.097171 0.182707 0.118 Uiso 1 1 calc R . . . .
 C29 C -0.3231(8) 0.1482(8) 0.1345(5) 0.147(4) Uani 1 1 d . . . . .
 H29 H -0.352331 0.116722 0.076456 0.177 Uiso 1 1 calc R . . . .
 C30 C -0.3959(6) 0.2058(9) 0.1579(7) 0.151(4) Uani 1 1 d . . . . .
 H30 H -0.476038 0.213678 0.115656 0.181 Uiso 1 1 calc R . . . .
 C31 C -0.3536(6) 0.2521(7) 0.2421(7) 0.136(3) Uani 1 1 d . . . . .
 H31 H -0.404680 0.292010 0.256549 0.164 Uiso 1 1 calc R . . . .
 C32 C -0.2345(4) 0.2407(4) 0.3074(4) 0.0901(15) Uani 1 1 d . . . . .
 H32 H -0.206239 0.271757 0.365893 0.108 Uiso 1 1 calc R . . . .
 C33 C -0.1060(6) 0.1145(6) 0.7524(5) 0.117(2) Uani 1 1 d . . . . .
 H33A H -0.085589 0.111893 0.822062 0.176 Uiso 1 1 calc GR . . . .
 H33B H -0.107956 0.056530 0.727010 0.176 Uiso 1 1 calc GR . . . .
 H33C H -0.184816 0.141281 0.722997 0.176 Uiso 1 1 calc GR . . . .
 C34 C 0.2068(7) 0.4027(4) 0.8692(5) 0.1075(19) Uani 1 1 d . . . . .
 H34A H 0.162586 0.430453 0.807922 0.161 Uiso 1 1 calc GR . . . .
 H34B H 0.270368 0.440927 0.908233 0.161 Uiso 1 1 calc GR . . . .
 H34C H 0.151926 0.390039 0.903236 0.161 Uiso 1 1 calc GR . . . .
 C35 C 0.3305(6) 0.2709(5) 0.9465(4) 0.1066(19) Uani 1 1 d . . . . .
 H35A H 0.274747 0.261725 0.980705 0.160 Uiso 1 1 calc GR . . . .
 H35B H 0.397353 0.306619 0.985702 0.160 Uiso 1 1 calc GR . . . .
 H35C H 0.361121 0.215697 0.934279 0.160 Uiso 1 1 calc GR . . . .
 C36 C 0.2737(5) 0.4721(3) 0.4806(4) 0.0831(13) Uani 1 1 d . . . . .
 H36A H 0.335848 0.491534 0.456428 0.125 Uiso 1 1 calc GR . . . .
 H36B H 0.221622 0.520276 0.481633 0.125 Uiso 1 1 calc GR . . . .
 H36C H 0.225958 0.427032 0.438657 0.125 Uiso 1 1 calc GR . . . .
 C37 C 0.4218(5) 0.5048(3) 0.6488(5) 0.0871(14) Uani 1 1 d . . . . .
 H37A H 0.455912 0.483822 0.714868 0.131 Uiso 1 1 calc GR . . . .
 H37B H 0.377956 0.558049 0.647528 0.131 Uiso 1 1 calc GR . . . .
 H37C H 0.486434 0.515495 0.623971 0.131 Uiso 1 1 calc GR . . . .
 C38 C 0.6564(4) 0.2452(3) 0.5210(4) 0.0812(13) Uani 1 1 d . . . . .
 H38A H 0.732293 0.261790 0.570407 0.122 Uiso 1 1 calc GR . . . .
 H38B H 0.642679 0.280274 0.463615 0.122 Uiso 1 1 calc GR . . . .
 H38C H 0.659836 0.184708 0.504740 0.122 Uiso 1 1 calc GR . . . .
 C39 C 0.5138(4) 0.0477(3) 0.7548(3) 0.0597(8) Uani 1 1 d . . . . .
 C40 C 0.6011(4) 0.0779(4) 0.8408(3) 0.0790(12) Uani 1 1 d . . . . .
 H40 H 0.586902 0.129928 0.867872 0.095 Uiso 1 1 calc R . . . .
 C41 C 0.7088(5) 0.0327(5) 0.8876(4) 0.0962(17) Uani 1 1 d . . . . .
 H41 H 0.765799 0.054180 0.945185 0.115 Uiso 1 1 calc R . . . .
 C42 C 0.7302(5) -0.0439(4) 0.8480(5) 0.0982(18) Uani 1 1 d . . . . .
 H42 H 0.801995 -0.074797 0.878906 0.118 Uiso 1 1 calc R . . . .
 C43 C 0.6472(6) -0.0748(4) 0.7639(6) 0.1064(19) Uani 1 1 d . . . . .
 H43 H 0.662790 -0.126434 0.736889 0.128 Uiso 1 1 calc R . . . .
 C44 C 0.5378(5) -0.0295(3) 0.7173(4) 0.0851(13) Uani 1 1 d . . . . .
 H44 H 0.480810 -0.052055 0.660305 0.102 Uiso 1 1 calc R . . . .
 C45 C 0.2782(3) 0.0452(2) 0.6026(3) 0.0613(9) Uani 1 1 d . . . . .
 C46 C 0.1822(4) -0.0006(3) 0.6148(4) 0.0809(13) Uani 1 1 d . . . . .
 H46 H 0.168343 0.004072 0.673554 0.097 Uiso 1 1 calc R . . . .
 C47 C 0.1071(5) -0.0528(4) 0.5416(6) 0.0981(18) Uani 1 1 d . . . . .
 H47 H 0.044898 -0.084565 0.552050 0.118 Uiso 1 1 calc R . . . .
 C48 C 0.1234(5) -0.0583(4) 0.4540(5) 0.0950(18) Uani 1 1 d . . . . .
 H48 H 0.071077 -0.092521 0.404209 0.114 Uiso 1 1 calc R . . . .
 C49 C 0.2158(5) -0.0139(4) 0.4390(5) 0.0915(14) Uani 1 1 d . . . . .
 H49 H 0.227260 -0.018008 0.379301 0.110 Uiso 1 1 calc R . . . .
 C50 C 0.2940(4) 0.0383(3) 0.5141(4) 0.0738(11) Uani 1 1 d . . . . .
 H50 H 0.357394 0.068584 0.503780 0.089 Uiso 1 1 calc R . . . .
 O2 O 0.2359(14) -0.0718(8) 1.0435(8) 0.149(4) Uani 0.5 1 d . . P . .
 C51 C 0.3887(19) -0.0157(19) 0.988(2) 0.195(12) Uani 0.5 1 d . . P . .
 H51A H 0.372064 0.040641 0.957687 0.292 Uiso 0.5 1 calc GR . P . .
 H51B H 0.437009 -0.049297 0.959775 0.292 Uiso 0.5 1 calc GR . P . .
 H51C H 0.432680 -0.008796 1.057107 0.292 Uiso 0.5 1 calc GR . P . .
 C52 C 0.2700(16) -0.0625(11) 0.9730(9) 0.122(5) Uani 0.5 1 d . . P . .
 H52 H 0.296289 -0.122440 0.967770 0.146 Uiso 0.5 1 calc R . P . .
 C53 C 0.177(3) -0.055(4) 0.8807(19) 0.31(3) Uani 0.5 1 d . . P . .
 H53A H 0.145306 0.003399 0.871968 0.467 Uiso 0.5 1 calc GR . P . .
 H53B H 0.112379 -0.095355 0.876540 0.467 Uiso 0.5 1 calc GR . P . .
 H53C H 0.209687 -0.068225 0.830469 0.467 Uiso 0.5 1 calc GR . P . .
 C54 C 0.2193(19) -0.1226(15) 1.0954(13) 0.160(8) Uani 0.5 1 d D . P . .
 H54 H 0.130790 -0.113773 1.074812 0.192 Uiso 0.5 1 calc R . P . .
 C55 C 0.214(6) -0.2224(15) 1.076(4) 0.38(4) Uani 0.5 1 d D . P . .
 H55A H 0.131680 -0.242738 1.060514 0.577 Uiso 0.5 1 calc GR . P . .
 H55B H 0.266945 -0.252107 1.132776 0.577 Uiso 0.5 1 calc GR . P . .
 H55C H 0.240088 -0.234105 1.021442 0.577 Uiso 0.5 1 calc GR . P . .
 C56 C 0.243(3) -0.119(2) 1.1992(12) 0.25(2) Uani 0.5 1 d D . P . .
 H56A H 0.310789 -0.080797 1.229839 0.378 Uiso 0.5 1 calc GR . P . .
 H56B H 0.262405 -0.176653 1.226541 0.378 Uiso 0.5 1 calc GR . P . .
 H56C H 0.171918 -0.097767 1.210394 0.378 Uiso 0.5 1 calc GR . P . .

loop_
  _atom_site_aniso_label
  _atom_site_aniso_U_11
  _atom_site_aniso_U_22
  _atom_site_aniso_U_33
  _atom_site_aniso_U_23
  _atom_site_aniso_U_13
  _atom_site_aniso_U_12
 P1 0.0591(5) 0.0505(4) 0.0671(5) 0.0095(4) 0.0293(4) 0.0026(4)
 O1 0.0621(14) 0.0817(18) 0.0530(13) 0.0066(12) 0.0113(11) -0.0210(13)
 N1 0.0490(14) 0.0653(18) 0.0566(16) -0.0012(14) 0.0213(13) -0.0036(13)
 C1 0.0482(16) 0.066(2) 0.0566(19) 0.0056(16) 0.0167(14) 0.0014(15)
 C2 0.0536(17) 0.067(2) 0.0514(18) -0.0003(16) 0.0160(14) 0.0017(16)
 C3 0.0396(14) 0.0567(19) 0.0587(18) 0.0022(15) 0.0144(13) 0.0004(13)
 C4 0.0406(14) 0.0589(18) 0.0560(17) 0.0048(15) 0.0194(13) 0.0066(13)
 C5 0.0484(17) 0.082(3) 0.067(2) 0.0009(19) 0.0238(16) -0.0062(17)
 C6 0.064(2) 0.101(3) 0.074(2) 0.005(2) 0.0357(19) -0.013(2)
 C7 0.075(2) 0.101(3) 0.064(2) 0.002(2) 0.038(2) -0.003(2)
 C8 0.0583(19) 0.069(2) 0.058(2) -0.0009(17) 0.0263(16) 0.0036(16)
 C9 0.0455(15) 0.0532(17) 0.0542(18) 0.0030(14) 0.0219(13) 0.0075(13)
 C10 0.0469(15) 0.0495(17) 0.0556(18) -0.0017(14) 0.0188(14) 0.0034(13)
 C11 0.0573(19) 0.065(2) 0.057(2) -0.0070(17) 0.0165(16) -0.0036(16)
 C12 0.070(2) 0.084(3) 0.057(2) -0.0064(19) 0.0238(18) -0.006(2)
 C13 0.0587(19) 0.0521(19) 0.070(2) 0.0029(16) 0.0269(17) 0.0093(15)
 C14 0.063(2) 0.0468(17) 0.078(2) 0.0079(17) 0.0278(18) 0.0036(15)
 C15 0.0486(16) 0.0455(17) 0.063(2) 0.0017(14) 0.0187(15) -0.0020(13)
 C16 0.0409(14) 0.0470(16) 0.0515(17) 0.0001(13) 0.0167(13) -0.0021(12)
 C17 0.0439(14) 0.0463(16) 0.0549(17) 0.0037(13) 0.0175(13) 0.0001(12)
 C18 0.0464(15) 0.0495(18) 0.066(2) 0.0022(15) 0.0221(14) 0.0026(13)
 C19 0.0495(17) 0.0575(19) 0.072(2) 0.0020(16) 0.0292(16) -0.0039(15)
 C20 0.0550(18) 0.0508(18) 0.074(2) 0.0073(16) 0.0291(16) -0.0035(15)
 C21 0.064(2) 0.080(3) 0.061(2) 0.0009(19) 0.0296(17) -0.0093(19)
 C22 0.065(2) 0.071(2) 0.074(2) 0.0064(19) 0.0336(19) 0.0052(18)
 C23 0.085(3) 0.087(3) 0.126(4) 0.005(3) 0.064(3) 0.007(3)
 C24 0.130(5) 0.142(6) 0.126(5) -0.037(4) 0.092(5) -0.030(5)
 C25 0.131(6) 0.270(12) 0.082(4) -0.040(6) 0.066(4) -0.052(7)
 C26 0.088(3) 0.224(9) 0.063(3) -0.013(4) 0.030(3) -0.028(5)
 C27 0.0514(17) 0.079(3) 0.0541(19) 0.0059(17) 0.0127(15) -0.0103(17)
 C28 0.091(3) 0.129(5) 0.064(3) -0.015(3) 0.014(2) -0.031(3)
 C29 0.096(5) 0.248(12) 0.071(4) -0.009(5) -0.004(3) -0.052(6)
 C30 0.064(3) 0.252(12) 0.104(5) 0.070(7) -0.012(4) -0.019(5)
 C31 0.063(3) 0.184(8) 0.161(8) 0.053(6) 0.038(4) 0.030(4)
 C32 0.056(2) 0.117(4) 0.097(3) 0.002(3) 0.027(2) 0.012(2)
 C33 0.101(4) 0.170(6) 0.100(4) -0.004(4) 0.059(3) -0.050(4)
 C34 0.122(4) 0.107(4) 0.110(4) -0.044(4) 0.062(4) -0.008(4)
 C35 0.101(4) 0.146(5) 0.057(3) 0.009(3) 0.009(2) -0.023(4)
 C36 0.089(3) 0.069(3) 0.096(3) 0.030(2) 0.038(3) 0.022(2)
 C37 0.088(3) 0.052(2) 0.127(4) -0.013(2) 0.045(3) -0.011(2)
 C38 0.071(2) 0.071(3) 0.123(4) 0.007(3) 0.061(3) 0.002(2)
 C39 0.064(2) 0.0565(19) 0.063(2) 0.0152(16) 0.0281(17) 0.0038(16)
 C40 0.078(3) 0.086(3) 0.071(3) 0.009(2) 0.023(2) 0.009(2)
 C41 0.078(3) 0.123(5) 0.079(3) 0.030(3) 0.016(2) 0.012(3)
 C42 0.084(3) 0.108(4) 0.109(4) 0.046(4) 0.041(3) 0.034(3)
 C43 0.115(4) 0.082(4) 0.126(5) 0.017(3) 0.047(4) 0.040(3)
 C44 0.090(3) 0.066(3) 0.095(3) 0.005(2) 0.027(3) 0.022(2)
 C45 0.0544(18) 0.0480(17) 0.083(2) 0.0106(17) 0.0252(17) 0.0007(15)
 C46 0.062(2) 0.078(3) 0.103(3) 0.020(2) 0.029(2) -0.009(2)
 C47 0.064(3) 0.080(3) 0.136(5) 0.017(3) 0.017(3) -0.022(2)
 C48 0.073(3) 0.067(3) 0.121(5) -0.009(3) 0.003(3) -0.011(2)
 C49 0.091(3) 0.079(3) 0.096(4) -0.019(3) 0.023(3) -0.007(3)
 C50 0.070(2) 0.065(2) 0.087(3) -0.006(2) 0.029(2) -0.0106(19)
 O2 0.246(13) 0.126(7) 0.124(7) 0.036(6) 0.124(9) 0.017(8)
 C51 0.144(14) 0.23(2) 0.23(2) 0.13(2) 0.089(16) 0.018(16)
 C52 0.178(14) 0.115(9) 0.085(8) 0.027(7) 0.063(9) -0.004(10)
 C53 0.26(3) 0.52(8) 0.108(15) 0.10(3) 0.001(18) -0.08(4)
 C54 0.156(14) 0.21(2) 0.136(13) 0.002(14) 0.074(12) -0.067(15)
 C55 0.70(11) 0.13(2) 0.54(8) 0.12(3) 0.48(9) 0.10(4)
 C56 0.31(3) 0.36(4) 0.091(11) -0.024(17) 0.070(16) -0.21(3)

_geom_special_details
;
 All esds (except the esd in the dihedral angle between two l.s. planes)
 are estimated using the full covariance matrix.  The cell esds are taken
 into account individually in the estimation of esds in distances, angles
 and torsion angles; correlations between esds in cell parameters are only
 used when they are defined by crystal symmetry.  An approximate (isotropic)
 treatment of cell esds is used for estimating esds involving l.s. planes.
;
loop_
  _geom_bond_atom_site_label_1
  _geom_bond_atom_site_label_2
  _geom_bond_distance
  _geom_bond_site_symmetry_2
  _geom_bond_publ_flag
 P1 C17 1.849(3) . ?
 P1 C39 1.830(4) . ?
 P1 C45 1.838(4) . ?
 O1 C2 1.435(5) . ?
 O1 C3 1.368(4) . ?
 N1 C1 1.466(5) . ?
 N1 C3 1.271(5) . ?
 C1 H1 0.9800 . ?
 C1 C2 1.553(5) . ?
 C1 C21 1.506(5) . ?
 C2 H2 0.9800 . ?
 C2 C27 1.504(5) . ?
 C3 C4 1.480(5) . ?
 C4 C5 1.397(5) . ?
 C4 C9 1.407(5) . ?
 C5 H5 0.9300 . ?
 C5 C6 1.386(6) . ?
 C6 C7 1.383(7) . ?
 C6 C33 1.512(7) . ?
 C7 H7 0.9300 . ?
 C7 C8 1.384(6) . ?
 C8 C9 1.394(5) . ?
 C8 C12 1.513(6) . ?
 C9 C10 1.532(5) . ?
 C10 C11 1.547(5) . ?
 C10 C13 1.555(5) . ?
 C10 C16 1.531(4) . ?
 C11 H11A 0.9700 . ?
 C11 H11B 0.9700 . ?
 C11 C12 1.545(6) . ?
 C12 C34 1.550(8) . ?
 C12 C35 1.519(7) . ?
 C13 H13A 0.9700 . ?
 C13 H13B 0.9700 . ?
 C13 C14 1.542(5) . ?
 C14 C15 1.505(5) . ?
 C14 C36 1.537(6) . ?
 C14 C37 1.537(6) . ?
 C15 C16 1.398(5) . ?
 C15 C20 1.391(5) . ?
 C16 C17 1.402(5) . ?
 C17 C18 1.391(5) . ?
 C18 H18 0.9300 . ?
 C18 C19 1.388(5) . ?
 C19 C20 1.385(5) . ?
 C19 C38 1.509(5) . ?
 C20 H20 0.9300 . ?
 C21 C22 1.372(6) . ?
 C21 C26 1.373(7) . ?
 C22 H22 0.9300 . ?
 C22 C23 1.388(6) . ?
 C23 H23 0.9300 . ?
 C23 C24 1.350(10) . ?
 C24 H24 0.9300 . ?
 C24 C25 1.362(12) . ?
 C25 H25 0.9300 . ?
 C25 C26 1.394(10) . ?
 C26 H26 0.9300 . ?
 C27 C28 1.370(7) . ?
 C27 C32 1.363(7) . ?
 C28 H28 0.9300 . ?
 C28 C29 1.380(10) . ?
 C29 H29 0.9300 . ?
 C29 C30 1.349(15) . ?
 C30 H30 0.9300 . ?
 C30 C31 1.353(15) . ?
 C31 H31 0.9300 . ?
 C31 C32 1.393(9) . ?
 C32 H32 0.9300 . ?
 C33 H33A 0.9600 . ?
 C33 H33B 0.9600 . ?
 C33 H33C 0.9600 . ?
 C34 H34A 0.9600 . ?
 C34 H34B 0.9600 . ?
 C34 H34C 0.9600 . ?
 C35 H35A 0.9600 . ?
 C35 H35B 0.9600 . ?
 C35 H35C 0.9600 . ?
 C36 H36A 0.9600 . ?
 C36 H36B 0.9600 . ?
 C36 H36C 0.9600 . ?
 C37 H37A 0.9600 . ?
 C37 H37B 0.9600 . ?
 C37 H37C 0.9600 . ?
 C38 H38A 0.9600 . ?
 C38 H38B 0.9600 . ?
 C38 H38C 0.9600 . ?
 C39 C40 1.388(7) . ?
 C39 C44 1.374(7) . ?
 C40 H40 0.9300 . ?
 C40 C41 1.387(7) . ?
 C41 H41 0.9300 . ?
 C41 C42 1.369(10) . ?
 C42 H42 0.9300 . ?
 C42 C43 1.354(10) . ?
 C43 H43 0.9300 . ?
 C43 C44 1.402(8) . ?
 C44 H44 0.9300 . ?
 C45 C46 1.387(6) . ?
 C45 C50 1.372(7) . ?
 C46 H46 0.9300 . ?
 C46 C47 1.375(8) . ?
 C47 H47 0.9300 . ?
 C47 C48 1.361(10) . ?
 C48 H48 0.9300 . ?
 C48 C49 1.358(9) . ?
 C49 H49 0.9300 . ?
 C49 C50 1.403(7) . ?
 C50 H50 0.9300 . ?
 O2 C52 1.236(15) . ?
 O2 C54 1.149(19) . ?
 C51 H51A 0.9600 . ?
 C51 H51B 0.9600 . ?
 C51 H51C 0.9600 . ?
 C51 C52 1.51(3) . ?
 C52 H52 0.9800 . ?
 C52 C53 1.41(3) . ?
 C53 H53A 0.9600 . ?
 C53 H53B 0.9600 . ?
 C53 H53C 0.9600 . ?
 C54 H54 0.9800 . ?
 C54 C55 1.55(2) . ?
 C54 C56 1.442(19) . ?
 C55 H55A 0.9600 . ?
 C55 H55B 0.9600 . ?
 C55 H55C 0.9600 . ?
 C56 H56A 0.9600 . ?
 C56 H56B 0.9600 . ?
 C56 H56C 0.9600 . ?

loop_
  _geom_angle_atom_site_label_1
  _geom_angle_atom_site_label_2
  _geom_angle_atom_site_label_3
  _geom_angle
  _geom_angle_site_symmetry_1
  _geom_angle_site_symmetry_3
  _geom_angle_publ_flag
 C39 P1 C17 102.01(15) . . ?
 C39 P1 C45 102.73(18) . . ?
 C45 P1 C17 102.66(17) . . ?
 C3 O1 C2 106.9(3) . . ?
 C3 N1 C1 107.0(3) . . ?
 N1 C1 H1 108.4 . . ?
 N1 C1 C2 104.5(3) . . ?
 N1 C1 C21 114.8(3) . . ?
 C2 C1 H1 108.4 . . ?
 C21 C1 H1 108.4 . . ?
 C21 C1 C2 112.0(3) . . ?
 O1 C2 C1 103.3(3) . . ?
 O1 C2 H2 109.4 . . ?
 O1 C2 C27 109.5(3) . . ?
 C1 C2 H2 109.4 . . ?
 C27 C2 C1 115.5(3) . . ?
 C27 C2 H2 109.4 . . ?
 O1 C3 C4 113.6(3) . . ?
 N1 C3 O1 117.7(3) . . ?
 N1 C3 C4 128.6(3) . . ?
 C5 C4 C3 116.1(3) . . ?
 C5 C4 C9 118.5(3) . . ?
 C9 C4 C3 125.4(3) . . ?
 C4 C5 H5 118.4 . . ?
 C6 C5 C4 123.2(4) . . ?
 C6 C5 H5 118.4 . . ?
 C5 C6 C33 120.9(5) . . ?
 C7 C6 C5 117.7(4) . . ?
 C7 C6 C33 121.4(4) . . ?
 C6 C7 H7 119.8 . . ?
 C6 C7 C8 120.4(4) . . ?
 C8 C7 H7 119.8 . . ?
 C7 C8 C9 122.3(4) . . ?
 C7 C8 C12 125.1(4) . . ?
 C9 C8 C12 112.7(3) . . ?
 C4 C9 C10 131.8(3) . . ?
 C8 C9 C4 117.9(3) . . ?
 C8 C9 C10 110.3(3) . . ?
 C9 C10 C11 102.1(3) . . ?
 C9 C10 C13 112.8(3) . . ?
 C11 C10 C13 112.5(3) . . ?
 C16 C10 C9 120.1(3) . . ?
 C16 C10 C11 107.9(3) . . ?
 C16 C10 C13 101.8(3) . . ?
 C10 C11 H11A 110.0 . . ?
 C10 C11 H11B 110.0 . . ?
 H11A C11 H11B 108.4 . . ?
 C12 C11 C10 108.5(3) . . ?
 C12 C11 H11A 110.0 . . ?
 C12 C11 H11B 110.0 . . ?
 C8 C12 C11 101.4(3) . . ?
 C8 C12 C34 108.9(4) . . ?
 C8 C12 C35 113.7(4) . . ?
 C11 C12 C34 112.0(4) . . ?
 C35 C12 C11 111.2(4) . . ?
 C35 C12 C34 109.5(5) . . ?
 C10 C13 H13A 110.0 . . ?
 C10 C13 H13B 110.0 . . ?
 H13A C13 H13B 108.4 . . ?
 C14 C13 C10 108.3(3) . . ?
 C14 C13 H13A 110.0 . . ?
 C14 C13 H13B 110.0 . . ?
 C15 C14 C13 102.2(3) . . ?
 C15 C14 C36 111.8(4) . . ?
 C15 C14 C37 110.4(3) . . ?
 C36 C14 C13 110.7(3) . . ?
 C37 C14 C13 112.4(4) . . ?
 C37 C14 C36 109.3(4) . . ?
 C16 C15 C14 113.0(3) . . ?
 C20 C15 C14 126.6(3) . . ?
 C20 C15 C16 120.3(3) . . ?
 C15 C16 C10 109.8(3) . . ?
 C15 C16 C17 119.5(3) . . ?
 C17 C16 C10 130.0(3) . . ?
 C16 C17 P1 119.8(2) . . ?
 C18 C17 P1 121.8(3) . . ?
 C18 C17 C16 118.4(3) . . ?
 C17 C18 H18 118.7 . . ?
 C19 C18 C17 122.7(3) . . ?
 C19 C18 H18 118.7 . . ?
 C18 C19 C38 120.9(3) . . ?
 C20 C19 C18 118.1(3) . . ?
 C20 C19 C38 121.0(3) . . ?
 C15 C20 H20 119.5 . . ?
 C19 C20 C15 120.9(3) . . ?
 C19 C20 H20 119.5 . . ?
 C22 C21 C1 122.7(4) . . ?
 C22 C21 C26 118.2(4) . . ?
 C26 C21 C1 119.1(4) . . ?
 C21 C22 H22 119.5 . . ?
 C21 C22 C23 121.0(5) . . ?
 C23 C22 H22 119.5 . . ?
 C22 C23 H23 119.9 . . ?
 C24 C23 C22 120.2(6) . . ?
 C24 C23 H23 119.9 . . ?
 C23 C24 H24 120.0 . . ?
 C23 C24 C25 119.9(6) . . ?
 C25 C24 H24 120.0 . . ?
 C24 C25 H25 119.9 . . ?
 C24 C25 C26 120.1(6) . . ?
 C26 C25 H25 119.9 . . ?
 C21 C26 C25 120.4(6) . . ?
 C21 C26 H26 119.8 . . ?
 C25 C26 H26 119.8 . . ?
 C28 C27 C2 119.6(4) . . ?
 C32 C27 C2 120.6(4) . . ?
 C32 C27 C28 119.7(4) . . ?
 C27 C28 H28 119.5 . . ?
 C27 C28 C29 121.1(8) . . ?
 C29 C28 H28 119.5 . . ?
 C28 C29 H29 120.5 . . ?
 C30 C29 C28 119.0(7) . . ?
 C30 C29 H29 120.5 . . ?
 C29 C30 H30 119.7 . . ?
 C29 C30 C31 120.7(6) . . ?
 C31 C30 H30 119.7 . . ?
 C30 C31 H31 119.5 . . ?
 C30 C31 C32 121.0(8) . . ?
 C32 C31 H31 119.5 . . ?
 C27 C32 C31 118.6(7) . . ?
 C27 C32 H32 120.7 . . ?
 C31 C32 H32 120.7 . . ?
 C6 C33 H33A 109.5 . . ?
 C6 C33 H33B 109.5 . . ?
 C6 C33 H33C 109.5 . . ?
 H33A C33 H33B 109.5 . . ?
 H33A C33 H33C 109.5 . . ?
 H33B C33 H33C 109.5 . . ?
 C12 C34 H34A 109.5 . . ?
 C12 C34 H34B 109.5 . . ?
 C12 C34 H34C 109.5 . . ?
 H34A C34 H34B 109.5 . . ?
 H34A C34 H34C 109.5 . . ?
 H34B C34 H34C 109.5 . . ?
 C12 C35 H35A 109.5 . . ?
 C12 C35 H35B 109.5 . . ?
 C12 C35 H35C 109.5 . . ?
 H35A C35 H35B 109.5 . . ?
 H35A C35 H35C 109.5 . . ?
 H35B C35 H35C 109.5 . . ?
 C14 C36 H36A 109.5 . . ?
 C14 C36 H36B 109.5 . . ?
 C14 C36 H36C 109.5 . . ?
 H36A C36 H36B 109.5 . . ?
 H36A C36 H36C 109.5 . . ?
 H36B C36 H36C 109.5 . . ?
 C14 C37 H37A 109.5 . . ?
 C14 C37 H37B 109.5 . . ?
 C14 C37 H37C 109.5 . . ?
 H37A C37 H37B 109.5 . . ?
 H37A C37 H37C 109.5 . . ?
 H37B C37 H37C 109.5 . . ?
 C19 C38 H38A 109.5 . . ?
 C19 C38 H38B 109.5 . . ?
 C19 C38 H38C 109.5 . . ?
 H38A C38 H38B 109.5 . . ?
 H38A C38 H38C 109.5 . . ?
 H38B C38 H38C 109.5 . . ?
 C40 C39 P1 116.5(3) . . ?
 C44 C39 P1 126.1(3) . . ?
 C44 C39 C40 117.3(4) . . ?
 C39 C40 H40 119.0 . . ?
 C41 C40 C39 122.0(5) . . ?
 C41 C40 H40 119.0 . . ?
 C40 C41 H41 120.4 . . ?
 C42 C41 C40 119.3(6) . . ?
 C42 C41 H41 120.4 . . ?
 C41 C42 H42 119.9 . . ?
 C43 C42 C41 120.2(5) . . ?
 C43 C42 H42 119.9 . . ?
 C42 C43 H43 119.8 . . ?
 C42 C43 C44 120.5(6) . . ?
 C44 C43 H43 119.8 . . ?
 C39 C44 C43 120.8(5) . . ?
 C39 C44 H44 119.6 . . ?
 C43 C44 H44 119.6 . . ?
 C46 C45 P1 117.5(4) . . ?
 C50 C45 P1 124.7(3) . . ?
 C50 C45 C46 117.8(4) . . ?
 C45 C46 H46 119.4 . . ?
 C47 C46 C45 121.2(5) . . ?
 C47 C46 H46 119.4 . . ?
 C46 C47 H47 119.9 . . ?
 C48 C47 C46 120.2(5) . . ?
 C48 C47 H47 119.9 . . ?
 C47 C48 H48 119.9 . . ?
 C49 C48 C47 120.3(5) . . ?
 C49 C48 H48 119.9 . . ?
 C48 C49 H49 120.1 . . ?
 C48 C49 C50 119.7(6) . . ?
 C50 C49 H49 120.1 . . ?
 C45 C50 C49 120.8(5) . . ?
 C45 C50 H50 119.6 . . ?
 C49 C50 H50 119.6 . . ?
 C54 O2 C52 143.7(18) . . ?
 H51A C51 H51B 109.5 . . ?
 H51A C51 H51C 109.5 . . ?
 H51B C51 H51C 109.5 . . ?
 C52 C51 H51A 109.5 . . ?
 C52 C51 H51B 109.5 . . ?
 C52 C51 H51C 109.5 . . ?
 O2 C52 C51 118.8(18) . . ?
 O2 C52 H52 99.1 . . ?
 O2 C52 C53 116(2) . . ?
 C51 C52 H52 99.1 . . ?
 C53 C52 C51 118(2) . . ?
 C53 C52 H52 99.1 . . ?
 C52 C53 H53A 109.5 . . ?
 C52 C53 H53B 109.5 . . ?
 C52 C53 H53C 109.5 . . ?
 H53A C53 H53B 109.5 . . ?
 H53A C53 H53C 109.5 . . ?
 H53B C53 H53C 109.5 . . ?
 O2 C54 H54 96.3 . . ?
 O2 C54 C55 123(2) . . ?
 O2 C54 C56 131(2) . . ?
 C55 C54 H54 96.3 . . ?
 C56 C54 H54 96.3 . . ?
 C56 C54 C55 102(2) . . ?
 C54 C55 H55A 109.5 . . ?
 C54 C55 H55B 109.5 . . ?
 C54 C55 H55C 109.5 . . ?
 H55A C55 H55B 109.5 . . ?
 H55A C55 H55C 109.5 . . ?
 H55B C55 H55C 109.5 . . ?
 C54 C56 H56A 109.5 . . ?
 C54 C56 H56B 109.5 . . ?
 C54 C56 H56C 109.5 . . ?
 H56A C56 H56B 109.5 . . ?
 H56A C56 H56C 109.5 . . ?
 H56B C56 H56C 109.5 . . ?

_shelx_res_file
;
TITL 171012_swy_L7 in P21 #4
    171012_swy_l7.res
    created by SHELXL-2016/6 at 11:03:26 on 13-Oct-2017
REM reset to P21 #4
CELL 1.54184 11.68726 15.31342 14.6013 90 110.6311 90
ZERR 1 0.00026 0.00029 0.00039 0 0.0027 0
LATT -1
SYMM -X,0.5+Y,-Z
SFAC C H N O P
UNIT 106 110 2 3 2
DFIX 1.53 C56 C54 C55 C54
DANG 2.53 C56 C55

L.S. 99
PLAN  26
SIZE 0.48 0.46 0.36
TEMP 20
BOND $h
fmap 2
ACTA
OMIT 1 -1 1
OMIT 1 1 1
OMIT 0 -2 1
OMIT 0 2 1
OMIT 2 0 2
OMIT 0 0 1
OMIT -1 -4 2
OMIT 2 0 3
OMIT 1 -3 1
OMIT 0 0 2
OMIT -3 0 4
OMIT -1 4 2
OMIT 0 1 2
OMIT -1 -2 4
OMIT 1 0 0
OMIT -1 2 4
OMIT 0 -4 3
OMIT 1 0 3
OMIT 0 2 4
OMIT 0 2 0
OMIT 0 -1 2
OMIT 0 -2 4
OMIT -3 0 5
OMIT -2 0 1
REM <olex2.extras>
REM <HklSrc "%.\\171012_swy_L7.hkl">
REM </olex2.extras>

WGHT    0.112700    0.227500
FVAR       7.29309
P1    5    0.373526    0.112270    0.705599    11.00000    0.05907    0.05047 =
         0.06709    0.00948    0.02927    0.00260
O1    4   -0.025230    0.162126    0.449603    11.00000    0.06214    0.08169 =
         0.05298    0.00658    0.01129   -0.02102
N1    3    0.114991    0.266887    0.460417    11.00000    0.04897    0.06534 =
         0.05658   -0.00119    0.02127   -0.00358
C1    1    0.057391    0.248347    0.355592    11.00000    0.04822    0.06597 =
         0.05664    0.00558    0.01674    0.00143
AFIX  13
H1    2    0.007965    0.298992    0.323969    11.00000   -1.20000
AFIX   0
C2    1   -0.029928    0.170540    0.350476    11.00000    0.05357    0.06658 =
         0.05142   -0.00030    0.01597    0.00169
AFIX  13
H2    2    0.002972    0.117497    0.331423    11.00000   -1.20000
AFIX   0
C3    1    0.062633    0.218710    0.504706    11.00000    0.03955    0.05667 =
         0.05867    0.00215    0.01442    0.00037
C4    1    0.077662    0.218697    0.609700    11.00000    0.04064    0.05892 =
         0.05604    0.00481    0.01939    0.00662
C5    1   -0.008729    0.170952    0.634902    11.00000    0.04844    0.08196 =
         0.06663    0.00089    0.02379   -0.00622
AFIX  43
H5    2   -0.067551    0.139639    0.586114    11.00000   -1.20000
AFIX   0
C6    1   -0.011002    0.168002    0.729099    11.00000    0.06364    0.10053 =
         0.07443    0.00495    0.03574   -0.01331
C7    1    0.076682    0.215316    0.800665    11.00000    0.07483    0.10129 =
         0.06403    0.00151    0.03840   -0.00310
AFIX  43
H7    2    0.076285    0.216001    0.864241    11.00000   -1.20000
AFIX   0
C8    1    0.165041    0.261664    0.778210    11.00000    0.05829    0.06873 =
         0.05845   -0.00093    0.02628    0.00358
C9    1    0.169284    0.263654    0.684010    11.00000    0.04553    0.05315 =
         0.05424    0.00295    0.02190    0.00753
C10   1    0.277206    0.319434    0.681994    11.00000    0.04685    0.04950 =
         0.05561   -0.00174    0.01875    0.00336
C11   1    0.350624    0.332296    0.792244    11.00000    0.05733    0.06515 =
         0.05703   -0.00703    0.01650   -0.00363
AFIX  23
H11A  2    0.418375    0.291474    0.813498    11.00000   -1.20000
H11B  2    0.383381    0.391111    0.803987    11.00000   -1.20000
AFIX   0
C12   1    0.264204    0.316542    0.849883    11.00000    0.07023    0.08414 =
         0.05679   -0.00642    0.02382   -0.00557
C13   1    0.236195    0.407503    0.627209    11.00000    0.05868    0.05209 =
         0.07040    0.00292    0.02692    0.00931
AFIX  23
H13A  2    0.157852    0.400431    0.574879    11.00000   -1.20000
H13B  2    0.227557    0.451574    0.672050    11.00000   -1.20000
AFIX   0
C14   1    0.333982    0.435939    0.584805    11.00000    0.06276    0.04680 =
         0.07781    0.00793    0.02777    0.00359
C15   1    0.400892    0.351770    0.585616    11.00000    0.04861    0.04550 =
         0.06311    0.00174    0.01866   -0.00200
C16   1    0.364945    0.284142    0.633903    11.00000    0.04088    0.04697 =
         0.05151    0.00013    0.01668   -0.00214
C17   1    0.422299    0.202479    0.643526    11.00000    0.04386    0.04634 =
         0.05491    0.00373    0.01749    0.00011
C18   1    0.515735    0.192119    0.606197    11.00000    0.04639    0.04954 =
         0.06588    0.00218    0.02209    0.00255
AFIX  43
H18   2    0.554684    0.138269    0.613194    11.00000   -1.20000
AFIX   0
C19   1    0.553218    0.258862    0.558934    11.00000    0.04951    0.05750 =
         0.07227    0.00197    0.02919   -0.00394
C20   1    0.494206    0.338656    0.548705    11.00000    0.05499    0.05075 =
         0.07384    0.00730    0.02911   -0.00351
AFIX  43
H20   2    0.517311    0.384116    0.516697    11.00000   -1.20000
AFIX   0
C21   1    0.145392    0.228571    0.303850    11.00000    0.06368    0.08038 =
         0.06106    0.00091    0.02960   -0.00928
C22   1    0.267314    0.213064    0.352974    11.00000    0.06542    0.07104 =
         0.07408    0.00645    0.03361    0.00516
AFIX  43
H22   2    0.299390    0.219530    0.420616    11.00000   -1.20000
AFIX   0
C23   1    0.343539    0.187857    0.303197    11.00000    0.08522    0.08743 =
         0.12637    0.00479    0.06445    0.00681
AFIX  43
H23   2    0.426188    0.178209    0.337521    11.00000   -1.20000
AFIX   0
C24   1    0.298084    0.177300    0.205111    11.00000    0.13003    0.14224 =
         0.12604   -0.03679    0.09215   -0.03007
AFIX  43
H24   2    0.348727    0.158395    0.172228    11.00000   -1.20000
AFIX   0
C25   1    0.177957    0.194379    0.154401    11.00000    0.13060    0.26976 =
         0.08160   -0.03980    0.06629   -0.05153
AFIX  43
H25   2    0.146682    0.187343    0.086814    11.00000   -1.20000
AFIX   0
C26   1    0.101779    0.222390    0.203627    11.00000    0.08836    0.22361 =
         0.06283   -0.01259    0.03029   -0.02765
AFIX  43
H26   2    0.020938    0.236973    0.168352    11.00000   -1.20000
AFIX   0
C27   1   -0.160313    0.183213    0.283798    11.00000    0.05141    0.07860 =
         0.05407    0.00587    0.01269   -0.01032
C28   1   -0.204609    0.136892    0.198179    11.00000    0.09082    0.12887 =
         0.06378   -0.01521    0.01400   -0.03122
AFIX  43
H28   2   -0.154008    0.097171    0.182707    11.00000   -1.20000
AFIX   0
C29   1   -0.323106    0.148244    0.134544    11.00000    0.09647    0.24819 =
         0.07109   -0.00924   -0.00350   -0.05194
AFIX  43
H29   2   -0.352331    0.116722    0.076456    11.00000   -1.20000
AFIX   0
C30   1   -0.395913    0.205769    0.157887    11.00000    0.06449    0.25175 =
         0.10393    0.06977   -0.01152   -0.01872
AFIX  43
H30   2   -0.476038    0.213678    0.115656    11.00000   -1.20000
AFIX   0
C31   1   -0.353571    0.252051    0.242071    11.00000    0.06299    0.18401 =
         0.16105    0.05330    0.03784    0.03034
AFIX  43
H31   2   -0.404680    0.292010    0.256549    11.00000   -1.20000
AFIX   0
C32   1   -0.234484    0.240732    0.307425    11.00000    0.05619    0.11709 =
         0.09729    0.00226    0.02728    0.01223
AFIX  43
H32   2   -0.206239    0.271757    0.365893    11.00000   -1.20000
AFIX   0
C33   1   -0.106009    0.114549    0.752420    11.00000    0.10088    0.17008 =
         0.10005   -0.00381    0.05912   -0.05004
AFIX 137
H33A  2   -0.085589    0.111893    0.822062    11.00000   -1.50000
H33B  2   -0.107956    0.056530    0.727010    11.00000   -1.50000
H33C  2   -0.184816    0.141281    0.722997    11.00000   -1.50000
AFIX   0
C34   1    0.206810    0.402687    0.869152    11.00000    0.12187    0.10728 =
         0.10995   -0.04368    0.06163   -0.00761
AFIX 137
H34A  2    0.162586    0.430453    0.807922    11.00000   -1.50000
H34B  2    0.270368    0.440927    0.908233    11.00000   -1.50000
H34C  2    0.151926    0.390039    0.903236    11.00000   -1.50000
AFIX   0
C35   1    0.330454    0.270949    0.946539    11.00000    0.10143    0.14573 =
         0.05746    0.00905    0.00903   -0.02309
AFIX 137
H35A  2    0.274747    0.261725    0.980705    11.00000   -1.50000
H35B  2    0.397353    0.306619    0.985702    11.00000   -1.50000
H35C  2    0.361121    0.215697    0.934279    11.00000   -1.50000
AFIX   0
C36   1    0.273694    0.472088    0.480601    11.00000    0.08898    0.06894 =
         0.09577    0.03013    0.03800    0.02199
AFIX 137
H36A  2    0.335848    0.491534    0.456428    11.00000   -1.50000
H36B  2    0.221622    0.520276    0.481633    11.00000   -1.50000
H36C  2    0.225958    0.427032    0.438657    11.00000   -1.50000
AFIX   0
C37   1    0.421815    0.504788    0.648799    11.00000    0.08812    0.05189 =
         0.12671   -0.01326    0.04462   -0.01136
AFIX 137
H37A  2    0.455912    0.483822    0.714868    11.00000   -1.50000
H37B  2    0.377956    0.558049    0.647528    11.00000   -1.50000
H37C  2    0.486434    0.515495    0.623971    11.00000   -1.50000
AFIX   0
C38   1    0.656387    0.245163    0.520972    11.00000    0.07121    0.07110 =
         0.12288    0.00712    0.06092    0.00227
AFIX 137
H38A  2    0.732293    0.261790    0.570407    11.00000   -1.50000
H38B  2    0.642679    0.280274    0.463615    11.00000   -1.50000
H38C  2    0.659836    0.184708    0.504740    11.00000   -1.50000
AFIX   0
C39   1    0.513762    0.047715    0.754841    11.00000    0.06440    0.05654 =
         0.06268    0.01523    0.02811    0.00383
C40   1    0.601068    0.077873    0.840823    11.00000    0.07784    0.08631 =
         0.07066    0.00872    0.02342    0.00864
AFIX  43
H40   2    0.586902    0.129928    0.867872    11.00000   -1.20000
AFIX   0
C41   1    0.708770    0.032694    0.887580    11.00000    0.07828    0.12259 =
         0.07852    0.02993    0.01603    0.01249
AFIX  43
H41   2    0.765799    0.054180    0.945185    11.00000   -1.20000
AFIX   0
C42   1    0.730191   -0.043908    0.847968    11.00000    0.08361    0.10775 =
         0.10861    0.04608    0.04053    0.03397
AFIX  43
H42   2    0.801995   -0.074797    0.878906    11.00000   -1.20000
AFIX   0
C43   1    0.647157   -0.074805    0.763909    11.00000    0.11467    0.08205 =
         0.12594    0.01681    0.04675    0.03984
AFIX  43
H43   2    0.662790   -0.126434    0.736889    11.00000   -1.20000
AFIX   0
C44   1    0.537796   -0.029526    0.717319    11.00000    0.08960    0.06648 =
         0.09452    0.00523    0.02669    0.02183
AFIX  43
H44   2    0.480810   -0.052055    0.660305    11.00000   -1.20000
AFIX   0
C45   1    0.278162    0.045182    0.602572    11.00000    0.05436    0.04799 =
         0.08253    0.01060    0.02523    0.00071
C46   1    0.182164   -0.000624    0.614800    11.00000    0.06178    0.07793 =
         0.10274    0.01965    0.02857   -0.00870
AFIX  43
H46   2    0.168343    0.004072    0.673554    11.00000   -1.20000
AFIX   0
C47   1    0.107069   -0.052843    0.541637    11.00000    0.06387    0.08028 =
         0.13568    0.01681    0.01722   -0.02222
AFIX  43
H47   2    0.044898   -0.084565    0.552050    11.00000   -1.20000
AFIX   0
C48   1    0.123422   -0.058264    0.454021    11.00000    0.07321    0.06656 =
         0.12055   -0.00870    0.00343   -0.01148
AFIX  43
H48   2    0.071077   -0.092521    0.404209    11.00000   -1.20000
AFIX   0
C49   1    0.215833   -0.013866    0.439044    11.00000    0.09124    0.07920 =
         0.09616   -0.01923    0.02300   -0.00730
AFIX  43
H49   2    0.227260   -0.018008    0.379301    11.00000   -1.20000
AFIX   0
C50   1    0.294032    0.038301    0.514112    11.00000    0.06996    0.06511 =
         0.08743   -0.00597    0.02929   -0.01064
AFIX  43
H50   2    0.357394    0.068584    0.503780    11.00000   -1.20000
AFIX   0

O2    4    0.235915   -0.071771    1.043516    10.50000    0.24557    0.12570 =
         0.12425    0.03642    0.12406    0.01703
C51   1    0.388694   -0.015743    0.988275    10.50000    0.14419    0.23042 =
         0.22833    0.12516    0.08905    0.01799
AFIX 137
H51A  2    0.372064    0.040641    0.957687    10.50000   -1.50000
H51B  2    0.437009   -0.049297    0.959775    10.50000   -1.50000
H51C  2    0.432680   -0.008796    1.057107    10.50000   -1.50000
AFIX   0
C52   1    0.269969   -0.062466    0.972984    10.50000    0.17837    0.11487 =
         0.08486    0.02666    0.06304   -0.00389
AFIX  13
H52   2    0.296289   -0.122440    0.967770    10.50000   -1.20000
AFIX   0
C53   1    0.176949   -0.055075    0.880659    10.50000    0.26052    0.51520 =
         0.10773    0.09923    0.00099   -0.07752
AFIX 137
H53A  2    0.145306    0.003399    0.871968    10.50000   -1.50000
H53B  2    0.112379   -0.095355    0.876540    10.50000   -1.50000
H53C  2    0.209687   -0.068225    0.830469    10.50000   -1.50000
AFIX   0
C54   1    0.219347   -0.122575    1.095437    10.50000    0.15607    0.20623 =
         0.13597    0.00243    0.07434   -0.06668
AFIX  13
H54   2    0.130790   -0.113773    1.074812    10.50000   -1.20000
AFIX   0
C55   1    0.214005   -0.222413    1.075654    10.50000    0.69695    0.13012 =
         0.53510    0.11768    0.47528    0.09663
AFIX 137
H55A  2    0.131680   -0.242738    1.060514    10.50000   -1.50000
H55B  2    0.266945   -0.252107    1.132776    10.50000   -1.50000
H55C  2    0.240088   -0.234105    1.021442    10.50000   -1.50000
AFIX   0
C56   1    0.243100   -0.119163    1.199229    10.50000    0.30890    0.35544 =
         0.09071   -0.02390    0.07022   -0.20609
AFIX 137
H56A  2    0.310789   -0.080797    1.229839    10.50000   -1.50000
H56B  2    0.262405   -0.176653    1.226541    10.50000   -1.50000
H56C  2    0.171918   -0.097767    1.210394    10.50000   -1.50000
AFIX   0
HKLF 4


REM  171012_swy_L7 in P21 #4
REM R1 =  0.0585 for    7792 Fo > 4sig(Fo)  and  0.0637 for all    8562 data
REM    551 parameters refined using      4 restraints

END

WGHT      0.1127      0.2275

REM Highest difference peak  0.447,  deepest hole -0.239,  1-sigma level  0.053
Q1    1   0.3352  0.1207  0.7837  11.00000  0.05    0.45
Q2    1   0.1182 -0.0644  1.1404  11.00000  0.05    0.32
Q3    1   0.1920 -0.0964  1.0218  11.00000  0.05    0.32
Q4    1   0.2777 -0.1620  1.1777  11.00000  0.05    0.30
Q5    1   0.2371 -0.0947  1.1322  11.00000  0.05    0.25
Q6    1   0.2338 -0.0746  0.8799  11.00000  0.05    0.20
Q7    1   0.7021  0.3010  0.5243  11.00000  0.05    0.19
Q8    1   0.1275 -0.0572  0.8588  11.00000  0.05    0.18
Q9    1   0.2152  0.0304  0.9373  11.00000  0.05    0.18
Q10   1  -0.1870  0.0753  0.6805  11.00000  0.05    0.17
Q11   1   0.3304  0.0120  0.9606  11.00000  0.05    0.16
Q12   1  -0.1426  0.0498  0.8423  11.00000  0.05    0.16
Q13   1   0.8077  0.0271  0.8201  11.00000  0.05    0.15
Q14   1  -0.2801  0.1260  0.7362  11.00000  0.05    0.14
Q15   1   0.7642  0.0417  0.9833  11.00000  0.05    0.14
Q16   1   0.4470  0.0641  0.7133  11.00000  0.05    0.14
Q17   1   0.2462 -0.0432  1.2718  11.00000  0.05    0.14
Q18   1   0.1161 -0.1059  0.3582  11.00000  0.05    0.14
Q19   1   0.8135  0.0212  0.8779  11.00000  0.05    0.13
Q20   1   0.7021  0.1448  0.8020  11.00000  0.05    0.13
Q21   1   0.3477  0.6455  0.6150  11.00000  0.05    0.13
Q22   1   0.0495 -0.0178  0.3776  11.00000  0.05    0.13
Q23   1  -0.0587  0.0546  0.8091  11.00000  0.05    0.13
Q24   1  -0.1378  0.1721  0.7985  11.00000  0.05    0.13
Q25   1   0.2754 -0.0244  0.5004  11.00000  0.05    0.13
Q26   1   0.2951 -0.0430  0.3787  11.00000  0.05    0.12
;
_shelx_res_checksum               67374
_shelx_hkl_file
;
   0 -18   0 2560.36 212.606   5
   0 -18   1 682.849 129.260   5
   0 -18   2 191.167 81.9643   5
   0 -17   0 58.4294 101.662   5
   0 -17   0-27.1582 89.2352  28
   0 -17  -1 1267.05 205.092  28
   0 -17   1 1505.62 207.108   5
   0 -17   1 1643.20 195.202  28
   0 -17  -1 1351.93 187.894   5
   0 -17  -2 135.499 113.308  28
   0 -17  -2 159.389 77.0912   5
   0 -17   2 252.357 112.841   5
   0 -17  -3 575.091 160.877  28
   0 -17   3 332.541 122.184   5
   0 -17  -4 662.470 158.114  28
   0 -17   4 421.250 115.459   5
   0 -17   5 22.2599 75.1458   5
   0 -17  -5 117.896 89.2634  28
   0 -16   0 971.815 193.237  28
   0 -16   0 830.755 183.442   5
   0 -16  -1 407.590 144.026  28
   0 -16  -1 551.131 152.805   5
   0 -16   1 409.925 121.866  28
   0 -16   1 544.239 158.657   5
   0 -16  -2 1639.54 213.880   5
   0 -16  -2 1765.69 264.920  28
   0 -16   2 1572.41 233.216   5
   0 -16  -3 1944.13 279.014  28
   0 -16   3 2125.48 264.173   5
   0 -16  -4 757.622 193.381  28
   0 -16   4 879.705 172.627   5
   0 -16   5 950.933 164.876   5
   0 -16  -5 948.566 201.860  28
   0 -16   6 511.871 118.311   5
   0 -16  -6 501.310 147.136  28
   0 -16   7 845.368 120.079   5
   0 -16  -7 713.985 156.755  28
   0 -15   0 15.7640 114.392   5
   0 -15   0-107.176 139.662  28
   0 -15  -1 1635.80 241.334   5
   0 -15  -1 1605.63 265.138  28
   0 -15   1 1475.92 231.276  28
   0 -15   1 1684.62 246.452  24
   0 -15   1 1461.95 241.511   5
   0 -15   2 92.2338 96.4459  24
   0 -15   2 200.650 148.808   5
   0 -15  -2 206.493 122.035   5
   0 -15  -2 176.574 149.677  28
   0 -15   2 169.993 125.267  28
   0 -15   3 2139.32 274.262   5
   0 -15  -3 1299.84 189.879   5
   0 -15   3 2139.53 263.266  24
   0 -15  -3 2011.67 298.609  28
   0 -15  -4 1301.76 263.346  28
   0 -15   4 968.250 176.002  24
   0 -15   4 1462.47 223.029   5
   0 -15   5 952.394 169.262  24
   0 -15   5 1324.60 203.378   5
   0 -15  -5 1298.32 248.239  28
   0 -15  -6 3759.32 368.529  28
   0 -15   6 3850.31 307.468   5
   0 -15   6 2632.13 259.042  24
   0 -15   6 2394.43 233.130   6
   0 -15   7-199.984 83.8826   6
   0 -15   7 72.9467 73.9327   5
   0 -15  -7-131.108 134.005  28
   0 -15   8 690.534 126.412   6
   0 -15  -8 775.746 166.118  28
   0 -14   0 15010.4 717.071  24
   0 -14   0 13059.4 681.267  28
   0 -14   0 14151.0 682.585   5
   0 -14  -1 1358.50 258.407  28
   0 -14   1 1518.67 254.827  24
   0 -14   1 1053.70 212.073  28
   0 -14  -1 1249.99 219.679   5
   0 -14  -1 1185.22 210.708  24
   0 -14   1 1147.00 227.179   5
   0 -14   2 5871.95 454.628   5
   0 -14  -2 5246.51 403.972   5
   0 -14   2 4949.89 397.831  28
   0 -14   2 5671.98 465.182  24
   0 -14  -2 5321.28 459.076  28
   0 -14  -2 5583.59 438.658  24
   0 -14   3 799.736 195.763  24
   0 -14  -3 528.502 141.962   5
   0 -14  -3 780.516 184.642  24
   0 -14   3 965.873 207.789   5
   0 -14  -3 906.354 232.782  28
   0 -14   4 3219.35 342.670  24
   0 -14  -4 3808.17 362.891  24
   0 -14  -4 3962.88 423.792  28
   0 -14   4 3839.45 358.397   5
   0 -14   5 7889.79 520.179  24
   0 -14   5 11116.4 563.864   5
   0 -14   5 8501.58 473.336   6
   0 -14  -5 11029.1 591.772  24
   0 -14  -5 10784.5 666.890  28
   0 -14   6 970.614 193.934  24
   0 -14   6 1141.57 189.540   6
   0 -14  -6 1389.71 264.818  28
   0 -14   6 1193.50 195.587   5
   0 -14   7 2172.32 233.252   5
   0 -14  -7 2593.40 315.845  28
   0 -14   7 2465.36 261.354   6
   0 -14   8 429.687 109.582   5
   0 -14  -8 512.382 155.565  28
   0 -14   8 654.178 152.551   6
   0 -14   9-42.7983 87.1357   6
   0 -14  -9-130.117 94.8762  28
   0 -14  10 552.484 116.748   6
   0 -13   0-62.9595 121.109  24
   0 -13   0-123.175 139.997  28
   0 -13   0-59.6007 137.186   5
   0 -13   1 15763.2 716.384  28
   0 -13  -1 13104.7 663.036  24
   0 -13  -1 15984.1 692.957   5
   0 -13   1 12874.7 667.898  24
   0 -13   1 17696.7 746.967   5
   0 -13  -1 14550.2 719.197  28
   0 -13  -2 14687.1 647.427   5
   0 -13  -2 11499.8 625.322  24
   0 -13   2 16343.9 743.834  27
   0 -13   2 15366.6 691.317   5
   0 -13  -2 14990.6 746.140  28
   0 -13   2 14689.4 667.213  28
   0 -13   2 11969.3 656.994  24
   0 -13   3 1533.53 257.452  27
   0 -13  -3 1035.78 179.316   5
   0 -13  -3 1027.49 200.726  24
   0 -13   3 1225.84 237.959  24
   0 -13  -3 1400.45 266.452  28
   0 -13   3 1257.46 217.512   5
   0 -13   4 295.099 115.163   6
   0 -13   4 249.629 126.713   5
   0 -13  -4 183.673 103.602   5
   0 -13  -4 155.721 151.754  28
   0 -13   4 254.021 145.222  27
   0 -13  -4 107.699 107.592  24
   0 -13   5 1430.09 222.881   5
   0 -13  -5 1498.48 281.284  28
   0 -13  -5 1736.06 260.687  24
   0 -13   5 1840.66 273.084  27
   0 -13   5 1733.08 231.685   6
   0 -13   6 3690.26 362.218  27
   0 -13   6 3106.94 300.882   5
   0 -13   6 3392.05 325.929   6
   0 -13  -6 3513.79 389.482  28
   0 -13  -6 3646.74 361.990  24
   0 -13  -7 2200.99 306.064  28
   0 -13  -7 2016.51 271.046  24
   0 -13   7 2243.36 245.877   5
   0 -13   7 2405.93 288.387  27
   0 -13   7 2339.07 274.777   6
   0 -13   8 210.023 119.195   6
   0 -13  -8 354.787 136.591  24
   0 -13  -8 83.5146 115.413  28
   0 -13   8 139.286 79.8120   5
   0 -13   8 171.224 101.241  27
   0 -13   9 1076.83 180.941   6
   0 -13  -9 1081.28 189.329  28
   0 -13  10 515.940 128.469   6
   0 -13  11 123.860 73.0704   6
   0 -12   0 12581.8 635.067  28
   0 -12   0 12917.9 603.014   5
   0 -12  -1 4215.25 382.328  28
   0 -12  -1 4297.98 349.353   5
   0 -12  -1 3036.35 454.420  18
   0 -12   1 4440.30 376.795  27
   0 -12   1 4333.11 367.497  28
   0 -12  -1 3244.09 324.473  24
   0 -12   1 4369.78 362.474   5
   0 -12   1 3887.73 496.080  18
   0 -12   1 3469.40 344.421  24
   0 -12  -2 234.603 131.490  28
   0 -12  -2-74.7253 71.1940  24
   0 -12   2 353.349 128.997  27
   0 -12   2 256.772 142.545  24
   0 -12   2 126.706 102.264   5
   0 -12  -2 249.824 102.203   5
   0 -12   2 211.456 118.693  28
   0 -12  -3 3587.65 347.575  24
   0 -12   3 3097.23 275.716   6
   0 -12  -3 2256.83 389.532  18
   0 -12  -3 4425.45 333.884   5
   0 -12   3 4279.52 358.482   5
   0 -12   3 4891.40 405.546  27
   0 -12  -3 4283.62 409.127  28
   0 -12  -4 255.061 116.324  24
   0 -12   4 655.198 159.558   6
   0 -12  -4 140.147 100.321   5
   0 -12   4 122.133 129.719   5
   0 -12  -4 185.392 150.529  28
   0 -12   4 164.171 125.754  27
   0 -12  -4 681.513 222.232  18
   0 -12   5 1853.33 264.313  27
   0 -12   5 1460.09 216.974   6
   0 -12   5 1622.33 227.937   5
   0 -12  -5 1432.26 243.586  24
   0 -12  -5 1252.04 310.022  18
   0 -12  -5 1743.46 293.261  28
   0 -12   6 1780.46 224.897   5
   0 -12  -6 1836.30 297.288  28
   0 -12   6 1934.99 251.196   6
   0 -12   6 1959.78 266.867  27
   0 -12  -6 1246.69 214.654  24
   0 -12  -7 1253.21 235.544  24
   0 -12   7 1687.15 216.022   5
   0 -12  -7 1507.59 266.431  28
   0 -12   7 1667.76 247.877  27
   0 -12   7 1708.37 247.536   6
   0 -12   8 3998.40 359.148   6
   0 -12  -8 3104.74 352.288  24
   0 -12   8 3665.96 291.871   5
   0 -12  -8 3682.29 373.073  28
   0 -12   8 3659.65 334.989  27
   0 -12   9 3695.24 335.850   6
   0 -12  -9 3290.24 330.146  28
   0 -12   9 3264.70 305.328  27
   0 -12  10 2328.53 258.460   6
   0 -12 -10 1426.30 219.581  24
   0 -12  11 240.347 101.470   6
   0 -12  12 607.330 115.105   6
   0 -11   0-11.8753 80.5953   5
   0 -11   0-31.6111 94.6654  28
   0 -11   0-145.458 128.814  18
   0 -11   0 276.097 93.2583  27
   0 -11   0-87.6232 98.4093  24
   0 -11  -1 7596.89 431.631   5
   0 -11  -1 5127.02 390.345  24
   0 -11   1 7479.69 454.498  27
   0 -11  -1 6765.10 624.182  18
   0 -11   1 7189.17 443.916  28
   0 -11   1 5356.93 563.843  18
   0 -11  -1 6979.03 459.088  28
   0 -11   1 5646.91 422.061  24
   0 -11   1 7628.56 440.648   5
   0 -11   2 1291.28 291.020  18
   0 -11   2 1660.72 218.473   5
   0 -11   2 1995.72 250.008  27
   0 -11  -2 1820.90 248.567  28
   0 -11   2 1837.01 226.849  28
   0 -11  -2 1707.34 345.926  18
   0 -11  -2 1227.29 200.162  24
   0 -11  -2 1704.26 210.453   5
   0 -11   3 781.718 155.275  28
   0 -11   3 775.774 140.672   6
   0 -11  -3 969.308 202.729  28
   0 -11   3 837.446 255.645  18
   0 -11   3 811.367 177.689  27
   0 -11  -3 420.672 187.414  18
   0 -11  -3 568.657 123.364   5
   0 -11  -3 721.729 154.598  24
   0 -11   3 945.471 166.855   5
   0 -11   4 8102.29 450.221   5
   0 -11   4 8866.52 518.212  27
   0 -11  -4 7862.44 529.237  28
   0 -11  -4 6370.39 440.933  24
   0 -11  -4 7830.40 719.251  18
   0 -11  -4 6692.43 374.075   5
   0 -11   4 8415.39 456.567   6
   0 -11  -5 1667.50 359.096  18
   0 -11  -5 1352.86 235.887  28
   0 -11   5 1286.75 203.296   6
   0 -11   5 1060.44 179.203   5
   0 -11   5 1278.65 220.090  27
   0 -11  -5 1417.19 236.706  24
   0 -11  -6 2095.83 287.120  24
   0 -11   6 1889.47 226.811   5
   0 -11  -6 2006.60 290.595  28
   0 -11  -6 1785.60 353.507  18
   0 -11   6 1998.74 261.144  27
   0 -11   6 1783.17 241.039   6
   0 -11  -7 315.871 149.791  28
   0 -11  -7 307.605 165.394  24
   0 -11   7 364.702 114.460   5
   0 -11   7 370.135 139.933   6
   0 -11   7 290.794 130.792  27
   0 -11  -8 240.129 148.619  28
   0 -11   8 132.087 102.662  27
   0 -11   8 31.9475 73.2446   5
   0 -11   8 33.7839 107.422   6
   0 -11  -8 258.340 148.735  24
   0 -11  -9 1372.39 223.101  28
   0 -11   9 2835.12 311.205   6
   0 -11   9 1885.30 235.450  27
   0 -11  -9 2450.70 324.282  24
   0 -11 -10 1151.15 219.338  24
   0 -11  10 1376.13 189.132  27
   0 -11  10 1566.79 236.516   6
   0 -11 -11 584.376 159.193  24
   0 -11  11 1254.99 202.129   6
   0 -11 -12 121.061 76.2693  24
   0 -11  12 156.258 92.6650   6
   0 -10   0 8744.23 432.934  27
   0 -10   0 9033.48 436.107   5
   0 -10   0 8203.01 450.821  28
   0 -10  -1 4513.87 488.972  18
   0 -10   1 5087.11 331.930   5
   0 -10  -1 4964.61 328.372   5
   0 -10   1 5052.84 342.180  27
   0 -10  -1 4602.42 307.880  27
   0 -10   1 4502.28 330.297  28
   0 -10  -1 4825.26 357.700  28
   0 -10  -1 5193.31 342.754  29
   0 -10   1 4311.80 481.457  18
   0 -10  -1 3282.32 288.077  24
   0 -10   2 17637.4 633.460  28
   0 -10   2 17645.4 555.873   6
   0 -10   2 18160.0 669.376  27
   0 -10   2 17073.4 604.040   5
   0 -10  -2 17631.2 595.691   5
   0 -10  -2 16371.1 928.243  18
   0 -10  -2 16696.6 674.852  28
   0 -10   2 16474.5 977.500  18
   0 -10  -3 18994.5 601.423   5
   0 -10   3 25556.7 727.608  28
   0 -10   3 30402.9 873.537  27
   0 -10   3 19267.6 1091.15  18
   0 -10   3 19301.9 621.448   6
   0 -10  -3 26695.6 1219.84  18
   0 -10  -3 26861.6 877.019  28
   0 -10  -3 19915.3 710.601  24
   0 -10   4 14714.2 623.653  27
   0 -10  -4 12843.5 480.017   5
   0 -10   4 13383.7 538.215   5
   0 -10   4 9471.82 800.555  18
   0 -10  -4 11170.7 970.028   1
   0 -10  -4 13064.4 882.578  18
   0 -10  -4 13299.8 647.818  28
   0 -10  -4 10864.0 539.749  24
   0 -10   4 13921.2 550.992   6
   0 -10  -5 1610.76 243.406  28
   0 -10  -5 1354.03 375.283   1
   0 -10  -5 1620.95 335.060  18
   0 -10   5 1492.75 205.563   6
   0 -10   5 1761.43 204.343   5
   0 -10  -5 2083.88 254.538  24
   0 -10   5 1717.76 234.102  27
   0 -10  -6 4850.33 722.573   1
   0 -10   6 6763.73 425.953   6
   0 -10  -6 6552.54 468.986  24
   0 -10   6 5761.37 360.355   5
   0 -10  -6 6454.10 666.248  18
   0 -10  -6 6017.83 463.989  28
   0 -10   6 6398.28 430.549  27
   0 -10  -7-78.5676 144.282  28
   0 -10  -7-311.264 150.555  24
   0 -10   7 19.8867 115.195   6
   0 -10  -7-232.164 168.661  18
   0 -10   7-21.2667 75.3859  27
   0 -10   7-25.6626 67.1175   5
   0 -10   8 1824.90 236.374  27
   0 -10   8 1787.39 247.074   6
   0 -10  -8 2048.36 288.356  28
   0 -10  -8 1925.78 295.652  24
   0 -10  -9 5007.21 411.292  28
   0 -10   9 4357.89 352.952  27
   0 -10   9 6031.88 441.767   6
   0 -10  -9 6034.16 500.268  24
   0 -10  10 6842.85 463.899   6
   0 -10 -10 5971.98 498.378  24
   0 -10  11 1594.88 231.289   6
   0 -10 -11 1313.54 245.401  24
   0 -10  12 542.725 138.265   6
   0 -10 -12 420.012 150.762  24
   0 -10  13 132.436 81.9473   6
   0  -9   0 106.123 75.5646  28
   0  -9   0 23.9266 70.5154   5
   0  -9   0 5.12088 81.7244  18
   0  -9   0 8.61123 43.3197  29
   0  -9   0 35.9249 46.4770  27
   0  -9  -1 4851.40 327.529  28
   0  -9  -1 4655.88 463.345  18
   0  -9  -1 3660.32 253.420   5
   0  -9   1 4760.30 486.339  18
   0  -9   1 5911.58 338.825  27
   0  -9   1 6417.14 359.140  29
   0  -9  -1 5364.40 312.731  29
   0  -9  -2 5236.18 504.553  18
   0  -9   2 6535.96 369.751  27
   0  -9  -2 5775.76 376.143  28
   0  -9  -2 5349.79 338.748  24
   0  -9   2 5878.45 555.239  18
   0  -9  -2 4850.87 288.210   5
   0  -9  -3 3544.29 428.416  18
   0  -9   3 3295.91 274.565  27
   0  -9  -3 2144.27 215.477  24
   0  -9  -3 3171.76 228.798   5
   0  -9  -3 2232.36 397.733   1
   0  -9  -3 3016.70 282.719  28
   0  -9   3 2129.81 199.526   6
   0  -9   4 2128.57 213.519   6
   0  -9  -4 1750.41 206.322  24
   0  -9  -4 1880.35 332.097  18
   0  -9   4 2261.29 238.568  27
   0  -9  -4 1985.44 415.132   1
   0  -9  -4 2189.36 256.797  28
   0  -9  -5 21996.6 810.386  28
   0  -9   5 24314.9 768.998  27
   0  -9  -5 20555.1 1379.28   1
   0  -9  -5 24672.2 1197.29  18
   0  -9   5 25001.0 729.909   6
   0  -9  -5 22896.0 771.497  24
   0  -9   6 15340.4 624.002  27
   0  -9  -6 16620.7 1033.46  18
   0  -9  -6 14611.5 1197.44   1
   0  -9   6 17625.4 1248.55  19
   0  -9   6 15435.6 602.403   6
   0  -9  -6 15545.9 674.597  24
   0  -9  -6 13883.4 668.580  28
   0  -9  -7 3811.12 362.195  24
   0  -9   7 3932.65 329.271   6
   0  -9  -7 2674.95 555.448   1
   0  -9  -7 3840.95 366.779  28
   0  -9   7 3942.29 589.722  19
   0  -9   7 2302.79 216.627   5
   0  -9  -7 4097.98 549.221  18
   0  -9   7 3425.72 308.380  27
   0  -9  -8 850.319 188.208  28
   0  -9   8 657.876 244.668  19
   0  -9   8 779.107 158.493  23
   0  -9  -8 868.461 221.521  24
   0  -9   8 707.575 169.195   6
   0  -9   8 621.671 153.442  27
   0  -9  -8 944.964 326.357  18
   0  -9  -8 728.137 284.318   1
   0  -9   9 6649.13 453.504   6
   0  -9   9 6930.50 473.338  23
   0  -9   9 5432.37 379.223  27
   0  -9  -9 6775.21 537.647  24
   0  -9  -9 5971.37 433.342  28
   0  -9  10 1625.11 247.082   6
   0  -9 -10 929.408 244.697  24
   0  -9  10 1057.64 205.436  23
   0  -9  10 903.509 160.426  27
   0  -9  11 1816.85 256.200   6
   0  -9 -11 1408.13 254.755  13
   0  -9  11 1106.74 192.881  23
   0  -9 -11 1639.13 285.351  24
   0  -9  12-166.946 91.3792  23
   0  -9  12 67.9003 100.868   6
   0  -9 -12-88.5059 92.8949  13
   0  -9 -12 22.5072 137.615  24
   0  -9  13 381.863 99.3153  23
   0  -9 -13 542.497 153.583  24
   0  -9  13 394.432 105.960   6
   0  -8   0 5378.28 469.585  18
   0  -8   1 4719.11 458.166  18
   0  -8   1 5985.71 421.508  32
   0  -8  -1 4737.78 442.141  18
   0  -8  -2 5581.72 484.717  18
   0  -8  -2 5003.83 516.485   1
   0  -8   2 5619.06 450.660  32
   0  -8  -3 4170.20 516.781   1
   0  -8   3 4652.17 297.579  27
   0  -8  -3 4306.97 445.233  18
   0  -8   3 4834.97 454.866  32
   0  -8  -3 4385.35 312.520  28
   0  -8   4 12389.0 769.762  32
   0  -8   4 13055.3 957.966  19
   0  -8   4 8588.66 384.632   6
   0  -8  -4 9408.41 432.468  24
   0  -8  -4 9865.89 703.287  18
   0  -8  -4 9710.33 845.567   1
   0  -8   4 10246.4 460.544  27
   0  -8  -4 8747.67 458.588  28
   0  -8  -5 10301.1 748.376  18
   0  -8   5 12628.1 970.977  19
   0  -8  -5 10057.8 514.321  28
   0  -8  -5 7257.01 408.979  24
   0  -8   5 10289.3 446.156   6
   0  -8   5 8672.79 695.151  32
   0  -8  -5 10225.8 930.324   1
   0  -8   5 10505.4 472.203  27
   0  -8  -6 6722.18 638.551  18
   0  -8  -6 5807.44 742.265   1
   0  -8   6 6876.67 394.984  27
   0  -8   6 6828.19 385.830   6
   0  -8   6 7360.84 687.243  32
   0  -8  -6 6204.47 409.354  24
   0  -8   6 6950.98 400.895  23
   0  -8  -6 6633.12 435.962  28
   0  -8   6 7005.88 751.956  19
   0  -8  -7 4000.52 355.304  24
   0  -8   7 5224.71 615.906  32
   0  -8  -7 4720.93 572.450  18
   0  -8  -7 3621.80 621.471   1
   0  -8   7 4018.34 313.959  27
   0  -8  -7 3193.15 291.127  12
   0  -8   7 2740.05 270.037  23
   0  -8   7 4697.47 608.518  19
   0  -8   7 4265.46 325.151   6
   0  -8  -7 3468.32 330.377  28
   0  -8   8 6542.03 437.064  23
   0  -8   8 5520.26 637.441  32
   0  -8   8 7571.19 435.832  27
   0  -8   8 8776.96 486.426   6
   0  -8  -8 8839.39 559.990  24
   0  -8   8 8632.37 830.772  19
   0  -8  -8 9241.99 831.849  18
   0  -8  -8 7468.33 911.358   1
   0  -8  -8 5793.93 418.958  28
   0  -8   9 3010.35 487.549  19
   0  -8  -9 3131.80 372.131  24
   0  -8   9 2985.34 312.027  23
   0  -8   9 2400.49 246.293  27
   0  -8   9 2822.91 293.566   6
   0  -8  -9 2707.87 564.179   1
   0  -8   9 2559.81 470.108  32
   0  -8  -9 3320.12 522.416  18
   0  -8 -10 9994.89 652.749  24
   0  -8  10 10219.0 590.861  23
   0  -8  10 10376.2 556.831   6
   0  -8  11 1210.53 215.083   6
   0  -8 -11 1064.19 240.437  24
   0  -8  11 1146.83 207.851  23
   0  -8 -11 959.984 247.033  13
   0  -8 -12 1211.52 261.330  24
   0  -8 -12 1159.94 248.229  13
   0  -8  12 1617.61 235.291  23
   0  -8  12 1543.23 218.616   6
   0  -8  13-0.33503 82.2667  23
   0  -8 -13 328.637 154.696  24
   0  -8 -13 25.8852 85.8474  13
   0  -8  13 158.670 101.325   6
   0  -8 -14 678.796 156.969  24
   0  -8  14 406.442 91.4297  23
   0  -8  14 410.462 91.0478   6
   0  -7   0 80.9698 93.0024  18
   0  -7   1 10238.9 614.311  18
   0  -7  -1 9563.29 568.721  18
   0  -7   1 9421.22 506.104  32
   0  -7  -1 8864.47 572.163   1
   0  -7  -2 2056.19 327.845   1
   0  -7  -2 2359.94 300.879  18
   0  -7   2 2481.03 286.464  32
   0  -7   3 12154.3 825.074  19
   0  -7   3 10230.4 620.157  32
   0  -7  -3 10264.9 756.295   1
   0  -7  -3 10737.1 640.663  18
   0  -7  -4 72335.8 2156.45   1
   0  -7  -4 74394.9 1779.01  18
   0  -7   4 76985.1 1831.93  32
   0  -7   5 7582.28 701.272  19
   0  -7   5 6847.43 342.047   6
   0  -7  -5 7135.38 750.041   1
   0  -7   5 6290.48 338.886  27
   0  -7  -5 6700.79 388.900  28
   0  -7  -5 6766.69 573.162  18
   0  -7   5 7727.15 630.163  32
   0  -7   6 19067.0 622.882  23
   0  -7  -6 17877.2 1237.31   1
   0  -7  -6 16379.9 569.632  12
   0  -7  -6 12187.1 549.517  28
   0  -7   6 20471.1 1175.14  19
   0  -7   6 17643.3 583.273   6
   0  -7  -6 20482.0 1062.15  18
   0  -7  -6 14157.0 579.701  24
   0  -7   6 22115.2 1140.10  32
   0  -7   6 18421.9 598.779  27
   0  -7   7 4818.69 340.186  23
   0  -7   7 7367.14 733.770  19
   0  -7  -7 4629.87 352.574  28
   0  -7  -7 5116.44 360.398  12
   0  -7  -7 5985.16 764.308   1
   0  -7  -7 7582.46 686.485  18
   0  -7  -7 6841.34 440.682  24
   0  -7   7 6462.49 369.036  27
   0  -7   7 7290.34 397.813   6
   0  -7   7 7223.34 693.703  32
   0  -7  -8 6197.01 798.290   1
   0  -7   8 7673.12 762.760  32
   0  -7   8 6899.26 395.847  27
   0  -7   8 8185.55 446.688   6
   0  -7  -8 7645.66 505.465  24
   0  -7   8 8292.25 479.158  23
   0  -7  -8 8457.95 774.782  18
   0  -7   8 7943.02 776.546  19
   0  -7  -9 459.175 287.111   1
   0  -7   9 694.338 231.333  19
   0  -7   9 855.211 172.544   6
   0  -7   9 510.060 122.514  27
   0  -7   9 1246.51 339.499  32
   0  -7  -9 827.076 189.566   8
   0  -7   9 865.827 185.110  23
   0  -7  -9 790.104 216.547  24
   0  -7  10 131.089 112.730   6
   0  -7  10 402.729 159.667  23
   0  -7 -10 136.748 148.488  24
   0  -7 -10 124.838 111.870   8
   0  -7 -11 1350.92 229.535   8
   0  -7 -11 1423.44 279.229  24
   0  -7  11 1684.89 237.981   6
   0  -7  11 1623.32 252.090  23
   0  -7  12 229.699 116.894   6
   0  -7 -12-105.779 96.8556   8
   0  -7 -12 448.857 218.715  24
   0  -7  12 141.146 106.086  23
   0  -7 -12 242.882 166.710  13
   0  -7 -13 3587.13 388.709  24
   0  -7 -13 2289.74 270.675   8
   0  -7  13 3239.96 317.563  23
   0  -7  13 3349.97 288.757   6
   0  -7 -13 3021.67 365.447  13
   0  -7 -14 541.209 146.741  13
   0  -7  14 573.042 107.211   6
   0  -7 -14 782.893 173.658  24
   0  -7  14 342.134 108.041  23
   0  -6   0 15054.7 655.354  18
   0  -6  -1 10836.3 551.007  18
   0  -6   1 10545.6 493.695  32
   0  -6  -1 9643.52 567.934   1
   0  -6  -2 721.624 180.186   1
   0  -6  -2 916.537 175.752  18
   0  -6   2 1350.58 261.139  19
   0  -6   2 909.745 168.210  32
   0  -6   3 976.067 192.116  32
   0  -6  -3 1235.27 283.877   1
   0  -6   3 1498.48 281.097  19
   0  -6   4 57437.2 1495.76  32
   0  -6  -4 55460.3 1424.68  18
   0  -6   4 59638.4 1722.63  19
   0  -6   5 14537.2 813.110  32
   0  -6  -5 13867.5 773.220  18
   0  -6   5 14691.2 899.745  19
   0  -6  -5 13564.0 938.181   1
   0  -6  -6 24.9371 75.3804  24
   0  -6  -6 210.060 128.531  18
   0  -6  -6 147.660 195.595   1
   0  -6   6 0.72600 77.4101  19
   0  -6   6 154.674 128.740  32
   0  -6   6 153.379 70.0064   6
   0  -6  -7 25247.5 777.751   8
   0  -6  -7 23071.3 723.842  28
   0  -6  -7 24601.6 794.081  24
   0  -6  -7 29738.7 1300.66  18
   0  -6   7 26023.3 706.062   6
   0  -6   7 26838.3 1277.84  32
   0  -6   7 22725.1 643.516  27
   0  -6  -7 25362.9 1442.87   1
   0  -6   7 26053.5 1290.09  19
   0  -6   8 14426.9 535.941  27
   0  -6  -8 12795.7 611.198   8
   0  -6  -8 17882.6 1099.31  18
   0  -6  -8 16651.4 1242.55   1
   0  -6   8 18132.4 630.222   6
   0  -6  -8 17441.2 732.349  24
   0  -6   8 18678.5 1138.01  32
   0  -6   8 17460.8 1084.58  19
   0  -6   9 1534.87 354.132  32
   0  -6  -9 1194.74 419.176   1
   0  -6   9 1439.75 200.046   6
   0  -6  -9 985.313 198.733   8
   0  -6  -9 1247.37 249.542  24
   0  -6   9 1362.01 312.780  19
   0  -6  10 2539.00 298.734  23
   0  -6 -10 2720.83 363.884  24
   0  -6 -10 2390.39 319.085   8
   0  -6  10 2737.73 280.737   6
   0  -6  10 1499.81 393.264  32
   0  -6 -11 2443.43 327.502   8
   0  -6  11 2739.11 314.048  23
   0  -6 -11 2620.09 366.714  24
   0  -6  11 2695.58 283.539   6
   0  -6  12 3121.67 335.325  23
   0  -6 -12 3428.87 408.942  24
   0  -6 -12 3154.96 426.279  13
   0  -6  12 3262.21 301.278   6
   0  -6 -12 2997.59 353.814   8
   0  -6  13 2692.41 252.615   6
   0  -6 -13 2263.74 350.791  13
   0  -6  13 2398.81 293.206  23
   0  -6 -13 2593.97 358.458  24
   0  -6 -13 2131.28 293.302   8
   0  -6 -14 134.364 139.252  24
   0  -6 -14 252.465 107.720   8
   0  -6 -14 402.181 168.679  13
   0  -6  14 183.341 113.559  23
   0  -6 -15 590.928 132.887  13
   0  -6  15 929.700 144.961  23
   0  -6 -15 654.616 149.515  24
   0  -5   0 129.032 105.170  18
   0  -5   0-23.6587 65.6702   1
   0  -5   0 1.65543 44.7702  32
   0  -5   1 144522. 1699.00  32
   0  -5  -1 145443. 1956.47   1
   0  -5  -1 145831. 1823.95  18
   0  -5  -2 9170.64 560.015   1
   0  -5   2 9645.70 471.575  32
   0  -5   2 10264.1 598.894  19
   0  -5  -2 10253.6 505.556  18
   0  -5  -3 158204. 2523.57   1
   0  -5  -3 159373. 2114.38  18
   0  -5   3 161157. 2128.52  32
   0  -5  -4 44767.7 1214.91  18
   0  -5   4 45012.0 1235.96  32
   0  -5   4 45195.5 1367.38  19
   0  -5  -4 42587.1 1427.76   1
   0  -5  -5 3371.28 444.579   1
   0  -5  -5 3500.25 383.155  18
   0  -5   5 4302.70 450.033  19
   0  -5   5 3486.55 378.761  32
   0  -5   6 40014.6 1421.18  19
   0  -5   6 39812.6 1373.03  32
   0  -5  -6 36932.2 1524.87   1
   0  -5  -6 41341.0 1381.44  18
   0  -5  -7 43192.3 1763.09   1
   0  -5   7 44025.3 1553.71  19
   0  -5   7 41377.5 849.808   6
   0  -5  -7 40538.8 978.174  24
   0  -5   7 44011.5 1554.39  32
   0  -5  -8 2665.89 287.081   8
   0  -5  -8 4186.81 515.385  18
   0  -5   8 2720.52 216.927  27
   0  -5   8 3497.82 272.992   6
   0  -5   8 3554.92 471.525  19
   0  -5  -8 3271.91 532.208   1
   0  -5   8 3472.64 474.398  32
   0  -5  -8 3314.74 318.985  24
   0  -5   9 4309.17 316.419   6
   0  -5  -9 4642.58 410.084  24
   0  -5   9 4224.22 532.871  19
   0  -5  -9 3559.01 584.882   1
   0  -5   9 4521.15 580.903  32
   0  -5  -9 4143.08 383.336   8
   0  -5  10 3279.06 292.047   6
   0  -5 -10 2666.24 325.728   8
   0  -5 -10 2215.49 525.829   1
   0  -5  10 2642.44 463.668  32
   0  -5 -10 2727.28 360.993  24
   0  -5 -11 2150.23 324.497   8
   0  -5  11 1841.73 227.907   6
   0  -5 -11 2148.94 346.173  24
   0  -5  12 380.610 120.532   6
   0  -5 -12 277.394 187.720  24
   0  -5  12 313.304 147.141  23
   0  -5 -12 393.297 213.633  13
   0  -5 -12 226.472 135.003   8
   0  -5 -13 2349.84 321.336   8
   0  -5  13 2382.29 232.665   6
   0  -5 -13 2704.48 372.465  24
   0  -5 -13 2831.38 394.597  13
   0  -5  13 2825.23 317.898  23
   0  -5 -14 2820.32 360.658  13
   0  -5  14 2615.55 286.314  23
   0  -5 -14 3101.82 359.106  24
   0  -5 -14 2329.80 290.360   8
   0  -5 -15 885.246 158.316   8
   0  -5  15 949.359 163.641  23
   0  -5 -15 945.540 196.454  24
   0  -5 -15 1091.04 199.270  13
   0  -4   0 962096. 4017.38   1
   0  -4   0 947153. 3468.70  32
   0  -4  -1 201420. 1936.69  18
   0  -4   1 199614. 1802.63  32
   0  -4  -1 197835. 2091.43   1
   0  -4  -2 90716.3 1560.81   1
   0  -4  -2 92220.3 1388.98  18
   0  -4   2 95064.8 1343.26  32
   0  -4   3 12644.6 549.952  32
   0  -4  -3 11587.3 528.545  18
   0  -4   3 11609.5 589.270  19
   0  -4  -3 10400.7 584.060   1
   0  -4   4 16940.4 706.941  32
   0  -4  -4 16955.3 702.614  18
   0  -4   4 16745.1 750.089  19
   0  -4   5 6114.87 475.250  32
   0  -4  -5 6733.37 493.457  18
   0  -4  -5 5352.27 502.726   1
   0  -4   5 6466.46 498.479  19
   0  -4  -6 21434.6 957.600  18
   0  -4  -6 20013.8 1060.84   1
   0  -4   6 21154.8 950.946  19
   0  -4   6 20767.0 946.128  32
   0  -4   7 32071.4 1273.79  32
   0  -4  -7 36453.0 1323.21  18
   0  -4   7 33845.4 1278.05  19
   0  -4  -7 32601.3 1449.24   1
   0  -4   8 3646.11 473.275  32
   0  -4  -8 3697.68 331.240  24
   0  -4  -8 3333.84 319.321   8
   0  -4   8 3832.28 460.102  19
   0  -4  -8 3607.54 547.443   1
   0  -4   8 3760.47 267.054   6
   0  -4  -8 3635.69 316.916  26
   0  -4  -9 961.009 215.569  24
   0  -4   9 851.549 286.292  32
   0  -4  -9 1253.68 368.017   1
   0  -4  -9 853.900 187.393   8
   0  -4   9 1067.01 159.304   6
   0  -4   9 1102.74 258.675  19
   0  -4 -10 2174.36 306.735   8
   0  -4 -10 2270.06 330.154  24
   0  -4 -10 1788.31 450.468   1
   0  -4  10 1867.63 377.282  32
   0  -4  10 1859.85 213.246   6
   0  -4 -11 4039.28 449.819  24
   0  -4 -11 2776.56 572.857   1
   0  -4 -11 3769.95 418.842   8
   0  -4  11 3964.30 570.145  32
   0  -4  11 3774.01 304.097   6
   0  -4 -12 1730.53 340.602  13
   0  -4 -12 1538.41 310.562  24
   0  -4 -12 1692.85 295.840   8
   0  -4  12 1899.89 216.402   6
   0  -4 -13 1188.22 295.670  13
   0  -4  13 1380.01 240.684  23
   0  -4 -13 1220.36 248.197   8
   0  -4 -13 1594.07 310.332  24
   0  -4 -14 1317.13 249.364  24
   0  -4  14 1201.64 215.217  23
   0  -4 -14 1420.07 256.330   8
   0  -4 -14 1721.07 305.426  13
   0  -4 -15 24.8602 94.5508  13
   0  -4 -15 133.535 93.0649   8
   0  -4 -15 252.626 131.591  24
   0  -4  15 28.9265 86.6881  23
   0  -3   0 20.6190 36.5144  32
   0  -3   0 33.9038 48.7697   1
   0  -3   1 735721. 3590.65  19
   0  -3  -1 740294. 3452.10   1
   0  -3   2 147311. 1530.19  32
   0  -3   2 142079. 1681.77  19
   0  -3   3 35599.0 853.609  32
   0  -3  -3 34305.6 964.380   1
   0  -3   3 36421.1 922.734  19
   0  -3  -4 54842.6 1177.27  18
   0  -3   4 52254.5 1170.24  32
   0  -3   4 51744.0 1179.20  19
   0  -3  -4 50722.3 1286.72   1
   0  -3  -5 4022.21 365.982  18
   0  -3   5 3766.35 350.899  19
   0  -3   5 2811.82 311.541  32
   0  -3  -5 2448.97 330.370   1
   0  -3   6 53811.8 1410.49  19
   0  -3   6 54893.4 1470.08  32
   0  -3  -6 58779.6 1505.12  18
   0  -3  -6 54948.4 1620.36   1
   0  -3   7 33126.2 1244.85  32
   0  -3   7 32004.9 1172.13  19
   0  -3  -7 29987.6 628.375  33
   0  -3  -7 32930.1 1367.21   1
   0  -3   8 11224.9 739.036  19
   0  -3  -8 9062.35 371.704  33
   0  -3  -8 11168.7 873.890   1
   0  -3   8 10992.3 784.229  32
   0  -3  -8 10312.6 521.732  26
   0  -3  -8 11557.1 569.562   8
   0  -3  -8 11074.5 551.876  24
   0  -3   9 2065.04 198.169   6
   0  -3   9 1722.84 344.059  32
   0  -3  -9 2188.14 190.986  33
   0  -3  -9 1923.71 267.523   8
   0  -3  -9 2099.15 283.723  24
   0  -3  -9 1676.47 419.148   1
   0  -3  -9 1976.77 257.722  26
   0  -3   9 2432.13 356.406  19
   0  -3  -9 1788.10 196.493  17
   0  -3 -10 3705.84 372.150  26
   0  -3  10 3661.83 515.361  32
   0  -3 -10 3949.88 410.844  24
   0  -3  10 3766.49 277.692   6
   0  -3 -10 3365.10 576.365   1
   0  -3 -10 3475.96 373.082   8
   0  -3 -11 249.536 183.233  24
   0  -3 -11 174.911 152.245   8
   0  -3  11 216.177 95.5787   6
   0  -3 -11 485.719 220.257  13
   0  -3  11 650.616 251.370  32
   0  -3 -11 67.2102 244.013   1
   0  -3 -12 482.150 233.268  13
   0  -3 -12 296.623 183.753  24
   0  -3 -12 580.763 201.474   8
   0  -3 -13 78.9874 104.714   8
   0  -3 -13 267.623 202.403  13
   0  -3 -13 267.688 174.817  24
   0  -3  14 662.873 172.890  23
   0  -3 -14 736.275 219.439  13
   0  -3 -14 577.990 197.832  24
   0  -3 -14 661.795 191.346   8
   0  -3 -15 284.635 115.316   8
   0  -3 -15 358.212 158.670  13
   0  -3  15 478.424 113.412  21
   0  -3 -15 349.732 156.051  24
   0  -3  15 392.170 131.849  23
   0  -3  16 1009.21 151.230  23
   0  -2   0 452684. 1897.87   1
   0  -2   0 470951. 2255.71  19
   0  -2  -1 186421. 1466.48   1
   0  -2   1 182602. 1249.80  32
   0  -2   1 183152. 1462.59  19
   0  -2   2 681484. 2973.60  32
   0  -2   2 693580. 3176.55  19
   0  -2   3 43760.9 889.159  32
   0  -2   3 44358.0 908.389  19
   0  -2  -4 5498.14 387.612   1
   0  -2   4 5776.37 370.290  32
   0  -2   4 6372.04 388.847  19
   0  -2   5 21355.3 796.889  32
   0  -2  -5 20929.9 836.441   1
   0  -2   5 21934.0 791.542  19
   0  -2  -5 23799.8 835.233  18
   0  -2   6 53164.9 1340.07  19
   0  -2  -6 56874.5 1437.46  18
   0  -2   6 54585.1 1408.33  32
   0  -2   7 26599.5 1084.49  32
   0  -2   7 26511.2 1027.04  19
   0  -2  -7 25348.2 656.436  22
   0  -2  -7 27297.9 1170.92   1
   0  -2  -8 18799.3 524.487  33
   0  -2  -8 16749.8 644.943  26
   0  -2  -8 19334.1 724.042  24
   0  -2   8 20509.2 1041.42  32
   0  -2  -8 15858.8 647.349   8
   0  -2  -8 19147.7 1077.63   1
   0  -2   8 21128.7 977.365  19
   0  -2   9 11912.6 777.095  19
   0  -2  -9 11200.3 902.741   1
   0  -2  -9 12218.2 632.381   8
   0  -2  -9 11087.9 430.558  33
   0  -2   9 11700.8 861.929  32
   0  -2  -9 12644.2 649.701  24
   0  -2   9 10459.4 408.384   6
   0  -2  -9 11002.3 580.389  26
   0  -2 -10 2415.26 329.436  24
   0  -2  10 1885.36 394.019  32
   0  -2 -10 1868.66 294.924  26
   0  -2 -10 2685.57 508.787   1
   0  -2 -10 2135.62 294.080   8
   0  -2 -11 2750.33 347.807  26
   0  -2 -11 2601.13 352.722   8
   0  -2  11 2132.25 433.034  32
   0  -2 -11 2889.19 410.403  13
   0  -2 -11 3062.08 386.865  24
   0  -2 -12 4715.22 485.208   8
   0  -2 -12 4871.97 536.425  13
   0  -2 -12 5566.32 522.653  24
   0  -2 -13 310.230 197.289  24
   0  -2 -13 220.727 197.782  13
   0  -2 -13 221.471 146.593   8
   0  -2 -14 1971.78 309.264   8
   0  -2 -14 2256.13 327.127  24
   0  -2 -14 2095.42 341.482  13
   0  -2 -15 419.354 173.885  13
   0  -2  15 360.909 137.367  23
   0  -2 -15 270.542 146.748  24
   0  -2 -15 306.911 133.280   8
   0  -2  15 156.735 92.3622  21
   0  -2  16 37.8001 65.9148  23
   0  -2 -16 167.908 88.9016   8
   0  -1   1 87145.7 786.778  19
   0  -1  -1 87834.5 806.543   1
   0  -1   2 31327.4 595.805  19
   0  -1   2 30147.6 579.101  32
   0  -1   3 258970. 2040.14  32
   0  -1   3 259506. 2078.71  19
   0  -1   4 40340.8 937.275  19
   0  -1   4 38345.3 918.132  32
   0  -1   5 36392.1 1005.89  32
   0  -1  -5 34182.0 985.234   1
   0  -1   5 37307.5 1005.17  19
   0  -1  -5 37831.8 1031.15  18
   0  -1   6 59312.5 1443.95  32
   0  -1  -6 57336.8 1437.90   1
   0  -1   6 61693.7 1414.27  19
   0  -1   7 48302.9 1353.97  19
   0  -1  -7 46195.3 879.408  22
   0  -1   7 50084.0 1471.63  32
   0  -1  -7 47546.3 1452.43   1
   0  -1   8 16038.1 839.780  19
   0  -1  -8 15536.1 563.835  22
   0  -1  -8 16563.5 681.495  24
   0  -1  -8 16222.3 651.692   8
   0  -1  -8 15036.9 464.973  33
   0  -1   8 15837.1 910.531  32
   0  -1  -8 15646.2 550.798  17
   0  -1  -8 14258.4 585.564  26
   0  -1  -8 15528.3 926.469   1
   0  -1  -9 5665.14 369.915  17
   0  -1   9 5334.82 516.249  19
   0  -1  -9 5552.09 406.152  26
   0  -1  -9 6050.41 354.946   9
   0  -1  -9 5478.29 421.811   8
   0  -1   9 5946.76 609.134  32
   0  -1  -9 5405.09 604.912   1
   0  -1  -9 5839.10 380.149  22
   0  -1  -9 5720.07 449.962  24
   0  -1  -9 5131.54 291.330  33
   0  -1 -10 6313.20 491.419   8
   0  -1  10 6237.03 670.466  32
   0  -1 -10 6727.24 520.930  24
   0  -1 -10 6337.81 543.284  13
   0  -1 -10 6079.25 466.865  26
   0  -1 -10 4937.81 624.571   1
   0  -1 -11 7785.92 635.140  13
   0  -1 -11 6837.36 550.384   8
   0  -1 -11 6296.66 517.075  26
   0  -1  11 7575.37 780.212  32
   0  -1 -11 7388.32 583.334  24
   0  -1 -12 4582.75 492.559   8
   0  -1 -12 5759.18 578.819  13
   0  -1 -12 5830.97 544.601  24
   0  -1 -13 1317.33 284.638   8
   0  -1 -13 1103.05 287.655  13
   0  -1 -13 1494.44 302.711  24
   0  -1 -14 182.513 144.231   8
   0  -1 -14 226.128 182.930  24
   0  -1 -14 275.647 188.540  13
   0  -1 -15 194.857 121.837   8
   0  -1  15 33.5898 85.3666  23
   0  -1 -15 111.437 123.244  24
   0  -1 -16 548.827 134.871   8
   0  -1  16 543.125 116.089  23
   0   0  -1 456161. 1349.95   1
   0   0   1 453913. 1592.37  19
   0   0   2 121861. 1102.73  32
   0   0  -2 108213. 1037.88  31
   0   0   2 115618. 1136.17  19
   0   0  -2 104420. 878.732   3
   0   0  -2 114032. 967.331   1
   0   0  -3 23665.0 557.399   1
   0   0  -3 23920.6 526.912   3
   0   0  -3 22872.7 577.593  31
   0   0   3 24021.6 639.130  19
   0   0  -4 23686.7 658.609   1
   0   0  -4 22105.0 661.258  31
   0   0   4 23643.6 732.735  19
   0   0   4 24759.4 720.518  32
   0   0   5 59.8006 67.1889  19
   0   0  -5 125.346 77.8883   1
   0   0  -6 43194.6 1178.21   1
   0   0   6 42761.4 1211.76  32
   0   0   6 42897.0 1195.04  19
   0   0   7 1600.37 268.566  19
   0   0   7 2156.92 316.115  32
   0   0  -7 1517.96 265.086   1
   0   0  -7 2048.15 191.295  22
   0   0   8 2004.36 327.077  32
   0   0  -8 2032.81 254.555  24
   0   0   8 1963.59 302.645  19
   0   0  -8 1440.66 179.726  17
   0   0  -8 1721.18 162.893  33
   0   0  -8 1995.56 208.788  22
   0   0  -8 2267.19 358.695   1
   0   0  -8 1798.47 229.788   8
   0   0  -8 1776.75 215.363  26
   0   0  -9 313.129 110.738  17
   0   0  -9 359.133 147.869  24
   0   0  -9 192.947 169.554   1
   0   0  -9 255.500 74.6463  33
   0   0  -9 332.263 120.067  26
   0   0  -9 264.876 123.089   8
   0   0  -9 423.011 162.892  13
   0   0  -9 430.133 118.300  22
   0   0   9 258.427 149.714  32
   0   0   9 311.162 144.818  19
   0   0 -10 34.6451 144.412  13
   0   0 -10 98.5162 89.5966  22
   0   0 -10 40.5215 106.814   8
   0   0 -10-0.95732 134.438  24
   0   0 -10 212.753 120.903  26
   0   0 -10 56.8760 57.4021   9
   0   0  10 58.7798 93.8149  32
   0   0 -11 287.751 188.848  24
   0   0 -11 111.823 143.643  26
   0   0  11 268.821 154.302  32
   0   0 -11 291.301 153.403   8
   0   0 -11 328.061 195.351  13
   0   0 -12 21226.0 1080.32  13
   0   0 -12 19063.5 918.598   8
   0   0 -12 18130.2 883.184  26
   0   0 -12 20445.1 991.505  24
   0   0 -13 965.076 237.711   8
   0   0 -13 1115.75 290.524  13
   0   0 -13 768.249 248.626  24
   0   0 -14 3478.90 401.228   8
   0   0 -14 3832.30 423.727  24
   0   0 -14 3891.86 452.948  13
   0   0  15 261.134 119.195  23
   0   0 -15 268.878 131.072   8
   0   0 -15 94.9891 130.373  24
   0   0  16 118.595 72.9167  23
   0   0 -16-7.74115 70.3904   8
   0   1  -1 82059.8 711.728   3
   0   1  -1 89370.1 963.899  31
   0   1  -2 24763.8 463.273  20
   0   1  -2 28496.6 745.202  31
   0   1  -2 26130.4 496.377   3
   0   1  -2 27855.1 396.956   1
   0   1   3 228534. 1951.81  19
   0   1  -3 225798. 1746.76   3
   0   1  -3 227432. 1512.23   1
   0   1  -4 33011.3 959.183  31
   0   1  -4 34014.4 801.682   3
   0   1  -4 33859.5 712.005   1
   0   1   4 34513.8 845.008  32
   0   1   5 35568.7 983.668  32
   0   1   5 32404.0 983.047  19
   0   1  -5 35492.8 1023.96  31
   0   1  -5 32146.3 868.862   3
   0   1  -5 34683.2 856.216   1
   0   1   6 54860.9 1374.40  32
   0   1   6 51606.2 1357.09  19
   0   1  -6 53964.1 1222.97   1
   0   1  -6 50811.1 1393.30  31
   0   1   7 50178.4 1452.05  32
   0   1   7 45558.6 1370.89  19
   0   1  -7 48532.3 897.136  22
   0   1  -7 45843.1 1280.62   1
   0   1  -8 15789.8 579.172  17
   0   1   8 16342.7 863.952  19
   0   1  -8 15858.9 564.227  22
   0   1   8 15944.9 907.001  32
   0   1  -8 17095.5 751.559  13
   0   1  -8 15080.3 819.630   1
   0   1  -8 16263.6 692.821  24
   0   1  -8 15952.6 599.849  26
   0   1  -8 14518.9 487.069  33
   0   1  -8 15528.6 624.411   8
   0   1  -9 6126.21 332.668  33
   0   1   9 6756.51 650.440  32
   0   1  -9 6831.38 436.924  26
   0   1  -9 6545.50 416.518  17
   0   1  -9 7266.01 518.643  24
   0   1  -9 7399.21 543.404  13
   0   1  -9 6649.78 403.969  22
   0   1  -9 7255.99 471.106   8
   0   1   9 6553.30 578.152  19
   0   1  -9 5990.08 340.382  16
   0   1  -9 6298.84 585.851   1
   0   1 -10 6011.48 453.472  26
   0   1 -10 7085.97 541.512  24
   0   1 -10 6617.47 558.719  13
   0   1 -10 5976.56 472.288   8
   0   1  10 6201.31 660.441  32
   0   1 -10 5926.16 415.658  22
   0   1 -11 6751.09 460.621  22
   0   1 -11 5319.34 397.204   9
   0   1 -11 6508.19 513.844  26
   0   1 -11 7148.49 557.620   8
   0   1 -11 7426.66 601.818  24
   0   1 -11 7311.34 618.944  13
   0   1  11 7171.45 752.597  32
   0   1 -12 5703.32 570.908  13
   0   1 -12 5878.60 560.842  24
   0   1 -12 5097.83 485.046   8
   0   1 -12 4482.22 458.440  26
   0   1 -13 1319.65 303.821  13
   0   1 -13 1143.19 273.542   8
   0   1 -13 1789.90 336.616  24
   0   1 -14 97.9395 181.646  24
   0   1 -14 245.486 161.362   8
   0   1 -14 298.296 179.117  13
   0   1 -15 5.69711 106.414   8
   0   1  16 374.640 94.4756  23
   0   1 -16 454.333 128.084   8
   0   2   0 435773. 1993.45  31
   0   2   0 422499. 1792.80   3
   0   2  -1 167121. 1463.23  31
   0   2  -1 164894. 1071.82  20
   0   2  -1 167198. 1295.99   3
   0   2  -2 634956. 2829.91   3
   0   2  -2 615100. 2194.09  20
   0   2  -3 41199.7 553.489   1
   0   2  -3 38203.6 1092.08  31
   0   2  -3 38318.6 795.183  20
   0   2  -3 39668.9 809.633   3
   0   2  -4 5536.15 264.647   1
   0   2  -4 5471.57 344.967   3
   0   2  -4 5464.93 480.817  31
   0   2   4 5209.20 351.663  19
   0   2  -5 21018.2 614.080   1
   0   2  -5 22166.5 917.518  31
   0   2   5 18578.1 762.853  19
   0   2  -5 19815.6 720.971   3
   0   2   5 21280.4 768.137  32
   0   2  -6 56311.6 1507.10  31
   0   2   6 46623.6 1334.43  19
   0   2  -6 47162.0 1221.50   3
   0   2  -6 53356.0 1147.17   1
   0   2   6 52142.3 1347.61  32
   0   2  -7 23125.9 1032.88  31
   0   2   7 23580.0 1003.50  32
   0   2   7 22080.4 992.938  19
   0   2  -7 23274.3 855.717   1
   0   2  -7 23645.8 624.772  22
   0   2  -8 21396.4 697.319  17
   0   2  -8 18302.8 788.370  13
   0   2  -8 21910.7 664.826  22
   0   2  -8 22619.9 820.138  24
   0   2   8 21627.8 1032.71  19
   0   2   8 20142.3 1018.09  32
   0   2  -8 19666.5 684.086  26
   0   2  -8 18802.5 589.710  33
   0   2  -9 11529.2 577.350  26
   0   2  -9 11480.4 528.154  22
   0   2  -9 13104.2 694.469  24
   0   2  -9 12723.1 716.709  13
   0   2   9 12673.9 822.140  19
   0   2  -9 7757.22 408.370  16
   0   2  -9 12106.2 610.441   8
   0   2   9 12411.0 867.213  32
   0   2  -9 8497.34 409.832  33
   0   2 -10 2227.45 333.987  13
   0   2 -10 1465.67 192.127  16
   0   2 -10 2695.46 357.024  24
   0   2  10 2082.05 379.928  32
   0   2 -10 2036.73 289.843   8
   0   2 -10 2367.40 266.808  22
   0   2 -10 2136.59 276.999  26
   0   2 -11 2831.34 403.057  13
   0   2 -11 2960.35 395.523  24
   0   2 -11 2626.51 345.480   8
   0   2 -11 2874.80 345.596  26
   0   2  11 2700.65 441.234  32
   0   2 -11 2540.25 297.331  22
   0   2 -11 2008.30 226.808  16
   0   2 -12 5714.17 551.503  24
   0   2 -12 5441.03 506.117   8
   0   2 -12 4590.27 454.863  26
   0   2 -12 5428.78 544.101  13
   0   2 -12 5466.75 414.255   9
   0   2 -13 324.304 216.883  24
   0   2 -13 165.992 152.657  13
   0   2 -13 110.279 156.206   8
   0   2 -14 2196.43 322.708   8
   0   2 -15 287.448 138.845   8
   0   2 -16 43.6216 69.4063   8
   0   3   0 22.3156 46.7160  31
   0   3   0 62.0958 43.1336   3
   0   3   1 632135. 2912.78  31
   0   3  -1 668015. 3031.91   3
   0   3  -1 678452. 3352.59  31
   0   3   1 604571. 2405.72   3
   0   3  -1 632468. 2658.01  20
   0   3  -2 133539. 1509.57   3
   0   3  -2 128881. 1200.12  20
   0   3   2 131900. 1044.03   3
   0   3  -2 131165. 1858.52  31
   0   3   3 33825.7 502.040   3
   0   3  -3 31405.7 420.964   1
   0   3  -3 31335.8 680.358  20
   0   3  -3 34133.4 846.627   3
   0   3  -3 34013.4 1137.94  31
   0   3  -4 47741.1 1443.28  31
   0   3  -4 49953.9 685.630   1
   0   3  -4 49175.0 1124.88   3
   0   3   5 3444.83 345.508  19
   0   3  -5 2232.09 148.218  20
   0   3  -5 3167.29 216.541   1
   0   3  -5 2981.64 402.728  31
   0   3  -5 3012.74 309.542   3
   0   3   6 43502.8 1327.52  19
   0   3  -6 50190.2 1639.11  31
   0   3  -6 44375.9 1268.30   3
   0   3   6 48221.1 1301.61  32
   0   3  -6 45663.9 954.553   1
   0   3  -7 30573.3 728.494  22
   0   3   7 31959.0 1174.72  32
   0   3  -7 27141.0 1066.59   3
   0   3  -7 32621.9 1301.67  31
   0   3   7 28306.2 1175.38  19
   0   3  -7 29548.0 744.667  33
   0   3  -8 7540.75 395.703  16
   0   3  -8 7218.49 587.640   3
   0   3  -8 12650.9 653.636  13
   0   3   8 10753.2 759.899  19
   0   3   8 11654.8 771.841  32
   0   3  -8 8880.15 796.510  31
   0   3  -8 10215.6 416.353  11
   0   3  -8 11472.2 591.224  24
   0   3  -8 10798.3 511.343  26
   0   3  -8 7557.72 394.223  33
   0   3  -8 10914.7 476.700  22
   0   3  -9 2108.22 235.402  22
   0   3   9 1953.46 355.518  32
   0   3  -9 2184.01 306.379  13
   0   3  -9 2094.36 272.569   8
   0   3  -9 1294.39 162.104  11
   0   3   9 1884.05 335.639  19
   0   3  -9 2306.26 304.881  24
   0   3  -9 1706.78 214.098  16
   0   3  -9 1259.08 167.944  33
   0   3  -9 1668.96 232.649  26
   0   3 -10 4096.43 434.013  24
   0   3 -10 4084.32 377.947  26
   0   3 -10 4105.79 450.128  13
   0   3 -10 3764.17 326.585  22
   0   3 -10 3794.50 385.283   8
   0   3 -10 3963.85 324.403  16
   0   3  10 4032.89 517.429  32
   0   3 -11 238.619 189.831  13
   0   3 -11 127.389 69.0406  16
   0   3 -11 179.979 137.425   8
   0   3 -11 246.910 144.994  26
   0   3 -11 314.954 125.539  22
   0   3 -11 390.734 205.264  24
   0   3  11-41.4443 57.7412  32
   0   3 -12 418.067 210.882  24
   0   3 -12 465.821 223.378  13
   0   3 -12 296.366 162.297  26
   0   3 -12 293.309 162.182   8
   0   3 -12 430.534 121.815  16
   0   3 -13 39.3462 131.569   8
   0   3 -13 165.727 110.690   9
   0   3 -14 437.615 162.454   8
   0   3 -15 184.111 112.698   8
   0   4   0 943414. 4220.81  31
   0   4   0 899833. 3774.02   3
   0   4   1 187181. 1599.20   3
   0   4   1 186771. 1839.43  31
   0   4  -1 199088. 1905.14   3
   0   4  -1 198917. 2079.08  31
   0   4  -1 190998. 1715.33  20
   0   4   2 85947.9 1002.08   3
   0   4   2 88738.1 1330.58  31
   0   4  -2 88341.7 1170.36  20
   0   4  -3 10761.5 700.553  31
   0   4  -3 9335.06 404.397  20
   0   4  -3 7404.67 172.920   1
   0   4   3 9341.69 306.673   3
   0   4   3 8428.11 228.649   2
   0   4  -3 9711.47 497.050   3
   0   4  -4 13971.2 652.976   3
   0   4  -4 12122.5 842.072  31
   0   4  -4 13240.3 290.245   1
   0   4  -4 12140.4 569.325  20
   0   4   4 12323.9 314.741   3
   0   4  -5 4250.71 401.101   3
   0   4  -5 4730.90 570.071  31
   0   4  -6 22315.3 1133.51  31
   0   4  -6 17385.1 856.041   3
   0   4   6 19004.8 825.759  32
   0   4  -6 14696.5 456.960  22
   0   4   6 19676.4 910.927  19
   0   4  -7 27748.0 766.118  33
   0   4  -7 30601.9 895.097  24
   0   4  -7 31321.7 740.679  22
   0   4   7 32896.5 1192.30  32
   0   4  -7 32024.2 1439.81  31
   0   4  -7 29538.8 1181.46   3
   0   4   7 30400.3 1250.64  19
   0   4   8 3823.16 441.952  32
   0   4  -8 3751.54 304.042  26
   0   4  -8 3444.02 289.669  16
   0   4  -8 3759.30 359.889  24
   0   4  -8 3348.15 281.924  33
   0   4  -8 4518.59 399.135  13
   0   4   8 3440.95 453.513  19
   0   4  -8 3469.29 478.381  31
   0   4  -8 2905.30 402.374   3
   0   4  -8 3816.31 287.411  22
   0   4  -8 2680.00 235.162  11
   0   4  -9 1080.30 275.433  31
   0   4  -9 1132.45 205.755   8
   0   4   9 1148.73 267.588  32
   0   4  -9 1159.79 200.125  26
   0   4  -9 1204.84 243.337  24
   0   4  -9 1394.24 262.147  13
   0   4  -9 1079.34 185.755  16
   0   4  -9 1223.06 187.352  22
   0   4  -9 844.705 146.343  33
   0   4  -9 851.584 146.206  11
   0   4   9 918.041 234.668  19
   0   4 -10 1274.91 181.100  11
   0   4 -10 1806.09 313.685  24
   0   4 -10 2234.55 336.844  13
   0   4 -10 1781.25 277.815   8
   0   4  10 2218.64 379.048  32
   0   4 -10 1954.76 249.186  16
   0   4 -10 1933.60 274.122  26
   0   4 -10 1905.56 243.979  22
   0   4 -11 3642.61 379.991  26
   0   4 -11 3899.08 449.218  24
   0   4 -11 4304.21 479.019  13
   0   4 -11 3286.13 286.475  11
   0   4 -11 3514.90 330.480  16
   0   4 -11 3456.24 394.131   8
   0   4 -11 3509.46 343.355  22
   0   4  11 3355.16 470.269  32
   0   4 -12 2049.18 318.880   8
   0   4 -12 1407.72 210.897  16
   0   4 -12 1671.63 241.517  22
   0   4 -12 1821.52 288.743  26
   0   4 -13 1020.92 240.064   8
   0   4 -13 949.214 170.454  16
   0   4 -13 1329.12 212.410   9
   0   4 -14 1334.66 234.722   8
   0   4 -15-2.00651 81.0298   8
   0   5   0-23.0803 52.3691   3
   0   5   0-5.90782 64.7191  31
   0   5  -1 138758. 1674.87  20
   0   5  -1 148113. 2023.50  31
   0   5   1 127271. 1517.25   3
   0   5  -1 139495. 1789.84   3
   0   5   1 130787. 1746.04  31
   0   5   1 124757. 989.136  30
   0   5   2 8825.68 376.611   3
   0   5  -2 9718.80 603.030  31
   0   5   2 9372.65 478.208  31
   0   5  -2 9839.42 452.074  20
   0   5  -2 9816.94 512.145   3
   0   5   3 132446. 1330.01   3
   0   5  -3 151103. 2144.52   3
   0   5  -3 155888. 2742.92  31
   0   5   3 139817. 1956.45  31
   0   5  -3 142739. 1782.00  20
   0   5  -4 37101.3 1541.36  31
   0   5   4 35925.6 611.067   3
   0   5  -4 36817.2 1018.05  20
   0   5  -5 3344.00 482.829  31
   0   5  -5 3395.80 387.699   3
   0   5   6 37617.9 1330.05  19
   0   5  -6 32874.0 809.363  33
   0   5  -6 37711.3 1580.75  31
   0   5   6 32883.8 972.626  20
   0   5  -6 36359.5 1312.69   3
   0   5  -7 36716.8 1022.45  24
   0   5   7 39268.0 1510.61  19
   0   5  -7 46518.3 1090.87  14
   0   5   7 39140.4 1292.98  32
   0   5  -7 38203.8 937.765  33
   0   5  -7 39912.9 848.371  22
   0   5  -7 36788.6 1418.81   3
   0   5   7 37980.5 1045.62  20
   0   5  -7 42790.8 911.862  11
   0   5  -7 44551.4 1126.80  13
   0   5  -7 43829.7 1706.35  31
   0   5  -8 3258.62 452.410   3
   0   5  -8 3479.92 280.091  22
   0   5  -8 3982.05 302.499  11
   0   5   8 3181.35 402.679  32
   0   5  -8 3745.19 301.090  26
   0   5   8 3483.89 465.876  19
   0   5  -8 4282.95 390.590  24
   0   5  -8 3383.93 294.695  33
   0   5  -8 2759.07 494.951  31
   0   5  -8 3937.85 383.537  13
   0   5  -9 4395.68 334.344  11
   0   5   9 3869.98 508.655  19
   0   5  -9 2837.27 276.492  33
   0   5  -9 3860.88 311.727  22
   0   5  -9 3906.25 345.447  26
   0   5   9 3855.37 472.959  32
   0   5  -9 3378.35 520.351  31
   0   5  -9 3924.88 350.492  16
   0   5 -10 2702.21 258.247  33
   0   5 -10 2597.71 322.952   8
   0   5 -10 2495.20 275.362  22
   0   5  10 2927.05 420.587  32
   0   5 -10 2710.27 276.284  11
   0   5 -10 2710.62 311.740  26
   0   5 -10 2555.60 289.165  16
   0   5 -11 1925.30 275.943  26
   0   5 -11 1523.41 205.004  11
   0   5 -11 1753.80 288.121   8
   0   5 -11 1873.89 248.039  22
   0   5 -11 2035.83 276.145  16
   0   5 -12 37.9286 85.3852  22
   0   5 -12 194.330 115.129  26
   0   5 -12 278.030 143.845   8
   0   5 -12 275.611 98.7886  11
   0   5 -12 51.4490 91.8515  16
   0   5 -13 2527.67 318.297   8
   0   5 -13 2314.65 255.711  16
   0   5 -14 2346.41 278.188   8
   0   5 -15 759.858 136.484   8
   0   6   0 12319.5 572.996  20
   0   6   0 12151.3 552.047   3
   0   6   0 12050.1 598.042  31
   0   6  -1 10565.4 526.256  20
   0   6   1 10408.6 481.929   3
   0   6   1 9635.70 523.276  31
   0   6  -1 10478.8 607.662  31
   0   6   1 10009.0 528.751  20
   0   6  -1 10331.1 543.583   3
   0   6  -2 1328.78 270.882  31
   0   6  -2 1232.65 191.504  20
   0   6   2 1314.06 199.308  31
   0   6   2 1245.66 167.850   3
   0   6   3 1337.87 157.906   3
   0   6   3 1737.28 243.984  31
   0   6  -3 1461.61 250.210   3
   0   6  -3 1920.83 243.437  20
   0   6  -3 1772.89 341.451  31
   0   6  -4 45108.6 1227.50  20
   0   6  -4 54741.0 1519.34   3
   0   6   4 47170.2 1301.88  31
   0   6  -4 48336.0 831.183  33
   0   6  -4 51936.0 1893.11  31
   0   6  -5 11748.9 455.692  33
   0   6   5 11683.0 627.427  20
   0   6  -5 11548.4 382.468  22
   0   6   5 11123.1 662.726  31
   0   6  -5 13204.8 1004.94  31
   0   6  -5 13599.8 817.579   3
   0   6  -5 10200.9 666.874  20
   0   6  -6 366.256 204.867  31
   0   6  -6 148.649 79.4361  33
   0   6  -6 7.72922 92.3209  14
   0   6  -6 111.374 147.534   3
   0   6  -6 154.016 68.1417  22
   0   6   6 194.996 94.7237  20
   0   6  -6 232.377 91.2925  11
   0   6  -7 23842.2 774.783  33
   0   6   7 23985.8 1010.78  32
   0   6  -7 27407.7 777.787  11
   0   6  -7 24898.4 685.558  22
   0   6   7 23702.1 914.721  20
   0   6   7 27881.8 1296.50  19
   0   6  -7 24165.5 1229.77   3
   0   6  -7 25679.7 1448.31  31
   0   6  -8 16367.8 1114.23  31
   0   6   8 17295.6 1096.49  19
   0   6  -8 18357.4 667.196  11
   0   6   8 15690.0 872.682  32
   0   6  -8 15892.5 617.560  26
   0   6  -8 14271.3 991.759   3
   0   6  -8 19392.1 766.429  14
   0   6  -8 16024.8 664.915  33
   0   6  -8 16194.7 594.715  22
   0   6  -9 572.341 141.134  33
   0   6  -9 943.132 196.455   8
   0   6  -9 1151.16 214.772  16
   0   6  -9 972.870 286.231  31
   0   6  -9 910.239 159.924  22
   0   6  -9 939.559 175.746  11
   0   6  -9 1204.03 183.153  26
   0   6   9 595.478 177.984  32
   0   6  -9 557.783 204.006   3
   0   6  10 1881.84 410.939  30
   0   6 -10 1964.85 259.879  26
   0   6 -10 2237.05 263.535  11
   0   6 -10 1936.27 232.040  33
   0   6 -10 2229.37 255.492  22
   0   6 -10 1739.47 258.736   8
   0   6 -10 1926.52 273.131  16
   0   6 -10 2017.57 398.237  31
   0   6 -11 2366.21 283.027  26
   0   6 -11 2535.96 274.838  11
   0   6 -11 2475.67 306.411  16
   0   6 -11 1826.26 288.630   8
   0   6 -11 1899.91 243.792  22
   0   6 -12 1899.18 224.454  11
   0   6 -12 2613.65 324.299   8
   0   6 -12 2945.61 312.365  16
   0   6 -12 2130.92 248.763  22
   0   6 -12 2457.94 289.042  26
   0   6 -13 2094.61 279.903   8
   0   6 -13 2003.75 240.460  16
   0   6 -14 46.6113 65.0589  16
   0   6 -14 307.805 109.347   8
   0   6 -14 236.456 84.4660   9
   0   7   0 6.27730 77.2436  31
   0   7   0 13.7262 78.7163   3
   0   7   0 12.6514 94.7614  20
   0   7  -1 9626.50 559.317  20
   0   7   1 9677.07 575.807  20
   0   7   1 8717.67 554.636  31
   0   7   1 8408.84 487.873   3
   0   7  -1 9384.21 632.884  31
   0   7  -1 8646.15 551.317   3
   0   7  -2 2708.03 392.732  31
   0   7   2 2480.86 307.900  31
   0   7  -2 2178.70 273.392  20
   0   7  -2 2231.57 308.905   3
   0   7   2 2188.35 240.736   3
   0   7   2 2191.43 288.634  20
   0   7   3 10124.9 616.767  20
   0   7  -3 9505.65 379.774  33
   0   7   3 9015.76 576.611  31
   0   7  -3 10265.4 603.317  20
   0   7   3 8599.35 431.589   3
   0   7  -3 10481.2 684.042   3
   0   7   3 8543.31 429.600  30
   0   7  -3 11810.1 886.229  31
   0   7  -4 59994.8 1549.56  20
   0   7  -4 71957.8 1885.45   3
   0   7  -4 65100.7 1054.51  33
   0   7  -4 74850.5 2417.97  31
   0   7   4 67403.5 1612.73  20
   0   7   4 67881.3 1655.42  31
   0   7  -5 4663.95 490.384  20
   0   7   5 5686.65 506.414  31
   0   7  -5 6284.40 452.043  14
   0   7  -5 6009.57 735.855  31
   0   7  -5 6018.58 354.310  33
   0   7  -5 6696.40 365.338  11
   0   7  -5 5601.91 276.998  22
   0   7   5 5583.87 478.578  20
   0   7  -5 6481.58 620.829   3
   0   7   6 16512.3 827.979  20
   0   7  -6 16623.8 522.695  22
   0   7   6 17680.0 924.267  31
   0   7  -6 17649.5 1050.80   3
   0   7  -6 17202.4 646.784  33
   0   7  -6 18411.8 641.748  11
   0   7  -6 17470.4 1266.08  31
   0   7   7 8044.60 742.573  19
   0   7  -7 7026.84 417.469  11
   0   7  -7 5589.73 637.869   3
   0   7  -7 5836.15 406.857  33
   0   7  -7 6276.77 351.934  22
   0   7   7 5411.35 474.136  20
   0   7  -7 7565.85 510.275  14
   0   7  -7 6650.19 755.501  31
   0   7  -8 7678.52 414.320  22
   0   7   8 5427.84 635.292  19
   0   7  -8 6717.20 776.061  31
   0   7  -8 8315.74 477.980  11
   0   7  -8 7102.37 467.891  33
   0   7  -8 6872.64 727.761   3
   0   7  -8 9542.71 580.115  14
   0   7  -9 941.373 166.608  22
   0   7  -9 591.762 242.453   3
   0   7  -9 730.384 198.729  16
   0   7  -9 725.227 176.295   8
   0   7  -9 590.025 237.927  31
   0   7  -9 946.772 189.083  11
   0   7  -9 478.998 137.197  33
   0   7 -10 134.745 103.766   8
   0   7 -10 162.143 158.465  16
   0   7 -10 170.225 99.1501  22
   0   7 -10 176.009 119.766  11
   0   7 -10 346.046 67.4928  33
   0   7 -11 1404.73 220.129  11
   0   7 -11 1561.78 252.210   8
   0   7 -11 1330.16 241.061  16
   0   7 -11 1256.79 191.385  22
   0   7 -12 94.9459 94.9885   8
   0   7 -12 185.689 115.187  16
   0   7 -12 72.1839 63.7608  22
   0   7 -12 38.7467 90.9679  11
   0   7 -13 1768.08 233.613   8
   0   7 -13 2830.33 277.761  16
   0   7 -14 230.545 77.0768   9
   0   7 -14 200.633 81.9904  16
   0   8   0 4807.46 470.665  31
   0   8   0 4603.92 423.302   3
   0   8  -1 5089.58 528.353  31
   0   8   1 4628.19 445.888  31
   0   8  -1 5111.78 456.486  20
   0   8  -1 4773.12 451.855   3
   0   8   1 3704.87 358.034   3
   0   8   1 4762.54 450.137  20
   0   8   2 4379.45 430.456  31
   0   8  -2 5752.20 611.462  31
   0   8   2 4505.20 443.329  20
   0   8  -2 4637.62 435.653  20
   0   8   2 3998.05 349.782   3
   0   8  -2 4896.26 482.012   3
   0   8  -3 4399.09 282.884  33
   0   8   3 4336.24 438.236  31
   0   8  -3 4578.13 447.346  20
   0   8  -3 4917.22 365.844  14
   0   8   3 5081.04 480.933  20
   0   8  -3 4365.15 582.540  31
   0   8  -3 5405.36 535.452   3
   0   8  -4 10038.6 446.426  11
   0   8   4 9233.61 648.302  31
   0   8  -4 9338.33 556.425  14
   0   8  -4 10251.0 478.531   4
   0   8  -4 9517.53 925.566  31
   0   8  -4 9948.39 771.503   3
   0   8   4 9585.80 664.810  20
   0   8  -4 9759.30 442.114  33
   0   8  -5 11024.1 500.132  11
   0   8  -5 10004.8 819.555   3
   0   8  -5 9971.16 475.153  33
   0   8   5 9880.04 690.636  31
   0   8  -5 10466.5 615.242  14
   0   8   5 9635.32 676.277  20
   0   8  -5 10357.2 980.656  31
   0   8  -6 6936.69 422.174  11
   0   8  -6 7506.15 531.944  14
   0   8  -6 6285.58 798.137  31
   0   8   6 6342.95 561.098  20
   0   8  -6 6579.94 690.301   3
   0   8  -6 6109.89 407.878  33
   0   8  -7 2999.84 304.955  33
   0   8  -7 2776.89 532.730  31
   0   8  -7 2906.49 482.903   3
   0   8  -7 2613.76 233.343  22
   0   8  -7 3642.38 326.812  11
   0   8  -7 3803.85 396.602  14
   0   8   7 4263.02 559.370  19
   0   8   7 2564.14 357.192  20
   0   8  -8 8241.09 567.323  14
   0   8  -8 5637.97 770.978  31
   0   8  -8 7114.11 486.607  33
   0   8  -8 7716.62 487.570  11
   0   8  -8 7328.69 405.795  22
   0   8   8 6755.51 716.393  19
   0   8  -8 6228.90 726.704   3
   0   8  -9 2550.15 300.429  11
   0   8  -9 1287.40 333.224   3
   0   8  -9 2184.21 237.152  22
   0   8  -9 1816.04 250.375  33
   0   8  -9 2093.74 426.009  31
   0   8  -9 2108.58 294.254  16
   0   8 -10 7914.11 478.740  33
   0   8 -10 7135.95 423.551  22
   0   8 -10 8653.05 570.759  16
   0   8 -10 8440.83 532.847  11
   0   8 -11 582.105 135.893  22
   0   8 -11 1204.45 216.151  11
   0   8 -11 1190.37 229.026  16
   0   8 -12 1353.22 198.528  11
   0   8 -12 1481.73 228.379  16
   0   8 -13 60.7648 92.2078  16
   0   8 -14 367.170 90.0783   9
   0   8 -14 247.411 93.6044  16
   0   9   0-130.970 125.080   3
   0   9   0-80.0040 111.178  31
   0   9   0 69.2523 104.708  20
   0   9  -1 3507.85 419.608  20
   0   9   1 3363.44 376.435   3
   0   9   1 3561.23 428.487  20
   0   9   1 3545.72 432.285  31
   0   9  -1 3822.24 499.913  31
   0   9  -1 3757.02 440.727   3
   0   9   2 5077.38 436.424   3
   0   9  -2 5259.61 542.943   3
   0   9  -2 5400.48 517.349  20
   0   9   2 5483.26 533.946  20
   0   9  -2 5479.60 646.936  31
   0   9   2 4721.23 485.277  31
   0   9  -2 5359.98 328.092  33
   0   9   3 3196.09 404.089  31
   0   9  -3 3607.04 482.119   3
   0   9  -3 3780.06 293.009   4
   0   9  -3 3338.55 421.670  20
   0   9  -3 3924.65 357.438  14
   0   9   3 3409.09 429.755  20
   0   9  -3 3744.84 285.232  33
   0   9  -3 3053.42 523.017  31
   0   9  -3 3393.30 261.039  11
   0   9   4 2239.09 344.597  20
   0   9  -4 2122.84 244.483   4
   0   9  -4 1913.60 282.896  14
   0   9  -4 1481.92 420.474  31
   0   9  -4 2114.32 224.905  11
   0   9  -4 1104.52 256.425  20
   0   9  -4 2474.44 429.092   3
   0   9   4 1389.02 270.394  31
   0   9  -4 2039.29 227.335  33
   0   9  -5 23448.7 779.662  33
   0   9  -5 23981.6 777.263  11
   0   9   5 21422.9 1088.56  20
   0   9  -5 21578.3 1502.56  31
   0   9  -5 23307.2 958.213  14
   0   9  -5 22127.5 1257.28   3
   0   9  -6 14379.2 656.439  33
   0   9   6 14106.6 895.290  20
   0   9  -6 13471.2 1177.72  31
   0   9  -6 15495.8 656.294  11
   0   9  -6 13772.3 1038.41   3
   0   9  -6 16751.7 830.046  14
   0   9  -7 2738.78 487.182   3
   0   9   7 2746.80 396.378  20
   0   9  -7 3560.89 397.056  14
   0   9  -7 3655.73 346.744  11
   0   9   7 3368.39 530.864  19
   0   9  -7 2795.84 536.182  31
   0   9  -7 3449.77 350.482  33
   0   9  -8 709.963 212.829  14
   0   9  -8 531.036 222.707  31
   0   9  -8 749.336 180.219  33
   0   9  -8 606.733 258.162   3
   0   9  -8 310.970 103.825   7
   0   9  -8 712.006 184.340  11
   0   9  -9 6404.61 493.035  16
   0   9  -9 6720.48 477.436  11
   0   9 -10 898.322 205.318  11
   0   9 -10 1185.57 240.957  16
   0   9 -10 1025.41 192.688  33
   0   9 -11 1316.67 232.689  16
   0   9 -11 1521.86 229.430  11
   0   9 -12 4.64874 110.772  16
   0   9 -13 384.247 113.871  16
   0  10   0 7898.93 652.344   3
   0  10   0 8208.40 741.683  31
   0  10   0 8390.53 701.484  20
   0  10  -1 4812.98 613.678  31
   0  10   1 4729.12 538.321  20
   0  10   1 3984.00 441.700   3
   0  10   1 4373.67 525.910  31
   0  10  -1 3806.32 475.993  20
   0  10  -1 4281.78 506.866   3
   0  10   2 15441.1 972.872  20
   0  10  -2 14897.9 683.536  14
   0  10  -2 14813.8 1134.89  31
   0  10  -2 14735.1 955.710   3
   0  10  -2 13803.1 502.485  11
   0  10  -2 15262.6 598.874  33
   0  10   2 14391.1 921.229  31
   0  10  -2 14503.5 565.202   4
   0  10  -2 14554.7 923.574  20
   0  10   3 21317.6 1104.40  31
   0  10  -3 24155.6 771.961  33
   0  10  -3 22324.5 1505.31  31
   0  10  -3 22726.5 696.853  11
   0  10  -3 22149.5 1174.30  20
   0  10  -3 22273.0 898.390  14
   0  10  -3 22882.4 760.027   4
   0  10  -3 25313.3 1315.72   3
   0  10   3 24176.6 1229.36  20
   0  10  -4 13334.3 996.140   3
   0  10  -4 10634.6 1085.12  31
   0  10  -4 13547.2 578.094  11
   0  10  -4 11822.7 711.598  14
   0  10  -4 13893.9 610.727  33
   0  10  -4 6781.02 686.019  20
   0  10   4 8357.10 684.553  31
   0  10   4 14335.6 954.404  20
   0  10   5 1527.63 315.295  20
   0  10  -5 1214.76 269.524  14
   0  10  -5 1001.94 316.117   3
   0  10  -5 1194.32 406.061  31
   0  10  -5 1330.66 209.324  11
   0  10  -5 1458.44 219.692  33
   0  10  -6 5820.79 533.160  14
   0  10   6 5123.71 562.426  20
   0  10  -6 6239.41 442.848  11
   0  10  -6 5201.95 671.884   3
   0  10  -6 5888.67 450.964  33
   0  10   7 39.9076 81.6651  20
   0  10  -7-145.066 131.410  33
   0  10   7 352.903 187.856  19
   0  10  -7-520.634 257.351   3
   0  10  -7-1.02632 185.205  14
   0  10  -7-80.5081 129.019  11
   0  10  -7 93.4042 118.497   7
   0  10  -7 443.394 264.389  31
   0  10  -8 1720.77 272.063  16
   0  10  -8 1826.38 273.423  33
   0  10  -8 1953.97 315.069  14
   0  10  -8 2293.31 302.357  11
   0  10  -8 1147.43 210.177   7
   0  10  -9 3255.21 340.773  33
   0  10  -9 4308.60 422.072  16
   0  10 -10 4781.17 370.646  33
   0  10 -10 5842.44 447.300  11
   0  10 -10 5464.36 446.765  16
   0  10 -11 1411.29 220.941  11
   0  10 -11 1300.50 229.698  16
   0  10 -12 284.336 123.487  16
   0  10 -13 57.7817 79.8960  16
   0  11   0 335.217 184.364   3
   0  11   0-26.2552 110.141  20
   0  11   0 147.666 178.843  31
   0  11  -1 6720.89 686.416  20
   0  11   1 6592.69 715.032  31
   0  11  -1 7449.57 705.975   3
   0  11   1 7217.95 721.281  20
   0  11  -1 7294.88 808.185  31
   0  11   1 5992.34 576.853   3
   0  11  -2 1169.79 306.932   3
   0  11  -2 1573.38 420.670  31
   0  11   2 1265.26 311.537  31
   0  11  -2 1345.80 243.725  14
   0  11  -2 1374.20 200.735   4
   0  11   2 1592.84 355.774  20
   0  11  -2 1356.16 168.964  11
   0  11  -2 1790.17 358.556  20
   0  11  -2 1945.23 243.480  33
   0  11  -3 675.181 202.458  14
   0  11  -3 724.790 302.181   3
   0  11   3 766.204 252.982  20
   0  11   3 279.359 134.633  31
   0  11  -3 439.386 222.423  20
   0  11  -3 746.715 149.992  11
   0  11  -3 658.169 283.575  31
   0  11  -3 708.655 147.836  33
   0  11  -4 6398.43 889.301  31
   0  11   4 7267.75 735.958  20
   0  11  -4 6126.58 724.134   3
   0  11  -4 7407.28 483.818  33
   0  11  -4 6734.01 426.316  11
   0  11  -4 6253.12 545.195  14
   0  11  -4 4921.22 637.006  20
   0  11  -5 920.941 273.470  14
   0  11  -5 1407.74 230.298  33
   0  11  -5 831.160 330.383  31
   0  11  -5 1308.57 219.333  11
   0  11  -5 323.259 213.665   3
   0  11   5 1028.82 277.793  20
   0  11  -6 2450.38 312.228  33
   0  11  -6 1688.14 441.250   3
   0  11  -6 2388.08 376.036  14
   0  11   6 2396.35 413.077  20
   0  11  -6 2395.42 293.725  11
   0  11  -6 1744.77 507.381  31
   0  11  -7 127.957 174.176  14
   0  11  -7 411.939 167.049  11
   0  11  -7 259.159 145.408   7
   0  11  -7 598.224 197.011  33
   0  11  -8 36.7398 138.324  14
   0  11  -8 28.0844 91.2116   7
   0  11  -8-70.6214 163.868  16
   0  11  -8-49.4116 135.805  11
   0  11  -8-65.0733 126.681  33
   0  11  -9 2231.24 301.743  11
   0  11  -9 1950.81 290.388  16
   0  11 -10 1369.71 235.207  16
   0  11 -10 1074.87 215.204  11
   0  11 -11 940.769 183.975  16
   0  11 -12 149.319 94.5176  16
   0  12   0 9726.34 895.419  20
   0  12   0 8200.83 748.514   3
   0  12   0 9292.86 937.493  31
   0  12  -1 3323.32 535.578  20
   0  12  -1 3586.20 331.855  33
   0  12  -1 3413.69 375.376  14
   0  12  -1 3237.63 497.445   3
   0  12  -1 3173.13 592.787  31
   0  12   1 3797.17 564.529  20
   0  12   1 3124.21 545.273  31
   0  12   2 225.929 147.354  20
   0  12  -2 372.970 176.184  14
   0  12  -2 209.526 128.169  33
   0  12   2-195.324 166.943  31
   0  12  -2-245.637 209.932   3
   0  12  -2-354.470 200.923  31
   0  12  -2 182.159 140.323  20
   0  12   3 2942.20 505.500  20
   0  12  -3 3244.83 551.049   3
   0  12  -3 3178.21 280.268  11
   0  12  -3 1527.85 382.492  20
   0  12  -3 3291.75 419.233  14
   0  12  -3 3850.79 361.334  33
   0  12  -3 1797.06 489.581  31
   0  12   4-70.3022 127.775  20
   0  12  -4 249.413 205.530   3
   0  12  -4-22.0932 127.425  33
   0  12  -4 157.224 197.292  31
   0  12  -4 187.697 91.9424  11
   0  12  -4 64.9323 177.905  14
   0  12  -5 1619.54 232.601  11
   0  12  -5 1670.61 268.576  33
   0  12  -5 1435.40 321.199  14
   0  12  -6 1681.96 329.020  14
   0  12  -6 1754.32 260.300  11
   0  12  -6 1276.10 249.016  33
   0  12  -7 728.202 197.294   7
   0  12  -7 1104.44 247.814  33
   0  12  -7 1200.60 221.377  16
   0  12  -7 1248.45 280.717  14
   0  12  -7 1303.02 238.444  11
   0  12  -8 2197.07 283.749   7
   0  12  -8 2685.65 325.883  33
   0  12  -8 3084.28 372.641  14
   0  12  -8 3695.75 372.343  11
   0  12  -8 3012.70 337.184  16
   0  12  -9 2207.92 246.076   7
   0  12  -9 1697.78 235.197  33
   0  12 -10 2259.63 260.964  16
   0  12 -11 12.0660 86.0929  16
   0  12 -12 390.484 99.5741  16
   0  13   0 472.347 277.731  31
   0  13   0 211.852 124.503  33
   0  13   0-9.64063 150.933  14
   0  13  -1 12362.1 1086.09  20
   0  13  -1 13782.3 669.332  33
   0  13   1 13272.2 1119.00  20
   0  13   1 11962.6 1108.15  31
   0  13  -1 12219.2 750.138  14
   0  13  -1 11385.8 1131.06  31
   0  13  -2 11269.3 746.971  14
   0  13  -2 10561.6 1008.21  20
   0  13  -2 9468.98 886.324   3
   0  13  -3 717.170 247.400  14
   0  13  -3 900.315 212.272  33
   0  13  -3 820.821 153.579  11
   0  13  -4 184.011 183.997  14
   0  13  -4 432.341 129.464  11
   0  13  -4 349.419 161.073  33
   0  13  -5 1542.03 264.886  33
   0  13  -5 1399.83 303.258  14
   0  13  -5 1544.74 226.055  11
   0  13  -6 2506.63 330.010  33
   0  13  -6 2573.50 360.265  14
   0  13  -6 2552.35 291.768  11
   0  13  -6 2150.70 319.213   7
   0  13  -6 2181.89 280.796  16
   0  13  -7 1582.26 266.082   7
   0  13  -7 1824.99 261.869  16
   0  13  -7 1871.51 300.466  14
   0  13  -7 1965.92 259.419  11
   0  13  -7 1490.10 264.164  33
   0  13  -8 83.7224 87.3017   7
   0  13  -8 91.3673 107.889  33
   0  13  -8 220.960 134.593  11
   0  13  -8 163.886 117.118  16
   0  13  -9 922.613 178.308  16
   0  13  -9 536.222 126.268  33
   0  13  -9 718.885 130.833   7
   0  13 -10 365.133 128.770  16
   0  13 -11 279.861 90.8943  16
   0  14   0 10224.7 694.615  14
   0  14   0 11206.7 614.829  33
   0  14   1 961.519 208.247  33
   0  14  -1 1001.17 217.324  33
   0  14  -1 891.600 252.451  14
   0  14   1 1116.93 244.282  14
   0  14  -2 3413.40 440.261  14
   0  14   2 3779.04 363.918  33
   0  14  -2 4272.77 394.530  33
   0  14   2 3740.11 397.260  14
   0  14  -3 844.127 210.525  33
   0  14  -3 618.790 231.700  14
   0  14  -4 2854.41 293.293  16
   0  14  -4 2930.29 345.459  33
   0  14  -4 2624.92 385.524  14
   0  14  -5 8085.33 554.942  33
   0  14  -5 7562.24 579.390   7
   0  14  -5 7631.53 591.430  14
   0  14  -5 8371.83 496.292  16
   0  14  -6 937.378 212.239  33
   0  14  -6 864.546 216.254   7
   0  14  -6 878.778 194.837  16
   0  14  -6 997.715 234.755  14
   0  14  -7 1689.91 263.511  14
   0  14  -7 1529.21 240.433   7
   0  14  -7 1754.83 254.914  33
   0  14  -7 1566.54 220.124  16
   0  14  -8 428.556 125.086  16
   0  14  -8 357.584 121.745   7
   0  14  -8 274.372 109.268  33
   0  14  -9 22.3592 81.5058  16
   0  14 -10 226.966 79.2139  16
   0  15   0-8.29689 155.087  14
   0  15   0-113.177 154.425  33
   0  15  -1 1339.01 230.420  33
   0  15   1 970.868 207.223  33
   0  15   1 1311.05 257.454  14
   0  15  -1 1133.25 278.893  14
   0  15  -2 43.7501 161.284  14
   0  15   2 88.2469 102.207  33
   0  15  -2 194.453 130.514  33
   0  15   3 1338.15 220.687  33
   0  15  -3 1660.36 258.822  33
   0  15  -3 1792.15 311.085   7
   0  15  -3 1511.57 291.375  14
   0  15  -4 865.446 232.708   7
   0  15   4 649.857 158.432  33
   0  15  -4 1137.17 232.492  33
   0  15  -4 1007.47 243.972  14
   0  15  -5 804.069 231.667  14
   0  15   5 847.831 172.228  33
   0  15  -5 837.165 230.578   7
   0  15  -5 1110.20 223.640  33
   0  15  -5 750.064 148.297  16
   0  15  -6 2598.37 253.281  16
   0  15   6 2091.00 265.885  33
   0  15  -6 2715.74 307.175  14
   0  15  -6 2458.08 304.420   7
   0  15  -6 2648.98 300.743  33
   0  15  -7-32.3303 79.0664  16
   0  15  -7 69.3652 84.8609   7
   0  15  -7-63.0329 79.0002  33
   0  15  -8 554.898 117.082   7
   0  15  -8 530.366 109.868  16
   0  16   0 551.653 179.117   7
   0  16   0 741.413 178.530  33
   0  16   0 373.066 162.754  14
   0  16   1 397.819 136.019  33
   0  16  -1 201.312 125.414   7
   0  16  -1 514.844 180.424  14
   0  16   1 457.756 144.681   7
   0  16  -1 386.300 137.296  33
   0  16  -2 1255.58 221.683  33
   0  16   2 1326.64 209.705  33
   0  16  -2 1010.00 220.111  14
   0  16  -2 1429.70 264.111   7
   0  16   2 746.242 152.070   7
   0  16  -3 1552.59 272.579   7
   0  16   3 1105.61 190.346  33
   0  16  -3 1300.25 246.212  14
   0  16  -3 1465.75 229.847  33
   0  16  -4 661.871 188.000   7
   0  16  -4 467.857 151.305  33
   0  16  -4 408.318 169.644  14
   0  16   4 475.198 139.269  33
   0  16  -5 608.867 173.978   7
   0  16  -5 760.125 165.004  33
   0  16   5 517.848 136.810  33
   0  16  -5 808.689 178.213  14
   0  16  -6 501.099 129.694  33
   0  16  -6 225.591 112.753   7
   0  16  -7 562.559 125.520   7
   0  17   0-93.5857 89.1172  33
   0  17   0-98.7972 100.309   7
   0  17  -1 687.208 145.371  33
   0  17   1 860.234 160.294   7
   0  17  -1 504.406 135.955  14
   0  17   1 588.213 151.802  33
   0  17  -1 668.175 163.936   7
   0  17  -2 115.483 101.420  33
   0  17   2 203.530 93.2212  33
   0  17  -2 101.377 113.368   7
   0  17  -2 177.032 110.029  14
   0  17  -3 208.292 99.9852  33
   0  17  -3 317.070 137.943  14
   0  17  -3 361.368 139.065   7
   0  17   3 168.368 99.7806  33
   0  17  -4 510.026 126.150  14
   0  17  -4 229.782 113.847   7
   0  17  -5-31.8715 78.1973   7
   0  18  -1 284.830 96.0273   7
   0  18  -2 201.255 85.2564   7
  -1 -18   2 2368.98 207.793   5
  -1 -18   1 2574.19 216.140   5
   1 -18   0-31.6691 66.5176   5
  -1 -18   0 74.9307 58.2767   5
   1 -18   1-56.5218 72.6749   5
   1 -18   2 123.736 67.3370   5
   1 -17  -6 621.245 140.068  28
  -1 -17   5 477.240 109.224   5
   1 -17  -5 167.260 95.5685  28
  -1 -17   4 290.848 101.744   5
   1 -17  -4 294.838 118.138  28
   1 -17  -3 1030.94 190.055  28
  -1 -17   3 1006.66 170.630   5
  -1 -17   3 1027.51 146.437  10
   1 -17  -2 67.2745 74.0041   5
   1 -17  -2 81.4674 107.478  28
  -1 -17   2 84.2840 89.1268   5
  -1 -17   1 1526.78 204.149  28
   1 -17  -1 1853.72 229.622  28
  -1 -17   1 1784.09 221.365   5
   1 -17  -1 1890.82 219.308   5
  -1 -17   0 2469.51 261.703  28
   1 -17   0 2427.35 250.785   5
   1 -17   0 1968.87 207.298  28
  -1 -17   0 2670.87 259.925   5
   1 -17   1 108.128 99.2740   5
  -1 -17  -1 89.4724 77.7146   5
  -1 -17  -1 141.412 106.944  28
  -1 -17  -2-54.0155 107.142  28
  -1 -17  -2-82.5577 62.5640   5
   1 -17   2 6.97869 102.004   5
   1 -17   3 291.380 111.946   5
  -1 -17  -3 249.901 121.717  28
  -1 -17  -4-46.8324 81.1116  28
   1 -17   4 156.982 91.5370   5
   1 -17   5 169.249 78.3539   5
  -1 -17  -5 169.668 82.0650  28
   1 -16  -8 553.338 126.012  28
  -1 -16   7 397.672 90.7905   5
   1 -16  -7 522.765 152.997  28
  -1 -16   6 2112.65 213.300   5
   1 -16  -6 2389.80 279.344  28
  -1 -16   5 245.296 93.5485  24
   1 -16  -5 484.258 159.477  28
  -1 -16   5 394.587 125.105   5
  -1 -16   4 1936.50 242.250  24
  -1 -16   4 2269.27 251.375   5
   1 -16  -4 2548.75 306.444  28
  -1 -16   3 747.129 175.775   5
  -1 -16   3 549.792 134.205  24
   1 -16  -3 866.677 196.080  28
   1 -16  -3 290.801 100.746   5
  -1 -16   2 1964.33 243.295  28
   1 -16  -2 1738.66 258.713  28
  -1 -16   2 1958.30 253.833   5
  -1 -16   2 1701.39 236.108  24
   1 -16  -2 1818.23 228.505   5
  -1 -16   1-43.2939 116.175   5
  -1 -16   1-23.1699 109.884  28
  -1 -16   1-46.5372 76.1856  24
   1 -16  -1 28.5683 102.905   5
   1 -16  -1-149.842 132.550  28
  -1 -16   0-19.7932 59.7391  24
  -1 -16   0 380.642 148.714  28
  -1 -16   0 317.540 132.550   5
   1 -16   0 393.172 137.683  28
   1 -16   0 543.306 161.959   5
  -1 -16  -1 507.886 131.549   5
  -1 -16  -1 330.838 116.284  24
   1 -16   1 526.897 161.399   5
  -1 -16  -1 365.906 149.791  28
  -1 -16  -2-154.818 100.898  24
   1 -16   2-25.5912 108.243   5
  -1 -16  -2-27.7883 136.556  28
  -1 -16  -2-47.4100 77.9088   5
   1 -16   3 513.705 149.680   5
  -1 -16  -3 294.197 113.147  24
  -1 -16  -3 589.929 180.012  28
  -1 -16  -3 265.166 88.2520   5
   1 -16   4 1792.69 225.498   5
  -1 -16  -4 1577.18 240.495  28
  -1 -16  -5 662.965 155.384  28
   1 -16   5 680.441 145.376   5
   1 -16   6 401.696 102.631   5
  -1 -16  -6 557.297 145.716  28
  -1 -16  -7 445.215 114.625  28
   1 -15  -9 290.166 116.815  28
  -1 -15   9-2.94777 65.0509   6
  -1 -15   8 2550.23 229.491   6
  -1 -15   8 1976.16 223.686  24
   1 -15  -8 2624.80 282.519  28
   1 -15  -7 2235.92 288.611  28
  -1 -15   7 1942.62 236.919  24
  -1 -15   7 2168.09 220.610   6
  -1 -15   7 2284.32 223.484   5
   1 -15  -6 383.478 166.923  28
  -1 -15   6 238.147 118.191  24
  -1 -15   6 348.338 119.605   5
  -1 -15   6 305.489 95.7538   6
  -1 -15   5 1213.60 197.608   5
   1 -15  -5 1657.68 282.939  28
  -1 -15   5 1459.37 234.705  24
   1 -15  -4 1985.69 304.780  28
  -1 -15   4 1798.62 272.401  24
  -1 -15   4 1920.41 257.219   5
  -1 -15   3 2369.63 285.344   5
   1 -15  -3 2223.48 316.002  28
  -1 -15   3 2042.62 243.384  28
  -1 -15   3 2116.47 282.819  24
   1 -15  -3 1406.64 201.813   5
  -1 -15   2 268.464 137.210  24
  -1 -15   2 116.008 105.795  28
   1 -15  -2 96.2064 131.953  28
  -1 -15   2 131.372 137.286   5
   1 -15  -2 87.2355 108.764   5
  -1 -15   1 1131.09 217.343  24
  -1 -15   1 1150.41 212.490   5
  -1 -15   1 854.935 197.589  28
   1 -15  -1 977.594 196.328   5
   1 -15  -1 1042.20 211.984  28
  -1 -15   0 805.949 200.371  28
   1 -15   0 690.624 166.719  28
  -1 -15   0 1101.91 221.960  24
  -1 -15   0 812.718 188.466   5
   1 -15   0 701.311 187.643   5
   1 -15   1 5075.72 417.074   5
   1 -15   1 4151.92 345.286  28
  -1 -15  -1 5180.57 404.843   5
  -1 -15  -1 5005.63 433.605  28
  -1 -15  -1 5261.69 454.553  24
  -1 -15  -2 3967.86 335.455   5
  -1 -15  -2 4060.12 396.748  28
   1 -15   2 4599.93 399.897   5
  -1 -15  -2 4385.59 400.644  24
  -1 -15  -3 130.740 159.354  28
  -1 -15  -3 176.113 89.0103   5
  -1 -15  -3 370.770 157.743  24
   1 -15   3 362.063 166.561   5
  -1 -15  -4 2866.24 320.510  24
   1 -15   4 2900.84 303.328   5
  -1 -15  -4 2559.21 321.644  28
   1 -15   5 239.580 127.953   5
  -1 -15  -5 365.755 138.091  24
  -1 -15  -5 123.017 128.651  28
  -1 -15  -6 785.575 161.249  24
   1 -15   6 848.472 151.064   5
  -1 -15  -6 717.388 182.103  28
   1 -15   6 364.277 92.4605   6
  -1 -15  -7 1232.14 191.710  28
   1 -15   7 880.977 137.894   6
   1 -15   7 1402.27 170.929   5
   1 -15   8 467.416 104.498   6
  -1 -15  -8 179.732 91.2743  28
   1 -14 -10 2939.47 247.911  28
  -1 -14  10 3118.19 248.692   6
   1 -14  -9 2695.48 283.387  28
  -1 -14   9 2932.81 263.017   6
  -1 -14   8 11.1667 74.0512   5
   1 -14  -8 122.185 126.531  28
  -1 -14   8 282.263 112.081   6
  -1 -14   7 3873.88 326.482   6
  -1 -14   7 3478.10 288.200   5
   1 -14  -7 3626.26 389.739  28
   1 -14  -6 2345.64 341.194  28
  -1 -14   6 2526.04 271.518   6
  -1 -14   6 2210.62 306.737  24
  -1 -14   6 2404.07 263.876   5
   1 -14  -5 2673.74 360.956  28
  -1 -14   5 2244.17 251.555   6
  -1 -14   5 2378.95 320.143  24
  -1 -14   5 2413.69 278.044   5
  -1 -14   4 14168.4 753.535  24
   1 -14  -4 13057.9 732.623  28
  -1 -14   4 13205.9 632.756   5
  -1 -14   3 6369.43 500.263  24
  -1 -14   3 6582.92 463.693   5
  -1 -14   3 6980.78 459.062  28
   1 -14  -3 6054.21 503.339  28
  -1 -14   2 41.2721 156.202   5
   1 -14  -2 20.3027 107.504   5
  -1 -14   2 96.5691 111.357  28
   1 -14  -2 6.96166 145.540  28
  -1 -14   2-331.882 162.689  24
  -1 -14   1 1512.68 271.058  24
   1 -14  -1 1315.88 242.446  28
  -1 -14   1 1604.58 259.119   5
   1 -14  -1 1645.34 249.889   5
  -1 -14   1 1417.24 247.493  28
   1 -14   0 10344.0 592.774  28
  -1 -14   0 11781.7 620.217   5
   1 -14   0 11405.5 619.787   5
  -1 -14   0 10783.5 631.959  28
  -1 -14   0 12360.0 710.371  24
  -1 -14  -1 14994.3 684.360   5
  -1 -14  -1 14053.7 719.886  28
   1 -14   1 13665.6 650.309  28
  -1 -14  -1 16050.6 777.200  24
   1 -14   1 14818.5 708.270   5
  -1 -14  -2-61.3445 142.420  24
  -1 -14  -2 40.2995 106.416   5
   1 -14   2-28.8981 130.799  27
   1 -14   2-31.0631 153.767   5
  -1 -14  -2 2.68743 157.694  28
   1 -14   3 1949.54 285.242  27
  -1 -14  -3 1927.97 298.211  28
  -1 -14  -3 2073.07 298.108  24
   1 -14   3 1866.98 277.144   5
  -1 -14  -3 1215.99 185.734   5
  -1 -14  -4 99.7945 155.029  28
   1 -14   4 157.900 123.303   5
  -1 -14  -4 381.467 157.949  24
   1 -14   4 97.5681 129.657  27
   1 -14   5 2712.41 325.364  27
  -1 -14  -5 2685.43 337.975  28
  -1 -14  -5 2852.29 331.909  24
   1 -14   5 2031.75 256.871   5
   1 -14   5 1656.88 208.610   6
   1 -14   6 2396.03 295.320  27
   1 -14   6 2177.07 241.510   6
   1 -14   6 2135.08 243.737   5
  -1 -14  -6 2362.50 311.897  28
  -1 -14  -6 2633.43 317.506  24
  -1 -14  -7 260.887 130.574  28
   1 -14   7 233.151 119.428  27
   1 -14   7 153.731 103.513   5
   1 -14   7 282.708 109.383   6
  -1 -14  -7 415.623 142.565  24
  -1 -14  -8 908.028 168.487  24
  -1 -14  -8 831.867 165.397  28
   1 -14   8 1226.59 176.052   6
   1 -14   9 64.9894 75.4205   6
  -1 -13  11 1548.56 182.767   6
   1 -13 -10 1684.01 215.766  28
  -1 -13  10 2033.42 231.447   6
  -1 -13   9 898.864 174.482   6
   1 -13  -9 565.463 173.958  28
  -1 -13   8 2348.76 272.952   6
   1 -13  -8 2225.25 311.826  28
  -1 -13   8 2057.18 219.561   5
  -1 -13   7 2672.69 267.161   5
  -1 -13   7 2579.10 284.992   6
   1 -13  -7 2434.20 337.224  28
  -1 -13   6 3343.24 321.104   6
  -1 -13   6 3460.67 311.795   5
   1 -13  -6 3903.22 426.937  28
   1 -13  -5 2859.66 371.910  28
  -1 -13   5 2669.70 287.805   5
  -1 -13   5 2677.57 286.186   6
   1 -13  -4 2003.37 306.557  28
   1 -13  -4 2148.48 233.372   5
  -1 -13   4 2355.73 258.853   6
  -1 -13   4 2130.58 267.549   5
  -1 -13   3 966.075 187.796  28
  -1 -13   3 729.880 185.125   5
  -1 -13   3 973.577 233.511  24
   1 -13  -3 853.819 222.979  28
   1 -13  -3 667.555 149.333   5
   1 -13  -2 3591.93 381.476  28
   1 -13  -2 4062.42 553.316  18
  -1 -13   2 4257.98 423.794  24
   1 -13  -2 3930.24 343.774   5
  -1 -13   2 3866.88 360.729   5
  -1 -13   2 3988.33 372.250  28
   1 -13  -1 16354.7 756.717  28
   1 -13  -1 17100.4 718.642   5
  -1 -13   1 18781.8 857.240  24
  -1 -13   1 17953.4 753.027   5
  -1 -13   1 16535.7 749.047  28
   1 -13   0 5749.28 442.132  28
   1 -13   0 5130.88 632.401  18
  -1 -13   0 6435.08 496.280  24
  -1 -13   0 5548.23 452.553  28
   1 -13   0 6359.42 459.057   5
  -1 -13   0 6031.53 444.052   5
  -1 -13  -1 1807.43 284.418  24
   1 -13   1 1661.22 241.939  28
   1 -13   1 1409.70 242.602   5
   1 -13   1 2001.19 403.161  18
   1 -13   1 1478.01 249.925  27
  -1 -13  -1 1584.65 265.318  28
  -1 -13  -1 1542.43 232.786   5
  -1 -13  -2 16172.4 787.231  24
  -1 -13  -2 14303.7 735.542  28
   1 -13   2 16000.6 749.405  27
   1 -13   2 15289.4 697.486   5
  -1 -13  -2 14700.4 646.188   5
  -1 -13  -3 2809.68 352.956  28
  -1 -13  -3 2185.19 250.447   5
   1 -13   3 2972.76 342.562  27
   1 -13   3 2797.48 313.044   5
  -1 -13  -3 2915.39 348.458  24
  -1 -13  -4 821.589 157.948   5
   1 -13   4 1184.93 194.905   6
  -1 -13  -4 1240.35 248.417  24
   1 -13   4 1042.90 202.728   5
   1 -13   4 1043.01 221.179  27
  -1 -13  -4 938.302 227.459  28
   1 -13   5 797.421 177.840   5
   1 -13   5 975.714 180.318   6
   1 -13   5 898.159 211.255  27
  -1 -13  -5 815.339 215.500  28
  -1 -13  -5 906.197 216.125  24
   1 -13   6 188.921 138.571  27
  -1 -13  -6 216.710 137.063  24
   1 -13   6 163.348 119.584   6
  -1 -13  -6 127.708 132.220  28
   1 -13   6 273.622 127.929   5
   1 -13   7 1762.90 220.957   5
  -1 -13  -7 2084.27 296.397  24
   1 -13   7 2016.46 268.378  27
   1 -13   7 1822.23 249.400   6
  -1 -13  -7 1679.30 260.427  28
  -1 -13  -8 741.162 167.222  28
  -1 -13  -8 1036.73 214.674  24
   1 -13   8 1031.71 187.699  27
   1 -13   8 828.643 169.546   6
   1 -13   8 804.738 144.680   5
  -1 -13  -9 48.2510 127.061  24
   1 -13   9 155.539 101.493   6
  -1 -13  -9-136.261 89.3974  28
   1 -13   9 85.4414 82.2919  27
   1 -13  10 124.796 84.8559   6
  -1 -13 -10-304.088 108.205  24
  -1 -12  12 137.034 75.4679   6
  -1 -12  11 1676.01 212.060   6
  -1 -12  10 3115.54 299.428   6
   1 -12 -10 2679.02 286.467  28
  -1 -12   9 2799.32 298.079   6
   1 -12  -9 2573.64 316.880  28
   1 -12  -8 2578.44 338.610  28
  -1 -12   8 2612.30 249.713   5
  -1 -12   8 2610.66 287.997  27
  -1 -12   8 2681.67 296.805   6
  -1 -12   7 1627.09 208.210   5
  -1 -12   7 1740.79 250.326   6
   1 -12  -7 1851.00 305.028  28
  -1 -12   7 1680.72 237.512  27
  -1 -12   6 1538.62 215.721   5
  -1 -12   6 1863.20 257.202  27
   1 -12  -6 1680.77 300.629  28
  -1 -12   6 1782.61 248.745   6
  -1 -12   5 2513.53 297.666  27
  -1 -12   5 2487.28 272.458   6
   1 -12  -5 2143.65 318.238  28
   1 -12  -5 1742.18 365.059  18
  -1 -12   5 2509.40 272.659   5
  -1 -12   4 2118.57 247.717  28
   1 -12  -4 2118.01 309.161  28
  -1 -12   4 2052.96 239.392   6
   1 -12  -4 2168.17 228.954   5
  -1 -12   4 2340.94 263.419   5
   1 -12  -4 1610.72 375.794  18
  -1 -12   4 2127.59 276.660  27
  -1 -12   3 12050.5 626.605  27
  -1 -12   3 11684.3 579.470   5
  -1 -12   3 11298.4 580.000  28
   1 -12  -3 10612.9 869.527  18
   1 -12  -3 10798.1 517.037   5
   1 -12  -3 10230.6 615.593  28
  -1 -12   2 10928.5 561.099   5
  -1 -12   2 11736.3 662.290  24
  -1 -12   2 9976.46 558.013  28
   1 -12  -2 9809.21 590.407  28
   1 -12  -2 9765.00 511.000   5
   1 -12  -2 8990.01 790.660  18
  -1 -12   1 1696.80 268.464  24
   1 -12  -1 1429.78 234.648  28
   1 -12  -1 1418.42 327.098  18
  -1 -12   1 1857.30 251.177   5
   1 -12  -1 1532.43 219.288   5
  -1 -12   1 1699.95 251.683  28
   1 -12   0 10521.5 553.817  27
  -1 -12   0 11231.5 625.834  24
  -1 -12   0 9733.12 563.967  28
   1 -12   0 9871.99 532.794   5
  -1 -12   0 10957.8 558.079   5
   1 -12   0 9819.44 554.215  28
  -1 -12  -1 7485.51 458.416   5
  -1 -12  -1 6993.25 490.419  28
   1 -12   1 7273.85 475.431  27
  -1 -12  -1 8431.90 540.696  24
   1 -12   1 7275.38 461.308   5
   1 -12   1 6732.99 442.203  28
   1 -12   2 7333.06 490.342  27
   1 -12   2 6742.09 472.938  24
  -1 -12  -2 6623.61 423.132   5
  -1 -12  -2 6229.44 472.453  28
  -1 -12  -2 6886.62 498.476  24
   1 -12   2 6690.60 441.330   5
   1 -12   3 8675.52 456.152   6
   1 -12   3 12413.0 598.544   5
  -1 -12  -3 11888.5 659.550  28
  -1 -12  -3 10947.2 524.582   5
  -1 -12  -3 12824.8 680.150  24
   1 -12   3 13085.7 666.747  27
   1 -12   3 9177.86 847.448  18
   1 -12   4 7779.88 457.994   6
   1 -12   4 7850.42 528.823  27
  -1 -12  -4 6923.09 402.078   5
   1 -12   4 7868.37 475.180   5
  -1 -12  -4 7703.39 547.085  24
   1 -12   4 5899.09 669.021  18
  -1 -12  -4 7086.15 521.181  28
   1 -12   5 3781.82 372.644  27
  -1 -12  -5 4241.68 417.175  24
  -1 -12  -5 3523.78 379.972  28
   1 -12   5 3650.58 329.236   6
   1 -12   5 3472.56 323.285   5
  -1 -12  -6 116.047 139.641  28
   1 -12   6 75.3554 90.1147   5
   1 -12   6 120.774 114.704  27
   1 -12   6 152.625 119.177   6
  -1 -12  -6 5.36462 131.804  24
   1 -12   7 317.706 141.039  27
   1 -12   7 192.915 107.614   5
  -1 -12  -7 0.98709 139.239  24
  -1 -12  -7 227.317 137.032  28
   1 -12   7 355.321 141.660   6
  -1 -12  -8 1181.48 212.954  28
  -1 -12  -8 1251.45 253.687  24
   1 -12   8 1151.34 161.836   5
   1 -12   8 1297.46 207.341  27
   1 -12   8 1232.86 213.031   6
   1 -12   9 144.013 91.0831  27
  -1 -12  -9 154.889 105.189  28
   1 -12   9 53.9935 101.829   6
  -1 -12  -9-56.1038 145.009  24
  -1 -12 -10 952.931 204.456  24
   1 -12  10 1043.46 178.339   6
   1 -12  10 760.394 139.347  27
  -1 -12 -11 225.698 105.443  24
   1 -12  11 654.256 129.708   6
  -1 -11  13 136.084 78.9019   6
  -1 -11  12 239.086 108.884   6
  -1 -11  11 103.905 98.3566   6
   1 -11 -10 622.726 172.634  28
  -1 -11  10 592.167 164.134   6
  -1 -11   9 1806.33 255.221   6
   1 -11  -9 1877.92 285.290  28
  -1 -11   9 1464.27 208.118  27
  -1 -11   8 3529.55 343.859   6
   1 -11  -8 2788.85 314.306  24
   1 -11  -8 3076.54 365.322  28
  -1 -11   8 2827.51 294.957  27
  -1 -11   8 2814.75 257.152   5
  -1 -11   7 1268.35 185.842   5
  -1 -11   7 1285.88 202.347  27
   1 -11  -7 1603.86 283.826  28
   1 -11  -7 1170.93 210.996  24
  -1 -11   7 1697.97 237.307   6
   1 -11  -6 3315.27 506.662  18
   1 -11  -6 2966.45 367.457  28
  -1 -11   6 3126.53 306.684   6
  -1 -11   6 2786.68 297.174  27
  -1 -11   6 2714.07 266.478   5
   1 -11  -5 2091.68 305.783  28
  -1 -11   5 2060.10 258.165  27
   1 -11  -5 1910.39 378.824  18
  -1 -11   5 2150.10 247.874   6
  -1 -11   5 2091.02 239.709   5
  -1 -11   4 15675.5 627.810   5
   1 -11  -4 14843.1 994.295  18
   1 -11  -4 15344.8 609.245  29
  -1 -11   4 15571.1 615.424   6
   1 -11  -4 15010.6 736.490  28
  -1 -11   4 16410.0 691.942  27
  -1 -11   4 14795.9 606.818  28
  -1 -11   3 26135.9 833.563  28
  -1 -11   3 18169.0 636.158   6
   1 -11  -3 25517.6 925.029  28
   1 -11  -3 23665.1 1238.69  18
  -1 -11   3 26127.5 812.317   5
   1 -11  -3 17458.4 618.532   5
  -1 -11   3 28272.3 890.790  27
   1 -11  -3 19721.8 701.007  29
   1 -11  -2 728.568 145.922  29
  -1 -11   2 798.586 132.840   6
  -1 -11   2 779.214 163.368   5
   1 -11  -2 564.560 225.996  18
  -1 -11   2 773.157 173.696  27
   1 -11  -2 802.514 151.114   5
  -1 -11   2 531.905 152.446  28
   1 -11  -2 688.656 174.061  28
   1 -11  -1 5525.61 367.543   5
   1 -11  -1 6254.53 411.113  29
   1 -11  -1 5804.01 617.034  18
  -1 -11   1 6222.53 448.448  24
  -1 -11   1 5945.36 392.826   5
   1 -11  -1 5473.25 404.061  28
   1 -11  -1 5306.57 364.381  27
  -1 -11   1 6122.01 422.539  28
  -1 -11   0 10274.2 509.747   5
   1 -11   0 7929.84 739.488  18
   1 -11   0 8517.02 486.604  28
  -1 -11   0 9142.60 517.162  28
  -1 -11   0 10235.0 567.589  24
   1 -11   0 9479.04 493.309  27
   1 -11   0 9016.59 471.948   5
   1 -11   0 9624.88 511.762  29
   1 -11   0 8770.53 486.875  24
  -1 -11  -1 965.248 176.424   5
  -1 -11  -1 777.239 212.458  18
   1 -11   1 1015.78 182.835  27
   1 -11   1 949.312 182.781  29
  -1 -11  -1 984.735 187.422  24
  -1 -11  -1 923.947 186.433  28
   1 -11   1 1081.18 178.240  28
   1 -11   1 741.760 167.784  24
   1 -11   1 544.282 225.063  18
  -1 -11  -2 1004.47 206.953  24
  -1 -11  -2 644.524 186.538  18
   1 -11   2 1207.62 311.919  18
   1 -11   2 1191.36 204.653  27
  -1 -11  -2 1201.20 181.731   5
  -1 -11  -2 957.670 205.762  28
   1 -11   2 1154.85 173.137  28
  -1 -11  -3 9670.92 567.326  24
   1 -11   3 10076.8 559.175  27
  -1 -11  -3 6861.13 397.437   5
  -1 -11  -3 8653.35 540.602  28
  -1 -11  -3 7223.06 631.523  18
   1 -11   3 6029.24 703.379  18
   1 -11   3 6378.24 384.737   6
   1 -11   4 18901.1 774.860  27
  -1 -11  -4 19331.3 808.128  24
  -1 -11  -4 17151.2 762.911  28
  -1 -11  -4 12256.9 871.996  18
   1 -11   4 9701.08 926.402  18
   1 -11   4 17762.0 669.324   6
  -1 -11  -4 13534.9 535.004   5
  -1 -11  -4 12814.7 1069.64   1
   1 -11   5 17930.6 762.457  27
   1 -11   5 16556.6 670.631   6
  -1 -11  -5 15441.4 742.279  28
  -1 -11  -5 10585.7 823.104  18
  -1 -11  -5 17117.8 791.190  24
  -1 -11  -5 10804.8 1015.33   1
   1 -11   6 3715.99 314.930   5
   1 -11   6 4542.75 390.352  27
  -1 -11  -6 4055.79 398.046  28
  -1 -11  -6 4286.00 527.744  18
  -1 -11  -6 4524.10 434.169  24
   1 -11   6 4287.48 365.798   6
   1 -11   7 423.657 147.424  27
  -1 -11  -7 321.879 139.239  28
   1 -11   7 325.480 107.768   5
   1 -11   7 434.429 148.452   6
  -1 -11  -7 412.036 176.493  24
  -1 -11  -8 1524.14 280.432  24
   1 -11   8 1618.64 243.614   6
  -1 -11  -8 1127.36 210.000  28
   1 -11   8 1598.38 194.492   5
   1 -11   8 1521.69 227.381  27
   1 -11   9 3298.73 325.841   6
   1 -11   9 2452.00 274.702  27
  -1 -11  -9 3233.63 392.947  24
   1 -11  10 85.4011 107.164   6
   1 -11  10 189.204 91.2873  27
  -1 -11 -10 122.390 134.921  24
  -1 -11 -11 1861.35 265.398  24
   1 -11  11 2615.84 257.486   6
   1 -11  12 948.325 144.282   6
  -1 -11 -12 662.001 140.398  24
  -1 -10  13 170.335 94.2344   6
  -1 -10  13 317.713 95.5083  23
  -1 -10  12 1387.73 188.320  23
  -1 -10  12 2507.45 262.490   6
  -1 -10  11 4774.29 380.134  23
   1 -10 -11 5478.97 441.742  24
  -1 -10  10 4303.09 327.674  27
   1 -10 -10 5197.52 416.990  28
  -1 -10  10 5757.54 432.623   6
   1 -10 -10 5543.38 451.201  24
  -1 -10  10 5860.70 436.127  23
  -1 -10   9 1633.57 240.654  23
  -1 -10   9 929.779 165.995  27
   1 -10  -9 1182.68 232.970  28
  -1 -10   9 1274.75 225.425   6
   1 -10  -9 1458.25 247.301  24
  -1 -10   8 255.728 128.457   6
   1 -10  -8 424.492 218.011  18
   1 -10  -8 52.7986 148.971  28
  -1 -10   8 310.446 111.574  27
   1 -10  -8 262.241 116.854  24
  -1 -10   8 175.152 102.660  23
   1 -10  -7 4378.43 565.727  18
  -1 -10   7 4359.39 355.178   6
  -1 -10   7 4386.81 350.321  27
  -1 -10   7 3982.30 300.554   5
   1 -10  -7 2866.69 302.906  24
   1 -10  -7 4222.54 415.767  28
   1 -10  -6 6387.15 671.932  18
   1 -10  -6 6010.24 475.840  28
  -1 -10   6 5839.62 364.027   5
  -1 -10   6 6040.53 398.631   6
   1 -10  -6 4641.32 358.312  24
  -1 -10   6 6006.74 404.551  27
   1 -10  -5 11754.1 645.235  28
   1 -10  -5 9981.08 502.350  24
  -1 -10   5 11912.1 536.727   6
  -1 -10   5 12076.4 567.366  27
  -1 -10   5 12036.6 517.182   5
   1 -10  -5 11572.6 874.663  18
   1 -10  -4 1744.06 260.539  28
   1 -10  -4 1304.09 156.401   5
  -1 -10   4 2388.66 256.194  27
   1 -10  -4 1563.52 183.310  29
   1 -10  -4 1968.68 219.483  24
  -1 -10   4 1940.40 214.808   6
  -1 -10   4 1855.89 213.187   5
  -1 -10   4 1699.72 200.242  28
   1 -10  -4 1502.65 316.910  18
   1 -10  -3 18603.8 742.602  28
  -1 -10   3 19251.4 648.278   5
   1 -10  -3 11843.7 474.585   5
  -1 -10   3 18457.7 653.136  28
  -1 -10   3 20037.6 705.300  27
  -1 -10   3 13109.3 513.389   6
   1 -10  -3 17418.9 606.016  24
   1 -10  -3 12355.0 513.693  29
  -1 -10   3 17506.5 910.679  18
   1 -10  -3 16646.9 988.878  18
  -1 -10   2 5785.81 363.311   5
  -1 -10   2 5994.98 380.043  27
   1 -10  -2 5155.90 389.590  28
   1 -10  -2 5074.14 326.996  24
   1 -10  -2 5199.84 341.701  29
   1 -10  -2 5174.85 555.877  18
  -1 -10   2 5415.16 363.101  28
  -1 -10   2 5283.52 307.947   6
   1 -10  -2 4870.10 317.243   5
  -1 -10   2 4396.43 453.864  18
   1 -10  -1 1501.92 205.693  28
  -1 -10   1 1810.14 232.363  24
  -1 -10   1 1739.35 216.652  28
   1 -10  -1 1828.22 209.020  29
   1 -10  -1 1150.06 156.644  27
  -1 -10   1 1736.33 212.326  27
  -1 -10   1 1877.83 210.852   5
  -1 -10   1 917.641 215.421  18
   1 -10  -1 1280.91 167.477  24
   1 -10  -1 1652.86 326.034  18
   1 -10   0 5969.13 374.304  29
  -1 -10   0 6342.93 376.721   5
   1 -10   0 5546.90 350.860  24
  -1 -10   0 5591.49 380.755  28
   1 -10   0 5279.59 569.059  18
  -1 -10   0 6228.39 412.564  24
   1 -10   0 5995.21 370.328  27
   1 -10   0 5329.50 361.343  28
  -1 -10  -1 20010.5 657.514   5
   1 -10   1 21176.1 710.654  29
   1 -10   1 19800.9 689.256  27
  -1 -10  -1 19576.3 720.337  24
   1 -10   1 18730.3 1103.10  18
  -1 -10  -1 18357.6 694.999  28
   1 -10   1 17886.1 637.366  28
   1 -10   2 1267.26 185.506  29
  -1 -10  -2 1109.64 168.351   5
  -1 -10  -2 844.275 172.427  28
  -1 -10  -2 1111.71 187.134  24
   1 -10   2 1235.55 304.462  18
   1 -10   2 1072.40 178.952  27
   1 -10   2 916.225 134.165   6
  -1 -10  -2 1086.96 246.855  18
   1 -10   3 7176.42 388.283   6
   1 -10   3 10956.4 550.316  27
  -1 -10  -3 9783.08 722.854  18
  -1 -10  -3 9321.44 521.260  28
  -1 -10  -3 6309.54 698.987   1
  -1 -10  -3 6760.92 368.928   5
  -1 -10  -3 9447.97 527.713  24
   1 -10   3 9749.87 859.747  18
   1 -10   4 14968.2 585.208   6
  -1 -10  -4 15452.6 694.670  24
   1 -10   4 16136.7 681.516  27
  -1 -10  -4 15221.8 531.430   5
  -1 -10  -4 14813.8 676.012  28
  -1 -10  -4 13011.3 1092.16   1
  -1 -10  -4 15813.7 948.629  18
   1 -10   5 1411.55 218.582  27
  -1 -10  -5 1177.46 309.020  18
  -1 -10  -5 1276.08 221.671  28
  -1 -10  -5 1268.62 227.080  24
  -1 -10  -5 1343.18 382.690   1
   1 -10   5 1479.95 209.291   6
  -1 -10  -6 12765.8 689.425  24
  -1 -10  -6 11172.9 1107.94   1
   1 -10   6 12949.0 597.645   6
   1 -10   6 12852.4 629.876  27
  -1 -10  -6 11836.3 636.347  28
   1 -10   7 619.610 273.329  19
  -1 -10  -7 1101.92 381.243   1
  -1 -10  -7 807.903 194.553  28
   1 -10   7 879.159 189.153   6
   1 -10   7 1068.61 205.472  27
  -1 -10  -7 745.039 163.276  12
  -1 -10  -7 1152.05 286.629  18
   1 -10   7 693.984 144.768   5
  -1 -10  -7 958.772 234.429  24
  -1 -10  -8 2383.17 283.431  28
   1 -10   8 2029.43 262.623  27
  -1 -10  -8 2114.68 330.136  24
   1 -10   8 2237.32 282.411   6
   1 -10   9 4205.13 373.171   6
  -1 -10  -9 4663.59 473.914  24
  -1 -10 -10 847.984 231.470  24
   1 -10  10 1151.62 212.886   6
   1 -10  10 687.322 144.458  27
  -1 -10 -11-109.658 89.3891  13
  -1 -10 -11 70.1050 122.491  24
  -1 -10 -12 1083.49 205.321  24
   1 -10  12 1437.23 187.700   6
  -1  -9  14 585.944 109.509  23
  -1  -9  14 403.100 92.5593   6
  -1  -9  13 574.407 126.799   6
   1  -9 -13 653.372 148.237  24
  -1  -9  13 585.000 134.570  23
  -1  -9  12 97.6844 99.3721  23
   1  -9 -12 84.3593 98.6178  24
  -1  -9  12 132.287 105.255   6
  -1  -9  11 1200.17 219.435  23
  -1  -9  11 1145.21 212.214   6
   1  -9 -11 1175.58 228.283  24
  -1  -9  10 711.782 177.775   6
   1  -9 -10 665.163 172.356  28
  -1  -9  10 533.106 154.094  23
   1  -9 -10 631.062 184.571  24
  -1  -9   9 3979.08 319.701  27
  -1  -9   9 4983.78 423.617  23
   1  -9  -9 3710.93 372.375  24
   1  -9  -9 4078.35 391.394  28
  -1  -9   9 5096.64 393.022   6
   1  -9  -8 8077.46 515.836  24
  -1  -9   8 8154.73 804.259  32
  -1  -9   8 8557.47 523.474  23
   1  -9  -8 10360.6 613.587  28
  -1  -9   8 11570.2 567.955   6
  -1  -9   8 10364.8 510.406  27
   1  -9  -8 10139.2 1036.19   1
   1  -9  -8 11549.8 934.279  18
  -1  -9   7 4365.50 341.450   6
   1  -9  -7 4923.19 590.964  18
  -1  -9   7 3277.31 311.598  23
  -1  -9   7 3287.08 522.359  32
   1  -9  -7 1738.69 455.218   1
   1  -9  -7 4238.39 396.507  28
  -1  -9   7 2733.01 236.307   5
   1  -9  -7 3056.50 302.947  24
  -1  -9   7 3978.57 318.693  27
   1  -9  -6 5287.71 736.449   1
   1  -9  -6 5601.49 439.818  28
  -1  -9   6 6444.76 391.897   6
  -1  -9   6 6456.84 395.068  27
  -1  -9   6 6167.48 352.311   5
  -1  -9   6 5909.33 647.154  32
   1  -9  -6 6272.59 646.668  18
   1  -9  -6 4186.52 322.544  24
  -1  -9   6 5910.83 390.831  23
   1  -9  -5 9537.14 918.224   1
  -1  -9   5 10910.7 501.489  27
   1  -9  -5 9335.42 458.654  24
  -1  -9   5 10070.0 442.065   5
  -1  -9   5 8438.20 725.930  32
   1  -9  -5 9920.89 766.446  18
   1  -9  -5 9826.43 555.964  28
  -1  -9   5 11210.2 491.898   6
  -1  -9   4 37861.4 912.929  27
   1  -9  -4 35418.6 1002.27  28
  -1  -9   4 35040.7 1307.90  18
  -1  -9   4 36209.7 825.144   5
  -1  -9   4 37477.5 856.509   6
   1  -9  -4 37070.2 1435.58  18
   1  -9  -3 19605.9 1015.36  18
  -1  -9   3 21107.2 630.721   5
  -1  -9   3 19734.1 648.879  27
   1  -9  -3 20181.6 598.690  29
  -1  -9   3 15062.4 512.924   6
   1  -9  -3 20361.8 563.282   5
  -1  -9   3 19932.5 942.244  18
  -1  -9   3 20618.6 634.508  28
  -1  -9   3 23449.2 1085.93  32
   1  -9  -3 17110.5 670.350  28
  -1  -9   2 15593.1 801.222  18
  -1  -9   2 15362.6 557.832  28
   1  -9  -2 14886.9 520.978  29
   1  -9  -2 19640.6 998.449  18
  -1  -9   2 23240.2 686.310  27
  -1  -9   2 21959.3 643.012   5
  -1  -9   2 23016.1 1022.83  32
   1  -9  -2 15531.8 614.050  28
  -1  -9   1 1986.61 203.814  27
  -1  -9   1 1942.80 196.200   5
  -1  -9   1 1347.64 241.031  18
   1  -9  -1 1483.66 285.830  18
   1  -9  -1 1208.44 158.946  29
  -1  -9   1 1524.37 188.492  28
   1  -9  -1 1132.13 168.241  28
  -1  -9   0 16343.9 557.058  27
   1  -9   0 18795.9 1009.50  18
  -1  -9   0 22529.5 640.251   5
  -1  -9   0 19161.4 648.284  28
   1  -9   0 15852.9 544.214  27
  -1  -9   0 15555.3 604.376  24
   1  -9   0 22640.2 659.842  29
  -1  -9   0 20540.5 894.927  18
   1  -9   0 18476.6 621.739  28
  -1  -9  -1 148.358 78.9722  28
   1  -9   1 381.425 183.087  18
   1  -9   1 214.035 75.5767  27
   1  -9   1 249.562 84.6402  29
  -1  -9  -1 216.139 84.2833   5
  -1  -9  -1 164.380 105.409  18
  -1  -9  -1 0.60661 60.6857   1
  -1  -9  -1-74.9395 64.2573  24
  -1  -9  -2 15146.0 588.788  24
  -1  -9  -2 9278.41 759.294   1
   1  -9   2 13799.3 556.177  27
   1  -9   2 15261.5 574.123  29
  -1  -9  -2 10722.6 434.970   5
  -1  -9  -2 14872.3 596.086  28
  -1  -9  -2 14451.9 799.851  18
   1  -9   2 14936.6 485.930   6
  -1  -9  -3 1568.85 204.949  28
   1  -9   3 2012.24 226.592  27
  -1  -9  -3 1818.31 311.687  18
   1  -9   3 2089.61 225.917  29
   1  -9   3 1297.65 161.771   6
  -1  -9  -3 1815.40 217.225  24
  -1  -9  -3 2101.53 406.728   1
  -1  -9  -3 1752.65 176.468   5
   1  -9   4 3022.28 254.771   6
  -1  -9  -4 3153.04 533.662   1
  -1  -9  -4 2941.30 294.367  28
  -1  -9  -4 3026.48 297.267  24
  -1  -9  -4 2900.96 241.842  12
  -1  -9  -4 3669.74 456.106  18
   1  -9   4 3819.73 315.445  27
  -1  -9  -5 1631.81 323.646  18
  -1  -9  -5 1645.32 230.758  28
   1  -9   5 2640.03 508.630  19
  -1  -9  -5 1797.09 246.868  24
  -1  -9  -5 1427.03 366.611   1
  -1  -9  -5 1631.34 196.649  12
   1  -9   5 1764.96 212.773   6
   1  -9   5 1901.74 230.693  27
  -1  -9  -6 5892.71 624.137  18
   1  -9   6 6238.64 399.490   6
   1  -9   6 6345.29 780.196  19
  -1  -9  -6 5278.09 409.157  28
  -1  -9  -6 3941.87 322.077  12
   1  -9   6 6210.76 418.308  27
  -1  -9  -6 4631.96 743.010   1
  -1  -9  -6 6135.93 456.807  24
   1  -9   7 7210.66 838.327  19
   1  -9   7 6597.96 436.042  27
  -1  -9  -7 5414.38 417.934  28
  -1  -9  -7 6594.06 696.197  18
   1  -9   7 7169.61 448.678   6
  -1  -9  -7 4505.49 370.970  12
  -1  -9  -7 6889.92 517.299  24
  -1  -9  -7 4433.66 768.574   1
  -1  -9  -8 494.652 187.203  24
   1  -9   8 750.698 273.379  19
  -1  -9  -8 234.533 99.3641  28
   1  -9   8 595.162 171.253   6
   1  -9   8 432.293 139.797  27
   1  -9   9 7966.29 508.228   6
  -1  -9  -9 8182.72 603.734  24
  -1  -9 -10 3345.27 405.526  24
   1  -9  10 3522.05 340.027   6
   1  -9  11 1436.64 223.975   6
  -1  -9 -11 1139.84 254.173  24
  -1  -9 -12 452.570 177.993  24
  -1  -9 -12 249.960 113.195  13
   1  -9  12 434.024 128.501   6
  -1  -9 -13 452.463 146.228  24
   1  -9  13 421.806 103.758   6
  -1  -8  14 1710.53 209.929  23
   1  -8 -14 1179.95 181.489  24
  -1  -8  14 1784.64 180.691   6
   1  -8 -13 1338.26 234.366  24
  -1  -8  13 1504.38 197.669   6
  -1  -8  13 1503.91 226.268  23
   1  -8 -12 1762.15 278.617  13
  -1  -8  12 2255.15 266.546   6
   1  -8 -12 1821.50 291.938  24
  -1  -8  12 1920.61 270.520  23
   1  -8 -12 1536.37 234.237   8
   1  -8 -11 5647.54 445.049   8
   1  -8 -11 5004.34 459.288  24
   1  -8 -11 4799.94 438.760  13
  -1  -8  11 6368.35 440.692   6
  -1  -8  11 5716.92 450.962  23
  -1  -8  10-57.4188 135.105   6
   1  -8 -10 105.028 93.0961   8
   1  -8 -10 13.0196 128.417  24
  -1  -8  10 27.6911 108.921  23
  -1  -8   9 6440.42 426.916   6
  -1  -8   9 5821.03 715.141  32
   1  -8  -9 3580.95 351.330  28
   1  -8  -9 4927.58 423.991  24
   1  -8  -9 5859.13 691.300  18
   1  -8  -9 6267.16 455.000   8
  -1  -8   9 6102.70 455.557  23
   1  -8  -9 3219.29 639.090   1
  -1  -8   9 5092.79 347.305  27
  -1  -8   8 2730.85 252.948  27
  -1  -8   8 2780.60 478.727  32
   1  -8  -8 2475.40 565.129   1
   1  -8  -8 2818.39 484.769  18
   1  -8  -8 2158.65 268.957  24
   1  -8  -8 2937.51 323.348  28
  -1  -8   8 2249.04 401.204  19
  -1  -8   8 2930.17 306.150  23
  -1  -8   8 3219.31 297.035   6
  -1  -8   7 9869.66 407.032   5
  -1  -8   7 10898.4 492.439  27
  -1  -8   7 8880.31 492.781  23
   1  -8  -7 8353.74 475.535  24
   1  -8  -7 9335.82 974.692   1
  -1  -8   7 11715.2 521.708   6
   1  -8  -7 11893.2 880.369  18
  -1  -8   7 12096.9 938.405  19
  -1  -8   7 12328.1 957.472  32
   1  -8  -7 10853.0 593.091  28
   1  -8  -6 1260.92 379.061   1
  -1  -8   6 1616.59 169.929   5
  -1  -8   6 983.065 162.728  23
  -1  -8   6 1791.65 202.619   6
   1  -8  -6 1405.63 311.356  18
  -1  -8   6 1643.74 196.040  27
   1  -8  -6 1509.74 184.627  24
   1  -8  -6 1599.30 227.811  28
  -1  -8   6 1990.24 361.219  32
   1  -8  -5 11914.3 570.901  28
  -1  -8   5 13778.8 529.767  23
   1  -8  -5 11989.5 481.508  24
  -1  -8   5 11884.9 440.810   5
  -1  -8   5 12624.2 503.829  27
  -1  -8   5 12161.7 486.271   6
   1  -8  -5 10564.0 943.912   1
  -1  -8   5 14076.5 905.092  32
   1  -8  -5 11764.4 803.742  18
   1  -8  -4 22904.9 1059.70  18
   1  -8  -4 21279.9 1220.40   1
  -1  -8   4 18170.6 536.952   5
  -1  -8   4 24609.6 683.097  27
  -1  -8   4 26302.3 1167.27  32
   1  -8  -4 22898.1 760.898  28
  -1  -8   4 17568.2 549.729   6
  -1  -8   3 16239.9 863.520  32
   1  -8  -3 15620.2 852.499  18
  -1  -8   2 15175.9 811.782  32
  -1  -8   2 13548.2 704.053  18
   1  -8  -2 14456.7 801.432  18
  -1  -8   1 22059.3 867.044  18
   1  -8  -1 21872.9 993.842  18
   1  -8   0 17234.0 914.675  18
  -1  -8   0 17851.2 780.584  18
  -1  -8  -1 15115.1 739.129  18
   1  -8   1 15818.7 917.819  18
  -1  -8  -2 4674.49 529.024   1
  -1  -8  -2 4850.84 439.632  18
   1  -8   2 6029.30 649.169  19
  -1  -8  -3 40442.3 1316.37  18
   1  -8   3 43146.4 935.779  27
   1  -8   3 45223.0 930.437  29
  -1  -8  -3 40855.3 952.194  28
  -1  -8  -3 42867.9 1684.04   1
   1  -8   4 1057.72 147.362   6
   1  -8   4 1008.01 161.382  27
  -1  -8  -4 1122.66 166.956  24
   1  -8   4 1298.21 174.119  29
  -1  -8  -4 1572.75 298.915  18
   1  -8   4 1441.68 335.347  19
  -1  -8  -4 883.951 292.053   1
  -1  -8  -4 787.723 148.829  28
   1  -8   5 20007.7 1018.09  32
   1  -8   5 21393.1 1317.66  19
  -1  -8  -5 18302.3 1265.53   1
  -1  -8  -5 16925.3 658.243  28
   1  -8   5 17930.9 598.790   6
  -1  -8  -5 18856.6 1009.07  18
  -1  -8  -5 17877.0 689.513  24
   1  -8   5 18155.9 652.989  27
  -1  -8  -6 1800.11 434.814   1
  -1  -8  -6 1705.20 243.014  24
   1  -8   6 2064.00 441.006  19
  -1  -8  -6 2087.93 369.141  18
   1  -8   6 1678.01 206.464   6
   1  -8   6 1484.37 307.355  32
  -1  -8  -6 1301.41 200.008  28
  -1  -8  -6 1347.29 190.650  12
   1  -8   6 1527.44 202.522  27
   1  -8   7 11672.0 1016.34  19
  -1  -8  -7 8916.45 978.186   1
   1  -8   7 10518.4 846.389  32
   1  -8   7 9871.92 510.818  27
  -1  -8  -7 10614.1 855.690  18
   1  -8   7 10671.5 520.857   6
  -1  -8  -7 8991.20 519.059  12
  -1  -8  -7 10248.9 594.514  24
   1  -8   8 5616.18 398.177  23
   1  -8   8 7203.48 450.557   6
  -1  -8  -8 5695.70 837.347   1
   1  -8   8 6698.98 424.017  27
  -1  -8  -8 7084.46 534.626  24
   1  -8   8 7517.18 816.637  19
   1  -8   9 6514.56 421.205  27
   1  -8   9 7801.93 483.234   6
   1  -8   9 6218.91 438.831  23
  -1  -8  -9 8441.02 612.398  24
   1  -8  10 1282.75 184.099  27
   1  -8  10 2198.59 274.370  23
   1  -8  10 2423.12 286.199   6
  -1  -8 -10 2080.86 351.173  24
   1  -8  11 684.847 173.875   6
  -1  -8 -11 352.186 186.436  24
   1  -8  11 354.218 121.679  23
   1  -8  12 1104.74 183.269  23
  -1  -8 -12 952.466 226.606  13
  -1  -8 -12 1065.57 245.223  24
   1  -8  12 1280.36 205.655   6
  -1  -8 -13-98.1424 114.422  13
  -1  -8 -13 18.0803 124.287  24
   1  -8  13 0.50491 80.1547   6
   1  -8  13 77.0871 61.4522  23
  -1  -8 -14-15.1854 72.3473  24
  -1  -7  15 1504.93 179.728  23
   1  -7 -14-73.9892 68.8829   8
  -1  -7  14-24.2798 89.7573  23
   1  -7 -14 48.1076 69.9407  13
  -1  -7  14 55.9247 54.2884   6
   1  -7 -14 56.4200 117.909  24
   1  -7 -13 4652.27 425.867  24
   1  -7 -13 3955.81 403.831  13
  -1  -7  13 4912.81 348.311   6
  -1  -7  13 4417.84 386.976  23
   1  -7 -13 4381.37 398.233   8
  -1  -7  12 6035.28 465.664  23
   1  -7 -12 5479.68 464.435   8
   1  -7 -12 6566.59 524.419  24
  -1  -7  12 6831.09 438.467   6
   1  -7 -11 225.317 168.182  24
  -1  -7  11 125.757 109.177   6
  -1  -7  11 302.817 136.081  23
   1  -7 -11 165.320 119.134  13
   1  -7 -11 432.947 149.814   8
   1  -7 -10 1789.42 261.138   8
  -1  -7  10 2513.95 474.796  32
   1  -7 -10 2620.34 338.680  24
  -1  -7  10 2486.58 274.246   6
  -1  -7  10 2488.93 304.336  23
  -1  -7   9 1620.87 345.031  32
  -1  -7   9 2089.91 262.674  23
   1  -7  -9 1084.45 198.502   8
   1  -7  -9 1945.17 272.405  24
   1  -7  -9 1292.61 207.182  28
   1  -7  -9 1906.11 424.052  18
  -1  -7   9 1788.60 229.933   6
   1  -7  -9 1522.05 499.326   1
  -1  -7   8 4988.65 620.133  32
   1  -7  -8 4728.25 569.737  18
   1  -7  -8 3364.18 317.395  24
   1  -7  -8 3408.57 322.718   8
  -1  -7   8 4763.47 568.929  19
  -1  -7   8 5135.68 377.842  23
   1  -7  -8 4364.40 653.764   1
   1  -7  -8 3073.95 308.690  28
  -1  -7   8 5174.62 348.455   6
  -1  -7   8 3983.54 288.970  27
  -1  -7   7 306.210 186.440  32
  -1  -7   7 483.428 188.672  19
  -1  -7   7 193.193 80.7529   6
  -1  -7   7 373.536 103.330  27
   1  -7  -7 331.054 117.394   8
   1  -7  -7 127.458 186.016   1
   1  -7  -7 360.029 121.669  28
   1  -7  -7 262.295 107.719  24
   1  -7  -7 417.459 197.238  18
  -1  -7   7 258.956 88.3167  23
   1  -7  -6 274.034 170.637  18
  -1  -7   6 287.184 81.0460   6
   1  -7  -6 130.592 88.7984  28
  -1  -7   6 307.600 84.0864  27
  -1  -7   6 404.038 180.196  32
   1  -7  -6 177.454 76.5812  24
  -1  -7   6 315.613 156.699  19
  -1  -7   6 202.382 64.8297  23
   1  -7  -5 1529.58 196.878  28
  -1  -7   5 1646.99 325.882  19
  -1  -7   5 1559.36 171.108   6
   1  -7  -5 1092.64 302.095   1
  -1  -7   5 1716.68 312.823  32
   1  -7  -5 1303.90 284.521  18
   1  -7  -4 23999.9 1021.98  18
  -1  -7   4 26297.9 1103.87  32
   1  -7  -3 43772.7 1312.96  18
   1  -7  -3 39256.4 1422.54   1
  -1  -7   2 4971.58 433.313  32
  -1  -7   2 5718.09 425.909  18
  -1  -7   1 12256.9 648.312  32
  -1  -7   1 11250.6 577.385  18
   1  -7  -1 12168.5 689.188  18
  -1  -7   0 3052.81 297.524  18
   1  -7   0 2211.74 320.280  18
  -1  -7  -1 10187.1 554.956  18
  -1  -7  -1 9948.88 635.126   1
   1  -7   1 10678.4 753.237  19
  -1  -7  -2 5593.17 536.009   1
   1  -7   2 6753.15 621.584  19
  -1  -7  -2 5738.13 440.897  18
  -1  -7  -3 15726.1 953.794   1
   1  -7   3 15596.4 735.621  32
   1  -7   3 17437.2 1034.02  19
  -1  -7  -3 14905.0 757.327  18
   1  -7   4 18265.4 872.441  32
  -1  -7  -4 17613.7 1098.07   1
   1  -7   4 17355.8 571.561  27
  -1  -7  -4 17768.0 871.964  18
   1  -7   5 13395.2 525.642  27
   1  -7   5 16932.6 1095.58  19
  -1  -7  -5 14872.1 1068.93   1
  -1  -7  -5 10608.1 485.886  28
  -1  -7  -5 13888.5 839.500  18
  -1  -7  -5 13565.4 518.771  12
   1  -7   5 11500.7 751.234  32
  -1  -7  -5 13766.8 569.733  24
  -1  -7  -6 27324.1 860.825  24
  -1  -7  -6 26918.3 1529.32   1
  -1  -7  -6 19143.4 677.584  12
   1  -7   6 25457.0 749.721  27
  -1  -7  -6 27590.3 1268.14  18
   1  -7   6 31026.6 1530.10  19
   1  -7   6 30817.1 1320.92  32
  -1  -7  -6 16787.8 634.714  28
   1  -7   6 26305.3 723.658  23
  -1  -7  -7 17516.0 1079.54  18
  -1  -7  -7 16861.4 687.810  12
  -1  -7  -7 15885.3 1230.01   1
   1  -7   7 16544.9 617.653   6
   1  -7   7 17525.6 1192.29  19
  -1  -7  -7 16663.6 729.466  24
  -1  -7  -7 15681.2 622.074  28
   1  -7   7 18314.5 1092.59  32
   1  -7   7 16234.9 614.755  27
   1  -7   8 1472.83 212.224  23
   1  -7   8 1444.02 201.593  27
   1  -7   8 1859.00 235.199   6
  -1  -7  -8 1436.55 263.483  24
  -1  -7  -8 1078.93 371.670   1
   1  -7   8 1946.92 366.005  19
   1  -7   8 1592.03 337.107  32
   1  -7   9 446.984 145.815   6
   1  -7   9 252.847 200.500  19
   1  -7   9 388.059 193.647  32
   1  -7   9 733.607 172.730  23
  -1  -7  -9 510.453 197.908  24
   1  -7   9 408.676 116.353  27
  -1  -7  -9 765.625 351.596   1
   1  -7  10 2790.18 307.741  23
   1  -7  10 2892.83 311.369   6
  -1  -7 -10 3010.85 406.385  24
  -1  -7 -11 4763.52 489.003  24
   1  -7  11 4342.67 383.367  23
   1  -7  11 4720.79 378.016   6
  -1  -7 -12 2299.55 355.572  13
   1  -7  12 2479.74 262.805   6
   1  -7  12 2179.55 263.073  23
  -1  -7 -12 2763.96 375.641  24
  -1  -7 -13 1174.23 241.423  13
  -1  -7 -13 1354.68 262.860  24
   1  -7  13 1605.10 193.828   6
   1  -7  13 1212.13 187.163  23
  -1  -7 -14 434.731 138.915  24
   1  -7  14 21.2834 39.8328  23
  -1  -7 -14 464.369 138.191  13
   1  -6 -15 745.110 155.745   8
   1  -6 -15 463.944 145.828  24
   1  -6 -14 2900.81 341.125  13
  -1  -6  14 3376.17 326.518  23
   1  -6 -14 3303.45 341.062   8
   1  -6 -14 3483.72 353.674  24
  -1  -6  13 2000.64 275.999  23
  -1  -6  13 1751.31 214.765   6
   1  -6 -13 1777.58 282.497   8
   1  -6 -13 1863.54 314.289  13
   1  -6 -13 1764.91 296.023  24
  -1  -6  12 1419.01 206.918   6
   1  -6 -12 1080.51 224.636   8
   1  -6 -12 1334.64 284.407  13
   1  -6 -12 1112.65 255.031  24
  -1  -6  12 1400.27 245.868  23
   1  -6 -11 5322.32 476.749   8
  -1  -6  11 5219.53 427.246  23
  -1  -6  11 5582.63 392.962   6
   1  -6 -11 6086.25 511.642  24
   1  -6 -11 5302.51 510.102  13
  -1  -6  10 17621.8 746.196  23
   1  -6 -10 17062.0 801.166   8
  -1  -6  10 16562.4 1178.99  32
   1  -6 -10 17529.8 813.325  24
  -1  -6  10 17606.3 671.615   6
  -1  -6   9 28142.0 811.403   6
  -1  -6   9 26997.1 1448.86  32
  -1  -6   9 25217.2 1234.64  19
  -1  -6   9 26166.4 861.291  23
   1  -6  -9 26337.4 919.518  24
   1  -6  -9 24162.2 1516.03   1
   1  -6  -9 30123.3 1438.02  18
   1  -6  -9 27366.7 965.087   8
   1  -6  -8 276.757 198.373   1
  -1  -6   8 434.447 165.977  19
  -1  -6   8 734.876 243.088  32
   1  -6  -8 310.222 102.221  28
   1  -6  -8-49.5947 128.682  18
  -1  -6   8 281.469 92.6399  27
   1  -6  -8 352.888 121.324   8
   1  -6  -8 234.745 102.394  24
  -1  -6   8 952.163 165.307  23
  -1  -6   8 142.460 81.6998   6
   1  -6  -7 6844.66 396.556  24
  -1  -6   7 6994.63 341.921  27
  -1  -6   7 8403.81 689.419  19
   1  -6  -7 5847.36 381.451  28
   1  -6  -7 9254.36 719.474  18
  -1  -6   7 8442.11 397.960   6
   1  -6  -7 7360.45 781.119   1
  -1  -6   7 8032.49 422.324  23
   1  -6  -7 8744.41 466.172   8
  -1  -6   7 8688.68 737.231  32
  -1  -6   6 5090.93 532.374  32
   1  -6  -6 3949.63 561.308   1
  -1  -6   6 5066.61 287.482   6
   1  -6  -6 5176.54 510.350  18
  -1  -6   6 5003.01 518.103  19
   1  -6  -5 27377.5 1304.14   1
  -1  -6   5 31924.5 1238.75  32
   1  -6  -5 28936.2 1100.55  18
  -1  -6   5 31714.0 1239.72  19
   1  -6  -4 61918.9 1528.14  18
  -1  -6   4 68501.9 1678.17  32
   1  -6  -4 60740.0 1808.59   1
  -1  -6   4 69911.5 1782.83  19
   1  -6  -3 3407.08 400.515   1
  -1  -6   3 3804.16 374.848  32
   1  -6  -3 3454.10 358.453  18
   1  -6  -2 8675.96 536.086  18
  -1  -6   2 10021.2 566.177  32
   1  -6  -1 71059.4 1525.01  18
  -1  -6   1 67574.7 1275.61  18
  -1  -6   1 72618.9 1429.38  32
  -1  -6   0 5000.93 369.492   1
  -1  -6   0 5317.85 358.691  18
   1  -6   1 7843.85 583.049  19
  -1  -6  -1 7329.75 505.797   1
  -1  -6  -1 7237.04 430.323  18
   1  -6   2 24395.8 1082.08  19
  -1  -6  -2 22344.8 801.562  18
  -1  -6  -2 23238.0 995.189   1
   1  -6   2 22928.5 749.016  32
  -1  -6  -3 52788.2 1608.45   1
  -1  -6  -3 51756.3 1301.67  18
   1  -6   3 53400.7 1285.98  32
  -1  -6  -4 21689.0 1116.75   1
  -1  -6  -4 21863.5 922.569  18
   1  -6   4 22835.2 924.018  32
   1  -6   4 23914.2 1153.81  19
  -1  -6  -5 2326.12 342.329  18
   1  -6   5 2348.86 333.015  32
   1  -6   5 2543.17 400.112  19
  -1  -6  -5 2421.36 425.140   1
  -1  -6  -6 4897.43 516.038  18
   1  -6   6 4992.17 582.202  19
  -1  -6  -6 4208.10 328.567  24
   1  -6   6 4394.99 295.721  27
  -1  -6  -6 5484.44 664.070   1
  -1  -6  -6 3335.76 271.838  12
   1  -6   6 4849.13 514.628  32
  -1  -6  -7 7095.59 439.201  12
  -1  -6  -7 6759.69 455.916  24
   1  -6   7 7501.01 684.910  32
  -1  -6  -7 7501.55 680.678  18
  -1  -6  -7 7453.81 812.077   1
   1  -6   7 6609.56 376.174  27
   1  -6   7 7765.54 757.433  19
   1  -6   8 2318.03 426.223  19
  -1  -6  -8 1983.84 250.385   8
   1  -6   8 2218.58 235.728   6
   1  -6   8 2047.98 221.841  27
   1  -6   8 2163.76 384.372  32
  -1  -6  -8 1851.18 269.865  24
  -1  -6  -8 2647.33 504.855   1
  -1  -6  -9 88.1542 82.3558   8
   1  -6   9 73.5511 61.3925  27
  -1  -6  -9 123.105 152.247  24
   1  -6   9 184.221 106.371   6
   1  -6   9-132.962 105.479  19
   1  -6   9 114.626 96.2705  32
   1  -6  10 5249.89 390.908   6
  -1  -6 -10 5271.17 501.322  24
   1  -6  11 574.140 165.228  23
  -1  -6 -11 406.914 157.436   8
  -1  -6 -11 530.645 242.075  24
   1  -6  11 568.276 157.718   6
   1  -6  12 2526.39 302.981  23
  -1  -6 -12 2661.54 390.487  13
  -1  -6 -12 2891.11 389.631  24
  -1  -6 -12 1749.55 269.964   8
   1  -6  12 2626.81 269.224   6
   1  -6  13 49.6520 93.1776  23
  -1  -6 -13 287.026 177.518  24
  -1  -6 -13 352.006 116.241   8
   1  -6  13 231.740 92.4160   6
  -1  -6 -13 288.284 166.435  13
  -1  -6 -14 491.206 165.795  24
   1  -6  14 326.400 103.959  23
  -1  -6 -14 486.018 155.892  13
  -1  -5  16 245.312 83.9161  23
   1  -5 -15 495.374 148.363  24
  -1  -5  15 297.106 121.067  23
   1  -5 -15 137.394 95.5749   8
   1  -5 -15 230.350 107.631  13
   1  -5 -14 352.905 165.004  13
  -1  -5  14 346.947 135.371  23
   1  -5 -14 497.848 159.452   8
   1  -5 -14 152.851 126.468  24
   1  -5 -13 1948.50 317.378  24
   1  -5 -13 2145.02 316.776   8
  -1  -5  13 2418.09 301.957  23
   1  -5 -13 2554.48 367.541  13
  -1  -5  13 2059.70 217.411   6
  -1  -5  12 744.779 151.631   6
   1  -5 -12 750.992 235.170  13
  -1  -5  12 708.222 173.953  23
   1  -5 -12 851.244 231.819  24
   1  -5 -12 708.974 205.358   8
  -1  -5  11 3646.06 356.921  23
   1  -5 -11 3571.10 399.909   8
   1  -5 -11 3526.03 395.351  24
  -1  -5  11 3626.65 304.918   6
   1  -5 -11 3760.97 435.903  13
  -1  -5  11 3914.34 573.221  32
   1  -5 -11 2004.78 461.222   1
   1  -5 -10 2832.47 350.580   8
  -1  -5  10 2635.19 459.046  32
   1  -5 -10 3502.96 373.675  24
   1  -5 -10 2269.20 510.853   1
  -1  -5  10 2747.31 260.515   6
  -1  -5   9 9435.63 724.724  19
  -1  -5   9 10765.4 877.540  32
   1  -5  -9 11324.8 858.495  18
  -1  -5   9 11193.9 488.562   6
   1  -5  -9 11197.8 612.508   8
   1  -5  -9 10892.9 583.973  24
   1  -5  -9 10312.0 957.501   1
   1  -5  -8 11474.0 834.237  18
   1  -5  -8 11094.4 956.650   1
  -1  -5   8 11754.9 475.858   6
   1  -5  -8 11690.9 523.722  28
  -1  -5   8 11124.2 684.500  30
  -1  -5   8 11404.2 851.853  32
  -1  -5   8 10901.4 744.776  19
   1  -5  -8 9293.81 533.230   8
  -1  -5   7 3463.94 439.344  32
  -1  -5   7 3039.50 228.278   6
   1  -5  -7 2446.07 457.995   1
  -1  -5   7 2958.56 318.986  30
   1  -5  -7 3731.74 439.473  18
  -1  -5   7 2845.25 372.092  19
  -1  -5   6 6393.38 424.859  30
   1  -5  -6 7262.49 565.424  18
  -1  -5   6 6884.47 553.470  19
  -1  -5   6 7116.27 587.690  32
   1  -5  -6 6056.69 648.517   1
  -1  -5   5 39707.2 1291.35  32
   1  -5  -5 38935.5 1209.83  18
  -1  -5   5 39073.8 1252.81  19
   1  -5  -5 37251.2 1427.58   1
  -1  -5   4 41684.1 1225.53  32
   1  -5  -4 38455.5 1115.63  18
  -1  -5   4 41807.5 1240.04  19
  -1  -5   3 7464.31 511.609  19
  -1  -5   3 6799.15 462.432  32
   1  -5  -3 6277.01 428.876  18
   1  -5  -2 8097.02 473.928  18
  -1  -5   2 8969.62 487.222  32
  -1  -5   1 21244.2 548.899   1
  -1  -5   1 22476.1 729.540  32
  -1  -5   1 21829.9 646.628  18
   1  -5  -1 21778.6 777.783  18
  -1  -5   1 22652.5 488.784   2
  -1  -5   0 25395.8 732.897   1
   1  -5   0 16629.3 416.106  32
   1  -5   0 27138.7 923.301  19
  -1  -5   0 23821.9 676.958  18
  -1  -5  -1 129200. 1889.03   1
   1  -5   1 133340. 2137.77  19
  -1  -5  -1 120684. 1586.84  18
   1  -5   1 124551. 1392.98  32
  -1  -5  -2 653.612 145.269  18
  -1  -5  -2 554.459 160.180   1
   1  -5   2 750.282 187.491  19
  -1  -5  -3 4846.10 377.886  18
  -1  -5  -3 4007.58 412.441   1
   1  -5   3 4529.17 352.273  32
   1  -5   3 4543.02 450.291  19
  -1  -5  -4 21676.1 872.195  18
   1  -5   4 23319.4 1047.24  19
  -1  -5  -4 20827.6 993.788   1
   1  -5   4 21866.2 852.532  32
  -1  -5  -5 72835.1 2028.91   1
  -1  -5  -5 76726.7 1785.85  18
   1  -5   5 74680.3 1736.21  32
  -1  -5  -6 3679.40 456.969  18
  -1  -5  -6 3270.91 480.009   1
   1  -5   6 3680.87 430.599  32
   1  -5   6 3531.52 462.497  19
  -1  -5  -6 3455.81 282.144  24
  -1  -5  -7 26481.3 813.745   8
  -1  -5  -7 29218.1 1285.42  18
   1  -5   7 22563.0 646.189  27
   1  -5   7 28538.3 1352.10  19
  -1  -5  -7 26302.9 845.187  24
  -1  -5  -7 26868.0 823.096  12
   1  -5   7 28115.8 1266.40  32
  -1  -5  -7 28536.7 1470.80   1
  -1  -5  -7 24024.5 768.140  26
   1  -5   8 1934.12 201.447  27
  -1  -5  -8 2222.78 288.472  24
   1  -5   8 2160.92 408.799  19
  -1  -5  -8 1023.86 184.394  26
  -1  -5  -8 2307.77 493.771   1
   1  -5   8 1944.09 368.324  32
  -1  -5  -8 1434.16 208.967   8
  -1  -5  -9 1250.93 220.888   8
   1  -5   9 1160.93 305.807  32
  -1  -5  -9 1814.56 289.111  24
   1  -5   9 1683.58 356.346  19
   1  -5   9 1759.26 215.279   6
  -1  -5  -9 994.090 365.838   1
   1  -5  10 281.114 176.461  19
  -1  -5 -10 304.720 204.822  24
   1  -5  10 891.247 267.096  32
  -1  -5 -10 585.525 303.699   1
   1  -5  10 227.973 104.413   6
  -1  -5 -10 510.888 165.577   8
   1  -5  11 2174.38 255.231   6
  -1  -5 -11 2076.90 318.908   8
   1  -5  11 1849.90 266.604  21
  -1  -5 -11 2081.42 345.500  24
   1  -5  12 2260.67 247.112   6
  -1  -5 -12 1903.49 343.809  13
  -1  -5 -12 2392.77 326.736   8
   1  -5  12 1661.68 244.052  21
  -1  -5 -12 2250.48 364.004  24
  -1  -5 -13 33.3299 137.947  13
  -1  -5 -13 228.206 127.481   8
   1  -5  13-52.4862 113.944  23
  -1  -5 -13 79.0431 172.200  24
   1  -5  13 139.074 90.1935   6
  -1  -5 -14 381.986 167.087  24
  -1  -5 -14 416.932 120.282   8
   1  -5  14 495.104 140.116  23
  -1  -5 -14 337.249 138.651  13
  -1  -5 -15 415.236 128.305  24
   1  -5  15 218.697 78.9977  23
   1  -4 -16 365.646 106.377   8
  -1  -4  16 424.288 114.972  23
   1  -4 -16 285.689 100.553  24
   1  -4 -15 360.703 145.264  24
   1  -4 -15 388.081 150.646  13
   1  -4 -15 288.309 131.986   8
  -1  -4  15 291.887 112.194  23
   1  -4 -14 453.083 189.528  13
   1  -4 -14 688.169 196.859  24
   1  -4 -14 766.795 194.415   8
  -1  -4  14 890.150 201.327  23
   1  -4 -13 649.005 208.874  13
   1  -4 -13 231.297 133.789   8
  -1  -4  13 332.644 165.094  23
   1  -4 -13 426.291 189.528  24
   1  -4 -12 9160.47 633.047  24
   1  -4 -12 9013.87 696.100  13
   1  -4 -12 8912.26 627.565   8
  -1  -4  12 7797.90 414.163   6
   1  -4 -11 2549.31 337.522   8
   1  -4 -11 2636.39 357.145  24
  -1  -4  11 3263.35 508.427  32
  -1  -4  11 2654.72 248.411   6
   1  -4 -11 2623.26 506.219   1
   1  -4 -11 2528.82 374.079  13
  -1  -4  10 7324.96 662.151  30
  -1  -4  10 11460.5 490.749   6
  -1  -4  10 10759.0 900.567  32
   1  -4 -10 11777.2 666.834   8
   1  -4 -10 11500.4 643.177  24
   1  -4 -10 7639.78 438.805   9
   1  -4 -10 9839.29 932.886   1
  -1  -4   9 1478.09 337.565  32
   1  -4  -9 1347.45 216.644  24
   1  -4  -9 1141.99 350.939   1
  -1  -4   9 1552.12 298.766  30
  -1  -4   9 1183.68 240.883  19
  -1  -4   9 1270.31 164.640   6
   1  -4  -9 1416.33 177.636   9
   1  -4  -9 1465.18 230.407   8
   1  -4  -8 6991.42 442.920   8
  -1  -4   8 5741.48 510.917  19
  -1  -4   8 6485.98 619.770  32
  -1  -4   8 5968.31 318.615   6
   1  -4  -8 4494.41 335.426  24
   1  -4  -8 5646.35 678.088   1
   1  -4  -8 6522.60 624.222  18
   1  -4  -7 31819.4 1410.96   1
   1  -4  -7 33506.5 1231.82  18
  -1  -4   7 30288.5 1229.77  32
  -1  -4   6 47186.3 1426.85  32
   1  -4  -6 47043.7 1611.61   1
   1  -4  -6 48931.6 1375.46  18
  -1  -4   6 42965.4 1255.63  19
  -1  -4   5 594.357 153.033  19
   1  -4  -5 420.718 184.530   1
  -1  -4   5 528.206 155.607  32
   1  -4  -4 21527.5 930.408   1
  -1  -4   4 24221.9 869.094  32
   1  -4  -4 24044.4 823.399  18
  -1  -4   4 21962.8 622.566  30
  -1  -4   4 24736.4 855.561  19
   1  -4  -3 92462.0 1764.46   1
  -1  -4   3 92769.6 1062.28  30
  -1  -4   3 103117. 1644.34  32
  -1  -4   3 107273. 1687.63  19
   1  -4  -3 99118.8 1545.50  18
   1  -4  -2 16265.7 673.039   1
  -1  -4   2 18445.6 678.622  19
  -1  -4   2 17454.4 631.420  32
  -1  -4   1 4281.65 210.990   1
  -1  -4   1 4056.29 286.712  32
   1  -4   0 284562. 1519.15  32
  -1  -4   0 292234. 2051.26  18
   1  -4   0 314391. 2748.08  19
  -1  -4   0 297499. 2366.82  32
  -1  -4   0 309355. 2207.46   1
   1  -4   1 274619. 2692.17  19
  -1  -4  -1 259055. 2077.76  18
  -1  -4  -1 269403. 2398.57   1
   1  -4   1 259394. 1809.20  32
  -1  -4  -2 27201.8 742.488  18
  -1  -4  -2 26848.1 858.029   1
   1  -4   2 26797.5 702.801  32
   1  -4   2 29144.0 939.846  19
  -1  -4  -3 41460.6 1015.58  18
  -1  -4  -3 39435.1 1134.72   1
   1  -4   3 39096.0 969.114  32
   1  -4   3 40951.8 1187.15  19
   1  -4   4 13740.2 648.617  32
   1  -4   4 14622.7 760.914  19
  -1  -4  -4 14765.3 773.920   1
  -1  -4  -4 15128.5 686.719  18
  -1  -4  -5 659.309 204.151   1
   1  -4   5 901.390 196.264  32
  -1  -4  -5 849.006 206.461  18
   1  -4   5 1083.45 239.408  19
   1  -4   6 78101.9 1983.15  19
  -1  -4  -6 74874.0 1070.21  33
  -1  -4  -6 80107.2 2105.33   1
  -1  -4  -6 79557.6 1910.33  18
   1  -4   6 73778.0 1813.37  32
   1  -4   7 11461.2 810.862  19
  -1  -4  -7 10986.7 512.911  12
  -1  -4  -7 11313.7 447.882  33
  -1  -4  -7 9162.43 487.026  24
  -1  -4  -7 10526.0 518.737   8
   1  -4   7 10976.0 770.711  32
  -1  -4  -7 10166.2 491.342  26
  -1  -4  -7 11993.4 910.519   1
  -1  -4  -8 3560.72 338.855   8
  -1  -4  -8 5009.57 634.477   1
  -1  -4  -8 4074.24 290.841  17
  -1  -4  -8 4709.24 397.372  24
   1  -4   8 5336.94 574.168  19
  -1  -4  -8 4151.38 359.707  26
   1  -4   8 4225.14 520.401  32
   1  -4   8 3909.84 264.282  27
  -1  -4  -9 1548.82 401.534   1
   1  -4   9 1441.27 325.325  19
  -1  -4  -9 1073.30 168.006  17
   1  -4   9 1608.07 348.969  32
   1  -4   9 1361.25 184.279   6
  -1  -4  -9 1505.56 255.006   8
  -1  -4  -9 1637.52 260.961  26
  -1  -4  -9 1335.19 242.036  24
  -1  -4 -10 9893.68 629.845  26
   1  -4  10 10405.4 876.849  19
  -1  -4 -10 11393.8 702.424  24
  -1  -4 -10 11313.5 682.233   8
   1  -4  10 10754.2 925.084  32
   1  -4  10 10683.4 512.701   6
  -1  -4 -10 9838.53 1001.43   1
   1  -4  11 8507.66 458.387   6
  -1  -4 -11 9302.83 637.406   8
  -1  -4 -11 9474.07 675.361  24
  -1  -4 -12 3978.99 492.437  13
   1  -4  12 3480.13 372.886  21
   1  -4  12 3292.80 280.381   6
  -1  -4 -12 3557.34 407.621   8
  -1  -4 -12 3910.81 465.856  24
  -1  -4 -13 5011.27 486.031  24
  -1  -4 -13 5256.16 533.729  13
  -1  -4 -13 4433.37 436.773   8
   1  -4  14 26.1096 48.0914  21
   1  -4  14 255.176 113.718  23
  -1  -4 -14 16.2478 79.5832   8
  -1  -4 -14 369.256 165.370  24
  -1  -4 -14 132.567 134.406  13
  -1  -4 -15 353.347 131.913  24
   1  -4  15 356.776 106.469  23
  -1  -4 -15 147.967 100.795  13
  -1  -4 -15 88.8970 64.8528   8
   1  -3 -16 24.8707 65.5964   8
  -1  -3  16 91.2099 85.1055  23
  -1  -3  15 1291.68 209.498  23
   1  -3 -15 1181.83 247.525  13
   1  -3 -15 966.311 207.363   8
   1  -3 -15 827.012 194.132  24
   1  -3 -14 59.0197 126.995  24
   1  -3 -14 46.8393 124.344   8
  -1  -3  14-66.1124 122.927  23
   1  -3 -14-74.0622 147.036  13
   1  -3 -13 208.314 166.595  13
   1  -3 -13 319.735 170.297   8
   1  -3 -13 187.271 176.271  24
   1  -3 -12 3799.60 430.139  24
   1  -3 -12 4235.64 490.535  13
   1  -3 -12 3382.76 398.899   8
  -1  -3  11 2249.26 212.042   6
   1  -3 -11 2656.68 379.732  13
  -1  -3  11 1927.79 417.010  32
   1  -3 -11 1434.67 209.372   9
   1  -3 -11 2454.63 341.936  24
  -1  -3  11 2196.69 395.462  30
   1  -3 -11 1832.03 379.637   1
   1  -3 -11 2189.50 318.582   8
   1  -3 -10 3711.69 411.125  13
  -1  -3  10 3135.49 479.399  32
   1  -3 -10 2470.95 251.384   9
  -1  -3  10 2855.77 233.427   6
   1  -3 -10 2913.21 342.157   8
   1  -3 -10 3139.10 341.877  24
   1  -3 -10 2761.75 508.518   1
  -1  -3  10 3633.60 477.670  30
  -1  -3   9 660.433 117.503   6
   1  -3  -9 132.471 121.654  24
  -1  -3   9 328.135 167.905  32
   1  -3  -9 321.327 202.091   1
   1  -3  -9 107.088 51.0284   9
  -1  -3   9 557.072 159.539  19
   1  -3  -9 225.595 129.260   8
   1  -3  -8 2365.83 413.065   1
   1  -3  -8 1811.65 224.035   8
   1  -3  -8 2454.98 378.299  18
  -1  -3   8 2361.50 363.977  32
   1  -3  -8 2417.59 223.330  22
   1  -3  -8 2060.18 235.072  26
  -1  -3   8 2157.07 295.452  19
   1  -3  -8 1782.20 218.135  24
   1  -3  -7 46212.0 851.844  22
  -1  -3   7 48860.5 1493.91  32
  -1  -3   7 44547.0 1241.10  19
   1  -3  -7 49438.3 1666.27   1
   1  -3  -7 51408.5 1468.31  18
   1  -3  -6 6466.85 485.073  18
  -1  -3   6 5237.29 399.056  19
   1  -3  -6 4706.49 480.498   1
  -1  -3   6 6054.61 490.348  32
   1  -3  -5 8648.07 501.073  18
   1  -3  -5 6882.66 539.573   1
  -1  -3   5 7563.92 503.795  32
  -1  -3   5 7811.68 457.375  19
  -1  -3   4 30423.8 905.744  32
   1  -3  -4 30982.9 866.344  18
  -1  -3   4 28793.1 811.061  19
   1  -3  -3 32084.9 961.088   1
  -1  -3   3 36505.8 902.503  32
  -1  -3   3 33658.9 662.850  30
  -1  -3   3 35235.4 852.483  19
   1  -3  -2 38120.5 963.952   1
  -1  -3   2 45722.6 919.669  19
  -1  -3   2 40430.8 586.204  30
  -1  -3   2 44245.2 900.079  32
  -1  -3   1 203896. 1825.71  32
  -1  -3   1 205555. 1131.59  30
  -1  -3   1 207990. 1156.34   1
   1  -3   0 146761. 886.738  32
  -1  -3   0 144676. 1474.48  32
  -1  -3   0 151735. 890.137   2
  -1  -3   0 148189. 1224.08  18
   1  -3   0 142835. 1581.22  19
  -1  -3   0 147688. 1296.80   1
   1  -3   1 103303. 1033.14  32
   1  -3   1 105220. 1453.42  19
  -1  -3  -1 103977. 1162.27  18
  -1  -3  -2 99922.9 1453.84   1
   1  -3   2 105856. 1582.20  19
   1  -3   2 100229. 1268.57  32
  -1  -3  -2 107282. 1366.71  18
   1  -3   3 45319.1 1138.45  19
   1  -3   3 42774.7 957.958  32
  -1  -3  -3 44256.5 1000.95  18
  -1  -3  -4 22868.5 812.102  18
   1  -3   4 20790.7 760.340  32
  -1  -3  -4 21197.4 842.654   1
   1  -3   4 22127.6 867.151  19
   1  -3   5 57969.4 1511.57  19
  -1  -3  -5 58747.8 1463.85  18
  -1  -3  -5 58913.5 1532.11   1
   1  -3   5 56280.1 1393.78  32
  -1  -3  -6 20087.9 1000.73   1
   1  -3   6 21492.9 992.599  19
  -1  -3  -6 18939.0 514.840  33
   1  -3   6 19755.8 912.092  32
   1  -3   7 8716.89 681.232  19
  -1  -3  -7 8523.91 464.267  24
  -1  -3  -7 8361.42 369.758  33
  -1  -3  -7 7030.29 411.084  26
  -1  -3  -7 8468.30 728.014   1
   1  -3   7 8135.35 645.662  32
  -1  -3  -8 14442.7 528.786  33
  -1  -3  -8 14903.4 674.938  24
   1  -3   8 15208.0 948.526  19
  -1  -3  -8 15274.7 681.142   8
  -1  -3  -8 14346.9 636.888  26
   1  -3   8 14229.3 920.230  32
  -1  -3  -8 14915.8 1025.56   1
  -1  -3  -9 24827.1 734.985  33
   1  -3   9 23497.1 1274.21  32
  -1  -3  -9 26419.8 966.414   8
  -1  -3  -9 24905.0 904.763  26
  -1  -3  -9 24936.6 1423.63   1
  -1  -3  -9 25084.2 951.641  24
   1  -3   9 23636.6 1235.02  19
  -1  -3 -10 5826.02 491.409  26
  -1  -3 -10 5592.25 727.195   1
  -1  -3 -10 6082.22 510.006   8
  -1  -3 -10 4312.37 353.834  17
   1  -3  10 6210.78 698.891  32
  -1  -3 -10 4580.03 323.897  33
  -1  -3 -10 6267.97 532.326  24
   1  -3  10 6201.41 660.784  19
   1  -3  10 6007.84 367.554   6
  -1  -3 -11 1142.55 275.398  24
  -1  -3 -11 600.922 202.804   8
   1  -3  11 1200.36 171.109   6
  -1  -3 -11 552.769 205.381  26
  -1  -3 -12 1111.49 309.933  13
  -1  -3 -12 895.864 273.383  24
  -1  -3 -12 1350.01 273.491   8
   1  -3  13 1316.45 227.389  21
  -1  -3 -13 1344.28 292.181  13
  -1  -3 -13 1743.86 324.575  24
  -1  -3 -13 1353.77 270.942   8
   1  -3  14 408.355 121.677  21
   1  -3  14 529.383 148.393  23
  -1  -3 -14 643.838 202.684  24
  -1  -3 -14 707.188 218.360  13
  -1  -3 -14 464.442 157.594   8
  -1  -3 -15-131.612 113.947  13
   1  -3  15 200.335 96.0333  23
  -1  -3 -15-112.522 79.8042   8
  -1  -3 -15 227.651 123.359  24
   1  -2 -16 124.717 89.1879   8
  -1  -2  16 297.329 104.641  23
  -1  -2  15 193.131 117.838  23
   1  -2 -15 110.711 105.154   8
   1  -2 -15 70.6709 118.654  24
   1  -2 -14-67.2569 157.459  13
  -1  -2  14 57.0467 116.944  23
   1  -2 -14 5.02480 117.258   8
   1  -2 -14-155.060 182.732  24
   1  -2 -13 288.118 168.897   8
   1  -2 -13 399.999 206.195  13
   1  -2 -13 180.874 175.519  24
   1  -2 -12 74.2399 142.102   8
   1  -2 -12-1.90499 177.590  13
   1  -2 -12 11.9681 71.2760   9
   1  -2 -12 210.701 177.953  24
  -1  -2  12 518.767 209.966  30
   1  -2 -11 1434.64 285.004  13
  -1  -2  11 1220.79 300.818  30
   1  -2 -11 837.818 220.097   8
   1  -2 -11 1177.41 251.109  24
   1  -2 -11 744.795 154.451   9
  -1  -2  11 920.164 273.319  32
   1  -2 -10 252.832 126.015  24
   1  -2 -10 48.3100 113.365  13
   1  -2 -10 141.948 63.4922   9
   1  -2 -10 238.858 129.315   8
  -1  -2  10 130.630 143.763  32
   1  -2 -10-231.465 208.362   1
   1  -2  -9 7399.54 418.046  22
   1  -2  -9 6407.48 686.643   1
  -1  -2   9 7556.91 675.687  32
   1  -2  -9 6909.36 445.074  26
   1  -2  -9 7708.89 492.860  24
  -1  -2   9 6682.00 513.906  19
   1  -2  -9 7115.77 461.765   8
  -1  -2   9 6582.42 306.047   6
   1  -2  -9 5703.14 358.343   9
  -1  -2   8 2499.70 362.456  32
   1  -2  -8 1719.48 216.111   8
   1  -2  -8 1798.26 209.730  26
   1  -2  -8 2010.97 391.175   1
  -1  -2   8 1931.25 259.122  19
   1  -2  -8 2585.13 227.433  22
  -1  -2   7 19029.4 772.375  19
   1  -2  -7 22780.8 941.934  18
   1  -2  -7 19539.4 994.446   1
   1  -2  -7 21210.6 575.304  22
  -1  -2   7 22813.4 982.901  32
  -1  -2   6 17036.0 660.898  19
   1  -2  -6 18022.3 875.396   1
  -1  -2   6 18896.8 822.624  32
   1  -2  -5 17660.4 783.796   1
  -1  -2   5 19616.9 757.964  32
  -1  -2   5 17817.5 619.676  19
   1  -2  -5 19857.2 722.901  18
  -1  -2   4 25471.5 675.745  19
   1  -2  -4 27870.7 751.395  18
  -1  -2   4 27890.7 816.720  32
   1  -2  -4 27114.4 880.980   1
  -1  -2   3 158595. 1508.32  19
  -1  -2   3 162661. 1743.35  32
   1  -2  -2 369622. 2640.97   1
  -1  -2   2 397319. 2215.26  19
  -1  -2   2 379012. 1874.25  30
  -1  -2   2 387181. 2392.24  32
  -1  -2   1 108963. 672.287   1
   1  -2  -1 109421. 1056.64  19
  -1  -2   1 117305. 955.436   2
  -1  -2   1 117799. 1209.17  32
  -1  -2   1 117572. 895.843  30
  -1  -2   0 189772. 1496.93  32
   1  -2   0 184449. 1476.37  19
  -1  -2   0 179212. 1214.49   1
  -1  -2   0 189308. 1157.66  30
   1  -2   0 194075. 811.707  32
  -1  -2   0 196527. 1012.42   2
  -1  -2   0 196571. 1116.16  18
  -1  -2  -1 112894. 1095.08  18
   1  -2   1 116598. 1009.37  32
   1  -2   1 114688. 1322.97  19
  -1  -2  -2 1400.77 161.792   1
   1  -2   2 1535.51 151.862  32
   1  -2   3 10893.0 523.916  19
  -1  -2  -3 10728.6 483.765  18
  -1  -2  -3 9764.66 470.608   1
   1  -2   3 10619.6 457.212  32
   1  -2   4 57454.8 1329.58  19
   1  -2   4 54789.4 1190.17  32
  -1  -2  -4 56646.6 1235.93  18
  -1  -2  -5 82336.1 1688.10   1
   1  -2   5 81435.5 1640.11  32
   1  -2   5 84854.6 1773.92  19
   1  -2   6 29718.5 1135.56  19
  -1  -2  -6 26480.5 1068.13   1
   1  -2   6 26483.1 1037.73  32
  -1  -2  -7 1278.59 187.066  24
  -1  -2  -7 1063.47 133.159  33
  -1  -2  -7 1116.37 290.897   1
   1  -2   7 1129.67 252.537  19
   1  -2   7 1291.12 254.527  32
  -1  -2  -8 971.834 149.259  17
  -1  -2  -8 1452.60 208.907  26
  -1  -2  -8 1592.12 245.604  24
  -1  -2  -8 1235.00 211.151   8
  -1  -2  -8 1517.02 168.458  33
   1  -2   8 1311.51 278.946  19
   1  -2   8 1217.86 278.348  32
  -1  -2  -8 1221.13 310.420   1
  -1  -2  -9 721.267 313.994   1
  -1  -2  -9 386.231 94.5442  33
   1  -2   9 438.888 161.269  32
   1  -2   9 327.036 165.758  19
  -1  -2  -9 396.720 139.341  26
  -1  -2  -9 334.597 139.882  24
  -1  -2  -9 508.692 130.991  17
  -1  -2  -9 327.137 141.259   8
  -1  -2 -10 10958.5 1003.55   1
  -1  -2 -10 10341.5 485.886  33
   1  -2  10 11307.5 468.366   6
   1  -2  10 9377.07 787.741  19
   1  -2  10 13253.0 1010.64  32
  -1  -2 -10 14306.0 734.178  26
  -1  -2 -10 14033.1 639.105  17
  -1  -2 -10 15207.4 786.036   8
  -1  -2 -10 14974.4 792.629  24
  -1  -2 -11 8927.32 701.201  13
  -1  -2 -11 6960.16 830.443   1
   1  -2  11 7593.51 806.719  32
  -1  -2 -11 9263.27 663.796  24
  -1  -2 -11 8299.47 596.834  26
  -1  -2 -11 8117.34 618.871   8
  -1  -2 -12 793.782 283.418  13
  -1  -2 -12 496.241 214.887   8
  -1  -2 -12 810.022 256.048  24
  -1  -2 -13 4657.91 477.603  24
  -1  -2 -13 4054.43 485.579  13
  -1  -2 -13 4279.09 450.320   8
  -1  -2 -14 145.243 154.013  13
  -1  -2 -14 183.297 158.280  24
  -1  -2 -14 163.538 128.220   8
   1  -2  14 101.934 80.3471  21
  -1  -2 -15 279.122 114.337   8
   1  -2  15 384.847 115.290  23
  -1  -2 -15 725.324 184.454  13
  -1  -2 -15 441.931 154.886  24
  -1  -1  16 357.818 115.100  23
   1  -1 -16 243.773 111.823   8
   1  -1 -15 792.478 202.750  24
   1  -1 -15 969.494 203.763   8
  -1  -1  15 1222.67 208.707  23
   1  -1 -14 658.902 219.062  13
   1  -1 -14 720.336 215.644   8
   1  -1 -14 828.566 235.052  24
   1  -1 -13 10971.5 773.785  13
   1  -1 -13 10799.8 698.813  24
   1  -1 -13 8923.40 650.848   8
   1  -1 -12 6189.79 545.877  24
   1  -1 -12 6080.06 518.240   8
  -1  -1  12 5245.91 681.247  32
  -1  -1  12 5431.23 668.315  30
   1  -1 -12 6483.14 601.805  13
   1  -1 -12 4603.73 384.495   9
   1  -1 -11 1362.97 205.677   9
  -1  -1  11 1959.44 385.520  30
   1  -1 -11 1555.78 265.819   8
   1  -1 -11 2139.23 321.658  24
   1  -1 -11 1776.73 247.398  22
  -1  -1  11 2009.53 392.765  32
   1  -1 -11 1749.11 307.801  13
   1  -1 -10 9436.83 505.883  22
   1  -1 -10 9988.60 605.679  24
   1  -1 -10 8970.80 550.725   8
  -1  -1  10 9930.43 823.417  32
   1  -1 -10 7926.91 755.209   1
   1  -1 -10 9017.28 545.467  26
   1  -1 -10 10035.7 657.037  13
   1  -1  -9 898.961 182.402   8
  -1  -1   9 892.598 241.202  32
   1  -1  -9 1276.43 183.239  22
  -1  -1   9 1446.42 242.175  19
   1  -1  -9 1200.94 226.936  13
   1  -1  -9 1047.54 279.732   1
   1  -1  -9 1005.37 199.305  24
   1  -1  -9 966.838 180.424  26
   1  -1  -9 807.994 139.079   9
   1  -1  -8 15721.5 547.767  22
   1  -1  -8 13137.5 537.556  26
   1  -1  -8 15478.4 914.768   1
  -1  -1   8 15271.8 860.628  32
  -1  -1   8 12812.2 649.050  19
   1  -1  -8 14771.1 595.980   8
  -1  -1   7 101719. 2004.93  32
   1  -1  -7 97778.9 1234.84  22
  -1  -1   7 91037.8 1599.20  19
   1  -1  -7 95295.4 2062.94   1
  -1  -1   6 89545.9 1707.58  32
   1  -1  -6 84901.5 1764.13   1
  -1  -1   6 85030.2 1409.78  19
  -1  -1   5 4002.49 328.542  32
   1  -1  -5 2970.99 309.160   1
   1  -1  -5 3230.15 291.972  18
  -1  -1   5 3559.62 259.245  19
  -1  -1   4 10212.2 381.696  19
   1  -1  -4 9467.10 479.130   1
   1  -1  -4 9915.71 438.188  18
  -1  -1   4 10232.4 468.371  32
  -1  -1   3 219046. 1868.80  32
   1  -1  -3 220854. 1720.50  18
   1  -1  -3 216185. 2007.27   1
  -1  -1   2 97039.8 815.581  19
   1  -1  -2 94146.8 1185.74   1
  -1  -1   2 94537.4 986.581  30
  -1  -1   2 95089.5 1058.92  32
   1  -1  -2 96629.1 962.153  18
  -1  -1   1 288068. 1611.77  32
  -1  -1   1 288270. 1402.99  30
  -1  -1   0 286071. 1271.91   2
  -1  -1   0 289464. 1455.56  30
  -1  -1  -1 44718.3 697.702  30
  -1  -1  -1 44585.4 688.741   1
  -1  -1  -2 589907. 2890.18   1
   1  -1   2 610714. 3467.03  19
   1  -1   3 305448. 2409.75  32
   1  -1   3 318394. 2769.59  19
  -1  -1  -4 122372. 1709.79   1
   1  -1   4 128632. 1797.80  32
   1  -1   4 126410. 1955.46  19
  -1  -1  -5 19892.7 771.257   1
   1  -1   5 20226.1 806.246  32
   1  -1   5 21575.2 882.961  19
   1  -1   6 16106.8 830.850  19
   1  -1   6 15720.4 791.847  32
  -1  -1  -6 15208.2 764.864   1
  -1  -1  -6 14359.5 456.364  22
   1  -1   7 7122.97 589.915  32
  -1  -1  -7 7087.75 338.764  33
   1  -1   7 8150.59 636.368  19
  -1  -1  -7 7305.01 598.681   1
   1  -1   8 13971.8 893.200  32
  -1  -1  -8 14933.4 527.256  33
  -1  -1  -8 15095.1 666.632   8
  -1  -1  -8 13897.3 906.790   1
   1  -1   8 15153.6 913.778  19
  -1  -1  -8 13893.2 554.560  17
  -1  -1  -8 12503.2 576.626  26
  -1  -1  -8 14091.6 655.238  24
  -1  -1  -9 1456.62 341.046   1
  -1  -1  -9 886.552 197.968  26
  -1  -1  -9 1095.27 234.365  24
  -1  -1  -9 1110.28 190.456  17
  -1  -1  -9 1177.20 161.832  33
   1  -1   9 890.626 235.193  19
   1  -1   9 1128.22 281.092  32
  -1  -1  -9 1185.14 225.686   8
  -1  -1 -10 947.191 294.060   1
  -1  -1 -10 1344.54 249.639  26
   1  -1  10 1096.25 268.521  19
  -1  -1 -10 753.530 141.129  33
  -1  -1 -10 1260.31 269.134  24
  -1  -1 -10 1284.36 221.238  17
   1  -1  10 1321.79 322.853  32
  -1  -1 -10 1297.13 257.622   8
  -1  -1 -11 3949.94 483.100  13
  -1  -1 -11 3680.01 440.552  24
   1  -1  11 2833.12 487.704  32
  -1  -1 -11 3476.88 419.784   8
  -1  -1 -11 3337.44 393.492  26
  -1  -1 -12 579.131 243.539  13
  -1  -1 -12 286.766 182.266   8
  -1  -1 -12 655.031 268.317  24
  -1  -1 -12 489.819 207.058  26
  -1  -1 -13 361.830 182.170   8
  -1  -1 -13 281.590 204.729  24
  -1  -1 -13 514.339 224.783  13
   1  -1  14 1627.71 249.162  21
  -1  -1 -14 1718.93 278.362   8
  -1  -1 -14 1743.78 294.622  24
  -1  -1 -14 1898.04 316.466  13
   1  -1  15 83.9243 64.9065  21
  -1  -1 -15 321.779 119.563   8
  -1  -1 -15 177.920 114.915  24
   1  -1  15 57.0535 82.5302  23
   1   0 -16 44.4815 93.7563   8
  -1   0  16 75.6944 73.1896  23
   1   0 -15 145.535 138.761  24
   1   0 -15 115.663 117.183   8
  -1   0  15 157.864 109.786  23
   1   0 -14-21.5572 182.318  13
   1   0 -14 64.9541 147.935  24
   1   0 -14-59.0415 118.878   8
   1   0 -13 591.441 235.573  24
   1   0 -13 559.172 211.705   8
   1   0 -13 763.970 261.327  13
   1   0 -13 722.085 165.087   9
   1   0 -12 770.929 171.002   9
   1   0 -12 793.048 225.594   8
  -1   0  12 1330.68 335.818  30
   1   0 -12 1246.47 268.882  24
  -1   0  12 1328.86 353.551  32
   1   0 -12 1148.99 280.530  13
  -1   0  12 1572.58 363.177   2
   1   0 -11 1230.67 269.429  13
  -1   0  11 978.624 280.048  30
  -1   0  11 1567.89 349.989  32
   1   0 -11 1081.14 196.526   9
   1   0 -11 1202.75 208.932  22
   1   0 -11 1064.45 225.930  26
   1   0 -11 1388.86 264.827  24
   1   0 -11 794.022 202.118   8
   1   0 -10 2689.46 277.645  22
   1   0 -10 2390.17 260.025   9
   1   0 -10 2582.34 296.612  26
   1   0 -10 2821.87 342.405  24
   1   0 -10 2783.43 357.045  13
   1   0 -10 2357.07 291.669   8
  -1   0  10 2037.25 374.222  32
   1   0 -10 2442.66 226.956  16
   1   0  -9 28732.4 712.505  16
   1   0  -9 27378.7 1236.68   1
   1   0  -9 29466.6 1036.94  13
  -1   0   9 28260.7 1254.53  32
   1   0  -9 27683.2 849.473  26
   1   0  -9 30558.4 976.959  24
   1   0  -9 28734.4 803.946  22
   1   0  -8 21548.5 641.492  22
  -1   0   8 21624.1 1006.34  32
   1   0  -8 20109.4 982.282   1
   1   0  -7 6115.74 309.294  22
   1   0  -7 5577.45 481.802   1
  -1   0   7 6871.02 518.731  32
  -1   0   7 5508.73 395.188  19
  -1   0   6 6269.82 382.214  19
  -1   0   6 6396.96 451.847  32
   1   0  -6 6329.83 453.307   1
  -1   0   5 36931.2 957.402  32
  -1   0   5 35914.3 819.391  19
   1   0  -5 36847.4 971.633   1
  -1   0   4 69279.0 984.737  19
   1   0  -4 71121.9 1109.10  18
   1   0  -4 71912.1 1192.15   1
  -1   0   4 70463.7 1157.82  32
  -1   0   3 31608.1 524.053  19
   1   0  -3 33323.6 588.777  20
   1   0  -3 34117.9 723.061   1
  -1   0   3 34075.9 685.792  32
   1   0  -3 33194.5 625.428  18
   1   0  -2 268710. 1521.48  20
  -1   0   2 269342. 1719.90  30
  -1   0   2 262745. 941.435  19
  -1   0   2 258937. 1553.70  32
   1   0  -2 270894. 1343.15  18
  -1   0   1 325082. 1538.46  30
   1   0  -1 331044. 1492.17  20
   1   0  -1 331783. 1009.41  18
  -1   0   1 327012. 1498.52   2
   1   0   0 16825.5 336.903  19
  -1   0   0 16787.5 326.519   2
  -1   0   0 16565.8 344.690  30
  -1   0  -1 80455.6 811.165  31
   1   0   1 87110.1 656.994  20
  -1   0  -1 93867.9 970.711  30
  -1   0  -1 100435. 697.534   3
   1   0   1 94914.3 1088.26  19
  -1   0  -2 72782.6 968.901  31
  -1   0  -2 74335.0 665.018   3
   1   0   3 18689.0 681.691  19
  -1   0  -3 17686.7 526.410  31
  -1   0  -3 16864.1 390.178   3
  -1   0  -3 18992.3 559.367   1
  -1   0  -4 43698.4 917.200  31
   1   0   4 44980.5 1179.79  19
  -1   0  -4 43317.8 942.561   1
   1   0   5 40339.6 1137.70  32
   1   0   5 37207.5 1179.01  19
  -1   0  -5 37706.8 998.944   1
  -1   0  -6 36045.2 1105.33   1
   1   0   6 39300.0 1257.00  32
  -1   0  -6 36060.2 717.562  22
   1   0   6 37441.1 1275.10  19
  -1   0  -7 28891.0 721.205  22
  -1   0  -7 30192.2 716.888  33
   1   0   7 32638.5 1263.66  32
   1   0   7 32475.6 1274.98  19
  -1   0  -7 30050.3 1139.57   1
  -1   0  -8 11261.6 492.939  22
  -1   0  -8 12085.1 482.822  33
   1   0   8 12019.6 832.910  32
  -1   0  -8 11570.7 551.176  26
  -1   0  -8 11372.8 774.461   1
  -1   0  -8 11366.3 509.835  17
   1   0   8 12570.1 839.927  19
  -1   0  -8 10188.3 560.934  24
  -1   0  -9 39.8820 76.2325   8
  -1   0  -9-111.807 141.919  24
  -1   0  -9-18.2945 120.368   1
  -1   0  -9-110.605 60.2599  33
   1   0   9 51.6320 133.668  32
   1   0   9-159.454 118.197  19
  -1   0  -9 90.5997 85.4470  17
  -1   0  -9-6.25323 100.593  26
  -1   0 -10-72.5887 137.393  13
  -1   0 -10 55.9754 124.900   8
   1   0  10-71.4452 78.9465  19
  -1   0 -10 56.4262 122.198  26
  -1   0 -10-202.725 87.1662  33
  -1   0 -10-56.0365 155.005  24
  -1   0 -10-10.3737 121.714  17
   1   0  10 216.804 163.394  32
  -1   0 -11 16486.0 928.693  13
  -1   0 -11 16748.9 837.551  26
  -1   0 -11 17681.2 916.356  24
  -1   0 -11 17172.8 870.801   8
   1   0  11 17136.5 1191.84  32
  -1   0 -12 5100.12 515.381   8
  -1   0 -12 4337.64 481.053  26
  -1   0 -12 5353.40 554.274  13
  -1   0 -12 5995.69 555.532  24
  -1   0 -13 3045.03 414.341  13
  -1   0 -13 3470.91 417.412  24
  -1   0 -13 2632.00 381.920   8
  -1   0 -14 353.969 155.758  13
  -1   0 -14 378.022 165.629   8
  -1   0 -14 233.369 152.717  24
   1   0  15 989.141 186.450  21
  -1   0 -15 582.856 149.397   8
  -1   1  16 222.514 93.8451  23
   1   1 -16 281.839 106.681   8
  -1   1  15 823.413 159.800  23
   1   1 -15 858.276 204.608   8
   1   1 -14 777.575 239.224  24
   1   1 -14 851.660 231.358   8
   1   1 -14 761.967 161.511   9
   1   1 -13 9912.50 661.202   8
   1   1 -13 10441.7 588.112   9
   1   1 -13 11276.7 787.411  13
   1   1 -13 11422.4 739.420  24
   1   1 -12 6822.93 610.246  13
   1   1 -12 5934.67 452.141  22
   1   1 -12 7453.22 591.692  24
  -1   1  12 6473.74 704.051  32
   1   1 -12 5940.18 521.000   8
   1   1 -12 6644.36 485.735   9
  -1   1  12 6911.29 737.531   2
   1   1 -11 2547.02 299.626   9
  -1   1  11 2243.75 406.957  30
   1   1 -11 2249.23 278.686  22
   1   1 -11 1683.91 271.182  26
   1   1 -11 2226.16 354.104  13
   1   1 -11 2512.38 359.278  24
  -1   1  11 1897.84 378.028  32
   1   1 -11 1750.37 275.127   8
   1   1 -11 1376.09 186.822  16
   1   1 -10 9811.81 660.618  13
   1   1 -10 9375.96 536.976  26
   1   1 -10 9561.77 559.045   8
  -1   1  10 10072.2 813.585  32
   1   1 -10 10165.6 630.876  24
   1   1 -10 9742.78 515.896  22
   1   1  -9 1362.70 232.288  24
  -1   1   9 1093.62 247.623  32
   1   1  -9 1270.93 180.466  22
   1   1  -9 1211.64 196.172   8
   1   1  -9 1150.93 225.198  13
   1   1  -9 900.701 144.619  16
   1   1  -9 1197.46 186.691  26
   1   1  -8 12286.2 718.693   1
  -1   1   8 13708.2 686.387  19
  -1   1   8 14228.3 813.997  32
   1   1  -8 16247.1 713.019  13
   1   1  -8 14630.5 532.283  22
  -1   1   7 91999.5 1665.48  19
   1   1  -7 95239.6 1804.84   1
   1   1  -6 88298.7 1727.68  31
  -1   1   6 88759.5 1630.03  32
   1   1  -6 90855.1 1588.94   1
   1   1  -5 2579.70 236.246   1
   1   1  -5 2290.63 173.613  20
  -1   1   5 1887.14 204.336  19
  -1   1   5 2459.48 245.713  32
   1   1  -5 2028.79 276.729  31
   1   1  -4 10364.9 464.158   3
   1   1  -4 9970.87 344.767  20
   1   1  -4 9620.82 497.017  31
   1   1  -4 11031.6 421.941   1
  -1   1   4 10385.9 430.858  32
   1   1  -3 201461. 1543.02  20
   1   1  -3 198288. 1960.58  31
  -1   1   3 188778. 1543.36  32
  -1   1   3 180926. 1331.69  19
   1   1  -3 192364. 1849.40   3
   1   1  -2 94153.7 1141.71   3
  -1   1   2 91073.1 915.406   2
  -1   1   2 92093.9 828.875  32
   1   1  -2 93061.4 1182.73  31
   1   1  -1 287661. 2183.17  20
   1   1  -1 311220. 1729.79  31
   1   1  -1 300434. 1678.91   3
  -1   1   0 270603. 1409.93  30
  -1   1   0 268643. 1410.47   2
  -1   1  -1 38108.5 602.633  30
  -1   1  -1 43629.8 609.962   3
  -1   1  -1 36924.6 604.516  31
   1   1   1 41262.3 571.446  20
  -1   1  -2 610905. 2491.42   3
   1   1   2 615716. 3297.93  19
  -1   1  -2 607623. 3630.30  31
  -1   1  -3 271542. 1853.94   3
   1   1   3 274358. 2582.32  19
   1   1   3 269598. 1416.99  20
  -1   1  -4 106480. 1332.13   3
  -1   1  -4 114624. 1885.95  31
   1   1   4 108767. 1868.62  19
  -1   1  -4 113862. 1453.12   1
  -1   1  -5 16262.4 594.036   3
  -1   1  -5 18794.5 667.300   1
   1   1   5 17441.1 827.110  19
  -1   1  -6 13406.0 645.701   1
  -1   1  -6 14373.3 716.361  31
   1   1   6 13800.3 793.432  19
   1   1   6 14785.0 777.819  32
  -1   1  -6 14420.4 453.758  22
  -1   1  -7 7280.82 368.401  33
  -1   1  -7 7688.90 374.811  22
   1   1   7 8183.23 641.674  32
  -1   1  -7 7539.05 550.799   1
   1   1   7 8153.19 650.989  19
  -1   1  -8 13431.1 539.997  22
   1   1   8 14900.7 934.035  32
  -1   1  -8 12700.9 569.894  26
  -1   1  -8 14705.1 678.702  24
   1   1   8 14639.1 917.732  19
  -1   1  -8 14327.4 837.809   1
  -1   1  -8 14310.4 539.984  33
  -1   1  -8 13927.6 574.471  17
  -1   1  -9 959.705 147.769  33
  -1   1  -9 1078.47 232.466  13
  -1   1  -9 1149.75 284.837   1
  -1   1  -9 795.628 168.211  17
  -1   1  -9 1000.68 174.043  22
  -1   1  -9 974.724 233.503  24
   1   1   9 982.905 263.755  32
  -1   1  -9 991.420 213.822   8
   1   1   9 692.530 227.978  19
  -1   1  -9 829.915 186.755  26
  -1   1 -10 1151.09 214.064  17
  -1   1 -10 841.307 210.382  26
  -1   1 -10 860.406 145.730  33
   1   1  10 1915.51 387.534  32
  -1   1 -10 1319.99 277.323  24
  -1   1 -10 1152.18 248.108   8
  -1   1 -10 1203.40 268.362  13
   1   1  10 375.803 167.210  19
  -1   1 -11 3146.30 426.017  13
  -1   1 -11 2901.47 396.463   8
  -1   1 -11 2354.81 241.775  33
  -1   1 -11 2906.51 370.978  26
  -1   1 -11 3552.24 435.161  24
   1   1  11 3245.11 528.141  32
  -1   1 -12 107.863 175.686   8
  -1   1 -12 268.771 188.037  24
  -1   1 -12 527.966 232.301  13
  -1   1 -12 295.620 188.318  26
  -1   1 -13 362.154 195.491  26
  -1   1 -13 522.670 224.987  24
  -1   1 -13 314.709 179.856   8
  -1   1 -13 496.230 227.149  13
  -1   1 -14 1985.73 309.690  13
  -1   1 -14 1774.92 285.530   8
  -1   1 -14 2044.81 302.840  24
  -1   1 -15 55.7784 95.4535   8
   1   1  15 9.58885 72.1850  21
   1   2 -16 312.246 107.567   8
  -1   2  16 93.8154 69.1431  23
  -1   2  15 115.310 88.2581  23
   1   2 -15 58.7317 98.9508   8
   1   2 -14-185.421 99.9754   9
   1   2 -14-30.4261 116.319   8
   1   2 -13 342.856 134.587   9
   1   2 -13 394.591 193.098  24
   1   2 -13 116.162 126.592   8
   1   2 -12 54.3551 136.089  26
   1   2 -12 90.2772 123.959   8
   1   2 -12 123.738 111.750  22
   1   2 -12-42.0524 196.239  24
   1   2 -12-42.5788 210.660  13
   1   2 -12 296.131 134.311   9
   1   2 -12 162.185 77.4836  16
  -1   2  11 731.417 242.185  32
   1   2 -11 691.737 202.064  24
   1   2 -11 744.754 194.817   8
   1   2 -11 904.181 240.736  13
   1   2 -11 865.990 176.891  22
  -1   2  11 316.947 175.435  30
   1   2 -11 552.397 129.069  16
   1   2 -11 663.042 194.434  26
  -1   2  11 1143.36 336.449   2
   1   2 -10 21.6117 62.5634  16
   1   2 -10 597.681 193.326  24
   1   2 -10 411.313 130.875  22
   1   2 -10 94.9331 138.077  13
  -1   2  10-178.296 138.853  32
   1   2 -10 132.881 111.396   8
   1   2 -10 161.727 118.709  26
  -1   2   9 7872.12 653.627  32
   1   2  -9 6785.34 422.912  26
   1   2  -9 8027.82 560.132  13
   1   2  -9 7910.59 521.821  24
   1   2  -9 7253.16 455.765   8
   1   2  -9 7437.78 417.072  22
   1   2  -8 2116.26 207.586  22
   1   2  -8 2409.02 265.970  24
   1   2  -8 2712.79 307.358  13
  -1   2   8 2052.89 305.949  32
   1   2  -7 23507.4 617.082  22
  -1   2   7 20238.6 832.216  19
  -1   2   7 23464.5 935.835  32
   1   2  -7 21184.2 1037.59  31
   1   2  -7 21703.2 789.338   1
  -1   2   6 17142.0 709.311  19
   1   2  -6 16840.4 897.653  31
   1   2  -6 18212.4 642.517   1
   1   2  -6 17710.0 758.703   3
  -1   2   6 19582.7 768.883  32
   1   2  -5 16242.9 481.038  20
   1   2  -5 17229.4 539.731   1
  -1   2   5 16883.9 630.900  32
   1   2  -5 17414.0 765.158  31
   1   2  -5 15628.1 685.199   3
   1   2  -4 23944.1 521.954   1
  -1   2   4 21464.3 593.628  19
   1   2  -4 23839.3 841.334  31
  -1   2   4 22054.7 615.425  32
   1   2  -4 23917.7 661.640  20
   1   2  -4 22630.1 725.006   3
   1   2  -3 140062. 1637.31   3
  -1   2   3 140275. 1283.71  32
  -1   2   3 140338. 1296.71   2
   1   2  -3 142537. 1911.79  31
   1   2  -2 336965. 2588.57  20
  -1   2   2 346359. 2076.98  30
   1   2  -2 340302. 2262.17   3
   1   2  -2 355128. 2779.10  31
  -1   2   2 330400. 1463.69  32
  -1   2   2 332244. 1706.39   2
  -1   2   1 109098. 956.222  30
   1   2  -1 105811. 1228.21  31
  -1   2   1 103337. 846.173   2
   1   2  -1 115788. 1218.90  20
   1   2  -1 114413. 1145.58   3
  -1   2   0 169248. 1086.07  30
  -1   2   0 168019. 1392.76  31
   1   2   0 181396. 1110.04  31
  -1   2   0 166289. 1182.42   2
   1   2   0 179820. 1200.80   3
  -1   2   0 174081. 1390.45   3
   1   2   0 175410. 1371.64  20
   1   2   1 109920. 1054.97  20
  -1   2  -1 101627. 955.429  30
   1   2   1 117991. 844.907  31
  -1   2  -1 109725. 1163.80   3
  -1   2  -1 99698.8 1166.85  31
   1   2   2 1415.12 126.093  20
  -1   2  -2 1407.39 151.532   3
  -1   2  -2 1615.82 204.228  31
   1   2   3 9460.57 323.993  20
  -1   2  -3 10432.4 421.051   3
  -1   2  -3 11354.1 660.586  31
   1   2   3 10841.5 516.839  19
  -1   2  -4 52711.4 1038.80   3
   1   2   4 51028.6 1267.05  19
  -1   2  -4 53023.6 950.267   1
  -1   2  -4 54549.8 1508.54  31
   1   2   5 68246.3 1664.39  19
  -1   2  -5 95073.8 1957.74  31
  -1   2  -5 68370.8 1326.37   3
  -1   2  -5 77699.5 1292.54   1
  -1   2  -6 26415.2 1055.31  31
  -1   2  -6 25118.7 601.889  22
  -1   2  -6 26516.9 852.173   1
   1   2   6 25399.7 1101.05  19
   1   2   7 1199.27 285.356  19
   1   2   7 1695.10 311.598  32
  -1   2  -7 1437.16 167.921  22
  -1   2  -7 1391.86 177.671  33
  -1   2  -7 595.458 163.189   1
  -1   2  -7 1023.28 237.569  31
  -1   2  -7 1334.17 229.319   3
  -1   2  -7 1229.86 167.677  17
  -1   2  -8 2020.72 216.052  22
   1   2   8 1788.51 341.104  19
  -1   2  -8 1642.36 293.475   1
   1   2   8 2015.97 352.320  32
  -1   2  -8 1926.93 224.107  17
  -1   2  -8 2353.84 254.591  26
  -1   2  -8 1889.69 199.953  16
  -1   2  -8 2224.78 280.205  24
  -1   2  -8 2038.13 220.849  33
  -1   2  -8 2250.68 299.376  13
  -1   2  -9 471.549 129.261  16
   1   2   9 296.868 180.046  32
  -1   2  -9 342.933 152.230  24
  -1   2  -9 418.335 154.895  13
  -1   2  -9 364.384 127.401  22
   1   2   9 500.872 187.238  19
  -1   2  -9 335.528 104.702  33
  -1   2  -9 335.688 132.757  17
  -1   2  -9 432.181 149.039  26
  -1   2 -10 13501.3 809.711  13
   1   2  10 13583.7 1022.60  32
   1   2  10 10914.9 857.064  19
  -1   2 -10 13441.9 709.310  26
  -1   2 -10 9905.83 496.419  33
  -1   2 -10 13658.4 743.050   8
  -1   2 -10 15059.0 802.670  24
  -1   2 -11 8036.99 445.223  33
  -1   2 -11 8721.67 683.691  13
  -1   2 -11 7704.87 578.823  26
  -1   2 -11 8979.88 660.868  24
  -1   2 -11 9006.88 641.011   8
   1   2  11 9155.14 867.074  32
  -1   2 -12 559.787 224.282  13
  -1   2 -12 715.069 214.845  26
  -1   2 -12 823.417 265.427  24
  -1   2 -12 375.732 193.787   8
  -1   2 -13 3876.08 415.253  26
  -1   2 -13 4674.25 475.223   8
  -1   2 -13 4563.52 486.024  13
  -1   2 -13 5155.68 498.476  24
  -1   2 -14 131.872 125.486   8
  -1   2 -15 398.925 125.879   8
   1   2  15 499.846 132.529  21
   1   3 -16 165.780 83.7311   8
  -1   3  15 1089.88 161.843  23
   1   3 -15 966.968 198.064   8
   1   3 -14 42.2667 112.006   8
   1   3 -14 17.1203 63.2434   9
   1   3 -13 249.685 112.640  16
   1   3 -13 236.582 122.038  22
   1   3 -13 179.634 131.730   8
   1   3 -13 446.750 145.806   9
   1   3 -12 3317.28 388.768   8
   1   3 -12 3334.62 337.512  22
   1   3 -12 3640.54 330.790  16
   1   3 -12 4283.54 482.359  24
   1   3 -12 3471.42 384.541  26
   1   3 -11 2183.58 358.056  13
   1   3 -11 2390.84 361.730  24
  -1   3  11 1747.97 313.714  32
   1   3 -11 2181.00 274.451  22
   1   3 -11 1744.31 229.100  16
   1   3 -11 1753.57 272.914   8
  -1   3  11 1361.57 325.109  30
   1   3 -11 1749.67 265.859  26
   1   3 -10 2864.69 279.537  16
   1   3 -10 2815.52 240.612  11
   1   3 -10 3295.61 309.339  22
  -1   3  10 2681.04 401.288  32
   1   3 -10 4093.41 437.344  13
   1   3 -10 3203.02 324.314  26
   1   3 -10 3833.47 418.359  24
   1   3 -10 3209.10 338.078   8
   1   3  -9 227.375 107.487   8
   1   3  -9 349.564 132.201  13
  -1   3   9 103.421 100.601  32
  -1   3   9 492.276 186.354   2
   1   3  -9 376.662 141.692  24
   1   3  -9 341.424 83.4172  11
   1   3  -9 468.740 128.185  22
   1   3  -9 341.128 110.610  26
   1   3  -9 711.831 133.068  16
   1   3  -8 1140.64 320.839  31
   1   3  -8 1065.08 149.999  16
   1   3  -8 1664.43 240.359  13
   1   3  -8 1705.36 238.170  24
   1   3  -8 1400.29 182.393  26
   1   3  -8 1538.23 186.361  22
  -1   3   8 1555.22 256.858  19
  -1   3   8 1702.33 275.805  32
   1   3  -8 1540.34 197.732   8
  -1   3   7 37279.1 1214.93  19
  -1   3   7 45554.0 1300.63  32
   1   3  -7 35006.3 760.193  22
   1   3  -7 44792.1 1353.94   3
   1   3  -7 49765.8 1551.51  31
  -1   3   6 6129.23 438.296  19
  -1   3   6 6549.21 444.067  32
   1   3  -6 6495.37 490.446   3
   1   3  -6 6877.00 574.421  31
   1   3  -5 7400.92 556.339  31
   1   3  -5 7027.45 403.803  20
  -1   3   5 6632.79 402.822  19
  -1   3   5 6646.41 396.444  32
   1   3  -5 6271.64 250.170   1
   1   3  -5 6503.53 455.570   3
  -1   3   4 26975.1 679.105  32
   1   3  -4 27694.8 872.541   3
  -1   3   4 26585.6 643.027   2
   1   3  -4 26379.8 1033.26  31
   1   3  -4 25171.8 895.057  20
   1   3  -3 28737.5 1001.13  31
   1   3  -3 27026.6 855.079  20
  -1   3   3 25523.0 533.522   2
   1   3  -3 27763.3 783.748   3
   1   3  -2 38758.6 1008.86  31
   1   3  -2 39735.1 854.549  20
  -1   3   2 37912.5 711.603  30
  -1   3   2 36065.8 525.856   2
   1   3  -2 38497.6 838.196   3
   1   3  -1 191130. 1678.93  20
  -1   3   1 173488. 1129.33   2
   1   3  -1 191742. 1809.09  31
   1   3  -1 187706. 1638.28   3
  -1   3   1 178851. 1277.00  30
  -1   3   1 177501. 1704.10  31
   1   3   0 146227. 1295.54  31
  -1   3   0 141235. 1509.88  31
   1   3   0 136048. 1237.59   3
  -1   3   0 143442. 1456.07   3
  -1   3   0 132497. 936.838  30
   1   3   0 143158. 1408.04  20
   1   3   1 90822.0 845.519   3
   1   3   1 98572.1 1176.96  20
  -1   3  -1 98666.6 1290.23   3
   1   3   1 102367. 1029.79  31
  -1   3  -1 94848.9 1327.94  31
  -1   3  -1 97203.9 899.870  30
   1   3   2 100610. 1204.77  20
  -1   3  -2 104616. 1396.16   3
  -1   3  -2 100461. 1630.58  31
  -1   3  -3 34698.9 559.466  20
   1   3   3 36131.1 741.937  20
  -1   3  -3 41825.7 1301.63  31
  -1   3  -3 39613.8 922.607   3
   1   3   4 22552.4 859.555  19
  -1   3  -4 21850.6 588.198   1
  -1   3  -4 20894.3 1042.38  31
  -1   3  -4 21351.1 740.322   3
   1   3   4 20865.1 581.318  20
  -1   3  -5 56207.2 1040.77   1
  -1   3  -5 53578.9 1281.63   3
  -1   3  -5 61231.0 1793.13  31
   1   3   5 53429.5 1469.65  19
   1   3   5 47893.0 899.509  20
  -1   3  -6 16875.4 577.536  33
  -1   3  -6 18558.1 1038.79  31
  -1   3  -6 18030.1 662.190   1
   1   3   6 15661.9 888.470  19
  -1   3  -6 16180.0 768.852   3
  -1   3  -7 7489.53 408.380  26
  -1   3  -7 7202.82 641.235  31
  -1   3  -7 7516.59 416.583  33
   1   3   7 7169.78 658.199  19
  -1   3  -7 7917.97 414.745  17
   1   3   7 8175.73 645.612  32
  -1   3  -7 7007.50 358.254  22
  -1   3  -7 6763.02 436.898  24
  -1   3  -8 11969.0 743.996   3
  -1   3  -8 14281.1 585.897  33
  -1   3  -8 13624.0 893.972  31
   1   3   8 14905.7 981.606  19
  -1   3  -8 13923.8 550.672  22
  -1   3  -8 9642.61 426.688  11
  -1   3  -8 14213.3 723.824  13
  -1   3  -8 14640.7 627.052  26
  -1   3  -8 14964.3 703.409  24
  -1   3  -8 9067.47 443.072  16
  -1   3  -8 15150.9 625.543  17
   1   3   8 14984.0 944.515  32
  -1   3  -9 22312.5 756.056  22
   1   3   9 24742.0 1305.09  19
  -1   3  -9 15305.1 558.604  11
   1   3   9 24320.3 1286.42  32
  -1   3  -9 24409.2 786.417  33
  -1   3  -9 24295.7 1011.74  13
  -1   3  -9 23303.4 854.853  26
  -1   3  -9 15516.0 621.130  16
  -1   3  -9 23156.8 958.295  24
   1   3  10 6209.90 693.387  32
  -1   3 -10 4199.50 333.542  33
  -1   3 -10 6031.94 415.299  22
  -1   3 -10 6180.75 552.376  13
  -1   3 -10 4040.09 331.490  16
   1   3  10 6177.18 647.062  19
  -1   3 -10 6537.57 547.997  24
  -1   3 -10 6553.57 524.277   8
  -1   3 -10 5795.18 478.379  26
  -1   3 -11 1445.57 204.461  33
  -1   3 -11 1301.49 287.080  24
  -1   3 -11 1018.32 257.340  13
  -1   3 -11 795.013 227.893   8
  -1   3 -11 978.483 229.438  26
  -1   3 -11 978.435 171.915  16
  -1   3 -12 649.962 219.652   8
  -1   3 -12 464.665 214.940  13
  -1   3 -12 428.187 183.011  26
  -1   3 -12 857.920 248.916  24
  -1   3 -13 1499.77 251.358  26
  -1   3 -13 1454.47 285.509   8
  -1   3 -14 648.133 192.946   8
  -1   3 -15-11.1031 84.2394   8
   1   4 -16 424.787 100.765   8
  -1   4  15 76.2386 68.1284  23
   1   4 -15 230.962 101.944   8
   1   4 -14 548.253 133.529  16
   1   4 -14 983.953 188.772   9
   1   4 -14 665.913 173.640   8
   1   4 -13 282.955 149.204   8
   1   4 -13 370.339 141.383  22
   1   4 -13 282.428 118.549  16
   1   4 -12 7570.21 553.642   8
   1   4 -12 7034.07 479.987  22
   1   4 -12 7602.78 481.266  16
   1   4 -12 7517.14 534.355  26
   1   4 -11 2386.98 275.338  16
  -1   4  11 1408.91 338.965  30
  -1   4  11 1750.15 330.266  32
   1   4 -11 2390.35 282.566  22
   1   4 -11 1367.73 183.247  11
   1   4 -11 2059.36 289.455  26
   1   4 -11 2068.06 300.723   8
   1   4 -10 11131.1 612.716   8
   1   4 -10 11159.1 547.713  16
   1   4 -10 11170.2 589.406  26
   1   4 -10 11507.8 564.588  22
   1   4 -10 12703.9 737.109  24
  -1   4  10 10979.4 798.832  32
   1   4  -9 1392.83 197.737  16
   1   4  -9 1511.49 263.778  24
   1   4  -9 1479.51 199.070  22
   1   4  -9 869.412 144.054  11
  -1   4   9 1483.01 280.582  32
   1   4  -9 1841.49 297.718  13
   1   4  -9 1207.56 304.752  31
   1   4  -9 1126.71 195.055   8
   1   4  -9 1305.27 200.543  26
  -1   4   8 6807.26 564.716   2
   1   4  -8 6036.48 365.911  16
   1   4  -8 8090.65 522.426  13
  -1   4   8 5770.67 523.736  19
   1   4  -8 4074.30 273.331  11
   1   4  -8 5921.32 426.525  24
   1   4  -8 6442.50 371.161  26
  -1   4   8 6322.83 528.692  32
   1   4  -8 6225.87 362.196  22
   1   4  -8 4792.74 342.527   8
   1   4  -8 5720.91 598.785  31
   1   4  -7 26386.7 1113.55   3
  -1   4   7 27240.7 994.732  32
  -1   4   7 26780.0 957.601   2
   1   4  -7 28411.2 701.183  22
  -1   4   7 24206.5 1014.66  19
   1   4  -7 25233.2 1281.87  31
   1   4  -6 43338.3 1613.84  31
   1   4  -6 44435.6 777.781  22
  -1   4   6 41665.6 1208.87  19
   1   4  -6 42640.2 1330.58   3
  -1   4   6 39402.5 1027.01   2
  -1   4   6 41744.6 1109.75  32
  -1   4   5 551.136 117.173   2
  -1   4   5 728.708 138.299  32
   1   4  -5 532.155 162.068  20
   1   4  -5 932.300 209.632   3
  -1   4   4 16656.0 479.262   2
   1   4  -4 16821.7 795.691  20
   1   4  -4 19992.6 945.514  31
   1   4  -4 20494.6 792.416   3
   1   4  -3 89016.3 1543.89  20
   1   4  -3 85882.4 1847.23  31
  -1   4   2 13702.5 442.285  30
  -1   4   2 13249.1 478.858   3
  -1   4   2 12470.4 293.224   2
  -1   4   2 13395.3 563.493  31
   1   4  -2 16571.1 719.237  31
   1   4  -2 15520.5 576.321  20
   1   4  -2 14313.0 569.103   3
  -1   4   1 3389.62 246.471   3
   1   4  -1 3680.00 290.441  31
   1   4  -1 3298.12 258.537  20
  -1   4   1 3305.33 270.663  31
  -1   4   1 3405.97 181.282  30
   1   4  -1 3187.48 247.675   3
   1   4   0 270472. 2252.84  20
  -1   4   0 266274. 2365.03  31
   1   4   0 274441. 2162.11  31
  -1   4   0 270179. 2276.48   3
   1   4   0 267838. 1996.21   3
   1   4   1 225867. 2059.90  20
   1   4   1 224705. 1862.85  31
   1   4   1 217212. 1587.06   3
  -1   4  -1 241241. 2263.73   3
  -1   4  -1 244924. 2413.70  31
  -1   4  -2 26500.1 781.404   3
   1   4   2 25709.7 640.094  31
   1   4   2 24898.3 695.318  20
  -1   4  -3 37178.6 990.747   3
   1   4   3 34960.0 840.747  20
  -1   4  -3 38185.2 1298.10  31
  -1   4  -4 12285.2 874.842  31
  -1   4  -4 12832.6 633.317   3
  -1   4  -4 12936.6 440.975   1
   1   4   4 11262.4 489.827  20
   1   4   5 862.530 146.847  20
  -1   4  -5 1175.81 141.356   1
  -1   4  -5 971.492 289.402  31
   1   4   5 1176.18 240.520  19
  -1   4  -5 927.987 202.946   3
   1   4   6 73153.9 1953.26  19
  -1   4  -6 70019.5 1236.00  33
  -1   4  -6 69684.0 1700.58   3
   1   4   7 12288.4 792.001  32
  -1   4  -7 10847.2 445.200  22
  -1   4  -7 11036.1 575.180  13
  -1   4  -7 10803.5 508.895  33
  -1   4  -7 11564.3 518.247  17
  -1   4  -7 11495.0 529.751  14
  -1   4  -7 9173.30 687.771   3
  -1   4  -7 7923.26 385.147  11
  -1   4  -7 10054.4 469.697  26
   1   4   7 10403.1 819.743  19
  -1   4  -7 11139.2 855.063  31
  -1   4  -7 9949.58 538.546  24
  -1   4  -8 3785.92 556.220  31
  -1   4  -8 5256.14 375.956  33
  -1   4  -8 4700.08 360.718  26
   1   4   8 4546.58 526.858  32
  -1   4  -8 4634.08 417.655  13
  -1   4  -8 4510.02 322.365  22
  -1   4  -8 4902.23 417.568  24
  -1   4  -8 5178.40 336.045  11
   1   4   8 4703.08 577.254  19
   1   4   9 1208.89 274.479  32
  -1   4  -9 1337.10 194.526  33
   1   4   9 1308.08 312.111  19
  -1   4  -9 1486.12 204.038  22
  -1   4  -9 1232.89 219.071  26
  -1   4  -9 1463.45 300.410  31
  -1   4  -9 1326.84 205.747  16
  -1   4  -9 1450.83 255.468  13
  -1   4  -9 1473.66 267.758  24
  -1   4  -9 1188.47 179.128  11
  -1   4 -10 7357.28 425.749  11
  -1   4 -10 9840.26 530.673  22
  -1   4 -10 10208.9 547.577  16
  -1   4 -10 12057.1 751.532  13
  -1   4 -10 10668.0 632.586  26
  -1   4 -10 8332.78 476.018  33
   1   4  10 10911.3 898.089  32
  -1   4 -10 11215.5 675.585   8
  -1   4 -10 11681.9 723.816  24
  -1   4 -11 7681.76 450.884  33
  -1   4 -11 9298.56 679.171  13
  -1   4 -11 8084.91 568.060  26
  -1   4 -11 8485.65 617.909   8
  -1   4 -11 8521.15 651.307  24
  -1   4 -12 2875.86 280.957  16
  -1   4 -12 3137.78 374.834  26
  -1   4 -12 3720.57 426.622   8
  -1   4 -13 4255.88 433.208   8
  -1   4 -13 3985.94 384.004  26
  -1   4 -14 52.5548 108.017   8
  -1   4 -15 223.109 91.3799   8
   1   5 -15 392.351 110.374   8
   1   5 -15 269.099 84.6017   9
   1   5 -14 348.324 136.519   8
   1   5 -14 407.156 121.174  16
   1   5 -14 342.202 123.479   9
   1   5 -13 1712.37 238.397  22
   1   5 -13 1945.27 291.460   8
   1   5 -13 2002.81 254.522  16
   1   5 -12 561.963 174.779   8
   1   5 -12 435.250 139.256  22
   1   5 -12 512.891 164.187  16
   1   5 -11 3436.61 348.293  26
   1   5 -11 3554.98 366.670   8
   1   5 -11 2876.04 279.064  11
   1   5 -11 3111.61 322.044  22
   1   5 -11 3244.62 329.068  16
   1   5 -10 2410.09 280.062  26
  -1   5  10 2704.35 458.100  30
   1   5 -10 2396.21 293.941   8
   1   5 -10 2308.24 277.766  16
   1   5 -10 2657.12 266.040  11
   1   5 -10 2474.60 274.302  22
  -1   5  10 2884.67 381.159  32
   1   5  -9 8331.75 825.602  31
  -1   5   9 7961.30 623.961  32
   1   5  -9 10648.4 512.769  22
   1   5  -9 10031.6 519.031  16
   1   5  -9 10487.4 550.746   8
   1   5  -9 10500.3 520.786  26
   1   5  -9 10719.7 503.786  11
   1   5  -8 10495.3 787.819   3
   1   5  -8 11151.0 493.136  26
   1   5  -8 11540.1 494.374  22
   1   5  -8 11026.5 857.435  31
   1   5  -8 12209.5 539.360   8
   1   5  -8 11267.8 522.233  16
  -1   5   8 11395.2 770.171  19
  -1   5   8 10291.0 659.519  32
   1   5  -8 10034.1 472.473  33
   1   5  -8 11560.4 494.325  11
  -1   5   7 2456.22 300.740  32
   1   5  -7 2607.22 223.534  11
   1   5  -7 3195.50 454.457  31
   1   5  -7 3050.95 239.616  22
   1   5  -7 2934.80 409.544   3
   1   5  -7 2806.98 243.513  33
   1   5  -7 3695.32 299.209  14
  -1   5   7 3323.39 399.767  19
  -1   5   6 5566.80 405.742  32
   1   5  -6 4979.12 413.274  20
   1   5  -6 6352.71 558.810   3
   1   5  -6 6658.40 636.530  31
   1   5  -5 28034.6 1157.96  20
   1   5  -5 37408.2 1515.72  31
  -1   5   5 30800.5 843.455  32
  -1   5   5 28242.4 720.882   3
   1   5  -5 35674.7 1242.20   3
   1   5  -4 33777.7 1386.08  31
  -1   5   4 30817.2 790.130   3
   1   5  -4 31557.7 1126.13  20
   1   5  -4 34672.7 1132.31   3
   1   5  -3 6727.86 576.433  31
  -1   5   3 6236.91 357.254   3
   1   5  -3 6814.63 472.086   3
  -1   5   3 6592.74 374.956  30
   1   5  -3 6667.24 464.148  20
  -1   5   3 5524.45 184.096   2
  -1   5   3 6732.76 461.689  31
   1   5  -2 7438.60 530.831  31
  -1   5   2 6550.35 433.798  31
  -1   5   2 6391.97 367.469   3
   1   5  -2 7939.29 454.907  20
  -1   5   2 6779.75 318.315  30
   1   5  -2 7967.30 469.702   3
   1   5  -1 19494.9 670.917   3
   1   5  -1 20353.0 696.655  20
  -1   5   1 18444.9 640.685   3
   1   5  -1 20060.2 750.966  31
  -1   5   1 18838.7 704.828  31
  -1   5   0 20280.5 736.227  31
   1   5   0 20865.1 637.756   3
  -1   5   0 20967.1 707.227   3
   1   5   0 21754.4 693.375  31
   1   5   0 22734.9 738.733  20
  -1   5  -1 115487. 1731.79   3
   1   5   1 103636. 1281.24   3
   1   5   1 107419. 1479.35  31
  -1   5  -1 117546. 1852.33  31
   1   5   1 116008. 1670.66  20
   1   5   2 733.464 127.927  31
  -1   5  -2 798.104 128.897  20
  -1   5  -2 631.732 194.974  31
   1   5   2 1127.87 119.019   3
   1   5   2 835.203 151.660  20
  -1   5  -2 567.352 150.800   3
  -1   5  -3 4139.46 368.973   3
   1   5   3 3608.96 304.778  20
   1   5   3 4072.57 310.982  31
  -1   5  -3 4370.48 484.022  31
  -1   5  -3 3776.26 263.416  20
   1   5   4 18809.5 704.997  31
  -1   5  -4 18429.4 822.782   3
  -1   5  -4 19654.6 1130.51  31
   1   5   4 16724.7 678.010  20
   1   5   5 60777.1 1326.17  20
  -1   5  -5 62754.9 1111.92  33
  -1   5  -5 63247.4 2189.98  31
   1   5   6 4403.60 515.663  19
   1   5   6 3719.18 335.535  20
  -1   5  -6 3959.10 447.751   3
  -1   5  -6 3537.21 294.208  33
  -1   5  -6 3832.30 245.424  22
  -1   5  -6 3830.58 543.779  31
  -1   5  -6 3854.29 271.804  11
  -1   5  -7 27378.1 895.402  13
  -1   5  -7 28135.4 774.388  11
  -1   5  -7 23914.4 1161.57   3
  -1   5  -7 24838.9 676.328  22
  -1   5  -7 23325.1 856.970  24
  -1   5  -7 28520.1 887.682  14
  -1   5  -7 28082.7 1439.95  31
   1   5   7 27287.7 1349.28  19
  -1   5  -7 25599.7 767.271  26
  -1   5  -7 25899.0 827.238  33
  -1   5  -8 1832.60 210.556  22
  -1   5  -8 1584.01 328.037   3
  -1   5  -8 2079.01 285.225  13
  -1   5  -8 2170.43 234.566  11
   1   5   8 2218.37 368.031  32
   1   5   8 2488.87 439.630  19
  -1   5  -8 2142.30 256.349  33
  -1   5  -8 1755.39 231.206  26
  -1   5  -8 1544.39 375.279  31
  -1   5  -8 1701.57 269.819  24
  -1   5  -9 1818.59 239.712  33
   1   5   9 1658.03 338.748  32
  -1   5  -9 1646.18 271.701  13
  -1   5  -9 1766.04 217.873  22
   1   5   9 2130.60 402.633  19
  -1   5  -9 1771.59 226.218  11
  -1   5  -9 1880.59 293.962  24
  -1   5  -9 1942.10 373.289  31
  -1   5  -9 1545.43 233.211  16
  -1   5  -9 1592.07 233.011  26
  -1   5 -10 458.822 144.154  11
  -1   5 -10 345.677 135.665  16
  -1   5 -10 344.096 166.151   8
  -1   5 -10 221.525 99.6660  33
  -1   5 -10 315.202 110.402  22
  -1   5 -10 481.544 164.528  26
  -1   5 -11 1662.66 289.045   8
  -1   5 -11 1881.92 223.772  33
  -1   5 -11 2053.31 241.211  11
  -1   5 -11 1753.67 250.986  16
  -1   5 -11 1915.85 288.085  26
  -1   5 -12 1687.44 259.079  26
  -1   5 -12 1616.79 225.031  16
  -1   5 -12 1842.01 302.262   8
  -1   5 -13 34.5915 96.7178   8
  -1   5 -13 242.555 117.912  26
  -1   5 -14 256.789 122.744   8
   1   5  14 471.473 125.993  21
   1   6 -15 744.231 122.964   9
   1   6 -15 610.409 121.642  16
   1   6 -14 2433.34 260.831   8
   1   6 -14 2975.75 271.511  16
   1   6 -13 1375.39 205.947  22
   1   6 -13 1608.19 240.168   8
   1   6 -13 1757.69 240.547  16
   1   6 -12 1156.81 221.271   8
   1   6 -12 1182.19 199.724  22
   1   6 -12 1109.08 211.561  16
   1   6 -11 4821.86 386.328  26
   1   6 -11 4403.31 362.555  11
   1   6 -11 4522.24 402.334  16
   1   6 -11 4316.52 362.756  22
   1   6 -11 4486.87 400.530   8
   1   6 -10 16693.3 736.865  16
   1   6 -10 15220.8 1075.83  31
   1   6 -10 17529.2 693.988  11
   1   6 -10 16863.6 683.903  22
  -1   6  10 15071.7 1123.65  30
   1   6 -10 16566.6 726.784   8
   1   6 -10 14784.4 644.303  26
   1   6  -9 25906.7 801.172  22
   1   6  -9 25554.9 819.833  11
   1   6  -9 25872.3 865.365  16
   1   6  -9 24548.3 828.475   8
   1   6  -9 24087.7 1334.99  31
  -1   6   9 23019.5 1304.52  30
   1   6  -8 13.4489 31.5741  33
  -1   6   8 574.674 176.704  19
   1   6  -8 706.029 243.435  31
   1   6  -8 191.087 85.9364  22
  -1   6   8 398.127 172.470  30
   1   6  -8 290.783 114.525  11
   1   6  -8 514.858 119.710   8
   1   6  -8 130.090 101.955  16
   1   6  -8 51.5492 122.050   3
   1   6  -7 9075.25 440.345  11
   1   6  -7 6681.53 377.831   7
  -1   6   7 8898.00 682.112  19
   1   6  -7 7787.85 711.542   3
   1   6  -7 8153.12 487.769  14
   1   6  -7 8535.56 818.310  31
  -1   6   7 8058.62 526.228  32
  -1   6   7 8034.74 653.493  30
   1   6  -7 7957.60 389.664  22
   1   6  -6 4570.31 291.875  11
  -1   6   6 3498.88 393.503  30
   1   6  -6 4402.03 352.633  14
   1   6  -6 4004.12 487.319   3
   1   6  -6 3636.45 528.754  31
   1   6  -6 3846.78 249.077  22
   1   6  -6 2545.61 218.954  33
  -1   6   6 3101.81 299.407  32
   1   6  -6 3181.41 387.394  20
   1   6  -5 30356.4 1430.04  31
   1   6  -5 25777.9 573.528  22
   1   6  -5 26118.9 614.287  33
  -1   6   5 23790.9 931.623  30
   1   6  -5 29101.4 1194.50   3
  -1   6   5 23276.6 729.990  32
  -1   6   4 54652.3 1484.41  31
   1   6  -4 51462.9 1531.25  20
  -1   6   4 51897.7 1065.98   3
  -1   6   4 50132.1 1197.67  30
   1   6  -3 3123.40 446.172  31
  -1   6   3 3519.76 274.475  30
  -1   6   3 2893.71 334.981  31
  -1   6   3 3016.98 271.372   3
   1   6  -3 3538.43 366.831  20
   1   6  -3 3374.68 367.488   3
   1   6  -2 8431.25 533.242   3
  -1   6   2 7362.96 500.725  31
  -1   6   2 7326.66 326.651  30
   1   6  -2 7988.33 602.375  31
  -1   6   2 6786.01 415.274   3
   1   6  -1 65955.5 1370.78   3
   1   6  -1 70381.8 1569.44  31
   1   6  -1 71166.6 1468.47  20
  -1   6   1 64095.1 1426.10  31
  -1   6   1 63904.8 1311.11   3
  -1   6   0 5909.97 419.715   3
   1   6   0 6532.82 447.912  20
   1   6   0 6188.72 393.143   3
  -1   6   0 6013.34 455.926  31
   1   6   0 5897.07 412.392  31
   1   6   1 7020.65 424.163  31
   1   6   1 7811.83 487.394  20
   1   6   1 8758.91 429.182   3
  -1   6  -1 7890.90 494.770   3
  -1   6  -1 7468.30 531.281  31
  -1   6  -2 20607.0 842.711   3
   1   6   2 20072.3 790.452  20
   1   6   2 19001.1 695.929  31
  -1   6  -2 19088.0 671.643  20
  -1   6  -3 43871.0 1012.73  20
   1   6   3 43223.6 1082.82  31
  -1   6  -3 51150.3 1382.88   3
  -1   6  -3 45370.8 809.236  33
  -1   6  -3 49724.7 1704.06  31
   1   6   3 46093.0 1220.22  20
  -1   6  -4 17611.3 671.703  20
  -1   6  -4 19657.0 589.078  33
   1   6   4 20447.7 831.195  20
   1   6   4 18877.8 743.803  31
  -1   6  -4 20735.2 945.925   3
  -1   6  -4 20534.2 1239.63  31
   1   6   5 1595.62 238.693  20
   1   6   5 1345.46 218.648  31
  -1   6  -5 1563.63 198.121  33
  -1   6  -5 1402.29 287.267   3
  -1   6  -5 1106.28 341.114  31
  -1   6  -5 1612.87 174.412  11
  -1   6  -5 1548.11 195.865   4
  -1   6  -6 5849.76 433.175  14
   1   6   6 6161.78 627.971  19
  -1   6  -6 4424.51 263.414  22
  -1   6  -6 4304.12 309.982  11
   1   6   6 4723.77 420.831  20
  -1   6  -6 4759.91 353.330  33
  -1   6  -6 4928.22 653.497  31
  -1   6  -6 5027.04 537.423   3
  -1   6  -7 5798.88 606.143   3
  -1   6  -7 4454.93 292.959  22
  -1   6  -7 6546.73 397.273  11
   1   6   7 6721.74 698.718  19
  -1   6  -7 5454.93 407.405  33
  -1   6  -7 7171.71 487.807  14
  -1   6  -7 5609.27 684.232  31
  -1   6  -7 5451.99 356.502  26
  -1   6  -8 1885.10 386.270  31
   1   6   8 2030.20 401.441  19
  -1   6  -8 2388.70 260.095  11
  -1   6  -8 1398.21 208.233  33
  -1   6  -8 1948.21 273.541  14
  -1   6  -8 1746.38 204.040  22
  -1   6  -8 1406.72 210.482  26
   1   6   8 1810.72 339.229  32
  -1   6  -8 1491.46 335.474   3
  -1   6  -9 299.966 110.751  33
  -1   6  -9-298.460 143.985   3
   1   6   9-73.5666 76.9486  32
  -1   6  -9 7.44518 91.8323  16
  -1   6  -9 103.643 112.151  11
  -1   6  -9 130.544 131.740  31
  -1   6  -9 125.841 79.5340  22
   1   6   9-492.645 244.021  19
  -1   6  -9 103.973 86.1623  26
  -1   6 -10 4856.67 361.350  22
  -1   6 -10 4484.58 395.035  16
  -1   6 -10 4985.45 454.562   8
  -1   6 -10 5096.42 423.659  26
  -1   6 -10 5413.23 403.875  11
  -1   6 -10 3581.26 336.677  33
  -1   6 -11 560.337 163.564  26
  -1   6 -11 517.524 176.482   8
  -1   6 -11 674.588 153.042  11
  -1   6 -11 614.008 171.644  16
  -1   6 -11 685.742 149.645  33
  -1   6 -12 2232.31 313.352   8
  -1   6 -12 1541.47 202.136  11
  -1   6 -12 2081.14 253.548  16
  -1   6 -12 2118.43 279.229  26
  -1   6 -13 220.234 83.3633  16
  -1   6 -13 31.1369 92.8630   8
  -1   6 -14 318.606 108.974   8
   1   7 -15 997.477 138.823   9
   1   7 -15 849.126 122.336  16
   1   7 -14 117.980 87.7001   9
   1   7 -14 80.6658 74.6742  16
   1   7 -13 4350.32 357.765  16
   1   7 -13 3241.00 287.133  22
   1   7 -12 4500.81 359.018  22
   1   7 -12 4780.77 385.873   8
   1   7 -12 5450.39 430.166  16
   1   7 -11 336.379 141.277  11
   1   7 -11 235.397 117.871  22
   1   7 -11 108.802 95.9415   8
   1   7 -11 315.137 165.766  16
   1   7 -10 2250.37 260.132  22
  -1   7  10 1644.70 399.089  30
   1   7 -10 2046.05 406.623  31
   1   7 -10 2258.37 302.870  16
   1   7 -10 2578.74 294.657  11
   1   7  -9 1562.86 239.774  16
  -1   7   9 1747.87 365.048  30
   1   7  -9 1771.10 240.944  11
   1   7  -9 1723.84 222.062  22
   1   7  -9 1092.69 299.193  31
   1   7  -8 5038.39 438.213  14
   1   7  -8 3479.42 556.930  31
   1   7  -8 3568.94 311.429   7
   1   7  -8 4621.40 357.221  11
   1   7  -8 3021.08 286.474  33
   1   7  -8 4453.11 320.460  22
   1   7  -8 4151.42 361.373  16
   1   7  -8 3536.81 523.686   3
  -1   7   8 4490.95 528.310  30
  -1   7   8 2900.93 419.295  31
   1   7  -7 293.944 112.059   7
  -1   7   7 473.125 162.161  19
   1   7  -7 380.034 98.2606  22
   1   7  -7 352.381 115.912  11
   1   7  -7 584.332 240.658   3
  -1   7   7 140.774 89.8498  30
   1   7  -7 598.113 165.052  14
  -1   7   7 209.818 124.136  31
   1   7  -7 624.721 243.862  31
   1   7  -7 326.543 83.1170  33
   1   7  -6 236.893 94.4761  11
   1   7  -6 395.208 217.993   3
  -1   7   6 217.472 112.968  30
   1   7  -6 285.596 121.806  14
   1   7  -6 296.529 94.5593  33
  -1   7   6 447.823 168.419  31
   1   7  -6 444.352 236.917  31
   1   7  -6 256.847 78.3358  22
   1   7  -5 1101.44 125.582  22
   1   7  -5 1734.12 245.986  14
   1   7  -5 1713.57 337.041   3
  -1   7   5 887.495 196.152  30
   1   7  -5 1657.50 186.946  11
   1   7  -5 618.256 221.915  20
   1   7  -5 1405.82 161.665  33
  -1   7   5 1420.84 278.872  31
   1   7  -5 1488.28 407.798  31
   1   7  -4 21447.4 1279.36  31
   1   7  -4 21466.0 563.963  33
  -1   7   4 19795.9 752.953  30
   1   7  -4 20693.3 1040.94  20
   1   7  -4 20815.3 496.071  22
  -1   7   4 19407.6 704.930   3
  -1   7   4 21852.6 1002.03  31
   1   7  -3 43486.2 1391.85   3
  -1   7   3 39854.3 1293.36  31
  -1   7   3 35283.5 994.949   3
  -1   7   3 34473.6 836.662  30
   1   7  -3 40481.3 1337.56  20
   1   7  -3 44625.7 1703.13  31
   1   7  -2 5185.86 535.164  31
   1   7  -2 4895.53 449.753   3
  -1   7   2 4790.44 438.876  31
  -1   7   2 4298.37 364.275   3
   1   7  -2 4679.84 437.167  20
  -1   7   1 9357.68 602.350  31
   1   7  -1 9713.50 654.174  31
   1   7  -1 10478.0 633.262  20
   1   7  -1 9121.74 560.830   3
  -1   7   1 8151.50 513.156   3
   1   7   0 1915.05 283.187  20
  -1   7   0 1331.31 228.613   3
   1   7   0 1181.18 197.689   3
  -1   7   0 1785.25 276.591  31
   1   7   1 7179.83 441.384   3
  -1   7  -1 12667.0 681.438   3
  -1   7  -1 12657.8 745.991  31
   1   7   1 7795.85 500.088  31
   1   7   1 9246.57 594.122  20
  -1   7  -1 8349.24 507.200  20
  -1   7  -2 4731.07 376.060  20
   1   7   2 4681.29 388.777  31
   1   7   2 4780.19 328.531   3
  -1   7  -2 5493.24 291.492  33
  -1   7  -2 5764.53 490.031   3
   1   7   2 5862.19 476.391  20
  -1   7  -2 6238.59 583.199  31
  -1   7  -3 13202.3 476.097  33
  -1   7  -3 13386.2 954.425  31
  -1   7  -3 14397.1 799.709   3
   1   7   3 14022.6 747.075  20
   1   7   3 12475.1 639.486  31
  -1   7  -3 12406.4 610.623  20
   1   7   4 12915.7 654.837  31
  -1   7  -4 13905.1 532.771  33
  -1   7  -4 15682.3 886.876   3
   1   7   4 14488.6 780.338  20
  -1   7  -4 15077.0 661.126  14
  -1   7  -4 14616.4 1093.42  31
  -1   7  -4 15403.6 561.778   4
  -1   7  -4 12869.7 644.707  20
  -1   7  -4 16023.5 547.034  11
  -1   7  -5 13950.4 578.281   4
  -1   7  -5 12094.1 836.239   3
  -1   7  -5 12670.6 659.068  14
  -1   7  -5 12348.8 547.182  33
  -1   7  -5 13423.5 536.454  11
   1   7   5 12540.6 740.016  20
  -1   7  -6 26958.8 802.781  11
   1   7   6 31729.2 1493.93  19
  -1   7  -6 26000.3 1274.91   3
   1   7   6 24948.9 1059.28  20
  -1   7  -6 29986.9 1032.35  14
  -1   7  -6 23793.9 809.990  33
  -1   7  -6 22008.2 1448.19  31
  -1   7  -7 17060.6 671.575  11
  -1   7  -7 15399.7 690.844  33
  -1   7  -7 18252.1 811.797  14
  -1   7  -7 15353.4 1186.28  31
   1   7   7 17427.7 1199.79  19
  -1   7  -7 15286.6 589.034  26
   1   7   7 13878.5 847.098  32
  -1   7  -7 15257.9 1025.43   3
  -1   7  -8 1506.62 236.563  33
  -1   7  -8 1793.03 278.890  14
   1   7   8 1394.98 279.947  32
  -1   7  -8 1417.55 222.093  11
  -1   7  -8 1432.06 179.085  22
  -1   7  -8 729.269 147.681  26
  -1   7  -8 1098.91 311.265  31
  -1   7  -8 828.354 271.836   3
   1   7   8 1443.78 350.236  19
  -1   7  -9 432.776 168.815  16
  -1   7  -9 654.906 170.932  11
  -1   7  -9 752.403 172.580  26
  -1   7  -9 875.366 277.053   3
   1   7   9 934.661 297.560  19
  -1   7  -9 191.918 146.103  31
  -1   7  -9 751.496 142.471  22
  -1   7  -9 696.801 203.292  33
  -1   7 -10 2070.93 267.777  26
  -1   7 -10 2348.59 308.152   8
  -1   7 -10 1629.07 233.905  33
  -1   7 -10 1779.67 215.818  22
  -1   7 -10 2615.97 292.250  11
  -1   7 -10 2497.43 315.394  16
  -1   7 -11 3894.35 317.326  33
  -1   7 -11 3931.77 356.831  26
  -1   7 -11 4218.03 379.523  16
  -1   7 -11 3877.51 386.173   8
  -1   7 -11 4151.49 347.227  11
  -1   7 -12 1838.12 266.279   8
  -1   7 -12 1585.79 218.993  26
  -1   7 -12 1965.76 234.877  11
  -1   7 -12 1921.24 245.292  16
  -1   7 -13 1000.26 157.976  16
   1   7  13 891.147 154.183  21
  -1   7 -13 966.411 179.641   8
  -1   7 -14 414.580 107.308   8
   1   8 -14 1461.04 199.654   9
   1   8 -14 1301.17 171.247  16
   1   8 -13 1480.41 214.752  16
   1   8 -13 1106.67 159.466  22
   1   8 -12 1920.99 270.786  16
   1   8 -12 1436.95 201.816  22
   1   8 -11 5358.36 417.484  11
   1   8 -11 5753.09 455.592  16
   1   8 -11 4955.29 368.581  22
   1   8 -10-45.5081 137.234  11
   1   8 -10 44.2937 128.955  16
   1   8 -10 112.401 91.8209  22
   1   8  -9 5617.42 430.610  11
   1   8  -9 5578.24 451.301  16
   1   8  -9 5093.35 387.881  33
   1   8  -9 5520.12 382.073  22
   1   8  -9 4841.21 622.129  31
   1   8  -8 2112.85 250.674  33
   1   8  -8 2495.93 295.628  16
   1   8  -8 2668.30 264.340  22
   1   8  -8 2883.40 302.014  11
   1   8  -8 2618.09 488.197   3
   1   8  -8 2204.83 481.536  31
   1   8  -8 3167.15 367.537  14
   1   8  -7 8559.73 501.500   7
   1   8  -7 13548.8 687.235  14
   1   8  -7 10354.5 464.104  22
   1   8  -7 10103.7 522.408  33
   1   8  -7 11450.0 552.442  11
   1   8  -7 10174.7 889.113   3
  -1   8   7 9044.04 654.447  20
   1   8  -7 11637.7 1004.67  31
  -1   8   7 7997.58 710.722  31
   1   8  -6 1147.69 148.928  22
   1   8  -6 1347.28 239.522  14
  -1   8   6 998.302 249.835  31
   1   8  -6 1304.36 191.611  11
  -1   8   6 1062.49 233.248  20
   1   8  -6 1245.12 177.833  33
   1   8  -6 1048.71 312.377   3
   1   8  -6 1269.09 361.811  31
   1   8  -5 11986.0 491.140  33
   1   8  -5 11419.5 418.610  22
   1   8  -5 12959.3 1064.57  31
   1   8  -5 13292.3 674.899  14
   1   8  -5 12294.2 895.561   3
   1   8  -5 13281.1 534.432  11
  -1   8   5 11953.4 826.474  31
  -1   8   4 22276.7 1077.10  31
   1   8  -4 25472.6 1210.53   3
   1   8  -4 21378.4 534.843  22
   1   8  -4 23837.9 852.013  14
   1   8  -4 23650.7 651.537  33
   1   8  -4 18909.7 594.658  11
   1   8  -4 22991.4 1395.94  31
   1   8  -4 22269.1 1172.73  20
   1   8  -3 12884.4 388.973  22
   1   8  -3 14030.4 1036.80  31
  -1   8   3 13765.5 818.271  31
   1   8  -3 13993.1 863.422  20
  -1   8   3 12038.2 622.675   3
   1   8  -3 15051.7 889.785   3
   1   8  -2 14869.4 977.284  31
   1   8  -2 14294.9 818.160   3
   1   8  -2 14413.3 832.900  20
  -1   8   2 12869.9 677.465   3
  -1   8   2 13270.3 778.865  31
   1   8  -1 23583.7 1040.02  20
   1   8  -1 23485.5 1109.45  31
  -1   8   1 21666.6 991.781  31
  -1   8   1 21638.0 904.069   3
   1   8  -1 22720.3 972.634   3
  -1   8   0 14658.5 750.649  20
  -1   8   0 15435.9 785.342   3
   1   8   0 16264.5 849.729  31
  -1   8   0 16206.8 872.909  31
   1   8   0 14949.5 749.719   3
   1   8   0 17361.5 888.014  20
  -1   8  -1 15012.0 738.781  20
   1   8   1 17186.7 893.702  20
  -1   8  -1 16215.9 836.386   3
   1   8   1 14098.1 682.690   3
   1   8   1 14987.5 774.212  31
  -1   8  -1 16218.4 932.273  31
  -1   8  -2 4787.39 480.461   3
  -1   8  -2 4435.59 285.018  33
   1   8   2 4391.60 415.565  31
  -1   8  -2 4501.96 546.515  31
  -1   8  -2 4065.06 389.248  20
   1   8   2 5498.44 512.657  20
  -1   8  -3 36614.8 1375.52   3
   1   8   3 39358.0 1378.65  20
  -1   8  -3 36854.1 989.560  14
   1   8   3 33994.2 1124.58  31
  -1   8  -3 36134.9 851.698  33
  -1   8  -3 36138.5 1658.53  31
  -1   8  -3 32856.6 1106.56  20
  -1   8  -3 35133.9 836.748   4
  -1   8  -3 36110.9 818.785  11
  -1   8  -4 869.668 161.653   4
  -1   8  -4 708.826 181.067  20
   1   8   4 833.804 210.851  20
  -1   8  -4 882.975 152.810  11
  -1   8  -4 814.292 252.076   3
  -1   8  -4 1038.48 167.234  33
   1   8   4 624.507 163.836  31
  -1   8  -4 847.168 189.855  14
  -1   8  -4 650.344 301.111  31
  -1   8  -5 16280.2 1025.73   3
  -1   8  -5 15817.8 789.541  14
   1   8   5 15894.3 909.330  20
  -1   8  -5 15076.1 1232.57  31
  -1   8  -5 17331.9 685.817   4
  -1   8  -5 17435.3 651.717  11
  -1   8  -5 16016.8 654.178  33
   1   8   6 1112.29 253.200  20
  -1   8  -6 1059.56 367.570  31
   1   8   6 1495.32 384.311  19
  -1   8  -6 1304.04 257.393  14
  -1   8  -6 1378.78 208.891  11
  -1   8  -6 1231.21 217.305  33
  -1   8  -6 488.048 211.651   3
  -1   8  -7 9628.21 929.129  31
   1   8   7 10256.0 943.678  19
  -1   8  -7 9683.66 534.566  11
  -1   8  -7 10910.8 662.110  14
  -1   8  -7 7809.16 768.348   3
  -1   8  -7 9100.99 561.038  33
  -1   8  -8 4608.65 626.659   3
  -1   8  -8 3750.05 641.677  31
  -1   8  -8 6753.47 524.975  14
   1   8   8 6367.72 779.437  19
  -1   8  -8 5843.20 464.480  33
  -1   8  -8 6811.68 461.711  11
  -1   8  -9 6601.74 493.437  16
  -1   8  -9 7301.91 487.252  11
  -1   8  -9 5943.96 448.813  33
  -1   8 -10 1259.10 212.147  33
  -1   8 -10 2259.31 282.237  11
  -1   8 -10 1490.58 241.830   8
  -1   8 -10 2100.02 300.083  16
  -1   8 -11 661.926 180.005   8
  -1   8 -11 484.610 135.673  33
  -1   8 -11 702.601 169.309  11
  -1   8 -11 466.839 158.136  16
  -1   8 -12 492.032 124.978   8
  -1   8 -12 667.919 139.253  11
  -1   8 -12 863.141 176.651  16
  -1   8 -13 16.7882 63.2220  16
   1   9 -14 331.708 105.768   9
   1   9 -14 281.943 90.6748  16
   1   9 -13 507.167 137.087  16
   1   9 -12 89.5063 120.726  16
   1   9 -11 1051.28 218.648  11
   1   9 -11 963.721 219.036  16
   1   9 -11 508.258 120.015  22
   1   9 -10 676.644 218.179  16
   1   9 -10 567.092 169.513  11
   1   9 -10 493.899 133.900  22
   1   9  -9 4095.06 404.240  16
   1   9  -9 4574.68 399.876  11
   1   9  -9 4350.77 335.304  22
   1   9  -9 4099.21 354.942  33
   1   9  -9 3348.07 323.181   7
   1   9  -8 8814.80 881.525   3
   1   9  -8 11122.9 668.234  14
   1   9  -8 8029.12 866.944  31
   1   9  -8 9698.44 480.961  22
   1   9  -8 7028.19 471.763  33
   1   9  -8 5887.96 443.186   7
   1   9  -8 9835.73 581.121  16
   1   9  -8 10794.2 588.327  11
   1   9  -7 3520.29 561.886   3
   1   9  -7 4034.46 357.212  11
   1   9  -7 3458.04 317.718  33
  -1   9   7 3290.14 418.163  20
   1   9  -7 3109.03 344.873   7
   1   9  -7 4278.45 429.167  14
   1   9  -7 3940.56 299.063  22
   1   9  -7 4052.94 632.373  31
  -1   9   7 2238.65 379.711  31
  -1   9   6 4450.52 532.470  31
   1   9  -6 3801.62 273.761  22
   1   9  -6 6538.08 515.112  14
  -1   9   6 5498.82 548.250  20
   1   9  -6 6550.82 726.133   3
   1   9  -6 6040.83 763.990  31
   1   9  -6 6479.10 423.686  11
   1   9  -6 6132.81 403.587  33
   1   9  -5 9015.09 387.706  22
  -1   9   5 10142.2 739.386  20
  -1   9   5 9363.36 763.905  31
   1   9  -5 11085.3 662.823  14
   1   9  -5 11086.8 901.226   3
   1   9  -5 10855.1 517.985  11
   1   9  -5 9661.91 996.294  31
   1   9  -5 11118.2 510.458  33
  -1   9   4 29773.6 1318.64  31
   1   9  -4 34946.7 862.346  11
  -1   9   4 31322.8 1279.84  20
   1   9  -4 29640.1 1464.05  20
   1   9  -4 32695.3 828.772  33
   1   9  -4 31841.6 1730.51  31
   1   9  -4 32875.9 1068.48  14
   1   9  -4 32593.2 1464.65   3
   1   9  -3 17166.4 1232.26  31
   1   9  -3 18009.6 578.467  11
   1   9  -3 17424.2 732.424  14
  -1   9   3 17538.6 957.016  20
   1   9  -3 18586.3 606.148  33
   1   9  -3 19114.8 1072.37   3
  -1   9   3 16566.2 781.957   3
   1   9  -3 18244.2 1083.79  20
  -1   9   3 16391.4 951.323  31
  -1   9   2 17797.6 977.671  31
   1   9  -2 19950.3 1070.56  20
  -1   9   2 16675.2 823.481   3
   1   9  -2 19606.8 1026.74   3
   1   9  -2 18866.0 1191.11  31
  -1   9   2 17210.3 924.361  20
   1   9  -1 1819.84 331.414  20
   1   9  -1 1355.85 281.157   3
   1   9  -1 1606.71 339.744  31
  -1   9   1 1153.66 247.862  20
  -1   9   1 1568.86 271.811   3
  -1   9   1 1467.40 295.344  31
   1   9   0 19077.8 1029.80  20
   1   9   0 16189.6 850.259   3
  -1   9   0 17152.9 892.864   3
  -1   9   0 18634.3 1024.04  31
   1   9   0 17839.7 999.043  31
  -1   9   0 16907.6 882.114  20
   1   9   1 157.214 110.452  31
  -1   9  -1 61.0773 135.898   3
   1   9   1 60.0162 129.247  20
  -1   9  -1 246.878 139.742  31
  -1   9  -1 197.991 124.091  20
   1   9   1 18.7803 87.0852   3
  -1   9  -1 232.941 92.6052  33
   1   9   2 11589.8 736.541  31
  -1   9  -2 12001.4 465.278  11
  -1   9  -2 12747.0 840.756   3
   1   9   2 13337.7 870.560  20
  -1   9  -2 13037.9 992.275  31
  -1   9  -2 11688.1 720.420  20
  -1   9  -2 12679.1 521.940  33
  -1   9  -2 11942.9 492.741   4
  -1   9  -3 2018.49 267.039  14
   1   9   3 1584.23 265.195  31
  -1   9  -3 1236.24 236.723  20
   1   9   3 1893.23 349.152  20
  -1   9  -3 1551.91 394.067  31
  -1   9  -3 1647.23 209.676   4
  -1   9  -3 1845.70 215.621  33
  -1   9  -3 1582.61 188.989  11
  -1   9  -3 1623.69 331.100   3
  -1   9  -4 3065.96 362.395  14
  -1   9  -4 3136.73 480.075   3
  -1   9  -4 2446.18 525.893  31
  -1   9  -4 3605.40 301.761  11
  -1   9  -4 3526.79 312.456  33
  -1   9  -4 3295.47 308.634   4
   1   9   4 3203.08 438.726  20
  -1   9  -5 1357.19 224.950   4
  -1   9  -5 1358.55 214.012  33
  -1   9  -5 1005.36 375.258  31
   1   9   5 1437.84 309.596  20
  -1   9  -5 1129.01 307.041   3
  -1   9  -5 1418.95 282.149  14
  -1   9  -5 1643.72 221.996  11
  -1   9  -6 5778.55 516.169  14
   1   9   6 3724.35 487.511  20
  -1   9  -6 5824.63 450.219  33
  -1   9  -6 5390.95 772.605  31
  -1   9  -6 5976.25 425.890  11
  -1   9  -6 5568.44 664.903   3
  -1   9  -7 5916.48 477.236  33
   1   9   7 7275.90 821.029  19
  -1   9  -7 4558.16 729.111  31
  -1   9  -7 5138.59 663.771   3
  -1   9  -7 7089.55 476.203  11
  -1   9  -7 6447.44 538.847  14
  -1   9  -8 649.829 187.769  11
  -1   9  -8 692.252 200.186  33
  -1   9  -8 397.529 184.742  14
  -1   9  -9 6521.84 502.904  16
  -1   9  -9 7065.05 495.128  11
  -1   9  -9 6149.19 466.771  33
  -1   9 -10 1832.45 239.826  33
  -1   9 -10 2875.53 320.297  11
  -1   9 -10 2848.59 333.619  16
  -1   9 -11 998.799 186.677  11
  -1   9 -11 881.385 195.313  16
  -1   9 -12 231.249 100.545  11
  -1   9 -12 192.865 105.598  16
  -1   9 -13 246.713 87.6446  16
   1  10 -13 146.291 89.7275  16
   1  10 -12 2307.88 261.249  16
   1  10 -11 5596.50 432.232  16
   1  10 -10 5142.65 421.627  11
   1  10 -10 5265.10 440.123  16
   1  10  -9 730.020 183.250   7
   1  10  -9 935.712 199.440  33
   1  10  -9 1491.90 256.586  11
   1  10  -9 1288.94 253.129  16
   1  10  -8 192.023 160.819  14
   1  10  -8-15.5180 117.468   7
   1  10  -8 246.688 143.193  11
   1  10  -8 74.8085 157.734  16
   1  10  -8 78.6645 67.1693  33
   1  10  -7 4555.24 391.227  33
   1  10  -7 4893.71 405.945  11
   1  10  -7 3970.98 407.315   7
   1  10  -7 3269.76 563.716   3
  -1  10   7 3147.73 425.896  20
   1  10  -7 3888.69 623.798  31
   1  10  -7 4254.91 385.338  16
   1  10  -7 5098.53 468.522  14
   1  10  -6 6265.55 436.510  33
   1  10  -6 6422.75 535.803  14
   1  10  -6 5122.95 707.688  31
  -1  10   6 4908.47 548.111  20
   1  10  -6 6250.06 756.606   3
   1  10  -6 6493.04 441.073  11
  -1  10   5 8661.12 742.591  31
  -1  10   5 8907.27 736.492  20
   1  10  -5 9887.40 654.862  14
   1  10  -5 10275.1 923.697   3
   1  10  -5 10933.6 542.315  11
   1  10  -5 11136.6 544.063  33
   1  10  -5 9151.09 956.187  31
   1  10  -4 1355.82 194.142  11
   1  10  -4 1493.69 206.874  33
   1  10  -4 1097.02 370.775  31
   1  10  -4 1308.71 318.367   3
  -1  10   4 1617.71 341.364  31
   1  10  -4 1386.57 273.214  14
  -1  10   4 1264.63 296.238  20
   1  10  -4 496.203 235.446  20
   1  10  -3 15604.8 750.890  14
  -1  10   3 15556.4 985.633  31
   1  10  -3 15881.7 1100.67  20
   1  10  -3 16343.3 576.099  11
   1  10  -3 14999.3 1217.74  31
   1  10  -3 17040.1 632.326  33
   1  10  -3 15705.7 1035.36   3
  -1  10   3 15289.8 955.196  20
  -1  10   2 4806.71 560.604  31
   1  10  -2 4592.11 539.880   3
   1  10  -2 4309.38 377.946  14
  -1  10   2 4330.67 453.356   3
  -1  10   2 4046.53 494.193  20
   1  10  -2 4976.86 591.434  20
   1  10  -2 4420.42 625.354  31
   1  10  -2 4318.79 275.735  11
   1  10  -1 2005.19 406.222  31
   1  10  -1 1344.06 303.445   3
   1  10  -1 2061.17 379.233  20
  -1  10   1 1467.74 294.819  20
  -1  10   1 1272.09 298.939  31
  -1  10   1 1391.29 287.988   3
   1  10   0 5243.99 601.948  20
  -1  10   0 5365.74 550.480   3
   1  10   0 4841.76 573.411  31
   1  10   0 5002.62 508.932   3
  -1  10   0 4408.52 494.583  20
  -1  10   0 5734.49 637.304  31
  -1  10   0 4782.86 302.792   4
  -1  10  -1 16651.1 940.701  20
   1  10   1 16229.5 991.019  31
  -1  10  -1 17003.6 601.846   4
  -1  10  -1 18452.0 1036.60   3
   1  10   1 19163.8 1127.48  20
  -1  10  -1 18691.0 662.053  33
  -1  10  -1 17045.5 1137.92  31
  -1  10  -2 799.425 264.632   3
  -1  10  -2 1121.66 367.482  31
   1  10   2 807.466 270.079  20
  -1  10  -2 986.431 148.472  11
   1  10   2 798.893 217.791  31
  -1  10  -2 1074.96 178.749  33
  -1  10  -2 994.697 172.822   4
  -1  10  -2 804.327 229.173  20
  -1  10  -3 7354.12 867.056  31
  -1  10  -3 7871.13 462.551   4
  -1  10  -3 8157.88 764.953   3
  -1  10  -3 6353.65 578.552  20
   1  10   3 8439.45 774.077  20
  -1  10  -3 7644.99 536.145  14
  -1  10  -3 8075.04 435.728  11
  -1  10  -3 8628.68 484.014  33
  -1  10  -4 13710.0 645.896  33
  -1  10  -4 13597.8 600.507  11
  -1  10  -4 13732.5 643.201   4
  -1  10  -4 14072.0 1023.25   3
  -1  10  -4 13109.6 747.525  14
  -1  10  -4 11031.3 1116.98  31
   1  10   4 13326.9 966.861  20
  -1  10  -5 1769.69 409.254   3
  -1  10  -5 1567.15 238.083  11
  -1  10  -5 1490.90 245.775  33
   1  10   5 1623.08 344.864  20
  -1  10  -5 1396.39 292.023  14
  -1  10  -5 719.327 293.371  31
  -1  10  -6 11371.4 733.170  14
  -1  10  -6 12059.3 617.907  11
  -1  10  -6 10867.3 635.473  33
  -1  10  -6 10042.0 926.210   3
   1  10   6 11020.0 905.929  20
  -1  10  -7 795.642 204.018  11
   1  10   7 995.389 305.063  19
  -1  10  -7 933.343 321.477   3
  -1  10  -7 869.253 247.237  14
  -1  10  -7 629.678 190.530  33
  -1  10  -8 2360.63 310.871  11
  -1  10  -8 1972.11 316.434  14
  -1  10  -8 1959.14 284.866  33
  -1  10  -9 3183.71 344.507  33
  -1  10  -9 3548.91 378.399  16
  -1  10  -9 3516.02 364.894  11
  -1  10 -10 750.603 182.755  11
  -1  10 -10 514.132 135.881  33
  -1  10 -10 701.385 193.213  16
  -1  10 -11 204.254 113.668  11
  -1  10 -11 94.2108 109.383  16
  -1  10 -12 919.866 158.375  16
   1  11 -13 146.771 75.0511  16
   1  11 -12 43.0397 85.1946  16
   1  11 -11 212.651 132.924  16
   1  11 -10 582.368 187.902  16
   1  11  -9 1233.30 222.653   7
   1  11  -9 1356.86 249.250  11
   1  11  -9 1321.89 245.749  16
   1  11  -8 2866.77 334.451  11
   1  11  -8 1650.32 255.982  33
   1  11  -8 2841.25 372.830  14
   1  11  -8 2264.38 305.508  16
   1  11  -8 1836.13 284.579   7
   1  11  -7 1216.94 225.799  16
   1  11  -7 1293.85 271.139  14
   1  11  -7 947.097 198.986  33
   1  11  -7 1493.32 238.167  11
   1  11  -7 917.272 218.896   7
   1  11  -6 2819.35 374.375  14
   1  11  -6 2819.75 311.507  11
   1  11  -6 2597.11 500.037   3
   1  11  -6 2999.10 320.300  33
  -1  11   6 2168.70 380.163  20
   1  11  -6 2305.47 327.123   7
   1  11  -6 1623.58 437.120  31
   1  11  -5 1974.73 250.438  11
   1  11  -5 1841.88 247.068  33
  -1  11   5 1244.14 294.511  31
   1  11  -5 1750.13 311.349  14
  -1  11   5 1627.37 347.012  20
   1  11  -5 1291.72 396.708  31
   1  11  -5 1965.68 458.244   3
  -1  11   4 11985.0 929.271  31
   1  11  -4 12681.4 744.326  14
   1  11  -4 10921.5 1029.79  20
   1  11  -4 12774.8 1026.35   3
  -1  11   4 12877.3 945.855  20
   1  11  -4 11425.0 1109.29  31
   1  11  -4 15026.6 647.182  33
   1  11  -4 13948.2 598.310  11
   1  11  -3 21538.9 1393.50  20
   1  11  -3 20706.8 918.538  14
   1  11  -3 23085.5 1323.01   3
  -1  11   3 21253.5 1236.59  31
   1  11  -3 25174.3 817.067  33
   1  11  -3 19950.5 1463.15  31
   1  11  -3 22815.4 707.487  11
  -1  11   3 23655.6 1269.01  20
   1  11  -2 555.146 263.360  31
   1  11  -2 647.534 273.825  20
   1  11  -2 482.476 212.081   3
  -1  11   2 804.381 252.946  20
  -1  11   2 646.294 246.495  31
   1  11  -2 594.726 177.950  14
   1  11  -1 5346.90 421.145  14
  -1  11   1 4720.48 620.793  31
   1  11  -1 5628.17 681.616  20
  -1  11   1 5944.24 595.034   3
   1  11  -1 5040.37 577.950   3
  -1  11   1 4775.97 571.688  20
   1  11  -1 5504.03 710.650  31
  -1  11   0 7516.94 694.010  20
  -1  11   0 8121.36 714.636   3
   1  11   0 7368.87 776.075  31
  -1  11   0 8994.61 493.648  33
   1  11   0 7609.40 658.569   3
  -1  11   0 7420.37 801.176  31
   1  11   0 8840.30 842.547  20
   1  11   1 980.866 283.267  31
  -1  11  -1 612.064 208.131  20
  -1  11  -1 837.753 156.681   4
   1  11   1 927.362 285.805  20
  -1  11  -1 1004.77 309.434   3
  -1  11  -1 1045.09 305.488  31
  -1  11  -1 1030.01 183.226  33
  -1  11  -2 738.118 200.038  14
  -1  11  -2 346.976 238.848  31
  -1  11  -2 566.241 144.478   4
  -1  11  -2 309.147 165.695  20
  -1  11  -2 631.842 154.360  33
  -1  11  -2 492.715 112.796  11
   1  11   2 371.976 203.167  20
  -1  11  -2 225.619 195.285   3
  -1  11  -3 7615.69 580.425  14
  -1  11  -3 7948.79 447.458  11
  -1  11  -3 5475.08 589.950  20
   1  11   3 8030.77 814.546  20
  -1  11  -3 8142.69 507.610  33
  -1  11  -3 7147.17 919.614  31
  -1  11  -3 7990.51 799.531   3
  -1  11  -3 7644.82 485.008   4
  -1  11  -4 16255.2 753.127  33
  -1  11  -4 13482.7 1055.26   3
  -1  11  -4 15972.5 671.667  11
   1  11   4 15193.9 1113.88  20
  -1  11  -4 14549.7 830.979  14
  -1  11  -5 14030.1 836.407  14
  -1  11  -5 12431.9 1045.24   3
  -1  11  -5 11709.1 1175.35  31
  -1  11  -5 15511.5 695.045  11
  -1  11  -5 14821.1 749.544  33
   1  11   5 10410.3 905.004  20
  -1  11  -6 3451.24 433.912  14
  -1  11  -6 3951.55 372.632  11
  -1  11  -6 3782.09 409.839  33
  -1  11  -7 253.937 182.959  14
  -1  11  -7 114.391 88.7455  33
  -1  11  -7 255.525 150.811  11
  -1  11  -8 1400.69 250.592  16
  -1  11  -8 1688.93 270.437  11
  -1  11  -8 1113.89 229.178  33
  -1  11  -8 1517.10 272.486  14
  -1  11  -8 973.719 175.854   7
  -1  11  -9 3282.78 335.110  11
  -1  11  -9 2482.79 307.155  16
  -1  11  -9 2409.24 298.175  33
  -1  11 -10-20.1803 73.3941  33
  -1  11 -10 237.861 139.472  16
  -1  11 -10 199.210 129.316  11
  -1  11 -11 1827.22 223.736  16
  -1  11 -11 2084.41 228.326  11
  -1  11 -12 853.519 141.463  16
   1  12 -12 145.781 85.2748  16
   1  12 -11 1438.41 204.379  16
   1  12 -10 2353.85 270.725  16
   1  12  -9 1458.41 218.514   7
   1  12  -9 2328.27 290.994  16
   1  12  -8 2971.31 332.355  11
   1  12  -8 2039.01 291.560   7
   1  12  -8 2748.55 346.895  14
   1  12  -8 2327.24 294.243  16
   1  12  -7 1105.83 207.145  16
   1  12  -7 902.575 229.848   7
   1  12  -7 1161.46 234.966  33
   1  12  -7 1368.39 283.370  14
   1  12  -7 1263.70 234.676  11
   1  12  -6 1580.87 254.463  33
   1  12  -6 1600.77 245.933  11
   1  12  -6 1162.11 209.230  16
   1  12  -6 1021.79 261.184  14
   1  12  -6 1158.76 273.337   7
   1  12  -5 2286.99 353.767  14
   1  12  -5 2284.05 272.601  11
   1  12  -5 2521.97 298.274  33
   1  12  -4 1481.81 363.612   3
   1  12  -4 1060.94 371.800  31
   1  12  -4 1605.08 242.436  33
  -1  12   4 1672.51 362.463  20
  -1  12   4 1481.26 337.816  31
   1  12  -4 742.951 305.815  20
   1  12  -4 1156.79 281.054  14
   1  12  -4 1491.97 203.148  11
   1  12  -3 8708.38 626.431  14
  -1  12   3 9198.46 848.557  20
   1  12  -3 7323.69 943.468  31
   1  12  -3 8114.31 832.686   3
  -1  12   3 8639.61 827.274  31
   1  12  -3 10526.9 567.187  33
   1  12  -3 7634.60 868.260  20
   1  12  -2 7661.69 776.693   3
   1  12  -2 8010.12 586.504  14
  -1  12   2 8368.73 804.973  20
   1  12  -2 7497.52 878.791  20
  -1  12   2 7662.59 791.789  31
   1  12  -2 7158.45 866.057  31
   1  12  -2 9102.65 524.342  33
  -1  12   1 1026.26 280.181   3
   1  12  -1 1555.02 403.130  20
   1  12  -1 1046.09 297.700   3
  -1  12   1 1038.54 312.551  20
  -1  12   1 1134.41 338.023  31
  -1  12   1 1327.83 210.129  33
   1  12  -1 1180.42 230.822  14
   1  12  -1 699.897 305.656  31
  -1  12   0 8706.40 816.596  20
   1  12   0 6970.60 509.916  14
  -1  12   0 8000.53 866.125  31
  -1  12   0 9051.26 529.945  33
  -1  12   0 7419.26 736.310   3
   1  12   0 7689.11 858.976  20
  -1  12  -1 5561.22 648.249   3
  -1  12  -1 4130.50 337.364   4
  -1  12  -1 6075.29 444.707  33
   1  12   1 5304.37 712.585  20
  -1  12  -1 5406.99 761.379  31
  -1  12  -1 5166.85 614.719  20
  -1  12  -2 5011.89 770.210  31
  -1  12  -2 5195.00 495.539  14
  -1  12  -2 5296.47 339.811  11
   1  12   2 5495.08 722.158  20
  -1  12  -2 6086.02 455.531  33
  -1  12  -2 5095.11 661.350   3
  -1  12  -2 5881.05 421.489   4
  -1  12  -3 10075.6 704.890  14
  -1  12  -3 9338.11 1082.78  31
   1  12   3 8627.02 896.040  20
  -1  12  -3 10046.8 505.954  11
  -1  12  -3 7137.42 793.320   3
  -1  12  -3 11712.8 643.460  33
  -1  12  -4 7054.94 518.806  33
   1  12   4 7001.86 791.578  20
  -1  12  -4 6464.71 434.849  11
  -1  12  -4 5947.13 568.730  14
  -1  12  -5 3422.64 454.612  14
  -1  12  -5 3656.00 355.721  11
  -1  12  -5 3619.40 401.678  33
  -1  12  -6 34.7958 139.642  33
  -1  12  -6-27.5199 192.000  14
  -1  12  -6 137.174 123.446  11
  -1  12  -7 110.243 165.226  14
  -1  12  -7 0.84942 99.1394   7
  -1  12  -7 122.176 132.896  11
  -1  12  -7 171.606 144.746  33
  -1  12  -8 903.766 232.972  14
  -1  12  -8 784.383 198.356  33
  -1  12  -8 748.226 200.939  16
  -1  12  -8 1095.02 212.241  11
  -1  12  -8 585.820 159.593   7
  -1  12  -9 7.91338 118.578  16
  -1  12  -9 98.2654 113.389  11
  -1  12  -9 103.723 96.6979  33
  -1  12 -10 835.946 161.325  11
  -1  12 -10 739.746 163.027  16
  -1  12 -10 381.306 116.822  33
  -1  12 -11 563.775 124.987  16
   1  13 -11 1323.37 172.244  16
   1  13 -10 1548.49 202.539  16
   1  13  -9 390.670 131.823  16
   1  13  -9 306.732 118.575   7
   1  13  -8 1942.49 252.695  16
   1  13  -8 1304.61 219.400  33
   1  13  -8 1546.79 244.563   7
   1  13  -7 2147.35 272.579  16
   1  13  -7 2067.31 301.757   7
   1  13  -7 2304.37 320.557  14
   1  13  -7 2409.01 306.971  33
   1  13  -6 2669.52 360.625   7
   1  13  -6 2409.06 279.528  16
   1  13  -6 2526.88 314.089  33
   1  13  -6 2444.87 343.577  14
   1  13  -5 1985.40 335.475  14
   1  13  -5 1980.89 253.751  16
   1  13  -5 2156.99 290.545  33
   1  13  -5 1829.38 309.942   7
   1  13  -4 2078.73 273.249  33
   1  13  -4 1813.16 319.742  14
   1  13  -3 741.525 230.894  14
   1  13  -3 1070.96 214.940  33
  -1  13   2 1354.07 355.772  31
  -1  13   2 3000.22 320.619  33
   1  13  -2 3388.72 337.229  33
   1  13  -2 1178.46 374.583  31
   1  13  -2 2715.99 379.237  14
  -1  13   1 14099.0 1098.09  20
  -1  13   1 15099.7 698.365  33
  -1  13   1 13213.0 1170.73  31
   1  13  -1 15748.3 703.968  33
   1  13  -1 12876.6 752.905  14
   1  13  -1 13092.5 1211.23  20
  -1  13   0 4691.35 730.553  31
  -1  13   0 4336.05 611.859  20
  -1  13   0 5174.14 422.931  33
   1  13   0 4452.70 435.054  14
  -1  13  -1 559.587 311.301   3
  -1  13  -1 1487.69 253.473  33
  -1  13  -1 1307.37 289.039  14
  -1  13  -1 1227.17 338.545  20
  -1  13  -2 12965.3 679.997  33
  -1  13  -2 10757.7 742.801  14
  -1  13  -3 2027.32 376.723  14
  -1  13  -3 2296.06 321.638  33
  -1  13  -3 2082.35 234.561  11
  -1  13  -4 774.972 272.761  14
  -1  13  -4 938.929 231.515  33
  -1  13  -4 646.272 159.000  11
  -1  13  -5 453.690 195.960  33
  -1  13  -5 782.210 164.273  11
  -1  13  -5 597.003 253.139  14
  -1  13  -6 203.475 133.194  11
  -1  13  -6 91.3482 169.570  14
  -1  13  -6-85.8404 191.817  33
  -1  13  -7 787.064 185.961   7
  -1  13  -7 1144.11 228.194  33
  -1  13  -7 1115.70 244.874  14
  -1  13  -7 1019.85 209.731  16
  -1  13  -7 1477.99 239.081  11
  -1  13  -8 961.788 190.698  11
  -1  13  -8 630.867 168.689  16
  -1  13  -8 367.480 110.277   7
  -1  13  -8 719.073 166.975  33
  -1  13  -9 140.720 68.2615  33
  -1  13  -9 163.894 111.387  11
  -1  13  -9 17.1199 99.9074  16
  -1  13 -10 55.5637 81.1969  16
   1  14 -10 2414.56 214.648  16
   1  14  -9 2109.72 224.233  16
   1  14  -9 1434.07 178.740   7
   1  14  -8 14.5712 74.6974  33
   1  14  -8 197.271 98.7783   7
   1  14  -8 65.2217 88.3831  16
  -1  14   7 2005.21 248.260  33
   1  14  -7 2279.80 283.355  33
   1  14  -7 2686.49 271.463  16
   1  14  -7 2526.80 313.917  14
   1  14  -7 2235.23 303.630   7
   1  14  -6 1714.40 228.795  16
   1  14  -6 1618.08 279.650   7
   1  14  -6 1626.51 282.648  14
   1  14  -6 1906.67 271.422  33
   1  14  -5 1699.80 299.360  14
   1  14  -5 2036.29 325.624   7
   1  14  -5 2022.31 289.616  33
  -1  14   5 1413.41 231.961  33
   1  14  -5 1740.83 218.660  16
   1  14  -4 10688.3 705.282   7
   1  14  -4 8872.76 626.821  14
   1  14  -4 10753.1 617.246  33
  -1  14   4 8118.25 513.302  33
   1  14  -3 5239.64 500.449   7
   1  14  -3 5073.75 417.955  33
  -1  14   3 4525.18 389.012  33
   1  14  -3 4624.11 471.778  14
  -1  14   2 61.4790 108.642  33
   1  14  -2-96.1762 132.469  14
   1  14  -2 16.3073 116.540  33
  -1  14   1 885.494 234.188  14
   1  14  -1 720.063 217.718  14
   1  14  -1 743.105 186.961  33
  -1  14   1 946.204 205.524  33
  -1  14   0 8962.81 666.333  14
   1  14   0 7819.77 585.064  14
   1  14   0 9103.33 558.743  33
  -1  14   0 9156.92 569.387  33
  -1  14  -1 11458.8 767.635  14
  -1  14  -1 12632.1 667.362  33
   1  14   1 10287.6 611.142   7
   1  14   2 80.2157 92.0935   7
  -1  14  -2 163.026 137.546  33
  -1  14  -2-106.914 184.204  14
  -1  14  -3 1185.00 301.346  14
  -1  14  -3 1659.24 270.585  33
  -1  14  -4 203.086 87.5568  11
  -1  14  -4 166.893 183.251  14
  -1  14  -4 361.784 166.696  33
  -1  14  -5 1927.32 235.093  11
  -1  14  -5 1470.12 262.553  33
  -1  14  -5 1674.18 315.550  14
  -1  14  -6 1275.69 256.585  14
  -1  14  -6 1340.19 241.427   7
  -1  14  -6 1306.61 242.082  33
  -1  14  -6 1522.42 231.531  16
  -1  14  -6 1789.66 235.002  11
  -1  14  -7 172.746 120.083   7
  -1  14  -7 173.305 115.781  11
  -1  14  -7 159.348 122.099  16
  -1  14  -7 169.211 148.299  14
  -1  14  -7 146.417 125.141  33
  -1  14  -8 588.263 145.888  33
  -1  14  -8 532.559 114.145   7
  -1  14  -9 26.7621 77.3440  16
   1  15  -9 11.5294 66.6040  16
   1  15  -8 1570.45 199.929   7
   1  15  -8 1762.10 184.580  16
   1  15  -7 1429.76 217.873   7
   1  15  -7 878.414 164.696  33
   1  15  -7 1111.38 153.035  16
  -1  15   6 344.944 127.249  33
   1  15  -6 226.488 139.930   7
   1  15  -6 394.477 153.759  14
   1  15  -6 550.702 150.805  33
   1  15  -5 1189.69 228.999  14
   1  15  -5 1123.18 244.455   7
  -1  15   5 944.903 181.904  33
   1  15  -5 1223.35 224.495  33
   1  15  -4 1190.35 216.257  33
  -1  15   4 896.791 190.006  33
   1  15  -4 1595.17 295.918   7
   1  15  -4 1132.89 242.032  14
  -1  15   4 871.707 183.166  14
   1  15  -3 1468.72 240.682  33
  -1  15   3 874.217 200.280  14
   1  15  -3 1378.45 261.485  14
   1  15  -3 1657.95 303.553   7
  -1  15   3 1048.78 208.873  33
   1  15  -2 269.448 173.917   7
  -1  15   2-147.274 136.466  14
  -1  15   2-212.123 122.342  33
   1  15  -2 28.9249 126.985  33
   1  15  -2 406.961 160.253  14
  -1  15   1 386.545 190.220  14
   1  15  -1 792.753 230.209  14
  -1  15   1 716.974 180.321  33
   1  15  -1 1001.08 227.164   7
   1  15  -1 768.365 193.382  33
   1  15   0 930.204 215.797   7
  -1  15   0 810.242 189.805  33
  -1  15   0 614.842 218.343  14
   1  15   0 804.794 185.411  33
   1  15   1 2949.13 322.205   7
   1  15   1 3309.15 335.825  33
  -1  15  -1 3776.75 375.875  33
  -1  15  -1 2963.24 391.175  14
   1  15   2 2819.83 308.850  33
  -1  15  -2 3067.29 349.017  33
  -1  15  -2 3131.98 423.356  14
  -1  15  -3 419.916 214.204  14
  -1  15  -3 203.234 133.665  33
  -1  15  -4 1568.19 290.816  14
  -1  15  -4 1650.17 267.367  33
  -1  15  -4 1408.51 200.778  16
  -1  15  -5 176.569 142.314   7
  -1  15  -5 133.004 123.931  33
  -1  15  -5 117.206 152.064  14
  -1  15  -5 120.804 103.360  16
  -1  15  -6 614.324 161.546  33
  -1  15  -6 581.684 145.347  16
  -1  15  -6 584.273 182.160  14
  -1  15  -6 374.590 139.396   7
  -1  15  -7 589.464 135.400   7
  -1  15  -7 607.280 130.611  33
  -1  15  -7 792.588 147.807  16
  -1  15  -8 127.761 83.7389  16
   1  16  -7 357.931 116.455   7
   1  16  -6 1612.09 211.128  33
   1  16  -6 1484.83 220.482   7
   1  16  -5 226.933 126.612   7
  -1  16   5 377.948 113.010  33
   1  16  -5 234.609 113.050  33
   1  16  -5 245.064 122.094  14
   1  16  -4 1879.07 242.490  33
   1  16  -4 1587.56 228.769  14
   1  16  -4 1274.10 246.188   7
  -1  16   4 1232.79 198.840  33
   1  16  -3 166.204 105.256  33
   1  16  -3 289.099 129.138  14
  -1  16   3 292.679 133.442  14
  -1  16   3 307.556 124.654  33
   1  16  -3 533.924 189.391   7
  -1  16   2 991.092 181.759  33
   1  16  -2 799.696 178.588  14
   1  16  -2 1099.27 233.846   7
  -1  16   2 637.779 207.136  14
   1  16  -2 1440.52 224.087  33
  -1  16   1-164.941 139.270  14
   1  16  -1-44.6460 99.6320  33
   1  16  -1-93.4008 134.951   7
  -1  16   1-288.957 129.970  33
   1  16   0 258.543 120.166   7
  -1  16   0 272.362 133.912  33
   1  16   0 333.038 142.897  33
  -1  16   0 243.838 178.607  14
  -1  16  -1 447.212 180.948  14
   1  16   1 547.350 156.126  33
   1  16   1 275.685 111.229   7
  -1  16  -1 462.689 157.147  33
   1  16   2 65.2755 97.0179  33
  -1  16  -2 65.3152 113.132  33
  -1  16  -2-2.10385 145.954  14
  -1  16  -3 308.664 154.869  14
  -1  16  -3 353.860 142.221  33
  -1  16  -3 428.527 170.473   7
   1  16   3 440.114 136.494  33
   1  16   4 833.862 156.917  33
  -1  16  -4 1401.35 217.404  33
  -1  16  -4 1189.33 233.656  14
  -1  16  -4 1290.11 234.520   7
   1  16   5 333.549 126.474  33
  -1  16  -5 383.856 147.162   7
  -1  16  -5 275.911 123.430  33
  -1  16  -5 464.421 166.436  14
  -1  16  -6 352.026 117.418   7
  -1  16  -6 528.900 104.663  16
  -1  16  -6 464.608 136.723  14
   1  17  -6 262.994 100.677   7
   1  17  -5 99.5883 90.3899   7
   1  17  -4 330.929 141.733   7
  -1  17   3 355.866 104.947  33
   1  17  -3 613.984 117.549  14
   1  17  -3 454.056 118.476  33
   1  17  -3 651.368 160.296   7
  -1  17   2 34.8311 71.9195   7
  -1  17   2 62.7902 69.8087  33
   1  17  -2-105.539 78.1097  33
   1  17  -2-4.26932 99.6093   7
   1  17  -1 1273.43 200.020  33
   1  17  -1 1072.47 184.846   7
  -1  17   1 932.325 166.284   7
  -1  17   1 1047.21 190.370  33
  -1  17   1 849.978 173.647  14
  -1  17   0 1386.97 208.797  33
   1  17   0 1378.96 186.170  33
  -1  17   0 1240.24 219.355  14
  -1  17   0 1368.64 220.927   7
   1  17   0 1263.63 176.203   7
  -1  17  -1 229.667 126.222  14
  -1  17  -1 100.058 114.454   7
  -1  17  -1 244.747 104.100  33
   1  17   1 36.6149 81.4761  33
  -1  17  -2-39.1342 107.321   7
  -1  17  -2 11.5143 90.4930  33
   1  17   2 51.4986 73.5465  33
  -1  17  -2 54.0922 101.422  14
   1  17   3 122.249 99.4499  33
  -1  17  -3 73.2492 103.721   7
  -1  17  -3 309.171 122.333  33
  -1  17  -3 177.581 115.465  14
  -1  17  -4 199.473 105.439  14
  -1  17  -4 36.5930 76.8122   7
  -1  17  -5 61.9947 68.6060   7
  -1  17  -5 110.327 68.5151  14
  -1  18  -1 8.48406 70.8669   7
  -2 -18   2 61.6183 67.5639   5
   2 -17  -6 603.072 140.540  28
   2 -17  -5 2060.12 231.839  28
  -2 -17   5 1972.21 193.639  10
  -2 -17   5 2024.22 198.720  24
  -2 -17   5 2231.84 202.917   5
  -2 -17   4 728.824 141.106   5
  -2 -17   4 922.174 149.192  10
  -2 -17   4 792.164 143.617  24
   2 -17  -4 850.639 171.838  28
   2 -17  -3 1045.62 178.289  28
  -2 -17   3 1287.47 181.013   5
  -2 -17   3 626.525 126.781  24
  -2 -17   3 644.526 123.692  10
  -2 -17   2 2079.11 226.871   5
   2 -17  -2 2159.04 232.218  28
  -2 -17   2 1358.50 198.562  24
   2 -17  -2 1895.18 204.552   5
  -2 -17   1 145.867 93.1460  28
   2 -17  -1 171.645 98.8654   5
  -2 -17   1 301.655 114.196  24
  -2 -17   1-19.5914 83.8707   5
  -2 -17   0 1485.22 209.676  28
  -2 -17   0 1153.14 177.352  24
   2 -17   0 1234.36 184.459   5
  -2 -17   0 1365.86 185.646   5
   2 -17   1 140.066 93.7776   5
  -2 -17  -1 88.2548 117.253  28
  -2 -17  -1-11.6883 57.1906  24
  -2 -17  -2 109.006 104.260  28
  -2 -17  -2-23.6765 60.3365  24
   2 -17   2 146.560 94.7502   5
   2 -17   3-13.5306 72.0563   5
  -2 -17  -3 59.6825 91.7258  28
   2 -17   4 286.580 96.1106   5
  -2 -17  -4 178.464 105.240  28
   2 -16  -8 2547.96 248.090  28
  -2 -16   7 1316.58 178.162  24
  -2 -16   7 897.901 125.158   5
   2 -16  -7 1427.50 217.816  28
   2 -16  -6 692.989 180.792  28
  -2 -16   6 937.166 167.440  24
  -2 -16   6 579.428 123.369   5
  -2 -16   5-45.9105 92.0051   5
  -2 -16   5-80.3784 90.5595  24
   2 -16  -5-68.5875 139.804  28
   2 -16  -4 1132.38 213.576  28
  -2 -16   4 960.551 170.180   5
  -2 -16   4 1106.51 198.682  24
  -2 -16   3 51.0888 95.9907  24
  -2 -16   3 46.2631 116.456   5
   2 -16  -3 214.269 137.612  28
   2 -16  -3-159.521 79.5176   5
   2 -16  -2 3580.83 309.326   5
  -2 -16   2 4435.55 391.290  24
  -2 -16   2 4039.04 325.942  10
  -2 -16   2 3855.49 328.844  28
   2 -16  -2 4039.59 359.076  28
  -2 -16   2 4172.48 345.644   5
   2 -16  -1 3549.03 317.616  28
  -2 -16   1 4451.97 374.863  28
   2 -16  -1 4031.76 340.777   5
  -2 -16   1 4161.07 347.089   5
  -2 -16   1 4728.80 410.452  24
  -2 -16   0 121.240 120.387   5
  -2 -16   0 399.979 150.402  24
   2 -16   0 75.3131 104.389   5
  -2 -16   0 20.3758 115.726  28
  -2 -16  -1-127.049 141.213  28
   2 -16   1 113.036 116.360   5
  -2 -16  -1-155.751 121.520  24
  -2 -16  -1 69.7165 93.8349   5
  -2 -16  -2 382.626 148.413  28
  -2 -16  -2 520.366 168.479  24
   2 -16   2 381.350 137.891   5
  -2 -16  -2 319.475 105.817   5
  -2 -16  -3 499.646 151.162  24
   2 -16   3 806.423 168.446   5
  -2 -16  -3 502.788 155.679  28
  -2 -16  -4 1160.40 196.661  24
   2 -16   4 1176.70 188.477   5
  -2 -16  -4 937.228 193.588  28
  -2 -16  -5 291.760 113.431  24
   2 -16   5 185.597 95.5109   5
  -2 -16  -5 209.598 109.670  28
  -2 -16  -6 1205.35 167.211  28
   2 -16   6 1240.22 147.234   5
   2 -15  -9 1744.77 225.396  28
  -2 -15   9 1430.36 184.920  24
  -2 -15   9 1654.33 182.477   6
  -2 -15   8 1405.72 202.635  24
   2 -15  -8 1828.91 254.585  28
  -2 -15   8 1240.93 147.439   5
  -2 -15   8 1365.26 180.772   6
   2 -15  -7 4486.50 409.323  28
  -2 -15   7 4364.87 316.090   6
  -2 -15   7 3747.79 279.048   5
  -2 -15   7 4167.31 360.362  24
  -2 -15   6 704.977 148.383   5
  -2 -15   6 807.108 146.234   6
   2 -15  -6 997.078 238.934  28
  -2 -15   6 543.781 163.075  24
   2 -15  -5 5611.32 484.551  28
  -2 -15   5 5127.17 372.451   5
  -2 -15   5 5806.60 454.020  24
   2 -15  -4 3119.72 366.053  28
  -2 -15   4 2764.41 334.845  24
  -2 -15   4 3104.44 310.489   5
   2 -15  -3 3605.80 313.243   5
  -2 -15   3 4378.46 374.211   5
  -2 -15   3 3938.44 349.959  28
  -2 -15   3 4334.03 408.818  24
   2 -15  -3 4268.77 412.605  28
  -2 -15   2 3182.92 373.296  24
   2 -15  -2 2641.26 321.711  28
  -2 -15   2 2925.36 320.390  28
  -2 -15   2 2748.07 318.882   5
   2 -15  -2 2539.37 285.639   5
  -2 -15   1 3085.26 305.082  10
  -2 -15   1 2983.02 323.103   5
  -2 -15   1 3416.95 375.938  24
  -2 -15   1 3289.98 343.918  28
   2 -15  -1 2861.13 319.536  28
   2 -15  -1 2953.77 317.876   5
  -2 -15   0 6839.62 535.830  24
   2 -15   0 6332.85 464.395   5
  -2 -15   0 6370.00 481.259  28
  -2 -15   0 6312.41 415.540  10
   2 -15   0 5689.97 408.798  28
  -2 -15   0 6571.40 455.153   5
  -2 -15  -1 1239.73 243.031  28
  -2 -15  -1 1484.00 254.418  24
   2 -15   1 1308.54 231.953   5
  -2 -15  -1 1439.39 225.426   5
  -2 -15  -2 664.362 173.348  24
  -2 -15  -2 787.035 162.110   5
  -2 -15  -2 766.172 199.852  28
   2 -15   2 895.162 198.231   5
   2 -15   3 1680.67 246.310   5
  -2 -15  -3 2304.69 305.713  24
   2 -15   3 1671.46 255.092  27
  -2 -15  -3 1615.62 263.777  28
  -2 -15  -4 1162.30 221.963  24
   2 -15   4 1191.76 205.143   5
  -2 -15  -4 1286.47 237.594  28
   2 -15   4 1085.64 213.337  27
  -2 -15  -5 595.990 165.007  24
   2 -15   5 506.204 130.811   5
   2 -15   5 596.920 160.493  27
  -2 -15  -5 704.740 181.756  28
  -2 -15  -6 75.1120 100.279  28
   2 -15   6 208.490 83.8529   6
   2 -15   6 347.079 110.180   5
   2 -15   6 142.588 97.4777  27
  -2 -15  -6 220.660 129.557  24
   2 -15   7 639.211 112.270   5
  -2 -15  -7 265.306 98.1535  28
   2 -15   7 410.511 93.1004   6
  -2 -15  -7 739.293 154.054  24
  -2 -14  11 3298.55 234.906   6
  -2 -14  10 3030.06 251.094   6
   2 -14 -10 2483.01 260.720  28
   2 -14  -9 810.514 191.245  28
  -2 -14   9 819.612 155.902   6
  -2 -14   8 617.876 143.021   6
  -2 -14   8 375.982 98.8680   5
   2 -14  -8 757.227 210.672  28
  -2 -14   7 752.768 199.976  24
  -2 -14   7 1005.33 179.405   6
   2 -14  -7 1062.41 246.934  28
  -2 -14   7 853.910 158.141   5
  -2 -14   6 2486.55 265.133   5
  -2 -14   6 2519.24 338.115  24
  -2 -14   6 1990.75 246.229   6
   2 -14  -6 2890.00 382.103  28
   2 -14  -5 573.179 211.313  28
  -2 -14   5 442.447 147.417   5
  -2 -14   5 352.934 167.002  24
  -2 -14   5 591.100 151.998   6
  -2 -14   4 454.394 125.794   6
  -2 -14   4 421.957 162.968   5
   2 -14  -4 261.119 174.321  28
  -2 -14   4 213.856 157.572  24
  -2 -14   4 600.399 158.618  28
   2 -14  -4 514.829 128.973   5
  -2 -14   3 607.664 183.530   5
   2 -14  -3 422.947 172.057  28
  -2 -14   3 630.604 214.126  24
   2 -14  -3 616.567 145.849   5
  -2 -14   3 792.779 185.881  28
  -2 -14   2 133.712 133.080  24
   2 -14  -2 175.603 120.020   5
  -2 -14   2 144.503 146.816   5
  -2 -14   2 129.217 121.952  28
   2 -14  -2 95.0830 123.779  28
  -2 -14   1 1026.82 228.383  24
  -2 -14   1 1146.06 224.569   5
   2 -14  -1 1052.36 204.603   5
   2 -14  -1 722.229 182.618  28
  -2 -14   1 944.576 211.894  28
  -2 -14   0 565.808 185.694  28
  -2 -14   0 723.297 163.274  10
   2 -14   0 668.947 170.893  28
   2 -14   0 626.300 182.836   5
  -2 -14   0 687.616 194.388  24
  -2 -14   0 767.523 193.973   5
  -2 -14  -1 484.250 177.545  24
   2 -14   1 550.111 169.855  27
  -2 -14  -1 567.433 143.137  10
  -2 -14  -1 349.362 159.879  28
  -2 -14  -1 610.283 167.836   5
   2 -14   1 518.336 179.996   5
   2 -14   2 1115.76 228.827   5
   2 -14   2 937.441 211.091  27
  -2 -14  -2 1014.33 237.460  24
  -2 -14  -2 730.358 204.321  28
  -2 -14  -2 1008.93 181.065   5
  -2 -14  -3 8415.37 570.571  28
   2 -14   3 8675.99 564.616  27
  -2 -14  -3 9945.23 635.733  24
   2 -14   3 8955.23 546.032   5
  -2 -14  -4 1362.31 255.056  24
   2 -14   4 1054.82 220.678  27
  -2 -14  -4 1207.22 245.349  28
   2 -14   4 1412.78 234.061   5
  -2 -14  -5 923.199 214.273  24
   2 -14   5 805.073 196.674  27
   2 -14   5 573.295 140.208   6
  -2 -14  -5 606.982 187.724  28
   2 -14   5 668.188 162.348   5
  -2 -14  -6 249.416 132.773  28
   2 -14   6 387.542 112.610   6
  -2 -14  -6 462.942 170.541  24
   2 -14   6 398.746 147.818  27
   2 -14   6 372.168 125.389   5
   2 -14   7 420.206 118.235   6
   2 -14   7 524.098 118.522   5
  -2 -14  -7 867.637 196.688  24
  -2 -14  -7 606.242 146.618  28
   2 -14   7 532.234 147.176  27
   2 -14   8 201.064 101.688  27
   2 -14   8 92.1509 73.1207   6
  -2 -14  -8 209.833 116.488  24
  -2 -14  -8 212.213 80.6740  28
   2 -14   9 447.663 98.4027   6
  -2 -13  12 1045.79 138.791   6
  -2 -13  11 655.612 134.289   6
   2 -13 -11 477.022 117.290  28
  -2 -13  10 3457.94 301.377   6
   2 -13 -10 3480.00 334.065  28
  -2 -13   9 3440.97 311.456   6
   2 -13  -9 3524.58 378.623  28
  -2 -13   8 2180.99 264.490   6
  -2 -13   8 1859.19 215.224   5
   2 -13  -8 2111.68 328.222  28
  -2 -13   7 1569.82 231.163   6
  -2 -13   7 1565.54 206.371   5
   2 -13  -7 1408.91 279.734  28
  -2 -13   6 1262.81 204.920   5
  -2 -13   6 1348.05 219.569   6
   2 -13  -6 978.023 256.497  28
  -2 -13   5 8481.16 493.159   5
   2 -13  -5 8937.61 636.433  28
  -2 -13   5 8492.52 496.979   6
  -2 -13   4 2070.91 271.337  28
  -2 -13   4 2482.18 347.743  24
  -2 -13   4 2148.30 252.566   6
   2 -13  -4 1861.76 219.212   5
  -2 -13   4 2106.34 270.398   5
   2 -13  -4 1901.73 321.007  28
   2 -13  -3 3027.84 291.871   5
  -2 -13   3 3327.70 336.108   5
   2 -13  -3 3042.28 368.160  28
  -2 -13   3 3278.70 398.445  24
  -2 -13   3 3192.82 330.313  28
  -2 -13   2 5087.56 415.423   5
  -2 -13   2 4688.93 447.565  24
   2 -13  -2 4298.81 411.780  28
  -2 -13   2 4943.76 423.987  28
   2 -13  -2 4370.53 364.235   5
  -2 -13   1 15612.6 741.964  28
  -2 -13   1 16513.8 856.549  24
   2 -13  -1 12287.6 992.864  18
   2 -13  -1 13994.1 693.100  28
   2 -13  -1 14325.9 650.251  27
   2 -13  -1 14440.8 669.947   5
  -2 -13   1 16767.4 731.538   5
   2 -13   0 15735.2 709.325  27
  -2 -13   0 17274.2 831.731  24
  -2 -13   0 16222.3 767.388  28
   2 -13   0 14276.3 676.110  28
  -2 -13   0 16513.7 723.763   5
   2 -13   0 15673.7 708.975   5
   2 -13   1 985.053 214.743   5
  -2 -13  -1 1259.61 249.820  28
  -2 -13  -1 1096.35 240.254  24
  -2 -13  -1 1033.11 205.292   5
  -2 -13  -1 947.202 176.639  10
   2 -13   1 1150.38 221.520  27
  -2 -13  -2 8997.61 589.470  28
  -2 -13  -2 8205.66 489.351   5
   2 -13   2 8577.07 558.031  27
   2 -13   2 9565.47 567.565   5
  -2 -13  -2 10196.8 641.525  24
  -2 -13  -3 2313.26 251.773   5
  -2 -13  -3 3454.99 391.260  24
   2 -13   3 3216.60 340.166   5
   2 -13   3 2900.80 342.076  27
  -2 -13  -3 3096.37 360.256  28
   2 -13   4 1272.32 221.974   5
  -2 -13  -4 1309.82 259.364  24
   2 -13   4 1313.83 250.834  27
   2 -13   4 1304.47 199.850   6
  -2 -13  -4 1140.88 168.466   5
  -2 -13  -4 1095.82 237.973  28
  -2 -13  -5 123.292 127.663  28
   2 -13   5 131.030 102.588   5
   2 -13   5 190.743 148.388  27
  -2 -13  -5 129.859 134.276  24
   2 -13   5 114.002 90.2504   6
   2 -13   6 281.504 113.561   6
  -2 -13  -6 32.6998 149.838  28
  -2 -13  -6 31.1852 155.121  24
   2 -13   6 125.694 121.541  27
   2 -13   6 191.680 101.116   5
   2 -13   7 165.010 96.0328   5
  -2 -13  -7 89.0310 131.013  24
   2 -13   7 413.101 132.034   6
  -2 -13  -7-96.2161 122.650  28
   2 -13   7 162.454 110.672  27
  -2 -13  -8-129.007 121.356  24
  -2 -13  -8 51.7594 77.3668  28
   2 -13   8 41.4084 91.2174   6
   2 -13   8-57.9699 87.5856  27
  -2 -13  -9 2108.87 272.700  24
   2 -13   9 2110.33 218.630  27
   2 -13   9 2200.36 228.630   6
   2 -13  10 1764.36 179.520   6
  -2 -12  12 111.140 83.4000   6
   2 -12 -11 806.003 168.066  28
  -2 -12  11 1367.24 206.118   6
  -2 -12  10 1523.96 223.931   6
   2 -12 -10 1464.83 244.013  28
  -2 -12   9 159.546 117.835   6
   2 -12  -9 79.2380 156.065  28
  -2 -12   8 3078.83 317.283   6
   2 -12  -8 3023.95 374.717  28
  -2 -12   8 2868.01 260.692   5
  -2 -12   7 22.9360 112.024   6
  -2 -12   7 29.0734 73.7531   5
   2 -12  -7 25.6776 162.669  28
  -2 -12   6 1881.80 232.991   5
  -2 -12   6 1864.39 252.190   6
   2 -12  -6 2074.27 334.207  28
  -2 -12   5 1110.57 186.975   6
  -2 -12   5 1158.65 198.625   5
   2 -12  -5 895.883 268.378  18
  -2 -12   5 1281.96 209.757  28
   2 -12  -5 1191.24 272.227  28
   2 -12  -4 6209.55 379.417   5
   2 -12  -4 7221.01 457.100  29
  -2 -12   4 9649.85 525.666   5
   2 -12  -4 7800.36 786.649  18
  -2 -12   4 9356.89 503.091   6
  -2 -12   4 9646.61 539.345  28
   2 -12  -4 9076.90 617.065  28
  -2 -12   3 4375.19 364.056   5
   2 -12  -3 4291.71 418.491  28
   2 -12  -3 4317.82 367.616  29
  -2 -12   3 4692.23 448.136  24
  -2 -12   3 4278.03 378.112  28
  -2 -12   3 2689.52 257.585   6
   2 -12  -3 3825.47 317.936   5
   2 -12  -3 4071.25 568.166  18
   2 -12  -2 8657.37 522.756  29
   2 -12  -2 7517.93 769.838  18
  -2 -12   2 9623.21 632.919  24
   2 -12  -2 8346.00 476.224   5
  -2 -12   2 9144.21 524.286   5
   2 -12  -2 7967.76 534.515  28
  -2 -12   2 8371.91 523.556  28
   2 -12  -1 7684.67 506.671  28
  -2 -12   1 8372.51 500.353   5
   2 -12  -1 7887.81 466.426  27
  -2 -12   1 8956.22 601.172  24
  -2 -12   1 8579.48 534.808  28
   2 -12  -1 8638.99 527.945  29
   2 -12  -1 7951.66 797.438  18
   2 -12  -1 8196.63 481.851   5
   2 -12   0 1761.21 240.743  28
   2 -12   0 2026.94 275.546  29
   2 -12   0 1741.47 239.557  27
  -2 -12   0 1875.59 277.320  24
  -2 -12   0 2045.70 276.085  28
  -2 -12   0 1995.54 260.024   5
   2 -12   0 1915.87 422.421  18
  -2 -12  -1 8872.99 574.049  24
   2 -12   1 6088.80 728.649  18
  -2 -12  -1 6304.42 402.083  10
  -2 -12  -1 8491.98 542.819  28
   2 -12   1 8225.92 522.003  27
  -2 -12  -1 8595.83 496.597   5
   2 -12   1 9578.74 570.585  29
   2 -12   1 7670.50 460.650  28
  -2 -12  -2 5802.94 379.793  10
   2 -12   2 4431.41 620.132  18
  -2 -12  -2 9130.40 589.565  24
   2 -12   2 8041.57 528.678  27
  -2 -12  -2 8039.15 539.147  28
  -2 -12  -2 8236.64 476.553   5
  -2 -12  -3 2064.06 304.262  24
  -2 -12  -3 1794.95 277.099  28
  -2 -12  -3 2063.64 237.304   5
   2 -12   3 1502.32 384.161  18
   2 -12   3 2242.76 304.075  27
   2 -12   3 1598.35 207.600   6
  -2 -12  -4 1999.70 307.726  24
  -2 -12  -4 1838.26 281.880  28
  -2 -12  -4 1774.60 210.290   5
   2 -12   4 2041.13 295.700  27
   2 -12   4 1950.86 238.172   6
   2 -12   5 54.4514 102.745   6
  -2 -12  -5 121.497 135.256  28
   2 -12   5 201.213 148.480  27
  -2 -12  -5-22.5072 135.977  24
   2 -12   6 1076.73 223.214  27
   2 -12   6 895.808 179.491   5
   2 -12   6 1093.82 201.107   6
  -2 -12  -6 1316.71 236.612  28
  -2 -12  -6 1183.33 262.965  24
  -2 -12  -7-50.5782 172.347  24
   2 -12   7 32.1903 86.4209   5
   2 -12   7 20.4291 100.044   6
   2 -12   7 72.1529 107.361  27
  -2 -12  -7 58.6583 109.143  28
  -2 -12  -8 448.551 195.630  24
  -2 -12  -8 486.197 127.691  28
   2 -12   8 516.083 147.903   6
   2 -12   8 374.403 138.212  27
   2 -12   9 1080.56 183.638   6
   2 -12   9 929.395 167.226  27
  -2 -12  -9 1021.84 226.011  24
  -2 -12 -10 2002.82 270.298  24
   2 -12  10 1906.44 214.628   6
   2 -12  10 1434.24 176.060  27
   2 -12  11 614.787 114.441   6
  -2 -11  13 165.659 81.1298   6
  -2 -11  12 178.112 73.3160  23
  -2 -11  12 562.767 136.702   6
   2 -11 -11 654.640 167.266  28
  -2 -11  11 734.173 172.391   6
  -2 -11  11 247.899 100.602  23
  -2 -11  10 643.797 158.669  23
   2 -11 -10 993.239 229.657  28
  -2 -11  10 1023.06 206.006   6
  -2 -11   9 1588.94 235.516  23
  -2 -11   9 1827.22 256.417   6
   2 -11  -9 1426.92 275.614  28
   2 -11  -8 1734.44 302.076  28
  -2 -11   8 2035.63 265.207   6
  -2 -11   8 1754.13 207.917   5
  -2 -11   8 2495.25 293.024  23
  -2 -11   7 773.184 153.916   5
  -2 -11   7 824.176 183.783   6
   2 -11  -7 844.362 218.345  28
  -2 -11   7 900.268 176.128  27
  -2 -11   7 961.737 189.548  23
  -2 -11   6 336.978 132.639  27
   2 -11  -6 187.160 144.426  28
  -2 -11   6 183.320 107.642   6
   2 -11  -6 32.9043 123.304  18
  -2 -11   6 273.980 116.748   5
   2 -11  -5 2810.94 467.057  18
  -2 -11   5 2960.57 291.018  28
   2 -11  -5 3824.81 407.321  28
  -2 -11   5 3765.63 317.368   5
  -2 -11   5 4064.06 350.211  27
  -2 -11   5 4144.52 343.229   6
   2 -11  -4 1769.18 222.625  29
  -2 -11   4 2850.93 293.787  28
  -2 -11   4 2326.49 250.713   6
   2 -11  -4 1419.03 175.980   5
   2 -11  -4 2202.23 317.917  28
   2 -11  -4 2493.99 432.206  18
  -2 -11   4 2512.28 264.602   5
   2 -11  -3 4537.46 356.391  29
   2 -11  -3 4075.64 541.681  18
   2 -11  -3 3600.23 285.723   5
  -2 -11   3 4893.74 384.324  28
  -2 -11   3 3359.11 282.287   6
  -2 -11   3 4920.02 362.726   5
   2 -11  -3 4582.55 411.864  28
  -2 -11   2 2635.58 312.870  24
  -2 -11   2 2220.68 220.050   6
   2 -11  -2 2077.42 397.055  18
  -2 -11   2 2130.90 264.680  28
   2 -11  -2 2195.05 257.285  29
   2 -11  -2 1789.66 255.405  28
   2 -11  -2 1463.79 183.727  27
  -2 -11   2 2447.21 259.724   5
   2 -11  -1 1882.39 395.492  18
  -2 -11   1 2624.28 292.608  28
   2 -11  -1 2452.26 277.455  28
  -2 -11   1 2600.87 270.265   5
   2 -11  -1 2180.44 258.575  29
  -2 -11   1 2817.92 320.492  24
   2 -11  -1 2434.17 249.950  27
   2 -11   0 8019.58 471.189  28
  -2 -11   0 9351.78 561.790  24
   2 -11   0 7901.50 791.390  18
   2 -11   0 8278.26 473.551  27
   2 -11   0 9837.56 531.360  29
  -2 -11   0 9896.48 510.618   5
  -2 -11   0 9070.38 528.130  28
   2 -11   1 317.976 118.449  27
  -2 -11  -1 275.879 109.315   5
  -2 -11  -1 113.994 111.867  24
   2 -11   1 178.474 87.8046  28
  -2 -11  -1 396.117 149.341  28
   2 -11   1 355.705 125.106  29
   2 -11   1 372.743 184.503  18
  -2 -11  -2 15455.0 737.655  24
  -2 -11  -2 14227.9 681.859  28
   2 -11   2 16526.9 711.330  29
   2 -11   2 14991.5 685.488  27
   2 -11   2 14243.4 551.499   6
  -2 -11  -2 14013.7 591.174   5
   2 -11   2 13221.4 1078.02  18
   2 -11   3 17872.6 770.562  27
  -2 -11  -3 17928.6 795.672  24
   2 -11   3 14270.2 1136.51  18
   2 -11   3 12060.2 537.564   6
  -2 -11  -3 13341.5 559.537   5
  -2 -11  -3 15624.2 727.158  28
  -2 -11  -4 2656.56 248.628   5
  -2 -11  -4 3040.26 305.852  12
   2 -11   4 3155.47 342.447  27
   2 -11   4 1726.39 416.946  18
   2 -11   4 2976.44 290.578   6
  -2 -11  -4 2678.89 321.009  28
  -2 -11  -4 2968.15 359.126  24
  -2 -11  -5 16518.0 707.852  12
   2 -11   5 17867.4 794.479  27
   2 -11   5 16910.5 692.041   6
  -2 -11  -5 15851.4 754.745  28
  -2 -11  -6 8133.35 599.387  24
   2 -11   6 8346.64 505.579   6
   2 -11   6 7883.29 536.578  27
  -2 -11  -6 7781.45 504.442  12
  -2 -11  -6 7320.68 507.463  28
  -2 -11  -7 601.347 165.387  12
   2 -11   7 641.083 163.100   6
   2 -11   7 580.766 138.727   5
  -2 -11  -7 399.123 133.874  28
  -2 -11  -7 553.076 200.710  24
   2 -11   7 832.745 195.854  27
  -2 -11  -8 2975.38 386.216  24
   2 -11   8 2131.03 272.278  27
   2 -11   8 2564.39 298.166   6
  -2 -11  -9 533.533 214.941  24
   2 -11   9 524.076 133.254  27
   2 -11   9 833.487 176.699   6
  -2 -11 -10 178.526 143.505  24
   2 -11  10 105.067 92.4306   6
   2 -11  10 141.261 79.4210  27
   2 -11  11 438.785 119.525   6
  -2 -11 -11 210.814 119.715  24
  -2 -10  14 289.937 86.1309   6
  -2 -10  13 901.071 151.342  23
  -2 -10  13 693.394 140.200   6
  -2 -10  12 324.419 127.509   6
  -2 -10  12 551.355 148.707  23
   2 -10 -11 638.498 163.601  28
  -2 -10  11 991.872 190.816  23
  -2 -10  11 1199.92 211.179   6
  -2 -10  10 5543.98 448.480  23
  -2 -10  10 6180.62 441.408   6
   2 -10 -10 5025.22 444.981  28
  -2 -10   9 4925.64 361.730  27
  -2 -10   9 5888.73 465.508  23
  -2 -10   9 5998.87 439.518   6
   2 -10  -9 5242.64 474.318  28
  -2 -10   8 2567.52 287.474   6
  -2 -10   8 2468.40 266.305  27
  -2 -10   8 1934.83 268.068  23
   2 -10  -8 2346.21 326.795  28
   2 -10  -8 2393.25 431.967  18
  -2 -10   7 515.880 121.594   5
   2 -10  -7 753.739 270.097  18
  -2 -10   7 530.882 134.546  27
   2 -10  -7 628.739 203.742  28
  -2 -10   7 582.566 152.912   6
  -2 -10   7 239.101 140.306  32
  -2 -10   7 434.586 136.011  23
   2 -10  -6 11931.2 934.927  18
  -2 -10   6 11783.0 558.348   6
   2 -10  -6 11138.7 669.855  28
  -2 -10   6 11133.8 544.580  27
  -2 -10   6 10938.5 503.282   5
  -2 -10   5 68.6508 86.0764  28
  -2 -10   5 274.333 112.823   6
  -2 -10   5 92.9806 83.7128   5
  -2 -10   5 134.103 88.0682  27
  -2 -10   5 15.1156 69.2103  32
   2 -10  -5-58.3868 127.576  18
   2 -10  -5 104.663 119.173  28
  -2 -10   4 22319.9 736.392  28
  -2 -10   4 23125.3 770.283  27
  -2 -10   4 22909.0 722.440   5
   2 -10  -4 17677.2 562.634   5
  -2 -10   4 21617.1 698.541   6
  -2 -10   4 16003.8 1022.79  32
   2 -10  -4 19880.3 1157.15  18
   2 -10  -4 20683.7 837.538  28
   2 -10  -4 14026.5 563.420  29
   2 -10  -3 29232.9 963.028  28
   2 -10  -3 29195.6 1369.33  18
   2 -10  -3 29596.9 831.841  29
  -2 -10   3 33575.7 915.923  28
  -2 -10   3 35307.7 944.481  27
  -2 -10   3 34179.7 883.605   5
   2 -10  -2 261.412 174.114  18
  -2 -10   2 177.378 90.5391   6
   2 -10  -2 298.309 79.9336  27
   2 -10  -2 84.2105 91.6767  29
  -2 -10   2 37.5320 97.5223   5
  -2 -10   2 34.8343 82.5729  28
   2 -10  -2 207.719 118.578  28
   2 -10  -1 30716.5 858.208  29
  -2 -10   1 34047.6 994.320  24
   2 -10  -1 28649.4 867.415  28
   2 -10  -1 31115.3 1448.72  18
  -2 -10   1 32966.9 926.617  28
  -2 -10   1 34242.8 895.315   5
  -2 -10   0 10734.4 569.599  24
  -2 -10   0 12329.4 579.638  28
   2 -10   0 9954.20 854.052  18
   2 -10   0 10639.4 503.090  27
  -2 -10   0 12606.8 540.020   5
   2 -10   0 11239.6 530.384  29
   2 -10   0 9867.58 494.789  28
   2 -10   1 10701.4 527.344  27
   2 -10   1 10780.4 526.611  29
  -2 -10  -1 10952.1 579.938  24
   2 -10   1 9419.81 858.318  18
  -2 -10  -1 10524.2 542.619  28
  -2 -10  -1 10980.6 499.971   5
  -2 -10  -2 8033.29 425.639   5
  -2 -10  -2 6820.25 556.333  18
   2 -10   2 7343.14 792.426  18
  -2 -10  -2 5312.73 334.725  10
  -2 -10  -2 8111.24 505.522  24
   2 -10   2 8263.11 483.558  27
   2 -10   2 9082.79 493.662  29
   2 -10   2 5117.10 319.712   6
  -2 -10  -2 7814.57 482.134  28
  -2 -10  -3 2573.62 239.042   5
   2 -10   3 3676.80 288.238   6
   2 -10   3 4572.06 377.283  27
  -2 -10  -3 1683.66 367.120   1
  -2 -10  -3 3803.94 356.099  24
   2 -10   3 4578.70 366.260  29
  -2 -10  -3 3738.39 340.553  28
  -2 -10  -3 2577.16 382.645  18
  -2 -10  -3 3517.47 269.219  10
  -2 -10  -4 4665.03 406.166  24
  -2 -10  -4 3459.84 267.467   5
   2 -10   4 5148.38 754.637  19
  -2 -10  -4 3604.37 548.400   1
  -2 -10  -4 2968.88 407.217  18
  -2 -10  -4 3880.27 356.441  28
   2 -10   4 4234.50 328.745   6
  -2 -10  -4 3244.16 296.958  12
   2 -10   4 5058.77 409.149  27
  -2 -10  -5 1038.82 256.659  18
   2 -10   5 1231.27 198.820   6
   2 -10   5 774.798 296.640  19
  -2 -10  -5 1104.81 200.874  12
  -2 -10  -5 1454.66 258.928  24
  -2 -10  -5 1111.41 203.389  28
   2 -10   5 1311.28 226.294  27
  -2 -10  -5 1264.14 417.406   1
  -2 -10  -6 7183.92 489.967  28
  -2 -10  -6 7647.38 712.895  18
  -2 -10  -6 5952.00 446.895  12
  -2 -10  -6 8357.96 593.493  24
   2 -10   6 8108.92 529.458  27
   2 -10   6 8336.90 494.932   6
   2 -10   6 8243.18 956.097  19
   2 -10   7 9383.05 556.808  27
  -2 -10  -7 8105.11 540.856  12
  -2 -10  -7 10132.6 666.456  24
  -2 -10  -7 8164.22 504.601  28
   2 -10   7 9808.39 549.881   6
   2 -10   8 1626.69 254.582  27
   2 -10   8 1718.44 259.457   6
  -2 -10  -8 1317.24 287.499  24
   2 -10   9 2827.68 294.209  27
  -2 -10  -9 3528.50 429.114  24
   2 -10   9 3494.19 340.490   6
   2 -10  10 2196.39 238.910  27
  -2 -10 -10 3131.76 384.263  24
   2 -10  10 3131.41 308.722   6
   2 -10  11 1398.38 201.198   6
  -2 -10 -11 869.633 192.464  13
  -2 -10 -11 1296.50 253.615  24
   2 -10  12 192.751 86.8521   6
  -2 -10 -12 145.315 114.053  24
  -2  -9  14-57.6280 64.9805  23
  -2  -9  14 256.381 81.4170   6
  -2  -9  13 1351.98 208.077  23
  -2  -9  13 1357.67 193.675   6
  -2  -9  12 2403.72 270.319   6
  -2  -9  12 2189.37 281.976  23
  -2  -9  11 596.186 167.208   6
  -2  -9  11 569.007 176.085  23
   2  -9 -11 573.679 180.098  28
  -2  -9  10 80.7550 112.109  23
   2  -9 -10-0.47105 131.956  28
  -2  -9  10-14.6107 144.296   6
   2  -9 -10 106.493 102.002   8
  -2  -9   9 4426.76 332.804  27
  -2  -9   9 5075.00 665.052  32
   2  -9  -9 5564.14 664.654  18
  -2  -9   9 5521.98 418.679   6
   2  -9  -9 5016.45 457.471  28
  -2  -9   9 5725.50 457.623  23
  -2  -9   8 1225.09 283.117   2
   2  -9  -8 1925.76 412.254  18
  -2  -9   8 1712.30 235.805   6
  -2  -9   8 1655.69 245.259  23
   2  -9  -8 1202.53 244.728  28
  -2  -9   8 1461.82 196.052  27
  -2  -9   8 1823.15 395.959  32
  -2  -9   7 6752.68 423.670   6
  -2  -9   7 7160.76 746.415  32
  -2  -9   7 5633.34 336.933   5
  -2  -9   7 6469.54 395.130  27
   2  -9  -7 6132.14 493.383  28
   2  -9  -7 6850.99 699.544  18
  -2  -9   7 7532.64 482.514  23
  -2  -9   6 514.689 113.804   5
  -2  -9   6 521.242 132.143  23
  -2  -9   6 774.117 156.294   6
  -2  -9   6 828.225 258.570  32
   2  -9  -6 769.015 245.875  18
  -2  -9   6 517.419 125.847  27
   2  -9  -6 613.951 173.095  28
  -2  -9   5 9025.73 777.938  32
   2  -9  -5 7624.94 506.579  28
  -2  -9   5 8339.31 437.368  27
   2  -9  -5 7090.43 670.081  18
  -2  -9   5 8678.33 437.648   6
  -2  -9   5 7552.50 397.226  28
  -2  -9   5 8250.34 408.390   5
  -2  -9   4 21009.5 661.359  28
   2  -9  -4 18747.5 756.276  28
  -2  -9   4 22493.5 712.957  27
  -2  -9   4 22321.8 1172.41  32
  -2  -9   4 21220.8 654.512   6
  -2  -9   4 20695.4 683.279  23
  -2  -9   4 22040.0 662.766   5
   2  -9  -4 19791.2 1082.41  18
   2  -9  -4 18199.3 599.568  29
  -2  -9   3 34890.0 867.251  28
  -2  -9   3 34846.8 870.646  27
   2  -9  -3 33174.0 1378.88  18
  -2  -9   3 35326.6 1422.11  32
  -2  -9   3 23149.9 649.868   6
   2  -9  -3 30808.7 922.423  28
  -2  -9   3 35561.8 843.748   5
  -2  -9   2 67.7024 67.3703   5
   2  -9  -2 397.157 120.765  28
  -2  -9   2 308.553 98.2194  28
   2  -9  -2 225.429 78.9852  29
   2  -9  -2 109.883 139.094  18
  -2  -9   2 273.137 87.1653   6
  -2  -9   1 8812.09 469.309  24
   2  -9  -1 9033.49 434.790  29
  -2  -9   1 9556.85 469.707  28
  -2  -9   1 10428.1 460.862   5
   2  -9  -1 7325.55 411.014  28
   2  -9  -1 9192.93 413.639  27
  -2  -9   1 8542.74 529.736  18
   2  -9  -1 8320.82 730.148  18
   2  -9   0 17787.2 1081.41  18
  -2  -9   0 19929.8 682.425  28
  -2  -9   0 20770.3 643.770   5
  -2  -9   0 18806.9 677.165  24
   2  -9   0 18755.3 629.528  29
   2  -9   0 15389.6 567.420  28
  -2  -9   0 19085.2 819.212  18
   2  -9   0 13825.2 534.849  27
  -2  -9  -1 638.708 148.909  24
  -2  -9  -1 476.953 177.690   1
  -2  -9  -1 895.987 146.724   5
  -2  -9  -1 636.897 138.386  28
  -2  -9  -1 817.431 186.221  18
   2  -9   1 700.088 138.686  29
   2  -9   1 792.771 150.788  27
  -2  -9  -2 20316.3 715.279  28
   2  -9   2 22305.8 1379.42  19
  -2  -9  -2 20398.8 726.330  24
  -2  -9  -2 14195.6 968.271   1
  -2  -9  -2 15721.3 812.797  18
  -2  -9  -2 14143.9 503.126  10
   2  -9   2 18692.8 573.294   6
   2  -9   2 21101.0 720.043  27
  -2  -9  -2 15631.6 549.189   5
   2  -9   2 21450.7 697.773  29
   2  -9   3 18334.8 1287.58  19
  -2  -9  -3 16113.5 667.222  24
  -2  -9  -3 14997.3 522.128  10
   2  -9   3 17617.0 650.637  29
  -2  -9  -3 9965.24 433.275   5
   2  -9   3 15158.0 551.669   6
  -2  -9  -3 15772.2 1112.77   1
   2  -9   3 17429.2 680.488  27
  -2  -9  -3 15104.6 638.215  28
  -2  -9  -3 12645.0 773.241  18
  -2  -9  -4 1190.43 261.401  18
  -2  -9  -4 1501.34 236.089  24
   2  -9   4 2061.76 243.189  29
  -2  -9  -4 1414.14 173.065   5
   2  -9   4 1673.21 203.343   6
  -2  -9  -4 1449.50 211.468  28
  -2  -9  -4 1555.78 395.246   1
   2  -9   4 1827.67 423.754  19
   2  -9   4 2080.78 255.393  27
  -2  -9  -5 1701.87 264.356  24
  -2  -9  -5 2051.19 252.261  12
  -2  -9  -5 1637.00 432.044   1
   2  -9   5 2170.46 266.732  27
   2  -9   5 1946.68 228.695   6
  -2  -9  -5 1796.61 239.258  28
  -2  -9  -5 891.174 249.896  18
   2  -9   5 1814.00 438.485  19
   2  -9   6 6413.73 825.350  19
  -2  -9  -6 5828.77 437.726  12
  -2  -9  -6 4713.76 744.279   1
  -2  -9  -6 6324.58 497.157  24
  -2  -9  -6 3910.23 508.344  18
   2  -9   6 5842.45 405.310   6
  -2  -9  -6 4070.15 358.662  28
   2  -9   6 5815.25 430.437  27
   2  -9   7 14251.1 1225.64  19
   2  -9   7 17791.9 752.162  27
  -2  -9  -7 17573.4 786.643  12
  -2  -9  -7 18733.9 874.229  24
  -2  -9  -7 13712.0 630.666  28
   2  -9   7 17775.2 725.433   6
  -2  -9  -7 14120.4 1286.04   1
   2  -9   8 8791.61 529.722  27
   2  -9   8 9482.84 546.160   6
  -2  -9  -8 9762.12 668.255  24
   2  -9   9 4675.43 399.263   6
  -2  -9  -9 4991.55 497.361  24
   2  -9   9 3965.95 347.487  27
   2  -9  10 857.278 164.861  27
  -2  -9 -10 913.623 240.726  24
   2  -9  10 1278.90 225.745   6
  -2  -9 -11 570.104 215.081  24
   2  -9  11 557.268 153.685   6
   2  -9  12 127.944 97.3563   6
  -2  -9 -12-101.955 110.585  13
  -2  -9 -12 244.450 153.433  24
  -2  -9 -13 147.809 108.546  24
  -2  -8  15 198.040 77.2479  23
  -2  -8  14 699.904 148.145  23
  -2  -8  14 352.897 89.0066   6
   2  -8 -14 440.092 121.411   8
  -2  -8  13 1560.08 239.604  23
   2  -8 -13 1443.51 227.374   8
  -2  -8  13 1893.26 226.418   6
   2  -8 -12 698.380 180.430   8
  -2  -8  12 1036.49 208.260  23
  -2  -8  11 934.287 218.386  23
   2  -8 -11 543.739 167.356   8
  -2  -8  11 733.085 176.907   6
   2  -8 -11 521.934 161.163  28
  -2  -8  10 21360.9 783.584   6
   2  -8 -10 13740.3 704.319  28
  -2  -8  10 21655.4 877.290  23
   2  -8 -10 15130.1 750.196   8
  -2  -8   9 17612.7 1081.80   2
  -2  -8   9 17205.1 763.021  23
  -2  -8   9 17299.8 689.251   6
   2  -8  -9 12419.3 977.852  18
   2  -8  -9 15456.0 762.749  28
  -2  -8   9 14482.7 558.605  27
   2  -8  -9 11989.6 644.393   8
  -2  -8   9 17715.0 1272.22  32
   2  -8  -8 1700.49 272.427  28
  -2  -8   8 1935.98 413.192  32
  -2  -8   8 1801.84 250.763  23
   2  -8  -8 1613.50 350.569  18
  -2  -8   8 1764.88 340.440   2
   2  -8  -8 1608.80 230.169   8
  -2  -8   8 1967.57 237.429   6
  -2  -8   8 1833.15 206.953  27
  -2  -8   7 4255.66 352.871  23
   2  -8  -7 3472.47 357.109  28
  -2  -8   7 3974.97 311.211   6
  -2  -8   7 4360.77 492.209   2
   2  -8  -7 3615.66 502.641  18
   2  -8  -7 3613.23 315.019   8
  -2  -8   7 3822.16 288.349  27
  -2  -8   7 3157.11 232.563   5
  -2  -8   7 4557.98 584.497  32
  -2  -8   6 7542.70 393.865  27
  -2  -8   6 5873.76 533.922   2
  -2  -8   6 7729.09 412.020   6
   2  -8  -6 7289.30 676.796  18
   2  -8  -6 7540.47 496.706  28
  -2  -8   6 5782.66 387.478  23
   2  -8  -6 7309.31 412.723   8
  -2  -8   6 8234.81 755.156  32
  -2  -8   6 7587.53 363.658   5
  -2  -8   5 3817.68 257.823   5
  -2  -8   5 4308.21 519.948  32
  -2  -8   5 4194.31 290.293   6
  -2  -8   5 4060.88 289.592  27
  -2  -8   5 3630.20 281.592  23
   2  -8  -5 3343.66 319.971  28
   2  -8  -5 3972.28 490.092  18
  -2  -8   5 4357.33 426.119   2
  -2  -8   4 7378.56 644.373  32
  -2  -8   4 5527.31 316.638   6
  -2  -8   4 6506.15 463.209   2
   2  -8  -4 7402.37 445.038  28
  -2  -8   4 5356.81 320.651  27
   2  -8  -4 6064.59 565.197  18
  -2  -8   4 5445.47 308.198   5
  -2  -8   3 51804.0 980.081  27
   2  -8  -3 43146.8 1009.04  28
   2  -8  -3 47059.0 1540.84  18
  -2  -8   3 51659.7 927.361   5
  -2  -8   3 43221.3 1115.57  18
  -2  -8   3 50574.3 1624.10  32
  -2  -8   2 291.596 137.362  32
  -2  -8   2 167.530 88.2989  18
   2  -8  -2 208.644 124.438  18
  -2  -8   1 58016.3 1279.64  18
   2  -8  -1 56533.6 1731.48  18
  -2  -8   0 6063.94 429.388  18
  -2  -8   0 5694.88 468.432   1
   2  -8   0 7021.76 650.562  18
   2  -8   1 11109.0 454.360  29
   2  -8   1 12178.3 915.589  19
  -2  -8  -1 7730.50 626.220   1
  -2  -8  -1 10461.4 474.007  24
  -2  -8  -1 6985.97 484.999  18
  -2  -8  -1 10320.4 464.759  28
   2  -8   2 4638.18 590.826  19
  -2  -8  -2 3310.65 278.331  24
   2  -8   2 4006.28 294.587  27
  -2  -8  -2 3177.52 269.162  28
  -2  -8  -2 3141.84 454.578   1
  -2  -8  -2 4056.55 392.419  18
   2  -8   2 3575.86 267.872  29
   2  -8   3 18983.0 1215.70  19
   2  -8   3 17856.0 644.604  27
  -2  -8  -3 14420.1 596.154  24
  -2  -8  -3 16114.7 607.183  28
  -2  -8  -3 17078.7 1114.80   1
  -2  -8  -3 15802.2 499.860   5
  -2  -8  -3 16785.4 852.916  18
   2  -8   3 16759.3 588.110  29
   2  -8   4 19248.7 647.709  29
  -2  -8  -4 18001.6 693.494  24
   2  -8   4 19041.5 688.858  27
  -2  -8  -4 17676.0 1207.03   1
  -2  -8  -4 17583.2 656.882  28
  -2  -8  -4 18342.2 951.577  18
  -2  -8  -5 1496.04 229.827  24
  -2  -8  -5 1252.26 381.743   1
   2  -8   5 1742.99 222.526  27
   2  -8   5 1661.49 408.240  19
  -2  -8  -5 1371.39 207.032  12
  -2  -8  -5 1231.77 281.165  18
  -2  -8  -5 792.171 149.423  28
  -2  -8  -6 12032.4 648.955  24
   2  -8   6 11318.6 567.051  27
   2  -8   6 12852.0 1109.02  19
  -2  -8  -6 10679.7 829.787  18
  -2  -8  -6 11980.9 603.650  12
  -2  -8  -6 12411.9 1120.19   1
  -2  -8  -7 1236.97 414.535   1
   2  -8   7 1418.43 218.877   6
  -2  -8  -7 1441.24 268.750  24
   2  -8   7 1329.73 213.085  27
   2  -8   7 1679.87 405.741  19
  -2  -8  -7 1369.98 241.611  12
   2  -8   8 4804.09 712.017  19
  -2  -8  -8 3725.92 661.619   1
   2  -8   8 4340.97 366.574  27
  -2  -8  -8 4835.75 471.106  24
   2  -8   8 4900.29 396.298   6
  -2  -8  -9 993.616 257.903  24
   2  -8   9 479.765 146.360  27
   2  -8   9 595.924 172.327   6
   2  -8  10 414.320 126.230  27
  -2  -8 -10 513.153 231.350  24
   2  -8  10 835.052 186.870   6
   2  -8  11 1276.08 213.039   6
  -2  -8 -11 1129.34 261.887  24
  -2  -8 -12 245.823 152.524  24
   2  -8  12 27.5246 82.3805   6
  -2  -8 -12 97.5493 116.510  13
   2  -8  13 190.073 69.5313   6
  -2  -8 -13 218.722 118.071  13
  -2  -8 -13 162.557 123.503  24
   2  -7 -15 386.291 104.960   8
  -2  -7  15 387.947 115.469  23
   2  -7 -14 5.04014 85.6837   8
  -2  -7  14 130.029 70.9780   6
  -2  -7  14 152.464 123.276  23
   2  -7 -13 101.738 114.696   8
  -2  -7  13 85.4072 95.1367   6
  -2  -7  13 21.7555 114.485  23
   2  -7 -13 68.0991 119.417  24
  -2  -7  12 854.685 202.820  23
   2  -7 -12 598.211 176.066  24
   2  -7 -12 758.446 205.410   8
  -2  -7  12 876.643 178.343   6
   2  -7 -11 171.143 128.248  24
  -2  -7  11 84.4699 99.7799   6
  -2  -7  11 98.3605 130.388  23
   2  -7 -11 229.988 157.046   8
  -2  -7  10 355.901 149.123  23
  -2  -7  10 185.155 181.125  32
   2  -7 -10 309.796 180.876  18
   2  -7 -10 340.069 144.339   8
   2  -7 -10 291.013 122.072  28
  -2  -7  10 283.385 130.653   6
   2  -7 -10 327.235 142.393  24
  -2  -7  10 324.884 156.125   2
   2  -7  -9 383.460 222.142  18
   2  -7  -9 517.467 302.348   1
   2  -7  -9 376.683 143.196  28
  -2  -7   9 495.392 133.789   6
  -2  -7   9 484.407 155.387  23
   2  -7  -9 614.928 170.831   8
   2  -7  -9 140.412 92.6332  24
  -2  -7   9 375.017 205.637  32
   2  -7  -8 808.513 164.212   8
  -2  -7   8 756.202 242.921  32
  -2  -7   8 660.662 135.649   6
  -2  -7   8 691.859 119.960  27
   2  -7  -8 525.395 205.968  18
   2  -7  -8 363.879 129.079  28
  -2  -7   8 627.712 148.421  23
   2  -7  -8 231.592 204.728   1
   2  -7  -7 406.814 108.380   8
  -2  -7   7 363.868 159.781  32
  -2  -7   7 263.806 92.7747   6
   2  -7  -7 306.763 121.567  28
   2  -7  -7 183.678 161.097  18
  -2  -7   7 347.156 118.298  23
   2  -7  -7 414.392 250.194   1
  -2  -7   7 441.935 97.2783  27
   2  -7  -6 4192.34 593.033   1
  -2  -7   6 4100.38 307.493  23
   2  -7  -6 5304.11 543.635  18
  -2  -7   6 6072.82 624.534  32
  -2  -7   6 3606.97 256.314  27
  -2  -7   6 5415.72 325.094   6
   2  -7  -6 4935.64 381.261  28
   2  -7  -5 3086.30 287.283  28
  -2  -7   5 3169.53 238.096   6
   2  -7  -5 3523.37 433.125  18
  -2  -7   5 3716.63 457.183  32
  -2  -7   4 9537.32 698.931  32
   2  -7  -4 8121.64 613.027  18
  -2  -7   3 3902.77 312.774  18
  -2  -7   3 4268.50 331.668   2
   2  -7  -2 45877.7 1430.73  18
  -2  -7   2 46802.2 917.828   2
  -2  -7   2 49103.8 1453.86  32
   2  -7  -1 135520. 2503.82  18
  -2  -7   1 128154. 1737.96  18
   2  -7   0 112916. 2434.93  19
  -2  -7   0 102974. 1621.85  18
  -2  -7  -1 49960.8 1204.20  18
   2  -7   1 53286.6 1767.44  19
  -2  -7  -1 51316.1 1488.14   1
  -2  -7  -2 34125.4 1069.82  18
   2  -7   2 37172.5 1512.72  19
  -2  -7  -2 34942.2 1364.93   1
  -2  -7  -3 65965.7 1986.57   1
   2  -7   3 63590.3 1121.93  27
  -2  -7  -3 64078.0 1564.76  18
  -2  -7  -4 1196.45 181.051  24
  -2  -7  -4 1422.79 349.104   1
   2  -7   4 1506.44 186.556  27
   2  -7   4 1356.86 326.654  19
   2  -7   4 1144.32 213.751  32
  -2  -7  -4 1051.54 232.535  18
  -2  -7  -4 1855.00 201.370  28
  -2  -7  -5 5163.67 379.625  24
  -2  -7  -5 5088.45 524.757  18
   2  -7   5 5483.73 651.612  19
   2  -7   5 4954.11 313.296  29
  -2  -7  -5 5594.74 686.503   1
   2  -7   5 5105.32 351.697  27
   2  -7   5 4775.93 473.001  32
  -2  -7  -5 4428.00 318.595  28
  -2  -7  -5 4598.13 340.765  12
  -2  -7  -6 9862.87 532.515  12
  -2  -7  -6 10043.2 774.263  18
  -2  -7  -6 8435.55 441.621  28
   2  -7   6 9729.63 736.563  32
  -2  -7  -6 8275.67 872.246   1
   2  -7   6 10360.4 945.093  19
  -2  -7  -6 9375.45 545.878  24
   2  -7   6 9479.63 494.549  27
  -2  -7  -7 9197.24 550.280  12
  -2  -7  -7 9438.49 582.752  24
  -2  -7  -7 9213.67 986.776   1
   2  -7   7 8829.92 755.356  32
   2  -7   7 8606.06 486.879  27
   2  -7   7 10003.9 948.494  19
  -2  -7  -8 444.173 170.589  12
   2  -7   8 87.2787 106.300  19
   2  -7   8 264.973 110.522  27
  -2  -7  -8-17.5262 174.656   1
  -2  -7  -8 418.777 190.028  24
   2  -7   8 340.743 130.860   6
   2  -7   9 12567.2 593.586  27
  -2  -7  -9 16399.9 859.161  24
   2  -7   9 15709.1 686.501   6
   2  -7   9 10179.6 553.205  23
   2  -7  10 2951.02 307.303  23
   2  -7  10 2687.62 267.022  27
  -2  -7 -10 3649.54 446.641  24
   2  -7  10 3309.47 328.151   6
  -2  -7 -11 227.484 186.880  24
   2  -7  11 211.533 106.643  23
   2  -7  11 397.985 137.862   6
  -2  -7 -12 139.323 168.200  24
  -2  -7 -12-3.99488 143.282  13
   2  -7  12 171.698 96.9820   6
   2  -7  12 82.6692 75.4379  23
   2  -7  13 123.862 67.7016  23
  -2  -7 -13 289.427 152.742  13
  -2  -7 -13 313.471 153.884  24
   2  -7  13 155.537 75.7035   6
  -2  -6  16 530.512 106.945  23
   2  -6 -15 284.049 115.295   8
  -2  -6  15 353.346 121.985  23
   2  -6 -14 198.703 78.4136  24
   2  -6 -14 151.783 101.412  13
   2  -6 -14 260.444 121.927   8
  -2  -6  14 332.007 145.911  23
   2  -6 -13 2023.80 292.617  24
   2  -6 -13 1554.52 265.784  13
  -2  -6  13 2751.94 323.262  23
   2  -6 -13 2380.30 335.515   8
  -2  -6  13 2600.38 254.568   6
   2  -6 -12 3606.04 402.369  13
  -2  -6  12 3653.60 371.230  23
  -2  -6  12 3268.24 298.611   6
   2  -6 -12 3326.51 388.406   8
   2  -6 -12 2430.41 317.970  24
  -2  -6  11 9873.58 591.759  23
  -2  -6  11 9996.67 515.858   6
   2  -6 -11 9971.93 654.093   8
   2  -6 -11 6514.77 524.400  13
   2  -6 -11 7333.47 526.488  24
   2  -6 -10 523.561 156.625  24
  -2  -6  10 386.132 152.787  23
   2  -6 -10 415.739 125.915  13
  -2  -6  10 189.137 164.509  32
   2  -6 -10 107.707 236.659   1
  -2  -6  10 474.843 135.393   6
   2  -6 -10 536.063 182.159   8
   2  -6 -10 321.609 123.326  28
   2  -6 -10 654.430 256.391  18
   2  -6  -9 869.009 177.102  24
   2  -6  -9 819.489 184.778   8
   2  -6  -9 795.611 161.474  28
  -2  -6   9 962.097 183.481  23
  -2  -6   9 891.208 158.794   6
   2  -6  -9 950.092 277.956  18
   2  -6  -9 738.716 343.645   1
  -2  -6   9 831.083 256.183  32
  -2  -6   8 3096.65 286.311  23
   2  -6  -8 2717.88 264.100  24
   2  -6  -8 2055.60 475.160   1
   2  -6  -8 2006.65 255.712  28
  -2  -6   8 2936.85 465.698  32
   2  -6  -8 2783.22 299.973   8
  -2  -6   8 3121.35 261.030   6
   2  -6  -8 3211.91 447.922  18
  -2  -6   8 3128.77 398.325  19
   2  -6  -7 1213.15 361.806   1
   2  -6  -7 1057.58 173.189   8
   2  -6  -7 1045.78 171.761  28
  -2  -6   7 1433.35 271.987  19
  -2  -6   7 1862.27 351.469  32
   2  -6  -7 1636.19 306.644  18
  -2  -6   7 1552.66 197.419  23
  -2  -6   7 1711.70 185.275   6
   2  -6  -6 8334.76 777.941   1
  -2  -6   6 10606.6 420.457   6
  -2  -6   6 10620.6 717.524  19
   2  -6  -6 9948.43 704.622  18
  -2  -6   6 11155.4 807.817  32
   2  -6  -5 5070.55 589.511   1
   2  -6  -5 6256.78 533.595  18
  -2  -6   4 56395.1 1596.63  32
   2  -6  -4 50521.3 1418.54  18
  -2  -6   3 67169.0 1285.68   2
   2  -6  -3 64693.5 1554.66  18
  -2  -6   3 68403.7 1645.58  32
   2  -6  -2 41145.5 1246.48  18
  -2  -6   2 42693.2 1236.83  32
  -2  -6   2 39023.2 853.109  18
  -2  -6   1 30593.6 1034.54  32
  -2  -6   1 22707.0 681.101   1
  -2  -6   1 21509.9 513.908   2
   2  -6  -1 31021.1 1122.43  18
  -2  -6   1 29738.0 749.520  18
  -2  -6   0 63474.9 1362.79   1
  -2  -6   0 61456.4 1135.01  18
  -2  -6  -1 29136.7 1029.77   1
   2  -6   1 28332.6 1157.88  19
  -2  -6  -1 26279.2 808.627  18
   2  -6   1 25079.9 617.090  32
  -2  -6  -2 12633.3 746.634   1
  -2  -6  -2 12197.9 597.392  18
   2  -6   2 13176.5 835.272  19
  -2  -6  -3 37401.0 1133.43  18
   2  -6   3 38957.7 1490.36  19
  -2  -6  -3 38403.2 1409.23   1
  -2  -6  -4 23453.4 976.780  18
  -2  -6  -4 23620.4 1196.08   1
   2  -6   4 25604.8 1267.70  19
  -2  -6  -5 25994.2 753.390  12
   2  -6   5 24592.7 712.723  27
  -2  -6  -5 24302.0 767.458  24
  -2  -6  -5 27499.1 1391.85   1
   2  -6   5 21234.2 981.731  32
   2  -6   5 29397.1 1420.81  19
  -2  -6  -5 26568.0 1132.74  18
  -2  -6  -6 9322.24 520.070  24
   2  -6   6 9695.26 466.274  27
  -2  -6  -6 9705.77 508.197  12
   2  -6   6 10741.3 763.218  32
  -2  -6  -6 10227.9 900.626   1
   2  -6   6 9415.88 471.542  21
   2  -6   6 10812.2 912.094  19
  -2  -6  -7 1515.62 232.638  12
   2  -6   7 1060.14 177.209  21
  -2  -6  -7 1717.38 259.295  24
  -2  -6  -7 1604.02 390.944   1
   2  -6   7 1454.52 200.754  27
   2  -6   7 1578.97 366.371  19
   2  -6   7 2222.70 369.202  32
  -2  -6  -8 4891.30 733.949   1
   2  -6   8 5079.57 406.859  21
  -2  -6  -8 4502.63 425.727  24
  -2  -6  -8 4607.08 420.992  12
   2  -6   8 4234.49 537.006  32
   2  -6   8 4151.08 332.976  27
   2  -6   8 5102.00 676.657  19
   2  -6   9 262.590 168.491  19
   2  -6   9 576.358 211.971  32
  -2  -6  -9 408.848 195.312  24
   2  -6   9 476.599 139.904   6
  -2  -6  -9 321.741 307.277   1
   2  -6   9 602.457 146.752  27
   2  -6   9 694.428 171.399  21
   2  -6  10 8698.89 507.922   6
  -2  -6 -10 8789.07 667.016  24
   2  -6  10 8035.12 536.204  21
  -2  -6 -11 3625.64 444.542  24
   2  -6  11 3566.72 324.642   6
   2  -6  11 3383.14 331.415  23
  -2  -6 -12 361.650 215.333  13
   2  -6  12 294.130 123.750  23
  -2  -6 -12 150.636 166.478  24
   2  -6  12 369.272 118.469   6
   2  -6  13 185.203 75.7669   6
  -2  -6 -13 414.364 178.725  24
  -2  -6 -13 333.450 157.805  13
   2  -6  13 270.138 96.6096  23
  -2  -6 -14 72.6919 90.1899  24
  -2  -6 -14 87.1329 103.249  13
  -2  -5  16 427.898 118.397  23
   2  -5 -16 307.333 105.344   8
   2  -5 -15 168.207 102.075   8
   2  -5 -15 55.7156 68.3899  24
  -2  -5  15 169.351 105.091  23
  -2  -5  14 2512.35 303.987  23
   2  -5 -14 2158.16 311.781  13
   2  -5 -14 2308.26 294.428  24
   2  -5 -14 2219.49 314.109   8
   2  -5 -13 757.273 214.486  13
   2  -5 -13 1080.76 232.699  24
   2  -5 -13 942.546 231.451   8
  -2  -5  13 710.051 195.608  23
  -2  -5  13 569.955 123.433   6
  -2  -5  12 6691.89 494.753  23
   2  -5 -12 6538.79 566.283  13
   2  -5 -12 6754.10 525.741  24
  -2  -5  12 6222.84 391.055   6
   2  -5 -12 6837.24 564.450   8
   2  -5 -11 2222.90 334.754   8
   2  -5 -11 2065.27 290.224  24
   2  -5 -11 2262.01 340.302  13
  -2  -5  11 1933.37 226.728   6
  -2  -5  11 2013.19 276.219  23
  -2  -5  11 2493.41 456.005  32
   2  -5 -11 1524.94 418.660   1
  -2  -5  10 16424.9 695.546  23
   2  -5 -10 11209.0 668.697  13
   2  -5 -10 15566.2 771.455   8
   2  -5 -10 17122.4 1092.19  18
   2  -5 -10 11894.5 626.725  24
  -2  -5  10 14797.8 1085.81  32
   2  -5 -10 12380.4 1099.76   1
  -2  -5  10 16218.0 610.907   6
  -2  -5   9 24484.2 1324.75  32
  -2  -5   9 23587.9 702.919   6
   2  -5  -9 19919.8 1312.14   1
  -2  -5   9 22543.6 765.444  23
   2  -5  -9 15814.4 664.123  24
   2  -5  -9 24939.1 924.493   8
   2  -5  -9 25071.5 1244.77  18
   2  -5  -9 14875.1 642.396  28
  -2  -5   8 15091.6 537.332   6
   2  -5  -8 16407.3 950.591  18
  -2  -5   8 14537.4 581.618  23
  -2  -5   8 15466.1 996.782  32
   2  -5  -8 15232.9 674.731   8
   2  -5  -8 12545.1 1002.62   1
  -2  -5   8 14536.3 807.109  19
  -2  -5   8 15028.5 797.665  30
   2  -5  -8 13312.5 555.439  24
  -2  -5   7 2640.22 234.711  23
  -2  -5   7 2783.38 217.927   6
  -2  -5   7 2574.58 391.950  32
  -2  -5   7 2108.26 284.882  30
  -2  -5   7 2403.32 325.813  19
   2  -5  -7 2652.68 370.262  18
   2  -5  -7 2526.48 447.590   1
   2  -5  -6 3382.25 486.532   1
  -2  -5   6 3376.04 379.234  19
  -2  -5   6 3278.92 319.802  30
   2  -5  -6 3489.37 394.088  18
  -2  -5   6 4372.97 487.387  32
   2  -5  -5 3415.44 453.255   1
   2  -5  -5 3397.27 369.565  18
  -2  -5   5 4475.42 415.924  19
  -2  -5   5 2699.80 259.102  30
  -2  -5   5 4460.79 455.816  32
   2  -5  -4 11025.8 604.292  18
  -2  -5   4 12347.0 699.607  32
   2  -5  -4 10097.6 698.303   1
  -2  -5   3 27024.8 967.339  32
   2  -5  -3 26702.3 922.530  18
  -2  -5   3 26580.5 788.683   2
  -2  -5   2 105563. 1233.96  18
  -2  -5   2 116383. 1911.01  32
  -2  -5   2 110494. 1411.29   2
   2  -5  -2 114849. 1909.54  18
  -2  -5   1 46187.7 781.360   2
  -2  -5   1 48954.6 840.889  18
   2  -5  -1 55057.0 1318.60  19
  -2  -5   1 54210.6 960.058   1
  -2  -5   1 51492.6 1232.42  32
  -2  -5   0 239798. 2012.79  18
   2  -5   0 249385. 2959.34  19
  -2  -5   0 263899. 2483.55   1
   2  -5   1 33526.6 1135.74  19
  -2  -5  -1 33306.4 990.455   1
  -2  -5  -1 31642.5 809.236  18
  -2  -5  -2 104474. 1628.95  18
   2  -5   2 108825. 2186.97  19
  -2  -5  -2 107801. 1969.13   1
   2  -5   2 104387. 1471.08  32
  -2  -5  -3 27916.8 1105.58   1
   2  -5   3 31515.6 1230.78  19
   2  -5   3 29572.0 907.548  32
  -2  -5  -3 30533.3 966.523  18
  -2  -5  -4 29801.8 1235.98   1
  -2  -5  -4 27553.9 1025.47  18
   2  -5   4 27478.5 985.399  32
   2  -5   5 700.276 173.189  32
  -2  -5  -5 537.473 224.565   1
  -2  -5  -5 569.971 128.248  24
   2  -5   5 472.633 100.366  21
  -2  -5  -5 564.933 188.531  18
   2  -5   5 841.595 241.150  19
  -2  -5  -6 8703.99 477.558  24
   2  -5   6 8416.54 660.795  32
  -2  -5  -6 9167.84 475.828  12
   2  -5   6 9731.17 807.130  19
  -2  -5  -6 9515.54 829.840   1
   2  -5   6 8243.87 441.158  21
   2  -5   6 8049.08 401.498  27
   2  -5   7 3775.09 291.210  27
   2  -5   7 4692.62 603.884  19
  -2  -5  -7 4230.65 374.789  24
  -2  -5  -7 4168.70 338.065  26
  -2  -5  -7 3937.63 278.630  17
  -2  -5  -7 4607.54 375.423  12
  -2  -5  -7 4813.91 656.793   1
  -2  -5  -7 3641.89 312.382   8
   2  -5   7 3876.33 337.823  21
   2  -5   7 4118.07 501.996  32
  -2  -5  -8 2481.16 239.069  17
  -2  -5  -8 1805.50 247.423  26
   2  -5   8 2209.74 228.949  27
   2  -5   8 2273.88 281.584  21
  -2  -5  -8 2429.57 525.280   1
   2  -5   8 1879.50 383.781  32
  -2  -5  -8 1624.26 230.507   8
   2  -5   8 2244.72 434.584  19
  -2  -5  -8 2321.95 313.388  24
  -2  -5  -9 524.834 150.952   8
   2  -5   9 1025.18 278.591  32
   2  -5   9 1035.00 204.063  21
  -2  -5  -9 471.943 152.626  26
   2  -5   9 723.102 148.523  27
  -2  -5  -9 920.094 329.501   1
   2  -5   9 817.504 275.537  19
  -2  -5  -9 721.012 219.533  24
  -2  -5 -10 5854.64 549.433  24
   2  -5  10 4050.13 400.574  21
   2  -5  10 5701.36 408.089   6
  -2  -5 -10 3806.35 400.090   8
  -2  -5 -11 2505.42 382.243  24
   2  -5  11 2436.77 269.493   6
   2  -5  11 1949.58 278.792  21
  -2  -5 -11 1684.39 272.207   8
  -2  -5 -12 960.269 280.095  13
  -2  -5 -12 845.886 256.186  24
  -2  -5 -12 744.327 182.115   8
   2  -5  12 752.482 150.658   6
   2  -5  12 451.149 133.903  21
  -2  -5 -13 202.945 97.3721   8
  -2  -5 -13 256.629 166.559  24
  -2  -5 -13-15.1850 151.659  13
   2  -5  13 70.7057 82.4454  23
  -2  -5 -14 130.963 110.185  24
   2  -5  14 386.297 94.7437  23
  -2  -5 -14 318.041 136.466  13
   2  -4 -16 106.962 87.1860   8
  -2  -4  16 160.185 98.3498  23
   2  -4 -15 165.664 116.012   8
  -2  -4  15 261.905 117.169  23
   2  -4 -15-80.3014 108.411  24
   2  -4 -14 157.770 150.983  13
   2  -4 -14 192.957 125.314  24
  -2  -4  14 30.9845 105.268  23
   2  -4 -14 44.1076 125.892   8
  -2  -4  13 1418.38 248.692  23
   2  -4 -13 1093.57 243.717   8
   2  -4 -13 1300.00 248.984  24
   2  -4 -13 1156.00 260.759  13
   2  -4 -12 1257.44 278.690  13
  -2  -4  12 965.407 219.580  23
   2  -4 -12 879.572 234.459   8
   2  -4 -12 1212.90 256.594  24
  -2  -4  12 937.020 151.841   6
   2  -4 -11 6382.29 811.036   1
   2  -4 -11 8239.50 619.915  13
   2  -4 -11 8470.54 556.015  24
  -2  -4  11 6966.86 665.058  30
  -2  -4  11 7506.36 403.967   6
  -2  -4  11 7882.51 501.787  23
  -2  -4  11 7703.40 800.390  32
   2  -4 -11 6563.15 453.464   9
   2  -4 -11 7841.01 572.311   8
   2  -4 -10 7395.72 454.975   9
  -2  -4  10 7813.52 397.237   6
  -2  -4  10 7206.90 736.808  32
   2  -4 -10 5653.58 713.917   1
  -2  -4  10 7680.03 461.079  23
   2  -4 -10 7857.84 565.779  13
   2  -4 -10 7886.73 554.313   8
   2  -4 -10 7338.72 491.486  24
   2  -4  -9 9680.49 882.103   1
  -2  -4   9 10454.0 724.394  30
  -2  -4   9 10378.7 440.879   6
   2  -4  -9 10560.9 798.256  18
   2  -4  -9 7426.88 454.390  24
   2  -4  -9 8832.22 464.419   9
   2  -4  -9 11343.9 613.224   8
   2  -4  -9 6726.35 480.860  13
  -2  -4   9 10250.2 825.763  32
  -2  -4   8 7180.74 345.056   6
   2  -4  -8 9857.01 705.410  18
   2  -4  -8 9166.14 808.836   1
   2  -4  -8 6305.29 367.684   9
  -2  -4   8 9272.85 599.737  19
  -2  -4   8 9824.43 766.379  32
  -2  -4   8 9875.53 666.422  30
   2  -4  -8 10916.1 556.165   8
   2  -4  -7 8743.05 625.673  18
  -2  -4   7 7184.07 516.714  30
   2  -4  -7 7613.76 706.598   1
  -2  -4   7 6620.96 496.258  19
   2  -4  -7 7987.28 341.185  22
  -2  -4   7 8787.57 676.660  32
   2  -4  -6 20889.0 1089.72   1
  -2  -4   6 21498.9 824.150  30
  -2  -4   6 24381.2 1053.14  32
   2  -4  -6 23679.1 945.456  18
  -2  -4   6 21988.1 840.689  19
   2  -4  -5 35012.9 1071.08  18
  -2  -4   5 34363.4 1018.84  19
  -2  -4   5 35276.8 1190.80  32
  -2  -4   5 32853.7 921.004  30
   2  -4  -4 27336.8 1059.70   1
  -2  -4   4 26272.2 738.351  30
  -2  -4   4 30487.0 932.749  19
   2  -4  -4 29116.0 922.015  18
  -2  -4   4 30259.8 1024.37  32
   2  -4  -3 56750.4 1215.53  18
  -2  -4   3 62060.4 1151.88   2
  -2  -4   3 65055.8 1395.74  32
  -2  -4   3 58074.9 978.267  30
  -2  -4   2 83653.3 1094.45  30
  -2  -4   2 82816.1 1481.14  32
  -2  -4   2 75082.3 869.089  18
   2  -4  -2 80109.9 1433.27  18
  -2  -4   2 78003.8 1165.03   2
  -2  -4   1 246301. 1790.61   2
  -2  -4   1 253746. 2526.46  32
  -2  -4   1 254432. 1802.31  30
  -2  -4   1 245589. 1816.42   1
   2  -4  -1 256268. 2488.09  19
  -2  -4   1 243295. 1564.00  18
  -2  -4   0 19756.4 451.657   2
  -2  -4   0 16711.4 506.435  30
   2  -4   0 18659.4 716.001  19
  -2  -4   0 17857.8 485.278  18
  -2  -4  -1 115230. 1415.80  18
  -2  -4  -1 112789. 1633.38   1
   2  -4   1 112339. 1197.52  32
   2  -4   2 102669. 1404.35  32
  -2  -4  -2 103682. 1510.32  18
   2  -4   2 106194. 1924.09  19
  -2  -4  -2 100920. 1711.99   1
  -2  -4  -3 20843.1 863.246   1
   2  -4   3 20486.7 724.051  32
   2  -4   3 20653.6 920.980  19
  -2  -4  -3 20785.2 771.721  18
  -2  -4  -4 2912.02 381.499   1
   2  -4   4 2414.91 284.388  32
  -2  -4  -4 2638.09 191.932  33
  -2  -4  -4 2622.51 320.684  18
  -2  -4  -5 24042.6 1124.86   1
  -2  -4  -5 23933.5 614.934  33
   2  -4   5 24108.3 990.180  32
   2  -4   5 23864.7 1132.37  19
  -2  -4  -6 6863.56 413.106  24
   2  -4   6 7177.04 658.795  19
  -2  -4  -6 7779.54 723.486   1
  -2  -4  -6 7088.62 360.897  33
   2  -4   6 6976.20 584.614  32
  -2  -4  -6 6962.99 396.418  12
   2  -4   7 11068.9 859.819  19
   2  -4   7 9462.71 741.064  32
  -2  -4  -7 9270.46 505.696   8
  -2  -4  -7 10104.9 470.012  33
  -2  -4  -7 9582.23 514.479  12
  -2  -4  -7 9803.33 857.003   1
  -2  -4  -7 6542.20 419.898  26
   2  -4   7 8863.12 418.700  27
  -2  -4  -7 7519.13 385.834  17
  -2  -4  -7 9712.16 542.665  24
  -2  -4  -8 9773.02 935.811   1
  -2  -4  -8 9332.65 579.033  24
   2  -4   8 8400.53 751.285  32
  -2  -4  -8 9195.76 542.235  26
   2  -4   8 7970.79 416.479  27
   2  -4   8 10219.2 864.484  19
  -2  -4  -8 9558.02 485.341  33
  -2  -4  -8 6866.69 482.564   8
  -2  -4  -8 6625.90 397.785  17
   2  -4   9 11246.8 502.591  27
  -2  -4  -9 14010.8 721.087   8
  -2  -4  -9 14653.4 1192.54   1
   2  -4   9 13644.4 1036.45  19
   2  -4   9 12631.4 984.106  32
  -2  -4  -9 12545.0 682.792  26
  -2  -4  -9 13931.8 757.761  24
   2  -4  10 1511.98 358.595  32
  -2  -4 -10 2412.87 371.488  24
   2  -4  10 2345.78 437.610  19
   2  -4  10 2242.82 310.665  21
  -2  -4 -10 2290.07 547.058   1
   2  -4  10 2682.03 273.521   6
  -2  -4 -10 2462.56 331.298   8
  -2  -4 -10 1821.90 309.394  26
  -2  -4 -10 1572.52 226.795  17
   2  -4  11 9184.89 608.284  21
  -2  -4 -11 10282.3 665.075   8
  -2  -4 -11 10659.3 745.445  24
   2  -4  11 9307.61 489.941   6
  -2  -4 -11 8369.11 499.658  17
  -2  -4 -12 1498.58 327.433  13
  -2  -4 -12 834.191 231.894   8
  -2  -4 -12 1269.94 304.308  24
   2  -4  12 874.225 153.407   6
   2  -4  12 1131.65 216.616  21
  -2  -4 -13 706.269 226.215  13
   2  -4  13 415.140 121.130  21
  -2  -4 -13 617.371 178.696   8
  -2  -4 -13 580.152 213.809  24
  -2  -4 -14 313.070 134.373  13
  -2  -4 -14 129.004 73.5016   8
  -2  -4 -14 229.082 137.407  24
   2  -4  14 421.716 115.963  23
   2  -3 -16 57.0708 86.8702   8
  -2  -3  16 238.212 108.031  23
   2  -3 -15 965.384 217.198   8
   2  -3 -15 1146.67 216.467  24
  -2  -3  15 1287.57 215.500  23
   2  -3 -14 521.444 193.790  13
  -2  -3  14 941.187 212.091  23
   2  -3 -14 835.315 214.452  24
   2  -3 -14 778.201 207.384   8
  -2  -3  13 252.702 145.701  23
   2  -3 -13 239.015 152.624  24
   2  -3 -13 407.188 191.881  13
   2  -3 -13 487.621 201.708   8
   2  -3 -12 761.623 221.803  24
   2  -3 -12 879.709 242.380  13
  -2  -3  12 618.458 209.857  30
   2  -3 -12 553.054 194.737   8
  -2  -3  12 624.655 174.133  23
   2  -3 -12 354.040 116.796   9
  -2  -3  11 153.004 167.329  32
   2  -3 -11 383.075 180.993  13
   2  -3 -11 172.194 141.236   8
  -2  -3  11 236.038 135.770  30
   2  -3 -11 590.301 148.828   9
   2  -3 -11 163.680 133.219  24
   2  -3 -11 311.031 262.581   1
  -2  -3  10 7275.15 671.619  30
   2  -3 -10 7091.02 445.684   9
   2  -3 -10 7349.05 487.848  24
   2  -3 -10 7211.98 546.452  13
  -2  -3  10 6367.80 334.286   6
   2  -3 -10 6505.33 733.153   1
   2  -3 -10 7177.82 523.353   8
  -2  -3  10 7406.33 726.844  32
   2  -3  -9 885.999 182.317  13
   2  -3  -9 620.829 140.648  24
   2  -3  -9 595.065 125.218   9
  -2  -3   9 808.541 243.083  32
   2  -3  -9 790.482 142.539  22
  -2  -3   9 780.219 210.093  30
  -2  -3   9 656.548 104.041   6
   2  -3  -9 782.320 275.861   1
   2  -3  -9 719.517 247.450  18
   2  -3  -9 858.489 184.856   8
  -2  -3   8 13926.7 867.950  32
   2  -3  -8 14348.8 817.263  18
   2  -3  -8 12685.4 484.314  22
  -2  -3   8 13037.1 774.268  30
  -2  -3   8 11130.1 601.512  19
   2  -3  -8 13911.2 605.299   8
   2  -3  -8 12988.8 926.496   1
   2  -3  -7 16205.1 957.569   1
   2  -3  -7 15755.3 476.709  22
  -2  -3   7 14985.9 657.605  19
  -2  -3   7 17873.3 922.083  32
  -2  -3   7 16439.9 797.975  30
   2  -3  -7 17030.8 828.210  18
   2  -3  -6 48634.8 1266.26  18
  -2  -3   6 44384.5 1193.33  30
  -2  -3   6 47224.9 1393.85  32
   2  -3  -6 41463.0 1412.64   1
  -2  -3   6 42179.9 1049.36  19
  -2  -3   5 27228.3 982.765  32
  -2  -3   5 23642.2 749.497  19
   2  -3  -5 26986.5 867.219  18
  -2  -3   5 24551.0 811.576  30
   2  -3  -5 24532.2 1016.93   1
   2  -3  -4 204383. 2211.21  18
   2  -3  -4 195004. 2625.72   1
  -2  -3   4 216806. 2552.76  32
  -2  -3   4 215497. 2106.15  19
  -2  -3   4 199498. 2073.21  30
  -2  -3   3 27703.1 847.513  32
   2  -3  -3 25765.6 737.267  18
  -2  -3   3 26757.3 670.838  30
  -2  -3   3 26932.7 739.173   2
  -2  -3   2 336390. 2212.41  30
  -2  -3   2 318353. 2284.72   2
   2  -3  -2 327042. 2645.69  18
  -2  -3   2 342185. 2757.61  32
  -2  -3   2 314520. 1337.03  18
  -2  -3   1 828877. 2217.48  18
  -2  -3   1 825097. 3121.59   1
   2  -3   0 765556. 4004.55  19
  -2  -3   0 756065. 3490.07   1
  -2  -3   0 778858. 3448.78  30
  -2  -3   0 765287. 2766.26  18
  -2  -3   0 776651. 2969.63   2
   2  -3   0 769395. 2175.57  32
  -2  -3  -1 380396. 2097.49   2
   2  -3   1 382329. 2185.58  32
  -2  -3  -1 375549. 2369.88  18
  -2  -3  -1 367836. 2639.81  30
  -2  -3  -1 375251. 2768.45   1
   2  -3   1 392013. 3111.99  19
  -2  -3  -2 17572.4 665.954   1
   2  -3   2 19796.9 599.091  32
   2  -3   2 20357.9 778.145  19
  -2  -3  -2 18249.7 610.835  18
  -2  -3  -3 224244. 2422.48  18
   2  -3   3 229745. 2378.34  32
  -2  -3  -3 223382. 2637.42   1
   2  -3   4 93579.2 1974.59  19
   2  -3   4 89284.6 1666.55  32
  -2  -3  -4 92448.7 1837.96   1
   2  -3   5 184902. 2990.46  19
   2  -3   5 167998. 2552.50  32
  -2  -3  -5 172311. 1585.94  33
  -2  -3  -5 181924. 2871.20   1
  -2  -3  -6 3426.35 286.440  24
  -2  -3  -6 3213.32 261.177  12
   2  -3   6 3031.04 387.026  32
  -2  -3  -6 3779.62 471.205   1
  -2  -3  -6 3187.81 237.721  33
   2  -3   6 3343.45 438.463  19
  -2  -3  -7 10687.0 527.241  12
  -2  -3  -7 9393.48 498.489  25
  -2  -3  -7 11814.6 889.803   1
  -2  -3  -7 8380.69 484.197   8
  -2  -3  -7 11186.1 479.748  33
   2  -3   7 9352.69 406.622  27
   2  -3   7 10654.4 771.644  32
   2  -3   7 12119.5 874.911  19
  -2  -3  -7 8826.89 512.695  24
  -2  -3  -7 7423.19 386.550  17
  -2  -3  -7 7892.74 454.807  26
  -2  -3  -8 9300.27 462.827  33
  -2  -3  -8 8727.40 529.473  26
  -2  -3  -8 9808.15 571.436   8
   2  -3   8 9028.03 793.163  19
   2  -3   8 8230.07 735.611  32
  -2  -3  -8 9243.02 861.579   1
   2  -3   8 7449.47 380.392  27
  -2  -3  -8 8825.70 558.987  24
  -2  -3  -8 8512.56 457.403  17
   2  -3   9 3163.16 491.887  32
  -2  -3  -9 3517.64 393.068  24
  -2  -3  -9 3721.59 379.384  26
  -2  -3  -9 3661.17 314.802  33
   2  -3   9 4107.80 545.505  19
  -2  -3  -9 3612.11 387.390   8
  -2  -3  -9 2588.19 522.152   1
  -2  -3  -9 3283.90 317.042  17
  -2  -3 -10 14322.1 769.025  26
  -2  -3 -10 14462.3 629.716  33
  -2  -3 -10 14794.8 829.289  24
  -2  -3 -10 12744.9 633.948  17
   2  -3  10 12379.1 1008.13  32
   2  -3  10 14149.0 1045.33  19
  -2  -3 -10 14065.5 782.764   8
  -2  -3 -11 22317.4 1033.35  24
  -2  -3 -11 17526.6 748.373  17
  -2  -3 -11 20767.1 973.575   8
   2  -3  11 19485.9 895.642  21
   2  -3  11 17708.0 641.966   6
  -2  -3 -11 17579.4 895.967  26
  -2  -3 -12 6933.48 556.120   8
   2  -3  12 6107.25 495.680  21
  -2  -3 -12 8003.38 641.849  24
  -2  -3 -12 7188.54 652.677  13
  -2  -3 -13 1403.90 279.180  24
  -2  -3 -13 915.758 211.696   8
  -2  -3 -13 1213.45 286.580  13
   2  -3  13 1216.62 210.779  21
   2  -3  14 79.5636 73.2028  21
  -2  -3 -14 217.431 105.841  13
   2  -3  14 315.915 113.317  23
  -2  -3 -14 191.905 125.285  24
  -2  -3 -14 312.530 124.312   8
  -2  -3 -15-49.9297 78.5135  24
  -2  -3 -15-53.5863 87.8139  13
  -2  -2  16 390.181 116.360  23
   2  -2 -16 149.990 111.090   8
   2  -2 -15-97.4670 118.875   8
  -2  -2  15 9.36870 107.733  23
   2  -2 -15 61.8040 120.459  24
   2  -2 -14 898.767 249.294  13
   2  -2 -14 1055.44 233.435  24
   2  -2 -14 946.263 181.578   9
  -2  -2  14 1080.66 219.193  23
   2  -2 -14 745.312 216.447   8
   2  -2 -13 4040.01 436.475   8
   2  -2 -13 4284.60 484.754  13
  -2  -2  13 4071.01 392.454  23
   2  -2 -13 3087.50 328.890   9
   2  -2 -13 3644.70 407.639  24
   2  -2 -12 1345.54 229.035   9
  -2  -2  12 880.882 273.876  30
   2  -2 -12 1409.01 287.812  13
  -2  -2  12 1724.10 385.062   2
  -2  -2  12 1420.75 338.766  32
   2  -2 -12 1064.37 234.473   8
   2  -2 -12 1590.34 288.050  24
   2  -2 -11-100.422 196.486   1
  -2  -2  11 662.212 227.910  32
   2  -2 -11 700.711 221.479  13
   2  -2 -11 629.658 152.382   9
   2  -2 -11 675.811 215.072  24
   2  -2 -11 439.659 138.491  22
   2  -2 -11 622.728 185.242   8
  -2  -2  11 303.471 185.202  30
   2  -2 -10 12993.6 728.088  13
   2  -2 -10 12497.7 641.145  24
   2  -2 -10 12245.3 588.630   9
  -2  -2  10 11974.3 884.034  30
   2  -2 -10 12318.0 565.905  22
  -2  -2  10 13012.9 944.792  32
   2  -2 -10 9878.32 880.354   1
   2  -2 -10 12131.7 638.751   8
   2  -2  -9 8600.53 755.703   1
   2  -2  -9 9842.07 580.965  13
   2  -2  -9 9034.36 465.256   9
  -2  -2   9 9478.12 747.137  32
   2  -2  -9 9367.11 455.457  22
  -2  -2   9 9189.52 723.815  30
   2  -2  -9 8769.21 513.715   8
   2  -2  -8 22389.1 1141.57   1
   2  -2  -8 23371.3 658.910  22
  -2  -2   8 25179.5 1122.00  32
   2  -2  -8 25613.1 1054.33  18
  -2  -2   8 24133.0 1074.04  30
   2  -2  -8 24031.6 781.089   8
   2  -2  -7 11256.9 758.770   1
  -2  -2   7 10554.8 500.132  19
   2  -2  -7 12653.9 431.705  22
  -2  -2   7 13540.4 765.034  32
  -2  -2   7 13445.8 737.933  30
   2  -2  -7 12723.3 671.094  18
   2  -2  -6 29773.2 1135.97   1
  -2  -2   6 29046.0 762.799  19
  -2  -2   6 32785.9 1045.09  30
   2  -2  -6 34158.8 1007.29  18
  -2  -2   6 33120.9 1096.87  32
   2  -2  -5 6931.99 514.122   1
   2  -2  -5 8309.95 454.342  18
  -2  -2   5 7600.04 491.033  32
  -2  -2   5 7794.23 460.705  30
  -2  -2   5 7557.41 361.675  19
  -2  -2   4 49804.6 860.235  19
   2  -2  -4 51007.5 1247.40   1
  -2  -2   4 51105.4 1057.08  30
  -2  -2   4 54455.3 1190.83  32
   2  -2  -4 51292.7 1015.85  18
  -2  -2   3 53650.0 1006.84   2
   2  -2  -3 52448.6 939.486  18
  -2  -2   3 51228.0 953.572  30
  -2  -2   2 755898. 3321.91  30
  -2  -2   2 761367. 3410.90   2
  -2  -2   2 773799. 3781.22  32
   2  -2  -2 767519. 3488.46  18
  -2  -2   1 47531.7 371.897  18
   2  -2  -1 45483.2 744.507  19
  -2  -2   1 47364.3 906.213  32
  -2  -2   1 46190.5 770.243   2
  -2  -2   0 524993. 2478.48   2
   2  -2   0 511183. 2880.73  19
  -2  -2   0 523371. 2794.37  30
  -2  -2   0 502883. 2057.52  18
  -2  -2  -1 223879. 1767.12  18
  -2  -2  -1 230882. 2060.77  30
  -2  -2  -1 226671. 1748.89   2
   2  -2   1 234604. 2229.82  19
  -2  -2  -1 233680. 2104.93   1
  -2  -2  -2 65178.3 1210.08   1
   2  -2   2 65857.9 1321.61  19
  -2  -2  -3 130949. 1887.57   1
   2  -2   3 134289. 1789.07  32
   2  -2   4 128776. 1997.13  32
   2  -2   4 135318. 2299.69  19
  -2  -2  -4 129138. 2056.51   1
   2  -2   5 53836.0 1429.04  32
   2  -2   5 58731.4 1648.41  19
  -2  -2  -5 56649.3 1491.47   1
  -2  -2  -5 52787.5 855.228  33
  -2  -2  -6 27469.3 680.405  33
   2  -2   6 29949.0 1265.42  19
  -2  -2  -6 28656.1 1179.71   1
   2  -2   6 27721.7 1133.53  32
  -2  -2  -7 1113.80 184.045  25
  -2  -2  -7 1751.05 234.128  24
   2  -2   7 1913.79 338.929  32
  -2  -2  -7 1841.04 359.893   1
  -2  -2  -7 2002.50 235.295  26
  -2  -2  -7 1652.87 190.612  33
   2  -2   7 2190.62 367.782  19
  -2  -2  -7 1282.93 170.243  17
  -2  -2  -8 7719.07 519.496  24
  -2  -2  -8 8510.03 448.635  33
   2  -2   8 9192.39 784.934  19
  -2  -2  -8 8157.54 779.277   1
  -2  -2  -8 8884.05 548.259   8
  -2  -2  -8 8146.20 511.307  26
  -2  -2  -8 7853.02 446.834  17
   2  -2   8 8562.37 747.484  32
   2  -2   9 8364.54 790.334  32
   2  -2   9 8452.74 787.736  19
  -2  -2  -9 8687.88 587.025   8
  -2  -2  -9 7638.66 818.010   1
  -2  -2  -9 8945.69 568.663  26
  -2  -2  -9 8733.13 597.713  24
  -2  -2  -9 8997.82 516.379  17
  -2  -2  -9 9928.15 504.337  33
   2  -2  10 3014.29 489.692  19
  -2  -2 -10 3055.62 386.212  26
  -2  -2 -10 3073.24 407.259  24
  -2  -2 -10 3051.29 300.073  33
  -2  -2 -10 2985.40 387.508   8
  -2  -2 -10 3278.90 569.319   1
  -2  -2 -10 2928.77 326.410  17
   2  -2  10 3211.75 510.181  32
  -2  -2 -11 4253.04 475.260   8
  -2  -2 -11 5058.15 513.774  24
  -2  -2 -11 4570.52 531.545  13
  -2  -2 -11 4672.66 473.289  26
  -2  -2 -11 4039.41 343.883  33
  -2  -2 -11 3731.46 372.509  17
   2  -2  12 1074.66 224.828  21
  -2  -2 -12 1333.90 310.816  24
  -2  -2 -12 985.862 279.663  13
  -2  -2 -12 1146.53 259.366  26
  -2  -2 -12 1188.05 269.820   8
  -2  -2 -13 1407.65 282.637  24
  -2  -2 -13 1095.64 268.261  13
   2  -2  13 757.466 178.013  21
  -2  -2 -13 1131.84 234.086   8
  -2  -2 -14 495.034 188.221  24
  -2  -2 -14 408.313 138.295   8
   2  -2  14 602.967 147.014  21
  -2  -2 -14 473.515 185.001  13
  -2  -2 -15 76.5663 84.0565  24
   2  -2  15 210.346 84.7212  23
  -2  -1  16 173.127 97.1259  23
   2  -1 -16-54.8641 99.4429   8
  -2  -1  15 756.119 185.729  23
   2  -1 -15 591.099 194.949  24
   2  -1 -15 430.862 168.785   8
   2  -1 -14 2231.12 358.427  13
   2  -1 -14 2015.21 315.359   8
   2  -1 -14 2045.39 313.228  24
   2  -1 -14 1965.88 268.376   9
  -2  -1  14 1888.67 271.904  23
   2  -1 -13 2520.87 303.781   9
   2  -1 -13 2161.31 330.001   8
   2  -1 -13 2614.47 369.587  24
   2  -1 -13 2390.11 379.719  13
   2  -1 -12 4916.60 520.436  13
   2  -1 -12 4723.52 452.349  24
  -2  -1  12 3297.89 517.148  32
   2  -1 -12 4162.38 421.625   8
   2  -1 -12 3971.71 372.286  22
   2  -1 -12 5020.49 421.797   9
  -2  -1  12 4361.02 606.881  30
  -2  -1  12 3183.19 499.413   2
  -2  -1  11 2583.86 427.770   2
   2  -1 -11 1929.29 295.892  24
   2  -1 -11 2366.92 352.564  13
   2  -1 -11 2257.79 277.001  22
   2  -1 -11 2281.46 301.694   8
   2  -1 -11 2315.25 285.120   9
  -2  -1  11 2562.16 433.165  32
  -2  -1  11 2014.28 400.977  30
   2  -1 -10 9910.33 634.099  13
  -2  -1  10 8850.34 759.433  32
   2  -1 -10 8855.03 480.108  22
   2  -1 -10 8884.01 425.009  16
  -2  -1  10 8252.87 751.968  30
   2  -1 -10 8519.86 530.148   8
   2  -1 -10 7593.12 718.342   1
   2  -1 -10 9289.10 517.111   9
   2  -1 -10 9135.46 556.985  24
   2  -1  -9 669.113 147.168   8
   2  -1  -9 800.160 252.534   1
   2  -1  -9 759.017 138.955   9
   2  -1  -9 726.379 161.668  24
  -2  -1   9 565.018 175.354  32
  -2  -1   9 964.774 245.182  30
   2  -1  -9 816.388 140.571  22
   2  -1  -9 1161.76 214.571  13
   2  -1  -9 600.889 105.715  16
   2  -1  -8 33173.6 1304.64   1
  -2  -1   8 36842.2 1318.77  32
   2  -1  -8 36035.6 812.411  22
  -2  -1   8 35384.6 1320.70  30
   2  -1  -7 23497.5 585.614  22
  -2  -1   7 24542.4 990.123  32
   2  -1  -7 23697.2 895.906  18
  -2  -1   7 23429.7 982.654  30
  -2  -1   6 27214.1 954.316  32
   2  -1  -6 28703.6 869.399  18
  -2  -1   6 27090.6 966.723  30
   2  -1  -6 26213.8 999.316   1
   2  -1  -5 24875.9 884.752   1
  -2  -1   5 25362.7 845.839  30
   2  -1  -5 26173.2 742.892  18
  -2  -1   5 24716.6 825.949  32
   2  -1  -4 101814. 1294.29  18
  -2  -1   4 102994. 1527.39  32
  -2  -1   4 100779. 1516.28  30
  -2  -1   3 732317. 3635.94   2
   2  -1  -3 737547. 3650.10  20
   2  -1  -3 749835. 3070.49  18
  -2  -1   3 721405. 3643.16  30
  -2  -1   3 749181. 3728.82  32
   2  -1  -2 64659.2 1000.61  20
   2  -1  -2 62249.2 813.030  18
  -2  -1   2 63482.7 991.099  32
  -2  -1   2 60738.6 953.366  30
  -2  -1   2 62391.1 954.227   2
  -2  -1   1 78175.0 1048.93  30
  -2  -1   1 75973.4 975.822   2
   2  -1  -1 75255.3 1008.53  20
   2  -1  -1 76203.7 808.263  19
  -2  -1   0 138763. 1435.45  30
  -2  -1   0 140040. 1311.66   2
   2  -1   0 141114. 1413.33  19
   2  -1   0 136462. 1252.79  20
  -2  -1  -1 170085. 1739.31  30
  -2  -1  -1 169988. 1557.05   2
   2  -1   2 88764.2 1519.64  19
  -2  -1  -2 92730.1 1418.06   1
  -2  -1  -3 89854.4 1505.93   1
   2  -1   3 87476.6 1681.23  19
   2  -1   4 71246.4 1685.86  19
  -2  -1  -4 73043.4 1463.83   1
   2  -1   5 20125.3 881.562  32
  -2  -1  -5 19391.6 830.652   1
   2  -1   5 22199.1 1009.27  19
   2  -1   6 14183.8 817.066  32
  -2  -1  -6 13881.4 490.232  33
  -2  -1  -6 15072.9 811.528   1
   2  -1   6 15778.6 911.610  19
  -2  -1  -7 3890.61 285.536  33
  -2  -1  -7 3513.17 274.180  17
   2  -1   7 4862.48 541.751  19
  -2  -1  -7 3806.87 483.525   1
   2  -1   7 4354.40 494.658  32
  -2  -1  -7 2911.89 298.037  24
  -2  -1  -7 3726.21 317.195  25
  -2  -1  -7 3120.56 287.045  26
  -2  -1  -8 703.306 168.352  26
  -2  -1  -8 538.406 170.384  24
  -2  -1  -8 353.056 191.718   1
  -2  -1  -8 592.616 134.107  17
   2  -1   8 678.322 231.772  19
   2  -1   8 849.457 242.919  32
  -2  -1  -8 738.963 137.582  33
  -2  -1  -9 5125.71 368.726  33
  -2  -1  -9 4493.42 426.298  26
  -2  -1  -9 4306.40 596.206   1
  -2  -1  -9 4850.45 387.782  17
  -2  -1  -9 4945.97 454.893  24
   2  -1   9 4509.64 578.721  32
   2  -1   9 4829.43 597.092  19
  -2  -1  -9 4629.81 449.723   8
  -2  -1 -10 2347.31 262.429  33
   2  -1  10 2313.77 434.061  32
  -2  -1 -10 2698.39 373.167  24
   2  -1  10 3258.04 495.379  19
  -2  -1 -10 2491.08 351.485   8
  -2  -1 -10 2452.41 354.506  26
  -2  -1 -10 2186.88 451.687   1
  -2  -1 -10 2577.67 308.761  17
  -2  -1 -11 4619.90 492.237   8
  -2  -1 -11 3784.48 329.932  33
  -2  -1 -11 4017.68 495.270  13
  -2  -1 -11 4219.67 403.746  17
  -2  -1 -11 4497.44 474.635  26
  -2  -1 -11 4461.92 497.669  24
  -2  -1 -12 325.300 175.597   8
  -2  -1 -12 540.575 236.225  24
  -2  -1 -12 711.026 254.936  13
  -2  -1 -12 298.996 189.262  26
  -2  -1 -13 1395.28 294.833  13
  -2  -1 -13 1297.70 272.998   8
   2  -1  13 1066.33 217.072  21
  -2  -1 -13 1080.76 254.596  24
  -2  -1 -14 552.549 179.526  24
  -2  -1 -14 413.640 154.940  13
   2  -1  14 484.657 137.510  21
  -2  -1 -14 445.746 160.319   8
   2  -1  15 321.184 97.9485  23
  -2  -1 -15 148.625 78.5544   8
  -2   0  16 1400.62 194.671  23
   2   0 -16 1335.13 216.936   8
  -2   0  15 833.367 182.022  23
   2   0 -15 814.423 198.606   8
   2   0 -15 432.778 123.019   9
   2   0 -14 162.097 138.525   8
   2   0 -14 117.149 91.7190   9
  -2   0  14-5.09070 110.595  23
   2   0 -14 4.51751 158.642  24
   2   0 -13 6633.97 610.553  13
   2   0 -13 6375.16 491.603   9
   2   0 -13 6325.52 546.334  24
   2   0 -13 5558.98 493.636   8
   2   0 -12 763.957 226.644  24
   2   0 -12 542.269 183.128   8
  -2   0  12 1186.52 310.934  30
  -2   0  12 1105.59 297.029  32
   2   0 -12 594.409 157.333  22
   2   0 -12 732.148 149.670  16
  -2   0  12 970.109 285.543   2
   2   0 -12 894.399 192.522   9
   2   0 -12 917.583 257.391  13
   2   0 -11 21088.0 902.363  24
   2   0 -11 19759.5 769.730  22
   2   0 -11 21902.6 1014.30  13
  -2   0  11 19782.2 1153.82   2
   2   0 -11 19405.0 834.953   8
   2   0 -11 21605.7 846.916   9
  -2   0  11 19143.6 1176.70  32
  -2   0  11 19221.5 1221.04  30
   2   0 -10 18754.4 760.719   8
   2   0 -10 22646.2 958.650  13
   2   0 -10 19186.3 701.636  22
  -2   0  10 18820.1 1129.77  30
   2   0 -10 20105.2 770.538   9
   2   0 -10 21065.4 840.836  24
  -2   0  10 20269.7 1130.05  32
   2   0  -9 1066.39 170.916  26
   2   0  -9 1248.51 177.211  22
  -2   0   9 1012.77 224.491  32
  -2   0   9 1387.31 300.576  30
   2   0  -9 1535.63 229.957  24
   2   0  -9 1348.88 231.229  13
   2   0  -9 1063.34 180.878   8
   2   0  -9 1276.18 164.917  16
  -2   0   8 18033.7 903.153  32
   2   0  -8 18644.0 585.571  22
  -2   0   8 18690.9 969.107  30
   2   0  -7 2318.27 187.899  22
  -2   0   7 1604.55 167.637  19
   2   0  -7 1536.97 261.472   1
  -2   0   7 1814.96 267.641  32
  -2   0   6 19052.9 765.347  32
   2   0  -6 18749.7 777.646   1
   2   0  -5 42830.9 899.398  18
   2   0  -5 41457.1 1055.69   1
  -2   0   5 38093.3 594.586  19
  -2   0   5 43144.0 1039.06  32
  -2   0   5 44782.4 1141.81  30
   2   0  -5 39984.9 913.863  20
  -2   0   4 108175. 1599.63  30
   2   0  -4 111493. 1431.18  20
   2   0  -4 109549. 1234.65  18
  -2   0   4 108050. 1472.91  32
  -2   0   4 105361. 1499.17   2
   2   0  -3 150694. 1170.64  18
  -2   0   3 147065. 1505.67  32
  -2   0   3 146545. 1657.92  30
   2   0  -3 148380. 1519.18  20
  -2   0   2 24390.1 558.492  32
  -2   0   2 25615.0 624.045  30
  -2   0   2 26006.9 608.436   2
   2   0  -2 26296.5 398.686  18
   2   0  -2 26226.9 597.940  20
  -2   0   1 98729.2 1212.60  30
  -2   0   1 99450.0 1115.43   2
   2   0  -1 101291. 1124.37  20
   2   0  -1 93602.6 893.480  19
  -2   0   1 93450.8 1029.22  32
  -2   0   0 464751. 2592.78  30
   2   0   0 461409. 2266.55  20
  -2   0   0 467966. 1585.30  31
  -2   0  -1 673207. 3221.58   2
   2   0   1 652266. 3642.30  19
  -2   0  -1 656428. 2420.75  31
  -2   0  -1 672076. 3394.29  30
   2   0   1 641667. 2481.83  20
   2   0   2 6397.46 213.791  20
   2   0   2 7082.11 441.868  19
  -2   0  -2 6972.30 392.104  30
  -2   0  -2 5923.71 290.176  31
  -2   0  -2 7022.77 259.989   3
  -2   0  -3 1617.12 131.856   3
  -2   0  -3 1458.36 156.843  31
   2   0   3 1266.65 69.2168  20
   2   0   3 1753.14 254.231  19
  -2   0  -4 25.9837 42.5235  31
   2   0   4-1.94525 126.847  19
  -2   0  -5 4051.16 379.374   1
  -2   0  -5 3819.11 253.388   3
   2   0   5 4010.74 444.969  19
   2   0   6 17229.5 964.752  19
  -2   0  -6 16466.3 814.058   1
   2   0   6 17482.9 912.336  32
  -2   0  -6 17277.6 555.401  33
  -2   0  -7 8136.50 457.382  25
  -2   0  -7 6745.78 437.698  24
   2   0   7 8598.07 701.693  32
  -2   0  -7 8840.52 670.757   1
  -2   0  -7 8221.33 453.748  26
   2   0   7 8934.47 735.494  19
  -2   0  -7 7931.53 413.615  17
  -2   0  -7 8681.54 423.792  33
  -2   0  -8 417.847 157.087  24
   2   0   8 112.510 138.818  32
  -2   0  -8 15.0574 131.998   1
  -2   0  -8 475.363 144.020  26
   2   0   8 282.433 162.770  19
  -2   0  -8 287.811 118.573  17
  -2   0  -8 336.970 109.958  33
  -2   0  -9 534.085 272.043   1
   2   0   9 335.846 185.963  19
  -2   0  -9 553.173 184.275   8
  -2   0  -9 343.491 158.234  26
  -2   0  -9 366.441 175.833  24
  -2   0  -9 541.898 124.177  33
  -2   0  -9 509.504 151.926  17
   2   0   9 635.913 249.197  32
   2   0  10 5206.26 668.133  32
  -2   0 -10 5640.98 400.769  33
   2   0  10 4893.86 607.657  19
  -2   0 -10 5075.08 490.713   8
  -2   0 -10 5260.45 434.710  17
  -2   0 -10 5270.47 502.290  24
  -2   0 -10 4924.27 512.614  13
  -2   0 -10 5818.81 505.393  26
  -2   0 -11 10761.8 778.256  13
  -2   0 -11 12089.1 772.180  24
  -2   0 -11 9831.89 521.371  33
  -2   0 -11 11185.1 734.315   8
  -2   0 -11 11079.5 715.703  26
  -2   0 -11 10638.2 627.859  17
  -2   0 -12-6.65803 139.622   8
  -2   0 -12 66.1883 160.975  13
  -2   0 -12 18.1664 146.748  26
  -2   0 -12 91.8877 164.446  24
  -2   0 -13 375.722 177.476   8
  -2   0 -13 817.864 241.689  24
  -2   0 -13 394.111 183.702  26
  -2   0 -13 438.245 194.017  13
   2   0  13 478.354 167.597  21
  -2   0 -14 27.1787 96.3941   8
  -2   0 -14 20.5209 114.870  24
  -2   0 -14-43.6229 116.689  13
   2   0  14-88.6067 88.8440  21
  -2   0 -15 465.615 122.050   8
   2   0  15 755.076 142.828  23
  -2   1  16-179.297 82.7835  23
   2   1 -16 96.8657 86.1863   8
   2   1 -15 441.232 172.278   8
  -2   1  15 516.648 140.064  23
   2   1 -15 348.249 106.179   9
   2   1 -14 2327.40 341.815  24
   2   1 -14 2125.99 327.377   8
   2   1 -14 2168.80 281.713   9
   2   1 -13 2924.58 381.620  24
   2   1 -13 2620.23 409.051  13
   2   1 -13 2458.55 266.715  16
   2   1 -13 1950.73 280.209  22
   2   1 -13 2440.09 320.167   9
   2   1 -13 1949.49 313.683   8
   2   1 -12 5010.81 483.231  24
   2   1 -12 5279.99 538.421  13
   2   1 -12 4540.46 397.796  22
  -2   1  12 3510.12 513.158  32
  -2   1  12 4113.54 564.957   2
   2   1 -12 5293.26 453.195   9
   2   1 -12 3364.07 301.767  16
   2   1 -12 4255.97 420.972   8
  -2   1  12 5241.63 657.795  30
   2   1 -11 2471.21 362.014  13
   2   1 -11 2395.90 334.406  24
   2   1 -11 2165.42 268.386  22
  -2   1  11 1967.18 366.690  32
   2   1 -11 1988.62 278.963   8
   2   1 -11 1834.03 228.463  16
   2   1 -11 2507.77 297.984   9
  -2   1  11 1903.60 401.580  30
  -2   1  11 2514.87 432.324   2
   2   1 -10 8771.23 512.570  26
   2   1 -10 8434.03 445.931  16
  -2   1  10 8548.90 726.825  32
   2   1 -10 10334.7 663.314  13
   2   1 -10 8536.03 512.193   8
   2   1 -10 8772.78 482.094  22
   2   1 -10 9023.28 570.109  24
  -2   1  10 9838.59 765.240   2
  -2   1  10 8361.96 763.120  30
   2   1  -9 584.416 112.459  16
   2   1  -9 1083.52 179.612   8
  -2   1   9 1175.61 248.355   2
   2   1  -9 1112.39 180.980  24
  -2   1   9 1050.96 243.253  32
   2   1  -9 1133.94 208.779  13
   2   1  -9 866.958 146.990  22
  -2   1   9 1168.76 274.348  30
   2   1  -9 1047.19 165.078  26
  -2   1   8 34782.3 1228.85  32
   2   1  -8 35818.3 809.781  22
   2   1  -8 32788.6 1123.56   1
   2   1  -7 22498.1 859.964   1
   2   1  -7 24583.6 607.814  22
  -2   1   7 22823.6 899.134  32
  -2   1   6 23618.6 591.777  19
   2   1  -6 25229.2 736.854  20
   2   1  -6 25876.3 833.103   1
  -2   1   6 25000.1 853.133  32
  -2   1   5 23652.2 843.624  30
  -2   1   5 22454.6 754.419   2
  -2   1   5 22209.4 713.134  32
   2   1  -5 22047.1 665.547  20
  -2   1   4 100426. 1569.06  30
   2   1  -4 94224.2 1459.30  31
   2   1  -4 99668.9 1366.24  20
  -2   1   4 93291.4 1386.65   2
  -2   1   4 92587.6 1289.34  32
  -2   1   3 676120. 3376.73   2
   2   1  -3 672493. 3599.67  31
  -2   1   2 53579.2 916.566  30
  -2   1   2 51901.6 864.587   2
  -2   1   2 52820.0 699.007  32
  -2   1   1 71140.5 961.472   2
  -2   1   1 71538.4 1011.82  30
  -2   1   0 138011. 1383.09   2
   2   1   0 137282. 1839.97  20
  -2   1   0 133950. 1381.10  30
  -2   1  -1 160016. 1622.76   2
  -2   1  -1 150617. 1581.60  30
   2   1   1 144357. 1919.85  20
  -2   1  -1 148268. 1313.52  31
   2   1   1 163816. 1814.67  19
  -2   1  -2 85376.7 1341.66  30
   2   1   2 86062.7 1501.30  19
  -2   1  -2 85060.7 1080.25   3
  -2   1  -2 85381.8 1412.93  31
  -2   1  -3 83298.6 1554.97  31
  -2   1  -3 80419.8 1095.68   3
   2   1   3 79779.8 1673.20  19
   2   1   4 60729.1 1581.39  19
  -2   1  -4 60109.8 1017.30   3
  -2   1  -5 18393.4 745.603  31
   2   1   5 17286.1 913.438  19
  -2   1  -5 17700.6 741.476   1
  -2   1  -6 13535.4 710.160   1
  -2   1  -6 13362.2 511.211  33
   2   1   6 13409.7 875.706  19
  -2   1  -6 12540.5 441.535  22
  -2   1  -7 3671.74 415.033   1
  -2   1  -7 3485.14 316.217  24
  -2   1  -7 3534.50 300.368  26
   2   1   7 3912.14 486.359  32
  -2   1  -7 3512.92 283.656  17
  -2   1  -7 3418.86 280.402  33
   2   1   7 3442.98 465.350  19
  -2   1  -7 3096.01 293.813  25
  -2   1  -8 539.084 129.549  33
   2   1   8 830.926 244.962  32
   2   1   8 146.284 125.062  19
  -2   1  -8 535.631 147.799  17
  -2   1  -8 684.558 163.873  26
  -2   1  -8 395.647 137.543  24
  -2   1  -8-124.969 145.179   1
  -2   1  -9 4602.75 438.632  24
  -2   1  -9 4456.91 463.019  13
   2   1   9 5572.82 632.274  19
  -2   1  -9 4351.00 413.342  26
  -2   1  -9 5001.08 367.163  33
   2   1   9 4914.10 621.856  32
  -2   1  -9 4658.62 385.165  17
  -2   1 -10 1998.27 340.291  24
  -2   1 -10 2151.38 330.587  26
   2   1  10 998.548 286.377  19
  -2   1 -10 2042.02 255.106  33
  -2   1 -10 2239.41 360.897  13
   2   1  10 1880.71 404.740  32
  -2   1 -10 1981.35 279.770  17
  -2   1 -10 2167.01 346.409   8
  -2   1 -11 4223.73 492.508  13
  -2   1 -11 4590.40 489.675   8
  -2   1 -11 4841.26 504.755  24
  -2   1 -11 4263.56 459.609  26
  -2   1 -11 3248.57 308.414  33
  -2   1 -12 386.777 198.567  24
  -2   1 -12 444.487 214.007   8
  -2   1 -12 666.296 232.633  13
  -2   1 -12 278.384 191.787  26
  -2   1 -13 1006.60 238.764   8
  -2   1 -13 1176.54 266.650  24
  -2   1 -13 1123.31 273.177  13
   2   1  13 754.273 192.008  21
  -2   1 -13 847.530 219.898  26
  -2   1 -14 559.712 165.309   8
  -2   1 -14 528.539 165.029  24
   2   1  14 561.773 158.902  21
  -2   1 -15 201.683 87.4946   8
  -2   2  16 222.822 87.8932  23
   2   2 -16 361.472 123.788   8
  -2   2  15-4.37378 93.0277  23
   2   2 -15 17.0983 105.295   8
   2   2 -15-13.3572 64.7957   9
   2   2 -14 925.095 219.045   8
   2   2 -14 1144.54 223.890   9
   2   2 -13 4882.94 489.528  24
   2   2 -13 5171.34 455.584   9
   2   2 -13 3932.02 379.521  22
   2   2 -13 3235.88 305.983  16
   2   2 -13 4001.98 418.864   8
  -2   2  12 1379.39 352.708  30
   2   2 -12 1091.03 227.202   8
   2   2 -12 1128.57 187.276  16
   2   2 -12 1286.41 223.700  22
   2   2 -12 1324.48 300.355  13
   2   2 -12 1499.48 305.925  24
   2   2 -12 1479.22 257.442   9
  -2   2  12 1004.28 285.599  32
   2   2 -11 796.171 160.614  16
   2   2 -11 809.992 240.917  24
  -2   2  11 699.702 218.924  32
   2   2 -11 677.003 162.687  22
   2   2 -11 901.440 229.326  13
  -2   2  11 591.776 242.580  30
  -2   2  11 441.590 205.704   2
   2   2 -11 489.602 162.939   8
  -2   2  10 12083.9 915.402  30
   2   2 -10 12244.6 601.156  26
   2   2 -10 14148.6 727.539  24
   2   2 -10 12787.6 582.347  22
   2   2 -10 15466.5 817.968  13
  -2   2  10 12289.6 847.118  32
   2   2 -10 11630.4 519.432  16
  -2   2  10 14623.7 955.733   2
   2   2 -10 12328.1 627.471   8
   2   2  -9 10103.5 608.525  13
   2   2  -9 8173.32 450.786  26
  -2   2   9 9031.83 693.518   2
   2   2  -9 8036.08 424.674  22
   2   2  -9 8959.85 528.142  24
   2   2  -9 7384.99 386.525  16
  -2   2   9 8208.81 639.708  32
   2   2  -9 7945.69 458.592   8
  -2   2   9 8536.21 715.603  30
  -2   2   8 25445.8 1033.87  32
   2   2  -8 25801.5 699.855  22
  -2   2   8 26692.1 1177.45  30
  -2   2   8 26189.1 1073.41   2
  -2   2   7 10965.0 612.652  32
   2   2  -7 8121.46 421.782  20
  -2   2   7 7716.24 411.376  19
  -2   2   7 11473.1 645.893   2
   2   2  -7 11906.8 430.656  22
  -2   2   6 31837.8 1093.89  30
  -2   2   6 28903.2 893.697  32
   2   2  -6 27627.5 1091.04  31
  -2   2   6 29769.3 958.394   2
   2   2  -6 31773.1 850.846  20
  -2   2   5 7590.82 433.012   2
  -2   2   5 8018.69 414.489  32
  -2   2   5 8111.74 508.110  30
   2   2  -5 6844.64 488.918  31
   2   2  -5 8455.72 439.270  20
  -2   2   5 6546.13 317.534  19
   2   2  -4 50712.6 1126.79  20
   2   2  -4 46187.6 1095.29  31
  -2   2   4 45574.5 1089.18  30
  -2   2   4 42876.1 823.666  32
  -2   2   4 40277.0 914.577   2
  -2   2   3 53399.5 745.296  32
   2   2  -3 55404.1 1088.01  31
  -2   2   3 52238.3 934.033   2
  -2   2   3 53219.2 1072.28  30
  -2   2   2 668994. 3070.71   2
  -2   2   2 669371. 3327.63  30
   2   2  -1 41346.6 1107.69  20
  -2   2   1 41021.8 778.265  30
  -2   2   0 470832. 2667.24   2
   2   2   0 465144. 3599.47  20
  -2   2   0 465771. 2569.19  30
  -2   2  -1 227611. 1939.98   3
  -2   2  -1 227321. 1889.98  31
  -2   2  -2 62053.5 1240.78  31
   2   2   2 66205.6 1248.80  20
   2   2   2 63051.1 1283.34  19
  -2   2  -2 64003.0 1062.88   3
  -2   2  -2 60588.2 1118.92  30
   2   2   3 120103. 1994.70  19
  -2   2  -3 119640. 1534.06   3
  -2   2  -3 122572. 2193.19  31
   2   2   3 118261. 1713.02  20
  -2   2  -4 120568. 1625.64   3
   2   2   4 105085. 1655.39  20
  -2   2  -4 135369. 2424.52  31
   2   2   4 115790. 2217.58  19
  -2   2  -4 127768. 1808.33   1
  -2   2  -5 52505.5 1226.58   1
  -2   2  -5 50137.7 958.496  33
   2   2   5 48172.6 1568.63  19
  -2   2  -5 46978.9 1113.39   3
  -2   2  -5 53109.0 1525.00  31
  -2   2  -6 26785.2 750.770  33
   2   2   6 25993.2 1221.58  19
  -2   2  -6 26704.3 1086.54  31
  -2   2  -6 28039.8 981.349   1
  -2   2  -7 1657.97 217.971  25
   2   2   7 2069.86 366.210  32
  -2   2  -7 1938.56 219.179  33
  -2   2  -7 1329.94 264.272  31
  -2   2  -7 1722.21 235.291  24
  -2   2  -7 1678.64 186.338  22
   2   2   7 1932.46 365.710  19
  -2   2  -7 1935.87 221.525  17
  -2   2  -7 2439.28 250.406  26
  -2   2  -7 2348.49 321.779   1
  -2   2  -8 7645.01 487.065  26
  -2   2  -8 7609.93 457.122  17
  -2   2  -8 7381.59 442.118  33
   2   2   8 7775.58 746.409  19
  -2   2  -8 6865.70 521.891  13
  -2   2  -8 7124.50 505.697  24
  -2   2  -8 6503.33 345.530  11
   2   2   8 8088.49 743.152  32
  -2   2  -8 6546.50 579.263   1
  -2   2  -9 7825.36 601.262  13
  -2   2  -9 7789.99 562.283  24
   2   2   9 8288.63 801.467  32
  -2   2  -9 8077.62 475.085  33
  -2   2  -9 8081.09 540.641  26
   2   2   9 7442.31 756.731  19
  -2   2  -9 7927.29 506.943  17
  -2   2 -10 3181.46 358.285  17
  -2   2 -10 3334.43 409.725  24
  -2   2 -10 2962.12 384.428  26
  -2   2 -10 3310.32 416.681  13
  -2   2 -10 3515.14 424.593   8
   2   2  10 2637.39 475.783  32
  -2   2 -10 3364.30 322.244  33
  -2   2 -11 2816.45 293.535  33
  -2   2 -11 4298.63 471.865  24
  -2   2 -11 3387.39 439.472  13
  -2   2 -11 3952.45 446.996  26
  -2   2 -11 3640.79 444.220   8
  -2   2 -12 1115.72 271.503  24
  -2   2 -12 1151.16 293.042   8
  -2   2 -12 998.084 261.036  13
  -2   2 -12 945.059 164.307  33
  -2   2 -12 1041.34 272.459  26
  -2   2 -13 1154.23 249.405  13
  -2   2 -13 1409.03 272.075  24
  -2   2 -13 862.631 232.088   8
   2   2  13 1053.57 216.659  21
  -2   2 -13 902.869 225.509  26
   2   2  14 437.105 133.221  21
  -2   2 -14 518.560 165.183   8
  -2   2 -15-177.209 86.6611   8
   2   3 -16 262.861 104.275   8
   2   3 -16 154.643 55.9052   9
   2   3 -15 1232.92 199.552   9
  -2   3  15 701.385 131.543  23
   2   3 -15 1226.07 224.773   8
   2   3 -14 761.017 183.279   8
   2   3 -14 1002.75 210.469   9
   2   3 -14 905.175 188.801  22
   2   3 -14 643.911 145.741  16
   2   3 -13 219.604 110.292  16
   2   3 -13 390.309 131.482  22
   2   3 -13 302.017 146.317   8
   2   3 -13 147.226 131.515   9
   2   3 -12 229.904 129.743   8
   2   3 -12 331.190 137.465  16
   2   3 -12 289.578 136.084  22
   2   3 -11 306.782 148.558   8
  -2   3  11 542.304 237.211  30
  -2   3  11 289.204 171.665  32
   2   3 -11 450.457 150.034  22
   2   3 -11 475.901 192.386  24
   2   3 -11 615.337 153.713  16
   2   3 -10 6707.65 443.025  26
   2   3 -10 6443.94 409.670  16
   2   3 -10 7437.96 542.519  24
   2   3 -10 8042.86 604.530  13
  -2   3  10 6001.72 579.686  32
   2   3 -10 6575.99 453.336   8
  -2   3  10 5896.06 639.734  30
   2   3 -10 4727.01 303.673  11
   2   3 -10 7044.84 440.191  22
  -2   3  10 5269.65 591.229   2
   2   3  -9 570.577 134.941  26
   2   3  -9 485.262 125.109  16
   2   3  -9 375.740 91.5191  11
   2   3  -9 572.743 172.006  13
   2   3  -9 693.172 182.977  24
  -2   3   9 544.601 168.155  32
   2   3  -9 459.346 115.947  22
  -2   3   9 914.455 240.803   2
  -2   3   9 373.886 172.691  30
   2   3  -9 549.030 140.218   8
   2   3  -8 13419.3 846.984  31
   2   3  -8 13499.4 497.504  16
   2   3  -8 14140.7 523.494  22
   2   3  -8 16144.7 711.166  13
  -2   3   8 13787.2 788.758   2
   2   3  -8 13364.8 594.699  24
  -2   3   8 13530.2 854.157  30
  -2   3   8 12780.8 715.066  32
  -2   3   7 17266.4 793.236   2
   2   3  -7 19188.7 549.924  22
  -2   3   7 16522.9 735.449  32
   2   3  -7 17519.7 664.340  20
  -2   3   7 15324.2 638.855  19
   2   3  -7 16888.5 887.833  31
  -2   3   7 18755.0 928.262  30
   2   3  -6 44772.5 1069.80  20
  -2   3   6 40725.7 1255.88  30
  -2   3   6 36446.6 922.176  19
  -2   3   6 38360.3 1005.32  32
  -2   3   6 38700.7 1088.26   2
   2   3  -6 42080.0 1370.81  31
   2   3  -5 21293.1 879.516  31
   2   3  -5 23131.1 830.554  20
   2   3  -5 20908.6 847.886   3
  -2   3   5 19773.5 628.192  32
  -2   3   5 22676.4 732.589   2
  -2   3   5 22008.2 846.613  30
   2   3  -4 177234. 2278.06   3
  -2   3   4 169463. 1799.88   2
  -2   3   4 171406. 1552.39  32
   2   3  -4 181055. 2523.35  20
  -2   3   4 177343. 2203.78  30
   2   3  -3 29947.7 868.320   3
   2   3  -3 23200.2 978.718  20
  -2   3   3 25258.2 458.100  32
   2   3  -3 28167.5 890.818  31
  -2   3   3 27487.3 775.785  30
  -2   3   3 24780.6 625.825   2
  -2   3   2 290403. 2262.86  30
  -2   3   2 284979. 2021.55   2
   2   3  -2 288451. 3096.95  20
   2   3  -1 764182. 4552.95  20
   2   3  -1 817373. 3780.83   3
   2   3  -1 729552. 3626.38  31
  -2   3   1 747957. 3273.88   2
  -2   3   1 792688. 3950.25  31
  -2   3   1 761251. 3409.27  30
   2   3   0 744154. 4222.28  20
  -2   3   0 663107. 3273.01   2
  -2   3   0 707073. 3666.34  31
  -2   3   0 657720. 3016.59  30
  -2   3   0 704996. 3695.46   3
  -2   3  -1 352079. 2680.58  31
  -2   3  -1 351148. 2665.54   3
  -2   3  -2 19773.0 659.573   3
  -2   3  -2 20859.2 776.969  31
   2   3   2 18019.0 351.942  31
   2   3   2 19515.3 673.670  20
  -2   3  -3 220779. 2308.18   3
   2   3   3 222843. 2770.27  19
  -2   3  -3 229424. 3157.98  31
   2   3   4 77334.6 1826.52  19
  -2   3  -4 79806.3 1469.09   3
   2   3   4 77679.4 1428.76  20
  -2   3  -5 159225. 2240.89   3
   2   3   5 164181. 2884.38  19
  -2   3  -5 157242. 1780.71  33
  -2   3  -6 3164.23 445.152  31
  -2   3  -6 1960.91 279.765   3
  -2   3  -6 3068.65 264.389  33
  -2   3  -6 2328.56 283.236   1
   2   3   6 4015.94 510.599  19
  -2   3  -6 2778.57 209.255  22
  -2   3  -7 10653.9 519.369  26
  -2   3  -7 9805.17 505.130  25
  -2   3  -7 11279.1 657.013   1
  -2   3  -7 9295.21 728.153  31
  -2   3  -7 10259.4 508.711  33
  -2   3  -7 9674.21 558.011  13
  -2   3  -7 8876.39 626.357   3
   2   3   7 9892.73 835.035  19
  -2   3  -7 10469.0 501.932  17
  -2   3  -7 9163.04 417.483  22
  -2   3  -7 7163.62 368.570  11
  -2   3  -7 8940.85 517.349  24
  -2   3  -8 8872.54 491.528  33
  -2   3  -8 7697.99 547.722  13
  -2   3  -8 8421.43 509.938  26
   2   3   8 8392.45 761.851  32
  -2   3  -8 4721.08 502.639  31
  -2   3  -8 7546.03 413.136  22
  -2   3  -8 5516.04 341.111  11
   2   3   8 8048.37 789.241  19
  -2   3  -8 7848.68 525.049  24
  -2   3  -8 7919.54 478.237  17
  -2   3  -9 3668.32 331.638  33
  -2   3  -9 2107.02 231.640  16
  -2   3  -9 3008.80 371.508  24
  -2   3  -9 3584.40 403.058  13
  -2   3  -9 3414.82 357.835  26
  -2   3  -9 2345.56 232.929  11
   2   3   9 3447.37 519.879  32
   2   3   9 3541.85 539.389  19
  -2   3  -9 3268.13 348.863  17
   2   3  10 13756.1 1039.24  19
  -2   3 -10 12179.7 741.685  24
  -2   3 -10 12244.2 766.278  13
  -2   3 -10 13062.8 605.918  33
  -2   3 -10 12282.9 715.307  26
  -2   3 -11 19268.4 899.023  26
  -2   3 -11 18824.6 954.634  13
  -2   3 -11 21024.8 968.297  24
  -2   3 -11 20171.0 966.236   8
  -2   3 -12 6829.58 542.341  26
  -2   3 -12 7314.43 585.596  13
  -2   3 -12 7538.32 582.436  24
  -2   3 -12 6261.98 386.823  33
  -2   3 -12 7397.31 595.530   8
  -2   3 -13 931.886 208.395  26
   2   3  13 1043.10 210.424  21
  -2   3 -13 823.773 227.235   8
   2   3  14 125.339 83.6607  21
  -2   3 -14 68.1504 107.671   8
  -2   3 -15-70.9375 74.1112   8
   2   4 -16 323.728 97.2828   8
   2   4 -16-86.6889 59.4900   9
   2   4 -15 391.516 126.575   9
   2   4 -15 321.305 132.257   8
   2   4 -14 148.018 128.615   8
   2   4 -14 175.408 105.401  16
   2   4 -14 34.9725 98.4967  22
   2   4 -14 203.724 126.492   9
   2   4 -13 927.585 193.974  22
   2   4 -13 776.281 200.504   8
   2   4 -13 1029.24 198.255  16
   2   4 -12 1115.72 229.731   8
   2   4 -12 1055.37 212.794  22
   2   4 -12 1115.09 208.556  16
   2   4 -11 7511.72 489.481  22
   2   4 -11 6979.61 448.388  16
  -2   4  11 7201.37 754.320  30
   2   4 -11 6959.88 494.323   8
   2   4 -10 6759.25 437.916  26
   2   4 -10 6850.59 458.918   8
  -2   4  10 4803.72 486.796  32
   2   4 -10 4941.42 330.516  11
   2   4 -10 7701.81 462.239  22
  -2   4  10 6663.76 699.156  30
   2   4 -10 6902.20 432.946  16
   2   4  -9 10670.8 504.373  26
  -2   4   9 9728.38 785.429  30
   2   4  -9 11256.6 513.653  16
   2   4  -9 11644.4 528.744  22
   2   4  -9 10255.9 514.611   8
  -2   4   9 10710.9 704.341  32
  -2   4   8 9603.96 606.969  32
  -2   4   8 10805.4 698.728   2
  -2   4   8 9850.81 737.807  30
   2   4  -8 10511.3 462.918  16
   2   4  -8 10766.6 469.498  22
   2   4  -8 8512.61 760.630  31
   2   4  -8 7688.59 368.828  11
  -2   4   7 7540.21 518.545   2
   2   4  -7 7948.89 473.243  20
   2   4  -7 6464.35 621.534  31
   2   4  -7 7318.69 354.518  22
  -2   4   7 6495.35 457.026  19
  -2   4   7 6889.80 467.613  32
  -2   4   7 7692.47 609.256  30
  -2   4   6 18325.8 727.895   2
   2   4  -6 21459.4 535.899  22
   2   4  -6 21933.7 962.909   3
   2   4  -6 22411.0 890.717  20
  -2   4   6 18477.3 679.205  32
  -2   4   6 21483.1 936.097  30
  -2   4   6 20862.9 750.460  19
   2   4  -6 21390.4 1019.84  31
  -2   4   5 26497.8 702.934  32
   2   4  -5 31093.5 1120.66  20
   2   4  -5 30442.6 1086.07   3
  -2   4   5 29082.5 997.124  30
  -2   4   5 25041.5 745.210   2
   2   4  -5 29196.3 1140.14  31
   2   4  -4 22101.4 1041.67  20
   2   4  -4 25852.1 989.229  31
  -2   4   4 22780.9 531.403  32
   2   4  -4 25495.7 915.999   3
  -2   4   4 23792.9 832.860  30
  -2   4   4 21716.6 623.906   2
  -2   4   3 47671.2 1041.85  30
  -2   4   3 44336.3 823.493   2
   2   4  -3 46633.0 1389.00  20
   2   4  -3 51420.2 1327.49  31
   2   4  -3 53970.0 1244.41   3
  -2   4   3 42368.6 498.823  32
   2   4  -2 65628.1 1402.90  31
  -2   4   2 65800.3 1089.70  30
  -2   4   2 63100.2 947.186   2
   2   4  -2 69091.2 1521.06  20
   2   4  -2 74924.1 1365.87   3
  -2   4   2 70602.7 1368.96  31
  -2   4   1 206960. 1770.77  30
   2   4  -1 220169. 2163.19   3
  -2   4   1 212151. 2288.29  31
   2   4  -1 202896. 2197.04  31
  -2   4   1 215033. 2251.77   3
  -2   4   1 206793. 1772.66   2
   2   4  -1 225508. 2546.68  20
  -2   4   0 16579.6 633.140  31
   2   4   0 15752.1 512.359  31
   2   4   0 18175.6 690.671  20
   2   4   0 16979.7 531.495   3
  -2   4   0 15578.8 450.455  30
  -2   4   0 17118.7 637.466   3
  -2   4  -1 107857. 1626.76   3
   2   4   1 112015. 1690.18  20
   2   4   1 92339.5 1052.49  31
  -2   4  -1 96249.9 1203.35  30
  -2   4  -1 98791.4 1601.93  31
  -2   4  -2 94900.4 1814.45  31
  -2   4  -2 96854.3 1601.35   3
   2   4   2 92114.4 1536.87  20
   2   4   3 19218.4 723.509  20
   2   4   3 13124.3 408.414  31
  -2   4  -3 19165.5 746.991   3
  -2   4  -3 20386.3 985.908  31
  -2   4  -3 12510.5 381.823  20
   2   4   4 3306.15 391.688  19
   2   4   4 3319.33 317.884  20
  -2   4  -4 3041.86 328.718   3
  -2   4  -4 2267.39 414.397  31
  -2   4  -4 2772.92 234.657  33
  -2   4  -5 21929.4 907.262   3
   2   4   5 20187.4 798.417  20
  -2   4  -5 23529.6 1248.13  31
  -2   4  -5 23725.4 781.164   1
   2   4   5 21480.7 1071.44  19
  -2   4  -5 20273.3 670.542  33
  -2   4  -6 7769.52 402.783   4
  -2   4  -6 5363.95 343.131  26
  -2   4  -6 5716.44 327.512  11
  -2   4  -6 7074.27 420.216  33
  -2   4  -6 6828.48 326.376  22
   2   4   6 7240.81 685.270  19
  -2   4  -6 6205.52 364.283  17
  -2   4  -6 7013.70 724.445  31
  -2   4  -6 6870.23 551.679   3
   2   4   7 9656.52 843.338  19
  -2   4  -7 10002.0 462.008  11
  -2   4  -7 8915.53 522.551  24
  -2   4  -7 9076.53 533.614  13
  -2   4  -7 8735.04 409.319  22
  -2   4  -7 9889.93 506.518  17
  -2   4  -7 9215.74 487.474  26
  -2   4  -7 9582.88 476.218  14
  -2   4  -7 9537.10 507.578  33
  -2   4  -7 8519.71 765.354  31
  -2   4  -8 9297.07 538.474  26
  -2   4  -8 8490.39 561.414  13
  -2   4  -8 9408.03 465.779  11
  -2   4  -8 8161.00 431.747  22
   2   4   8 9984.05 831.679  32
   2   4   8 8921.40 847.677  19
  -2   4  -8 8533.93 556.788  24
  -2   4  -8 9135.02 514.439  33
  -2   4  -8 8874.95 515.051  17
   2   4   9 12560.8 1033.27  19
  -2   4  -9 12185.2 712.789  24
  -2   4  -9 11777.7 536.267  11
  -2   4  -9 12144.3 712.880  13
   2   4   9 12713.7 977.792  32
  -2   4  -9 13304.6 629.081  33
  -2   4  -9 12254.8 669.993  26
  -2   4 -10 2143.73 317.284  26
  -2   4 -10 1418.97 207.054  16
  -2   4 -10 2038.03 324.491  24
  -2   4 -10 1489.31 196.090  11
  -2   4 -10 2141.76 328.994  13
  -2   4 -10 2389.46 273.917  33
   2   4  10 3094.10 485.653  19
   2   4  10 3033.54 485.879  32
  -2   4 -11 8724.23 605.076  26
  -2   4 -11 8492.36 629.997  13
  -2   4 -11 9484.11 663.447   8
  -2   4 -11 8466.99 621.586  24
  -2   4 -12 1023.08 230.296  26
  -2   4 -12 889.318 255.834   8
  -2   4 -12 866.798 163.046  33
   2   4  13 343.363 138.260  21
  -2   4 -13 397.539 163.721   8
  -2   4 -13 122.605 112.737  26
  -2   4 -14 324.099 122.797   8
   2   4  14 249.678 90.6801  21
   2   5 -15 59.7751 74.2874  16
   2   5 -15-145.734 88.1769   8
   2   5 -14 2590.97 270.893  16
   2   5 -14 2178.93 257.753  22
   2   5 -14 2565.52 306.886   9
   2   5 -14 1958.42 256.763   8
   2   5 -13 745.730 177.677   8
   2   5 -13 1115.59 202.239  16
   2   5 -13 883.317 185.038  22
   2   5 -12 6672.69 462.300  16
   2   5 -12 6441.63 480.946   8
   2   5 -12 5725.50 445.208  22
   2   5 -11 2105.14 276.570   8
   2   5 -11 2240.41 279.765  22
   2   5 -11 2104.19 273.615  16
   2   5 -10 15211.5 619.772  11
   2   5 -10 16587.8 688.907  22
   2   5 -10 16338.4 682.219  16
  -2   5  10 14281.8 1046.53  30
   2   5 -10 15935.9 685.354   8
   2   5  -9 21868.6 735.723  22
   2   5  -9 20724.3 688.658  11
  -2   5   9 20088.8 1158.14  30
   2   5  -9 21427.4 742.574  16
   2   5  -9 20166.2 713.229   8
   2   5  -8 14767.3 968.615  31
   2   5  -8 15158.3 592.022  16
   2   5  -8 16098.4 578.588  22
   2   5  -8 15606.7 563.617  11
  -2   5   8 13973.6 906.788  30
   2   5  -7 3048.82 250.229  16
  -2   5   7 2556.34 373.297  30
   2   5  -7 3057.13 420.343  31
   2   5  -7 3085.55 239.709  11
  -2   5   7 2440.58 275.622  32
   2   5  -7 3322.48 245.034  22
   2   5  -7 3249.10 429.106   3
  -2   5   7 2559.82 314.972  19
  -2   5   6 3443.46 390.980  30
   2   5  -6 3323.12 426.034   3
   2   5  -6 4042.32 466.095  31
   2   5  -6 3412.12 226.518  22
  -2   5   6 2918.68 272.874   2
  -2   5   6 3000.51 268.917  32
   2   5  -6 2441.21 332.168  20
   2   5  -5 3988.48 464.330  31
  -2   5   5 2963.32 236.860   2
  -2   5   5 2185.22 190.587  32
   2   5  -5 4115.28 436.254   3
   2   5  -5 3007.16 403.784  20
  -2   5   5 3217.70 347.318  30
   2   5  -4 9376.90 720.592  20
  -2   5   4 8707.43 304.338  32
   2   5  -4 11322.6 664.523   3
   2   5  -4 10605.8 709.056  31
  -2   5   4 9275.78 384.195   2
  -2   5   4 10442.1 554.929  30
  -2   5   3 21432.4 550.188   2
   2   5  -3 21272.5 956.386  31
   2   5  -3 24651.5 910.058   3
   2   5  -3 21512.5 979.385  20
  -2   5   3 22263.6 719.109  30
  -2   5   3 23866.9 916.511  31
   2   5  -2 107311. 1768.47   3
   2   5  -2 109474. 2008.88  20
  -2   5   2 94973.1 1169.84   2
  -2   5   2 94936.0 1345.17  30
  -2   5   2 103423. 1817.56  31
  -2   5   2 101018. 1665.23   3
   2   5  -2 101130. 1936.78  31
   2   5  -1 47646.4 1180.43  31
   2   5  -1 49218.7 1095.37   3
  -2   5   1 48294.1 1206.05  31
  -2   5   1 45191.2 807.028  30
  -2   5   1 48522.1 1157.70   3
  -2   5   0 219624. 2541.09  31
   2   5   0 220068. 2135.65   3
   2   5   0 215237. 2206.20  31
  -2   5   0 222209. 2488.41   3
  -2   5  -1 28929.2 918.661   3
  -2   5  -1 28398.7 988.004  31
  -2   5  -1 25633.4 599.403  30
   2   5   1 25031.6 662.029  31
   2   5   1 29715.3 965.120  20
  -2   5  -2 101727. 1996.57  31
  -2   5  -2 102515. 1794.12   3
   2   5   2 98072.1 1741.41  20
   2   5   3 26920.1 930.720  20
  -2   5  -3 28719.0 1236.09  31
   2   5   3 19054.1 558.212  31
  -2   5  -3 27556.5 967.694   3
   2   5   4 26371.6 950.431  20
  -2   5  -4 25793.4 715.496  33
  -2   5  -4 26930.2 1385.59  31
  -2   5  -4 26094.5 1003.21   3
  -2   5  -5 436.566 122.798  33
  -2   5  -5-59.8438 161.907  31
   2   5   5 290.002 113.152  20
  -2   5  -5 302.108 94.8561  11
  -2   5  -5 315.899 144.846   3
  -2   5  -6 8143.19 484.695  14
  -2   5  -6 8591.40 434.671  26
  -2   5  -6 8975.24 463.599   4
  -2   5  -6 9393.69 445.393  11
  -2   5  -6 6387.31 428.200  24
   2   5   6 8778.22 790.084  19
  -2   5  -6 7182.33 337.264  22
  -2   5  -6 7696.10 630.002   3
  -2   5  -6 7706.88 457.289  33
  -2   5  -6 7631.68 396.132  25
  -2   5  -6 7694.96 780.834  31
  -2   5  -6 9063.01 454.821  17
  -2   5  -7 3995.95 309.515  11
  -2   5  -7 3116.91 498.039  31
  -2   5  -7 3386.72 322.640  33
  -2   5  -7 3027.55 292.922  14
  -2   5  -7 3106.59 324.129  24
  -2   5  -7 2311.77 216.178  22
  -2   5  -7 3667.93 312.174  26
  -2   5  -7 3447.64 323.577  13
   2   5   7 3658.30 564.270  19
  -2   5  -7 2862.65 413.606   3
  -2   5  -7 3871.29 334.324  17
  -2   5  -8 1735.19 261.658  13
  -2   5  -8 2543.52 265.982  11
  -2   5  -8 2204.83 270.565  33
  -2   5  -8 1960.72 357.937  31
  -2   5  -8 2322.53 228.417  22
   2   5   8 2507.89 422.017  32
   2   5   8 2340.15 449.764  19
  -2   5  -8 2578.13 290.882  26
  -2   5  -8 1872.68 270.806  24
  -2   5  -9 333.757 132.999  24
  -2   5  -9 542.556 151.552  16
  -2   5  -9 766.763 193.064  33
  -2   5  -9 902.071 175.713  11
  -2   5  -9 522.216 168.308  13
   2   5   9 539.572 274.817  32
  -2   5  -9 546.065 175.146  26
   2   5   9 635.992 233.468  19
  -2   5 -10 5408.95 385.483  11
  -2   5 -10 4669.69 440.643  26
  -2   5 -10 3787.86 346.259  16
  -2   5 -10 4646.70 375.962  33
  -2   5 -11 1950.35 248.950  16
  -2   5 -11 1350.75 211.272  33
  -2   5 -11 1898.38 236.538  11
  -2   5 -11 2107.82 330.011   8
  -2   5 -11 1840.48 293.968  26
  -2   5 -12 808.808 219.575   8
  -2   5 -12 595.047 180.879  26
  -2   5 -13-79.1555 117.535   8
  -2   5 -13-131.078 108.403  26
   2   5  13 70.9599 84.8543  21
  -2   5 -14 62.6430 76.7535   8
   2   6 -15 398.022 108.825  16
   2   6 -15 400.718 115.423   9
   2   6 -14 168.729 95.1357  16
   2   6 -14 262.729 110.777  22
   2   6 -14 399.550 142.332   9
   2   6 -13 2435.23 284.656   8
   2   6 -13 2293.24 284.498  16
   2   6 -13 2195.84 268.545  22
   2   6 -12 3692.72 371.915  16
   2   6 -12 3103.27 321.182  22
   2   6 -12 3001.07 317.356   8
  -2   6  11 9713.28 906.889  30
   2   6 -11 9270.37 538.022   8
   2   6 -11 9678.27 548.529  22
   2   6 -11 9800.60 571.035  16
  -2   6  10 81.4693 93.8036  30
   2   6 -10 360.716 129.353  11
   2   6 -10 401.827 137.903  22
   2   6 -10 319.268 147.419  16
   2   6  -9 988.903 280.772  31
   2   6  -9 631.683 163.703  16
   2   6  -9 682.082 145.188  11
  -2   6   9 173.180 142.993  30
   2   6  -9 731.257 155.558  22
   2   6  -8 2934.91 288.377  16
   2   6  -8 2574.77 257.467   7
   2   6  -8 3099.34 270.919  22
  -2   6   8 2563.23 405.914  30
   2   6  -8 2894.45 271.468  11
   2   6  -8 2971.14 462.504  31
   2   6  -7 1328.97 187.179  16
  -2   6   7 1761.54 277.670  19
   2   6  -7 1484.13 211.273  14
   2   6  -7 1399.74 325.002  31
   2   6  -7 1329.15 166.139  22
   2   6  -7 1232.93 172.623  11
   2   6  -7 1143.65 170.476   7
   2   6  -7 1417.32 323.730   3
  -2   6   7 1162.51 258.877  30
   2   6  -6 11667.5 521.402  14
   2   6  -6 10036.2 402.073  22
   2   6  -6 10180.5 389.016  33
   2   6  -6 11504.4 830.618  31
   2   6  -6 10815.6 443.476  11
   2   6  -6 10629.2 776.628   3
  -2   6   6 9873.58 662.618  30
   2   6  -5 6160.05 608.553  31
  -2   6   5 4502.91 372.605   3
   2   6  -5 3813.50 231.658  22
  -2   6   5 4392.79 408.214  30
   2   6  -5 5994.61 568.423   3
   2   6  -5 5340.80 593.225  20
  -2   6   4 38791.0 1095.60   3
  -2   6   4 40172.3 1106.37  30
  -2   6   4 45906.6 1427.34  31
   2   6  -4 51615.1 1505.58   3
   2   6  -4 38178.7 1513.47  20
   2   6  -4 49708.2 1651.47  31
  -2   6   3 51040.7 784.545   2
   2   6  -3 55240.6 1683.43  31
  -2   6   3 50480.5 1098.41  30
   2   6  -3 54929.4 1662.56  20
   2   6  -3 58854.7 1511.79   3
  -2   6   3 57517.4 1523.47  31
  -2   6   3 49513.2 1271.93   3
   2   6  -2 35635.8 1266.88  31
   2   6  -2 37848.5 1289.08  20
  -2   6   2 32972.2 781.953  30
   2   6  -2 38382.3 1146.74   3
  -2   6   2 35941.5 1161.18  31
  -2   6   2 33966.3 1035.68   3
   2   6  -1 27382.6 898.007   3
  -2   6   1 26788.4 981.207  31
  -2   6   1 25468.5 908.626   3
   2   6  -1 27278.2 1005.73  31
   2   6   0 54696.6 1267.21  31
   2   6   0 54771.8 1171.81   3
  -2   6   0 56271.1 1360.36   3
  -2   6   0 56610.8 1426.21  31
  -2   6  -1 25753.9 1003.42  31
  -2   6  -1 26228.6 960.665   3
   2   6   1 27711.9 1022.38  20
  -2   6  -2 11016.9 647.489   3
  -2   6  -2 11258.8 733.535  31
   2   6   2 9210.30 439.942  31
  -2   6  -2 10985.2 409.003  33
   2   6   2 10258.6 626.569  20
   2   6   3 35987.7 1192.35  20
  -2   6  -3 34704.3 1180.95   3
  -2   6  -3 36280.6 1496.99  31
  -2   6  -3 33428.1 782.140  33
   2   6   4 20752.7 924.491  20
  -2   6  -4 18417.8 638.049  33
  -2   6  -4 19809.2 940.862   3
  -2   6  -4 19173.2 1209.81  31
   2   6   5 26567.8 1339.03  19
  -2   6  -5 20976.0 1348.99  31
  -2   6  -5 16795.5 737.625  14
  -2   6  -5 22479.0 1074.03   3
  -2   6  -5 19932.9 676.684   4
  -2   6  -5 21759.0 749.746  33
  -2   6  -5 26028.7 736.583  11
   2   6   5 23472.9 1015.55  20
  -2   6  -6 7922.64 480.750  33
  -2   6  -6 8339.29 530.822  14
  -2   6  -6 8137.33 686.902   3
  -2   6  -6 7634.23 823.433  31
  -2   6  -6 9758.89 512.385   4
   2   6   6 8235.62 805.721  19
  -2   6  -6 8832.21 446.080  26
  -2   6  -6 9196.75 466.752  11
  -2   6  -7 1393.88 224.492  33
  -2   6  -7 1171.77 289.545   3
  -2   6  -7 1583.23 241.710  14
  -2   6  -7 1498.58 211.903  11
  -2   6  -7 1210.04 191.802  26
   2   6   7 1806.10 401.854  19
  -2   6  -7 1213.46 319.639  31
  -2   6  -8 4490.29 358.599  11
   2   6   8 3924.05 635.739  19
   2   6   8 3701.69 495.997  32
  -2   6  -8 3970.46 364.058  33
  -2   6  -8 2839.70 511.674  31
  -2   6  -8 4003.28 354.096  26
  -2   6  -9 288.433 141.334  33
  -2   6  -9 379.320 138.913  26
   2   6   9 630.901 223.523  32
  -2   6  -9 538.201 154.098  11
  -2   6  -9 526.841 190.777  31
   2   6   9 252.671 170.503  19
  -2   6 -10 6837.23 498.478  26
  -2   6 -10 7218.11 473.605  33
  -2   6 -10 7461.28 468.924  11
  -2   6 -10 6811.82 472.591  16
  -2   6 -11 2712.10 321.309  26
  -2   6 -11 2446.04 282.053  16
  -2   6 -11 1833.36 225.589  33
  -2   6 -11 2500.13 265.371  11
  -2   6 -11 2949.38 364.625   8
  -2   6 -12 145.203 113.903  26
  -2   6 -12 227.647 83.6675  11
  -2   6 -12 140.245 99.6415  16
   2   6  12 86.6042 91.1097  21
  -2   6 -12 254.909 141.543   8
  -2   6 -13 255.963 117.956   8
   2   6  13-12.3913 62.0035  21
  -2   6 -13 323.289 125.386  26
  -2   6 -14-163.260 73.7462   8
   2   7 -15 526.455 114.564  16
   2   7 -15 485.364 121.294   9
   2   7 -14 163.931 93.4773  16
   2   7 -14 181.879 88.1616  22
   2   7 -13 55.2797 83.8731  22
   2   7 -13 42.7524 107.558  16
   2   7 -12 754.727 168.054  22
   2   7 -12 1000.25 219.858  16
   2   7 -11 84.0525 97.5594  22
   2   7 -11 61.9012 124.322  16
   2   7 -10 475.498 203.460  31
  -2   7  10 91.4021 91.6091  30
   2   7 -10 596.584 168.190  11
   2   7 -10 464.650 139.610  22
   2   7 -10 502.349 175.238  16
   2   7  -9 435.276 152.759  16
  -2   7   9 586.636 232.526  30
   2   7  -9 560.036 146.345  11
   2   7  -9 756.272 164.383  22
   2   7  -9 316.864 119.375   7
   2   7  -9 839.115 265.821  31
   2   7  -8 815.261 273.882  31
   2   7  -8 368.557 237.665   3
   2   7  -8 744.231 146.091   7
   2   7  -8 816.561 178.304  11
  -2   7   8 495.721 201.214  30
   2   7  -8 792.140 148.186  22
   2   7  -8 950.767 188.133  16
   2   7  -7 703.819 171.143  14
   2   7  -7 712.033 144.526  11
  -2   7   7 509.245 197.112  31
   2   7  -7 297.169 104.982   7
   2   7  -7 417.295 102.368  33
   2   7  -7 499.191 111.494  22
   2   7  -7 617.397 239.805   3
   2   7  -7 565.621 242.360  31
   2   7  -7 453.333 131.306  16
  -2   7   7 341.742 146.691  30
   2   7  -6 6023.40 417.662  14
   2   7  -6 4639.57 325.345  16
   2   7  -6 3746.36 515.427  20
   2   7  -6 3762.15 311.654   7
   2   7  -6 5258.11 595.759  31
   2   7  -6 5501.68 345.109  11
   2   7  -6 4926.53 295.012  22
   2   7  -6 4990.09 572.999   3
  -2   7   6 4433.65 458.484  30
   2   7  -6 3207.46 240.019  33
  -2   7   6 4308.02 504.042  31
   2   7  -5 3136.21 248.061  11
   2   7  -5 2978.15 431.280   3
   2   7  -5 2896.81 211.088  22
  -2   7   5 2669.64 389.409  31
   2   7  -5 2785.84 459.164  31
   2   7  -5 1801.34 168.604  33
   2   7  -5 2104.34 424.564  20
  -2   7   5 1573.52 247.568  30
  -2   7   5 1943.89 248.309   3
  -2   7   4 8966.44 680.043  31
  -2   7   4 7683.96 481.948  30
  -2   7   4 7523.47 508.094   3
   2   7  -4 8581.74 785.809  31
   2   7  -4 7618.13 725.366  20
   2   7  -4 9122.93 697.521   3
   2   7  -3 5343.53 573.099  20
  -2   7   3 4559.61 323.463  30
   2   7  -3 5564.86 258.168  22
  -2   7   3 3929.04 373.393   3
   2   7  -3 6028.85 531.423   3
   2   7  -3 5788.09 614.065  31
  -2   7   3 5727.79 526.012  31
  -2   7   2 46865.5 1436.18  31
  -2   7   2 45719.1 1284.88   3
   2   7  -2 49045.2 1398.62   3
   2   7  -2 50705.4 1609.55  20
   2   7  -2 44207.8 1545.13  31
   2   7  -1 117855. 2300.99  31
  -2   7   1 121021. 2124.37   3
   2   7  -1 113743. 2008.79   3
  -2   7   1 118974. 2229.29  31
   2   7   0 93964.1 1859.89  31
  -2   7   0 98943.3 1184.48  33
   2   7   0 84763.8 1611.65   3
   2   7   0 114084. 2292.79  20
  -2   7   0 101010. 1984.00   3
  -2   7   0 100565. 2071.19  31
   2   7   1 34672.0 927.963   3
  -2   7  -1 43468.6 821.067  33
   2   7   1 51050.6 1515.24  20
  -2   7  -1 46639.2 1373.99   3
   2   7   1 40593.1 1119.64  31
  -2   7  -1 44356.2 1433.51  31
  -2   7  -2 22064.6 628.354  33
   2   7   2 25522.5 840.020  31
   2   7   2 29867.8 1179.28  20
  -2   7  -2 28305.6 1104.57   3
  -2   7  -2 25525.9 841.717  20
  -2   7  -2 28467.4 1260.04  31
   2   7   3 56223.9 1626.71  20
  -2   7  -3 54524.6 1009.19   4
  -2   7  -3 53305.4 1568.97   3
  -2   7  -3 51235.5 1036.70  33
  -2   7  -3 56578.0 1981.09  31
  -2   7  -4 1574.42 205.805  33
  -2   7  -4 1240.78 359.850  31
  -2   7  -4 1685.20 247.283  14
  -2   7  -4 2076.83 342.526   3
  -2   7  -4 1633.03 192.179  11
  -2   7  -4 2014.99 226.913   4
   2   7   4 2214.23 332.498  20
  -2   7  -5 3317.28 379.231  14
   2   7   5 3885.32 463.488  20
  -2   7  -5 4174.17 336.155   4
  -2   7  -5 3002.54 569.021  31
  -2   7  -5 3525.92 320.275  33
  -2   7  -5 3673.71 471.522   3
  -2   7  -5 3194.63 256.500  26
   2   7   5 4440.18 569.098  19
  -2   7  -5 3946.74 309.969  11
  -2   7  -6 7732.72 420.834  26
  -2   7  -6 8361.77 740.107   3
  -2   7  -6 7247.12 819.485  31
  -2   7  -6 9309.15 492.729  11
  -2   7  -6 9177.48 586.884  14
  -2   7  -6 9170.81 533.304   4
  -2   7  -6 8187.35 512.346  33
   2   7   6 9702.43 900.396  19
  -2   7  -7 8278.07 565.539  14
  -2   7  -7 7836.43 523.483  33
  -2   7  -7 8587.80 495.892  11
   2   7   7 9103.66 915.006  19
  -2   7  -7 7069.51 717.893   3
  -2   7  -7 7259.14 445.253  26
  -2   7  -8 369.828 137.906  26
  -2   7  -8-37.8772 124.822  33
   2   7   8 282.056 143.975  32
  -2   7  -8 177.559 126.606  31
   2   7   8 687.304 296.179  19
  -2   7  -8 232.973 132.727  14
  -2   7  -8 424.960 162.009  11
  -2   7  -8 414.821 185.619   3
  -2   7  -9 13318.5 667.504  33
  -2   7  -9 14554.8 661.351  11
  -2   7  -9 12774.9 646.347  26
  -2   7 -10 2990.11 315.066  33
  -2   7 -10 3080.87 316.830  11
  -2   7 -10 2964.57 330.105  16
  -2   7 -10 2879.09 355.577   8
  -2   7 -10 2555.83 306.550  26
  -2   7 -11 207.385 94.0571  33
   2   7  11 142.035 81.0401  21
  -2   7 -11 392.296 159.019   8
  -2   7 -11 233.833 121.484  16
  -2   7 -11-104.691 101.852  26
  -2   7 -11 252.216 115.828  11
  -2   7 -12-75.5445 91.3946  16
  -2   7 -12-28.0559 79.6587  11
  -2   7 -12 38.5806 81.1209  26
  -2   7 -12 49.8855 86.9734   8
   2   7  12 102.564 81.0482  21
  -2   7 -13-82.4024 83.4922   8
   2   8 -15 260.855 88.5009  16
   2   8 -15 236.263 86.8206   9
   2   8 -14 488.853 125.068  16
   2   8 -14 436.616 106.917  22
   2   8 -13 1585.43 229.479  16
   2   8 -13 938.635 161.500  22
   2   8 -12 838.448 215.949  16
   2   8 -12 774.908 164.655  22
   2   8 -11 639.604 158.588  22
   2   8 -11 890.488 209.967  16
   2   8 -10 20799.1 849.730  16
   2   8 -10 20109.5 796.383  11
   2   8 -10 18364.3 734.418  22
  -2   8   9 7804.83 773.824  31
   2   8  -9 8787.54 513.445   7
   2   8  -9 15339.6 706.799  16
   2   8  -9 16602.3 713.475  11
   2   8  -9 15411.6 646.638  22
   2   8  -9 16076.7 1132.95  31
   2   8  -8 1532.63 234.920  16
   2   8  -8 1784.31 257.812  14
   2   8  -8 973.729 315.463   3
   2   8  -8 1340.31 221.688   7
   2   8  -8 1444.83 220.064  11
   2   8  -8 1422.23 201.318  22
   2   8  -8 1499.52 373.262  31
  -2   8   8 1199.58 294.606  31
   2   8  -7 3782.46 329.951  16
   2   8  -7 4833.12 400.973  14
   2   8  -7 3514.45 332.605   7
   2   8  -7 4156.72 337.287  11
   2   8  -7 4305.78 592.066  31
   2   8  -7 3456.07 525.020   3
   2   8  -7 3923.43 296.957  22
  -2   8   7 3420.73 482.404  31
   2   8  -7 2305.39 235.982  33
   2   8  -6 6221.23 354.041  33
   2   8  -6 5864.03 380.832  16
   2   8  -6 5654.18 692.325  31
   2   8  -6 7856.09 505.777  14
   2   8  -6 5587.63 415.345   7
   2   8  -6 6900.71 409.151  11
   2   8  -6 6121.30 343.815  22
   2   8  -6 6545.57 693.211   3
  -2   8   6 5120.17 580.742  31
  -2   8   5 3519.23 465.165  31
   2   8  -5 2360.04 467.968  20
   2   8  -5 3312.92 238.342  22
   2   8  -5 3717.81 514.382   3
   2   8  -5 3447.24 254.283  33
   2   8  -5 4105.62 301.186  11
   2   8  -5 3355.50 328.783  14
   2   8  -5 3561.92 539.137  31
   2   8  -4 4782.55 373.237  14
   2   8  -4 6570.69 334.174  33
  -2   8   4 6062.76 481.549   3
   2   8  -4 7222.25 658.206   3
   2   8  -4 6100.81 696.539  20
   2   8  -4 6754.39 319.714  22
   2   8  -4 5544.70 327.306  11
  -2   8   4 6555.47 615.991  31
   2   8  -4 6268.10 703.860  31
   2   8  -3 41485.5 1688.28  20
  -2   8   3 38852.0 1253.11   3
   2   8  -3 42274.4 763.952  22
   2   8  -3 45395.4 1555.06   3
  -2   8   3 42500.2 1505.28  31
   2   8  -3 42243.5 1753.73  31
  -2   8   2 589.737 208.570  31
   2   8  -2 626.236 213.417   3
  -2   8   2 571.463 192.269   3
   2   8  -2 194.108 63.7922  22
   2   8  -2 292.872 187.346  31
   2   8  -2 620.074 250.554  20
   2   8  -1 52134.0 1701.37  31
  -2   8   1 50851.4 1482.74   3
   2   8  -1 50369.4 1451.47   3
  -2   8   1 52715.6 1616.36  31
  -2   8   0 6463.46 548.135   3
  -2   8   0 5703.93 550.106  31
   2   8   0 3967.98 235.253  22
   2   8   0 4872.19 432.820   3
  -2   8   0 6059.87 324.796  33
   2   8   0 5810.60 528.537  31
   2   8   0 6867.28 630.233  20
  -2   8  -1 9428.20 421.961  33
  -2   8  -1 8152.91 550.520  20
  -2   8  -1 8560.53 700.904  31
  -2   8  -1 9154.64 660.496   3
   2   8   1 8259.44 576.645  31
   2   8   1 10293.7 751.981  20
  -2   8  -2 2551.00 297.028  20
  -2   8  -2 2557.66 227.328   4
  -2   8  -2 2729.51 397.215   3
  -2   8  -2 3081.07 257.208  33
  -2   8  -2 3134.46 460.690  31
   2   8   2 3228.97 434.762  20
  -2   8  -3 14215.2 581.956  33
  -2   8  -3 12558.5 635.718  20
  -2   8  -3 15001.3 1101.82  31
  -2   8  -3 14817.9 894.091   3
  -2   8  -3 14720.9 568.704   4
   2   8   3 15991.1 961.504  20
  -2   8  -3 15880.3 580.595  11
   2   8   4 16942.1 1012.70  20
  -2   8  -4 15379.2 738.008  14
  -2   8  -4 15932.8 658.803  33
  -2   8  -4 15865.4 966.882   3
  -2   8  -4 16754.6 652.075   4
  -2   8  -4 17864.8 650.284  11
  -2   8  -4 14862.2 1188.14  31
  -2   8  -5 1177.93 209.337   4
   2   8   5 1272.50 283.706  20
  -2   8  -5 1481.20 222.822  33
  -2   8  -5 1453.01 208.540  11
  -2   8  -5 838.382 334.765  31
  -2   8  -5 1003.56 249.222  14
  -2   8  -5 1235.12 297.249   3
  -2   8  -6 10112.7 598.610  33
   2   8   6 11792.3 1046.47  19
  -2   8  -6 9509.83 828.338   3
  -2   8  -6 11127.4 562.461  11
  -2   8  -6 11311.3 614.311   4
  -2   8  -6 10608.3 671.589  14
  -2   8  -7 890.934 156.630  26
  -2   8  -7 1159.38 210.647  11
  -2   8  -7 1255.84 260.829  14
  -2   8  -7 1064.97 226.086  33
  -2   8  -7 1271.63 341.032  31
   2   8   7 1060.38 325.469  19
  -2   8  -7 849.360 290.049   3
  -2   8  -8 3467.17 547.925   3
   2   8   8 4193.20 670.305  19
  -2   8  -8 5057.88 437.694  14
  -2   8  -8 4747.10 403.971  11
  -2   8  -8 2988.69 505.040  31
  -2   8  -8 3401.13 317.720  26
  -2   8  -8 4146.22 401.312  33
  -2   8  -9 594.144 148.345  26
  -2   8  -9 519.602 156.273  33
  -2   8  -9 368.620 152.797  11
  -2   8 -10 748.478 192.911  16
  -2   8 -10 542.038 143.002  26
  -2   8 -10 697.647 170.051  11
  -2   8 -10 430.221 159.985   8
  -2   8 -10 551.089 165.088  33
  -2   8 -11 1031.92 202.938   8
  -2   8 -11 555.790 125.845  33
  -2   8 -11 991.429 194.468  16
  -2   8 -11 882.032 172.274  11
  -2   8 -12 117.478 79.7813  11
  -2   8 -12 188.424 97.9842   8
  -2   8 -12 73.5024 87.5113  16
   2   9 -14-94.7902 78.0578  16
   2   9 -13 1333.67 208.735  16
   2   9 -13 756.982 137.842  22
   2   9 -12 1295.70 184.221  22
   2   9 -12 1781.47 259.688  16
   2   9 -11 680.058 201.056  16
   2   9 -11 457.643 131.028  22
   2   9 -10 45.7995 140.429  16
   2   9 -10 55.2035 94.7256  22
   2   9  -9 5470.74 442.997  16
   2   9  -9 6329.46 461.952  11
   2   9  -9 5146.74 386.348  22
   2   9  -8 1596.38 279.801  14
   2   9  -8 1697.97 255.479  11
   2   9  -8 1478.00 239.989  16
   2   9  -8 1345.16 195.554  33
  -2   9   8 1480.91 274.887  20
   2   9  -8 1008.78 308.797  31
   2   9  -8 1223.65 232.903   7
   2   9  -8 1752.60 223.135  22
  -2   9   8 914.649 274.284  31
   2   9  -7 5939.19 426.046  16
   2   9  -7 7048.30 525.907  14
   2   9  -7 4603.20 344.733  33
   2   9  -7 5162.34 428.861   7
   2   9  -7 7271.92 464.372  11
  -2   9   7 4854.51 588.875  31
   2   9  -7 6490.46 387.984  22
   2   9  -7 5657.03 699.433   3
   2   9  -7 6635.21 780.670  31
   2   9  -6 809.200 314.589  31
   2   9  -6 626.685 175.852   7
   2   9  -6 758.130 267.857   3
   2   9  -6 749.757 131.559  22
   2   9  -6 659.391 127.309  33
  -2   9   6 331.179 181.659  31
   2   9  -6 490.797 218.928  20
   2   9  -6 772.745 161.676  11
   2   9  -6 640.442 151.410  16
   2   9  -6 779.340 205.064  14
   2   9  -5 6448.98 344.573  22
   2   9  -5 4715.95 686.637  20
   2   9  -5 6804.40 712.705   3
   2   9  -5 6048.67 727.295  31
  -2   9   5 6327.39 648.200  31
   2   9  -5 6433.09 369.088  33
   2   9  -5 7121.65 509.435  14
   2   9  -5 7283.04 419.702  11
   2   9  -4 17179.9 1241.61  31
   2   9  -4 15742.2 1205.11  20
   2   9  -4 17646.8 539.620  22
   2   9  -4 18618.2 610.057  33
   2   9  -4 18297.4 1101.62   3
  -2   9   4 16136.9 811.660   3
  -2   9   4 17797.3 1064.13  31
   2   9  -4 19648.8 642.323  11
   2   9  -4 17699.2 763.386  14
   2   9  -3 28286.2 721.999  11
   2   9  -3 25743.0 881.091  14
   2   9  -3 24367.0 1432.22  31
   2   9  -3 26400.7 1461.37  20
   2   9  -3 27309.2 649.419  22
   2   9  -3 27431.0 1291.89   3
  -2   9   3 28368.5 1311.92  31
  -2   9   3 25640.7 1073.71   3
   2   9  -2 227.337 188.458  20
   2   9  -2 273.814 72.1427  22
   2   9  -2 294.366 111.787  14
  -2   9   2 242.733 163.874  31
  -2   9   2 507.011 171.853   3
   2   9  -2 226.119 165.688  31
   2   9  -2 413.938 186.683   3
   2   9  -1 9075.78 799.902  20
   2   9  -1 8178.99 732.196  31
   2   9  -1 7727.57 337.500  22
   2   9  -1 7873.50 631.593   3
  -2   9   1 7650.35 617.555   3
  -2   9   1 6749.25 627.657  31
   2   9   0 17129.9 1073.45  20
  -2   9   0 14227.5 540.584  33
   2   9   0 14529.2 787.554   3
  -2   9   0 14188.8 856.754   3
   2   9   0 14283.9 915.848  31
  -2   9   0 14664.7 946.550  31
  -2   9   0 13324.2 774.497  20
   2   9   0 13962.8 461.299  22
   2   9   1 617.846 178.998  31
  -2   9  -1 788.423 135.688   4
   2   9   1 534.449 104.650  22
  -2   9  -1 690.800 126.828  11
  -2   9  -1 1113.13 286.432  31
   2   9   1 620.097 215.992  20
  -2   9  -1 675.038 228.120   3
  -2   9  -1 581.057 133.862  33
  -2   9  -1 341.367 137.417  20
  -2   9  -2 15373.6 939.431   3
   2   9   2 19011.7 1135.95  20
  -2   9  -2 16086.4 1107.01  31
  -2   9  -2 15531.4 592.884   4
  -2   9  -2 14296.4 764.336  20
  -2   9  -2 16774.3 589.736  11
  -2   9  -2 17150.6 643.096  33
  -2   9  -3 12907.0 591.969  33
  -2   9  -3 12402.2 654.718  14
  -2   9  -3 13037.6 575.650   4
  -2   9  -3 13829.5 570.984  11
  -2   9  -3 12181.6 1060.34  31
  -2   9  -3 13425.9 911.268   3
  -2   9  -3 10872.7 658.130  20
   2   9   3 14547.7 1007.33  20
  -2   9  -4 1243.37 416.842  31
  -2   9  -4 1016.47 292.063   3
  -2   9  -4 2087.70 243.228  11
  -2   9  -4 1512.71 228.758  33
  -2   9  -4 1537.52 276.838  14
   2   9   4 1439.45 327.787  20
  -2   9  -4 1297.46 210.405   4
  -2   9  -5 1374.51 235.007  33
  -2   9  -5 1200.52 282.598  14
  -2   9  -5 1661.78 239.089  11
  -2   9  -5 1212.74 228.552   4
   2   9   5 963.321 275.252  20
  -2   9  -5 924.624 360.428  31
  -2   9  -5 1184.31 330.143   3
  -2   9  -6 4616.15 608.142   3
  -2   9  -6 5123.30 452.188  33
  -2   9  -6 4698.44 475.014  14
   2   9   6 6372.14 784.355  19
  -2   9  -6 5645.12 426.054  11
  -2   9  -7 15714.8 779.871  33
  -2   9  -7 18037.9 762.038  11
   2   9   7 12771.8 1122.22  19
  -2   9  -7 12097.1 973.721   3
  -2   9  -7 11933.4 1085.11  31
  -2   9  -7 16474.2 828.646  14
  -2   9  -8 7455.10 542.202  33
  -2   9  -8 8734.16 572.080  14
  -2   9  -8 8700.46 546.941  11
  -2   9  -9 3617.52 361.825  33
  -2   9  -9 4246.81 382.444  11
  -2   9  -9 4046.86 402.146  16
  -2   9 -10 853.458 191.074  16
  -2   9 -10 1184.79 213.291  11
  -2   9 -10 1079.67 196.919  33
  -2   9 -10 1222.73 211.104   8
  -2   9 -11 474.519 138.519  11
  -2   9 -11 604.555 157.844  16
  -2   9 -11 462.522 111.094  33
  -2   9 -12-169.806 83.1085  11
  -2   9 -12-0.50273 70.8486  16
   2  10 -14 257.821 84.8871  16
   2  10 -13 616.182 137.535  16
   2  10 -12 477.015 149.338  16
   2  10 -11 1509.63 250.651  16
   2  10 -11 611.500 123.452  22
   2  10 -10 4653.46 412.430  16
   2  10 -10 4423.97 338.761  22
   2  10 -10 4005.99 334.146   7
   2  10  -9 4499.17 393.145   7
   2  10  -9 5324.86 437.476  16
   2  10  -9 4866.60 359.778  22
   2  10  -8 2089.92 300.009   7
  -2  10   8 1431.55 286.830  20
   2  10  -8 2612.27 274.642  33
   2  10  -8 2323.19 294.157  16
   2  10  -8 3164.23 367.825  14
   2  10  -8 2445.60 254.993  22
   2  10  -8 3018.25 334.335  11
  -2  10   7 776.237 247.087  31
   2  10  -7 507.130 155.654  16
   2  10  -7 598.070 200.417   7
   2  10  -7 750.518 189.843  11
  -2  10   7 554.779 188.910  20
   2  10  -7 594.254 129.797  22
   2  10  -7 778.669 348.384   3
   2  10  -7 712.488 206.783  14
   2  10  -7 479.938 252.779  31
   2  10  -7 517.726 129.171  33
   2  10  -6 9569.70 608.727   7
   2  10  -6 9974.68 531.868  16
   2  10  -6 10865.4 486.045  22
   2  10  -6 12016.9 677.657  14
   2  10  -6 11750.9 557.985  33
   2  10  -6 11212.2 975.713   3
  -2  10   6 8783.00 731.503  20
  -2  10   6 8370.90 795.995  31
   2  10  -6 10622.0 984.954  31
   2  10  -6 11878.3 587.296  11
   2  10  -5-52.7073 157.809   3
   2  10  -5 9.08304 127.842  14
   2  10  -5 56.1513 116.315   7
   2  10  -5 121.855 113.909  11
  -2  10   5 335.379 171.489  20
  -2  10   5 305.101 169.278  31
   2  10  -5 34.9816 171.608  31
   2  10  -5 125.548 203.653  20
   2  10  -5 164.457 86.6421  33
   2  10  -5 121.484 92.8740  16
   2  10  -4 19551.2 670.392  33
   2  10  -4 17559.6 805.740  14
  -2  10   4 17426.4 1030.41  20
   2  10  -4 15662.2 1238.33  31
   2  10  -4 13178.3 487.212  22
   2  10  -4 20072.4 1214.67   3
   2  10  -4 15413.9 1262.28  20
  -2  10   4 17851.7 1112.34  31
   2  10  -4 20285.4 684.941  11
  -2  10   3 23935.1 1071.38   3
  -2  10   3 26338.3 1334.38  31
   2  10  -3 24776.3 923.505  14
  -2  10   3 25321.4 1229.74  20
   2  10  -3 24500.3 1519.27  20
   2  10  -3 28093.5 1378.72   3
   2  10  -3 24713.8 1519.94  31
   2  10  -2 220.663 199.903  20
  -2  10   2 149.936 141.306  20
   2  10  -2 52.5643 97.4463  14
  -2  10   2 84.9922 117.443   3
   2  10  -2-105.228 131.914  31
  -2  10   2-23.8708 105.528  31
   2  10  -2-14.9200 58.8682  22
   2  10  -2 176.430 164.973   3
  -2  10   1 27981.9 800.922  33
   2  10  -1 27381.2 1236.60   3
  -2  10   1 26208.9 1200.33   3
  -2  10   1 28112.6 1374.89  31
   2  10  -1 24895.1 1405.17  31
  -2  10   1 24669.5 1176.10  20
  -2  10   1 24450.2 698.806   4
   2  10  -1 30294.9 1580.29  20
   2  10  -1 23993.6 818.689  14
  -2  10   0 9199.66 824.911  31
  -2  10   0 9977.14 767.553   3
   2  10   0 9297.60 808.448  31
  -2  10   0 9254.34 449.807   4
  -2  10   0 9974.67 497.115  33
  -2  10   0 8562.36 673.156  20
   2  10   0 11309.4 962.594  20
  -2  10  -1 10358.6 517.420  33
  -2  10  -1 8881.71 460.831   4
  -2  10  -1 8055.97 391.360  11
   2  10   1 10426.0 922.944  20
  -2  10  -1 8520.67 654.219  20
  -2  10  -1 10262.5 912.790  31
  -2  10  -1 9615.74 784.406   3
  -2  10  -2 7449.99 462.829  33
  -2  10  -2 6522.91 384.128  11
   2  10   2 6217.48 343.525  22
  -2  10  -2 6905.54 796.902  31
  -2  10  -2 7781.37 725.299   3
  -2  10  -2 7309.10 441.159   4
  -2  10  -2 6253.72 546.203  20
  -2  10  -3 3436.66 506.536   3
  -2  10  -3 3067.94 364.062  14
   2  10   3 3217.26 534.254  20
  -2  10  -3 3577.56 336.970  33
  -2  10  -3 3383.72 305.267  11
  -2  10  -3 3028.79 595.554  31
  -2  10  -3 3135.11 310.991   4
  -2  10  -4 3264.75 350.040  33
  -2  10  -4 3584.41 349.466   4
  -2  10  -4 2808.29 381.988  14
  -2  10  -4 3529.62 324.335  11
   2  10   4 2912.33 478.248  20
  -2  10  -4 2428.70 548.313  31
  -2  10  -4 3267.96 516.627   3
  -2  10  -5 921.749 363.284  31
  -2  10  -5 910.124 213.617   4
  -2  10  -5 1345.97 227.489  11
  -2  10  -5 1138.81 288.288  14
  -2  10  -5 874.720 299.686   3
   2  10   5 1175.44 317.899  20
  -2  10  -5 1159.71 236.783  33
  -2  10  -6 4799.23 726.994  31
  -2  10  -6 7103.86 548.704  33
  -2  10  -6 6088.25 709.744   3
   2  10   6 5968.51 758.919  19
  -2  10  -6 6780.09 576.888  14
  -2  10  -6 7876.40 516.579  11
  -2  10  -7 8194.04 615.136  14
  -2  10  -7 7461.24 565.607  33
  -2  10  -8 1500.28 266.192  33
  -2  10  -8 1617.01 260.230  11
  -2  10  -8 1296.34 262.982  14
  -2  10  -9 3025.41 329.076  33
  -2  10  -9 2833.46 327.214  16
  -2  10  -9 3694.22 355.107  11
  -2  10 -10 2350.36 274.882  11
  -2  10 -10 1832.32 230.956  33
  -2  10 -10 2076.84 266.567  16
  -2  10 -11 838.404 137.453  33
  -2  10 -11 1067.49 171.139  11
  -2  10 -11 763.043 157.013  16
  -2  10 -12 117.852 73.7687  16
   2  11 -13 283.530 95.6577  16
   2  11 -12 540.159 140.176  16
   2  11 -11 544.645 163.909  16
   2  11 -10 521.818 130.716   7
   2  11 -10 799.649 191.516  16
   2  11  -9 961.520 204.779   7
   2  11  -9 1406.54 240.553  16
   2  11  -8 1544.11 245.793  16
   2  11  -8 1377.58 247.718   7
   2  11  -8 1816.93 247.464  33
   2  11  -7 446.208 122.625  33
   2  11  -7 498.363 165.398  16
   2  11  -7 405.489 172.504  14
   2  11  -7 243.885 169.681   7
   2  11  -6 185.944 125.085  16
   2  11  -6-215.183 227.301   3
   2  11  -6 254.550 163.983   7
   2  11  -6 69.6381 113.533  11
  -2  11   6 333.240 165.903  31
  -2  11   6 135.969 126.526  20
   2  11  -6-238.463 183.107  31
   2  11  -6 99.8860 88.0252  33
   2  11  -6 258.095 156.721  14
   2  11  -5 2406.14 504.130  31
   2  11  -5 3205.38 382.998  14
   2  11  -5 2931.74 288.767  16
  -2  11   5 2497.80 444.318  31
   2  11  -5 3228.66 381.481   7
  -2  11   5 2452.16 405.971  20
   2  11  -5 2916.76 501.380   3
   2  11  -5 3417.41 310.635  33
   2  11  -4 1706.72 291.297  14
  -2  11   4 1678.49 338.303  20
   2  11  -4 1819.24 409.536   3
   2  11  -4 1889.69 296.357   7
   2  11  -4 1688.77 451.225  20
   2  11  -4 2013.25 226.145  16
   2  11  -4 1891.15 234.480  33
  -2  11   4 1638.17 363.844  31
   2  11  -4 1895.12 446.905  31
   2  11  -3 3767.03 396.519  14
   2  11  -3 4318.59 339.640  33
   2  11  -3 4475.00 585.860   3
   2  11  -3 2522.00 493.115  31
  -2  11   3 3445.29 490.093  20
  -2  11   3 3114.28 495.666  31
   2  11  -3 3624.68 646.503  20
   2  11  -2 1740.61 257.699  14
  -2  11   2 2234.22 425.657  31
  -2  11   2 1936.02 231.680  33
   2  11  -2 1306.98 365.442  31
  -2  11   2 1639.14 350.719  20
  -2  11   2 1237.65 283.326   3
   2  11  -2 2332.78 523.758  20
   2  11  -2 1791.18 360.457   3
   2  11  -1 941.552 288.903  31
   2  11  -1 2620.74 512.821  20
  -2  11   1 1904.87 377.246   3
   2  11  -1 1998.52 268.725  14
  -2  11   1 1139.66 307.244  31
  -2  11   1 1884.07 357.863  20
  -2  11   1 1673.56 202.809   4
  -2  11   1 1868.46 235.388  33
  -2  11   0 6515.33 752.779  31
  -2  11   0 6511.43 628.564  20
  -2  11   0 7062.57 419.256   4
  -2  11   0 7918.28 472.757  33
  -2  11   0 6807.62 678.439   3
   2  11   0 7851.43 884.145  20
  -2  11  -1 105.177 158.859   3
  -2  11  -1 169.161 115.060  33
  -2  11  -1 333.637 119.731   4
  -2  11  -1 353.046 167.625  20
   2  11   1 237.567 209.760  20
  -2  11  -1 741.580 295.037  31
  -2  11  -2 11353.4 1100.36  31
  -2  11  -2 12377.0 605.376   4
  -2  11  -2 11486.8 523.357  11
   2  11   2 10703.6 454.540  22
   2  11   2 12902.2 1122.97  20
  -2  11  -2 13278.4 653.010  33
  -2  11  -2 12581.8 975.349   3
  -2  11  -3 12760.8 762.408  14
  -2  11  -3 13428.8 659.152   4
  -2  11  -3 13208.3 601.009  11
   2  11   3 10845.1 474.397  22
  -2  11  -3 14759.0 721.526  33
  -2  11  -3 12163.8 987.261   3
   2  11   3 14995.0 1221.69  20
  -2  11  -3 11856.3 1163.22  31
  -2  11  -4 2636.73 489.898   3
  -2  11  -4 2097.25 363.724  14
  -2  11  -4 2938.07 344.607   4
  -2  11  -4 3092.18 630.105  31
  -2  11  -4 2697.63 341.844  33
   2  11   4 2349.02 482.612  20
  -2  11  -4 2932.10 310.745  11
   2  11   4 1698.89 200.549  22
  -2  11  -5 15791.2 716.398  11
  -2  11  -5 14004.8 758.917  33
   2  11   5 12874.1 1116.69  20
  -2  11  -5 12611.0 802.153  14
  -2  11  -6 5984.59 559.187  14
  -2  11  -6 6862.92 544.123  33
  -2  11  -6 7559.43 519.723  11
  -2  11  -7 521.169 170.101  11
  -2  11  -7 351.230 181.581  14
  -2  11  -7 511.209 199.368  33
  -2  11  -8 1820.85 290.722  14
  -2  11  -8 1973.47 291.110  33
  -2  11  -9 710.816 172.725  11
  -2  11  -9 538.256 168.596  16
  -2  11  -9 526.520 164.906  33
  -2  11 -10 86.8980 110.484  16
  -2  11 -10 153.467 112.424  11
  -2  11 -10 63.8997 83.5917  33
  -2  11 -11 195.691 89.7933  11
  -2  11 -11 303.478 104.350  16
   2  12 -12 60.4903 80.6881  16
   2  12 -11 1064.77 179.611  16
   2  12 -10 1162.03 204.921  16
   2  12 -10 816.263 149.408   7
   2  12  -9 165.339 117.817   7
   2  12  -9 47.5369 110.177  16
   2  12  -8 2665.06 303.341  16
   2  12  -8 1729.88 239.332  33
   2  12  -8 2061.00 294.699   7
   2  12  -7 33.5496 95.9674  16
   2  12  -7 60.1769 121.996  14
   2  12  -7-18.6949 123.669   7
   2  12  -7 81.9003 101.434  33
   2  12  -6 2232.51 280.910  33
   2  12  -6 1990.29 260.015  16
   2  12  -6 1789.32 304.680   7
   2  12  -6 1747.17 294.455  14
   2  12  -5 876.642 174.951  16
   2  12  -5 407.001 210.110  31
   2  12  -5 781.941 229.628  14
  -2  12   5 1029.93 300.798  31
   2  12  -5 739.244 221.114   7
   2  12  -5 1035.90 197.977  33
   2  12  -4 7423.07 568.524  14
   2  12  -4 8594.11 610.208   7
   2  12  -4 5280.23 672.069   3
  -2  12   4 8065.39 773.564  20
   2  12  -4 5888.18 771.484  31
  -2  12   4 5443.07 675.279  31
   2  12  -4 4920.32 754.721  20
   2  12  -4 9452.17 524.752  33
   2  12  -3 3122.98 626.420  20
  -2  12   3 3987.92 340.212  33
   2  12  -3 4018.71 344.443  33
   2  12  -3 3146.17 373.812  14
   2  12  -3 2454.21 483.345  31
   2  12  -3 3318.42 511.681   3
  -2  12   3 3271.87 516.660  20
  -2  12   3 3138.34 531.937  31
   2  12  -3 3932.77 417.188   7
   2  12  -2 5726.20 482.904  14
  -2  12   2 6570.72 785.501  31
   2  12  -2 6569.54 893.371  20
  -2  12   2 7774.32 478.701  33
   2  12  -2 6394.71 785.671  31
  -2  12   2 6736.97 705.727  20
  -2  12   1 7270.84 723.124  20
   2  12  -1 6351.45 482.880  14
  -2  12   1 7367.11 477.505  33
  -2  12   1 6171.20 668.376   3
  -2  12   1 8705.40 899.079  31
   2  12  -1 6968.68 904.375  20
   2  12   0 1356.56 234.909   7
  -2  12   0 1545.32 237.631  33
  -2  12   0 1327.86 299.595  20
  -2  12   0 1771.99 446.079  31
   2  12   0 2043.16 514.178  20
  -2  12   0 1675.07 222.895   4
  -2  12   0 1320.73 366.341   3
  -2  12  -1 7263.90 502.322  33
  -2  12  -1 6422.62 441.208   4
   2  12   1 5543.48 434.763   7
  -2  12  -1 4799.79 719.961  31
  -2  12  -1 5622.03 684.466   3
   2  12   1 7183.61 882.807  20
  -2  12  -1 5106.29 589.159  20
  -2  12  -2 7156.19 517.038  33
  -2  12  -2 4650.68 546.711  20
  -2  12  -2 6289.69 459.368   4
  -2  12  -2 5838.12 374.457  11
  -2  12  -2 4159.93 607.206   3
  -2  12  -2 6378.38 552.438  14
   2  12   2 4460.90 696.179  20
  -2  12  -2 5381.02 779.130  31
  -2  12  -3 1189.92 368.419   3
  -2  12  -3 1986.17 284.004   4
  -2  12  -3 1260.49 468.588  31
  -2  12  -3 1888.44 235.689  11
   2  12   3 1792.52 447.972  20
  -2  12  -3 1715.85 339.892  14
  -2  12  -3 1946.48 298.362  33
  -2  12  -4 1366.24 226.636  11
  -2  12  -4 1289.79 270.780  33
  -2  12  -4 1270.76 317.791  14
  -2  12  -5 145.434 159.318  33
  -2  12  -5 3.54670 113.948  11
  -2  12  -5 123.436 205.985  14
  -2  12  -6 1079.43 223.197  11
  -2  12  -6 719.853 244.906  14
  -2  12  -6 830.840 228.326  33
  -2  12  -7-183.304 153.527  33
  -2  12  -7 19.5966 147.709  14
  -2  12  -7-66.2749 83.5556   7
  -2  12  -7 94.8180 124.570  11
  -2  12  -8 546.427 181.009  16
  -2  12  -8 322.275 149.136  14
  -2  12  -8 377.576 146.950  11
  -2  12  -8 439.608 159.759  33
  -2  12  -9 537.118 158.808  16
  -2  12  -9 847.362 166.775  33
  -2  12  -9 938.235 186.108  11
  -2  12 -10 1500.84 199.344  16
  -2  12 -10 1715.55 205.250  11
  -2  12 -11 548.768 113.279  16
   2  13 -11 506.451 120.370  16
   2  13 -10 1471.46 175.054   7
   2  13 -10 2919.12 271.404  16
   2  13  -9 2830.02 279.422  16
   2  13  -9 2318.47 265.732   7
   2  13  -8 1310.02 204.459  16
   2  13  -8 1607.56 251.923   7
   2  13  -7 1221.60 235.982  14
   2  13  -7 1232.00 204.667  16
   2  13  -7 783.346 162.759  33
   2  13  -7 898.909 218.120   7
   2  13  -6 1095.96 188.146  16
  -2  13   6 643.667 148.598  33
   2  13  -6 869.963 229.842   7
   2  13  -6 849.233 191.270  33
   2  13  -6 1473.74 261.405  14
  -2  13   5 4898.88 380.748  33
   2  13  -5 4989.20 457.194  14
   2  13  -5 6325.07 453.119  33
   2  13  -5 6168.67 537.906   7
   2  13  -4 1497.22 294.545   7
   2  13  -4 1118.09 244.670  14
  -2  13   4 1150.94 207.922  33
   2  13  -4 1736.10 253.067  33
   2  13  -3 2159.31 323.662  14
   2  13  -3 3193.57 397.373   7
  -2  13   3 2229.94 273.436  33
   2  13  -3 2887.20 309.424  33
   2  13  -2 2722.76 341.258  14
   2  13  -2 3431.21 401.924   7
  -2  13   2 2647.63 310.002  33
   2  13  -2 3433.52 343.224  33
  -2  13   1 12363.2 645.377  33
   2  13  -1 11945.8 695.512   7
  -2  13   0 14019.9 633.621   4
   2  13   0 12050.4 674.203   7
  -2  13   0 13554.2 683.392  33
  -2  13  -1 1026.39 198.792   4
  -2  13  -1 878.686 251.318  14
   2  13   1 739.131 179.117   7
  -2  13  -1 758.116 210.356  33
  -2  13  -2 6133.62 576.127  14
  -2  13  -2 7050.22 498.436   4
  -2  13  -2 7588.02 552.685  33
  -2  13  -3 2417.06 259.812  11
  -2  13  -3 2211.20 381.115  14
  -2  13  -3 2474.85 342.410  33
  -2  13  -4 1061.67 263.804  33
  -2  13  -4 1296.88 211.375  11
  -2  13  -4 1141.14 316.042  14
  -2  13  -5 118.383 109.643  11
  -2  13  -5 97.3920 144.369  33
  -2  13  -5 339.826 202.868  14
  -2  13  -6 384.064 196.228  33
  -2  13  -6 208.730 187.339  14
  -2  13  -6 195.841 119.338  11
  -2  13  -7 69.4899 119.425  33
  -2  13  -7 136.891 141.677  14
  -2  13  -7 103.619 94.5595   7
  -2  13  -7 166.899 117.746  11
  -2  13  -8-65.6130 112.392  16
  -2  13  -8 18.9903 102.151  33
  -2  13  -8-41.4632 97.5575  11
  -2  13  -9 1954.69 223.196  11
  -2  13  -9 1247.33 171.830  33
  -2  13  -9 1677.88 207.978  16
  -2  13 -10 1208.28 159.162  16
   2  14 -10 2541.37 217.761  16
   2  14 -10 1684.19 160.447   7
   2  14  -9 776.153 142.872  16
   2  14  -9 444.391 121.811   7
   2  14  -8 286.062 104.120  16
   2  14  -8 407.089 143.361   7
   2  14  -7 570.204 123.168  16
   2  14  -7 539.850 130.763  33
   2  14  -7 696.215 191.767   7
   2  14  -6 1578.02 285.089   7
  -2  14   6 1078.70 181.528  33
   2  14  -6 1803.18 273.228  14
   2  14  -6 1640.02 250.237  33
   2  14  -5 648.281 187.559  14
   2  14  -5 348.535 195.286   7
  -2  14   5 204.647 114.803  33
   2  14  -5 224.795 125.480  33
   2  14  -4 280.855 128.521  33
   2  14  -4 126.052 160.411   7
   2  14  -4 312.906 147.982  14
  -2  14   4 42.3519 107.862  33
   2  14  -3 508.150 190.949   7
  -2  14   3 115.833 94.1902  33
   2  14  -3-9.29126 102.799  33
   2  14  -3 378.410 165.974  14
   2  14  -2 66.2701 147.230   7
   2  14  -2-27.6107 114.304  33
   2  14  -2 358.099 152.937  14
  -2  14   2 3.64945 107.631  33
   2  14  -1 624.244 194.578   7
   2  14  -1 1098.19 202.465  33
  -2  14   1 751.429 191.063  33
   2  14   0 403.110 163.519   7
  -2  14   0 448.303 208.959  14
  -2  14   0 586.218 181.586  33
  -2  14  -1 229.543 197.207  14
  -2  14  -1 246.589 147.891  33
   2  14   1 124.896 87.2605   7
  -2  14  -2 829.976 276.154  14
  -2  14  -2 830.449 218.546  33
  -2  14  -3 5895.91 575.845  14
  -2  14  -3 5942.70 498.620  33
  -2  14  -4 789.779 268.671  14
  -2  14  -4 624.059 137.954  11
  -2  14  -4 920.939 220.512  33
  -2  14  -5 625.989 212.513  33
  -2  14  -5 704.466 159.997  11
  -2  14  -5 403.580 210.257  14
  -2  14  -6 219.781 155.353  33
  -2  14  -6 210.401 113.214   7
[truncated: 1,034,012 more chars]
